# Supplementary material for: The transcriptome of syncytia induced by the cyst nematode Heterodera schachtii in Arabidopsis roots
Source: PubMed Central journal article supplement (PMC2667683; doi:10.1111/j.1365-313x.2008.03727.x), 2008-12-09

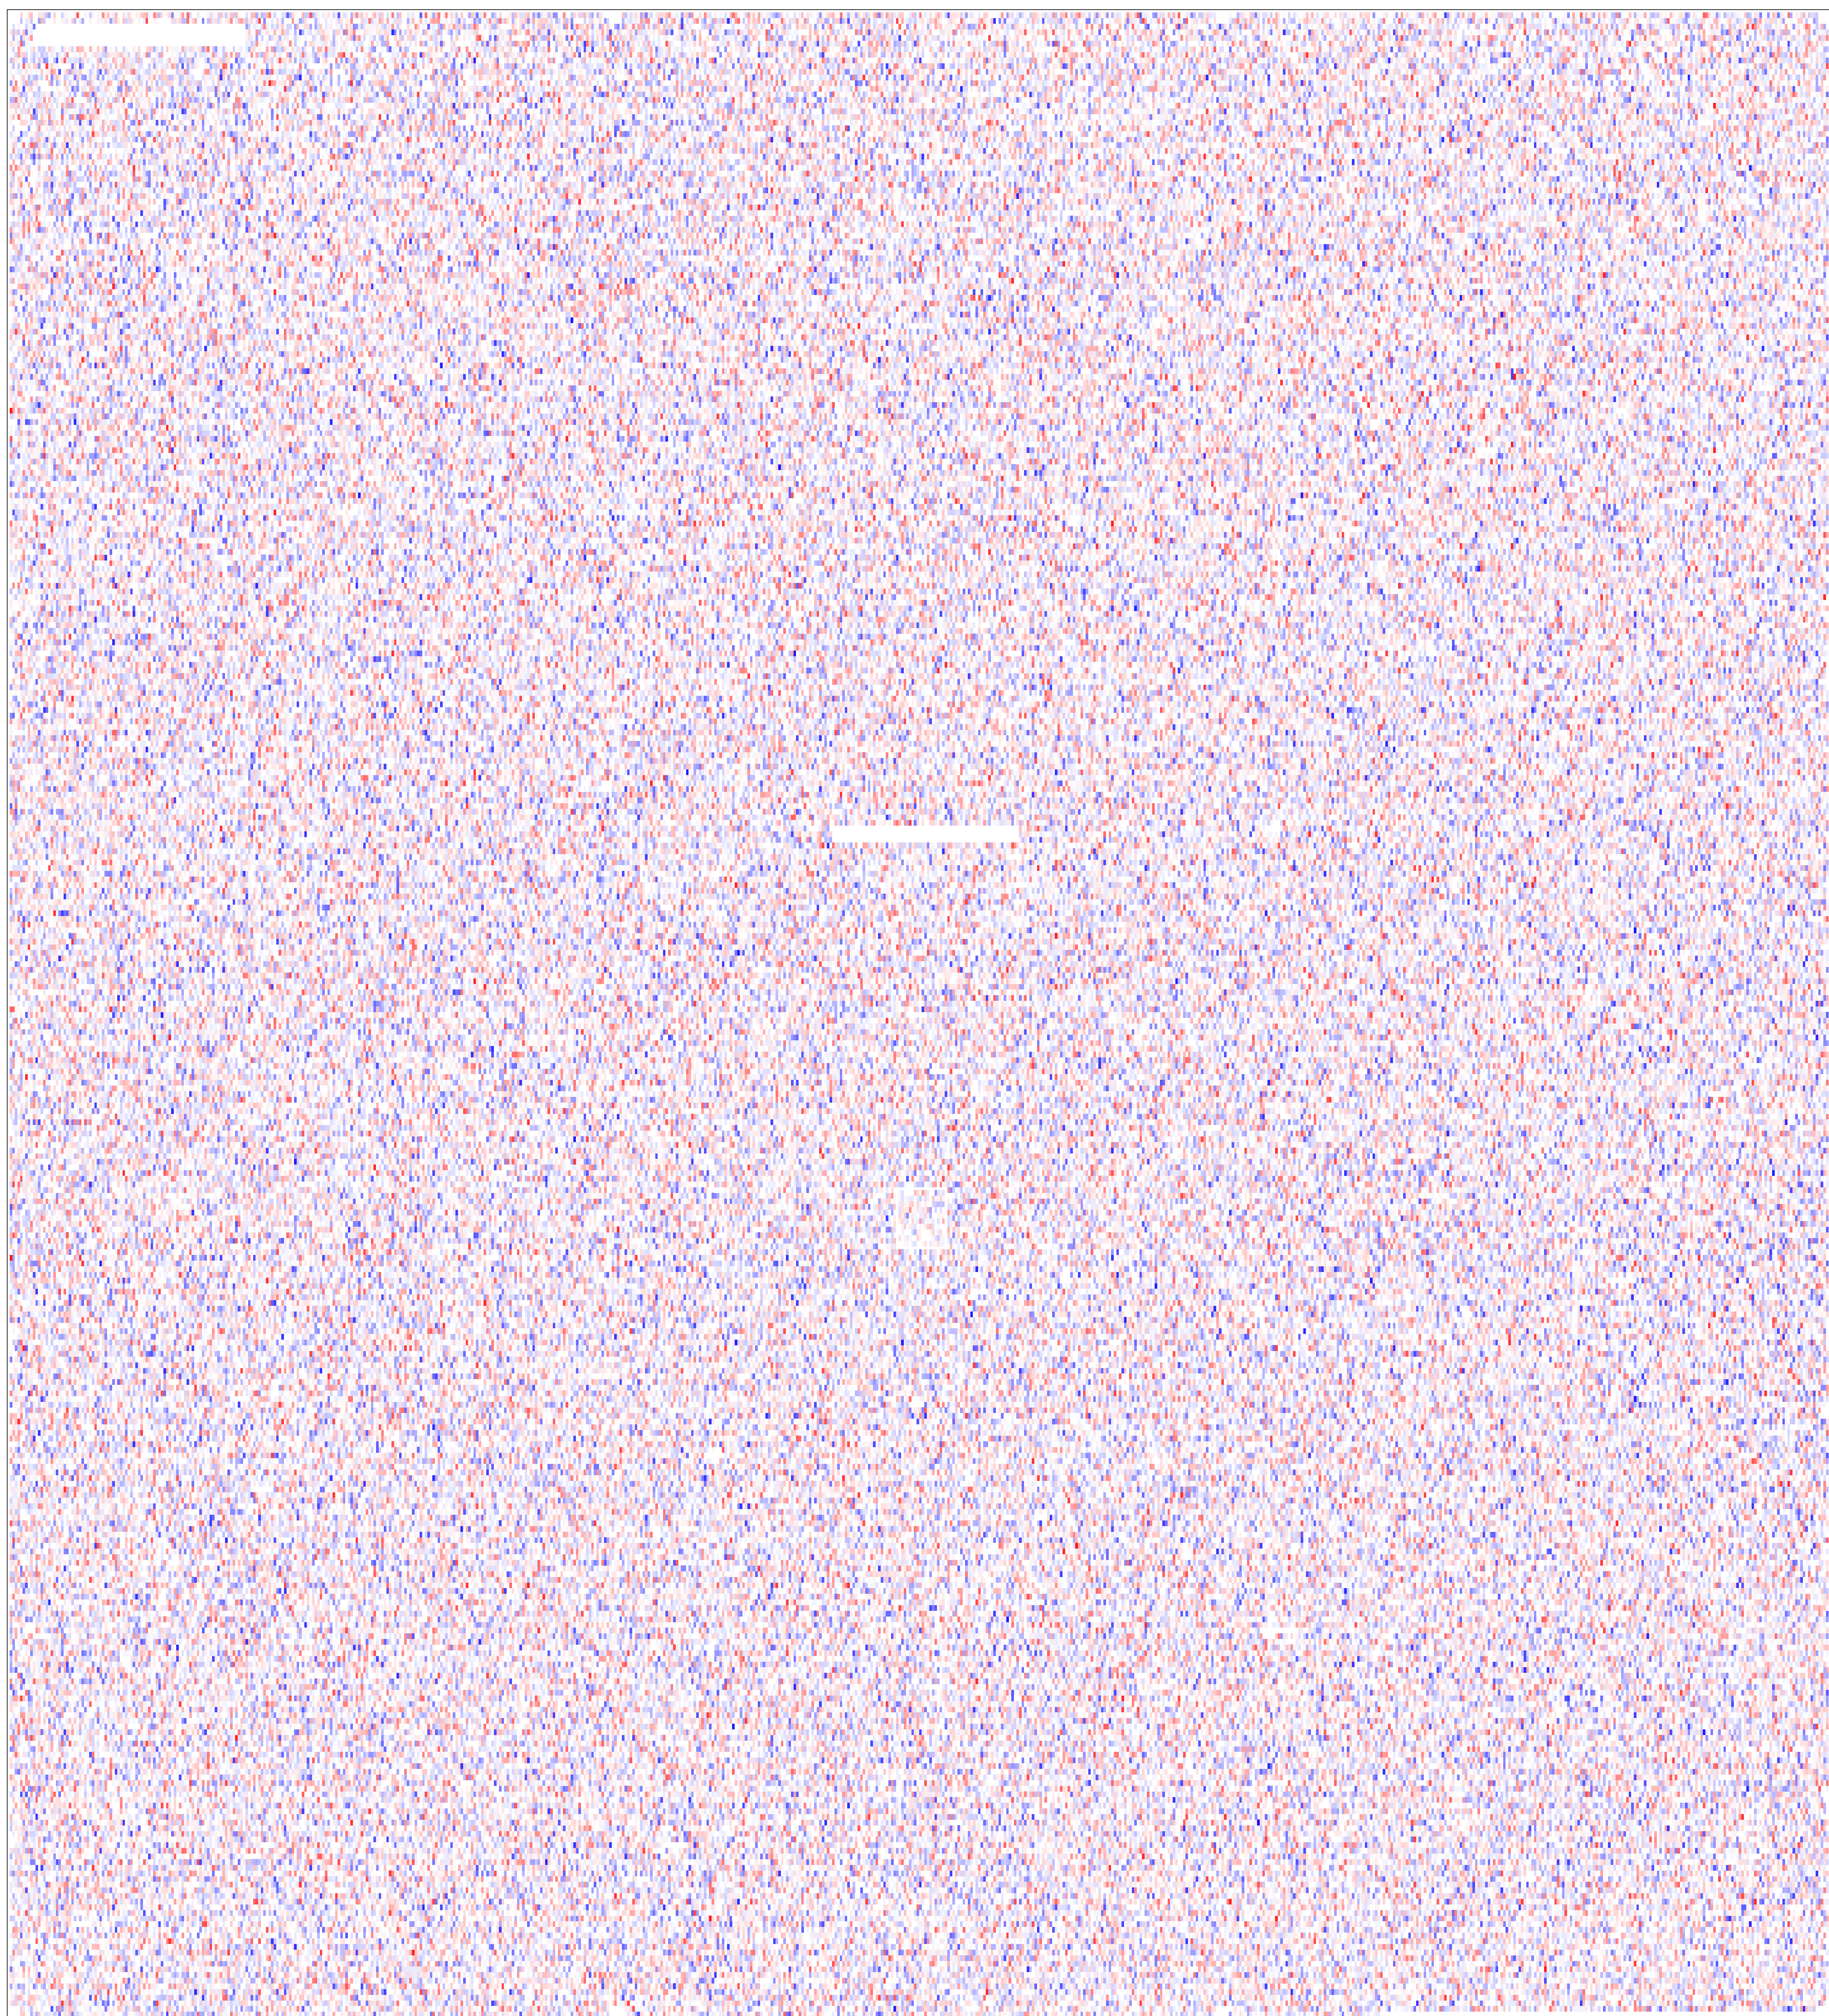

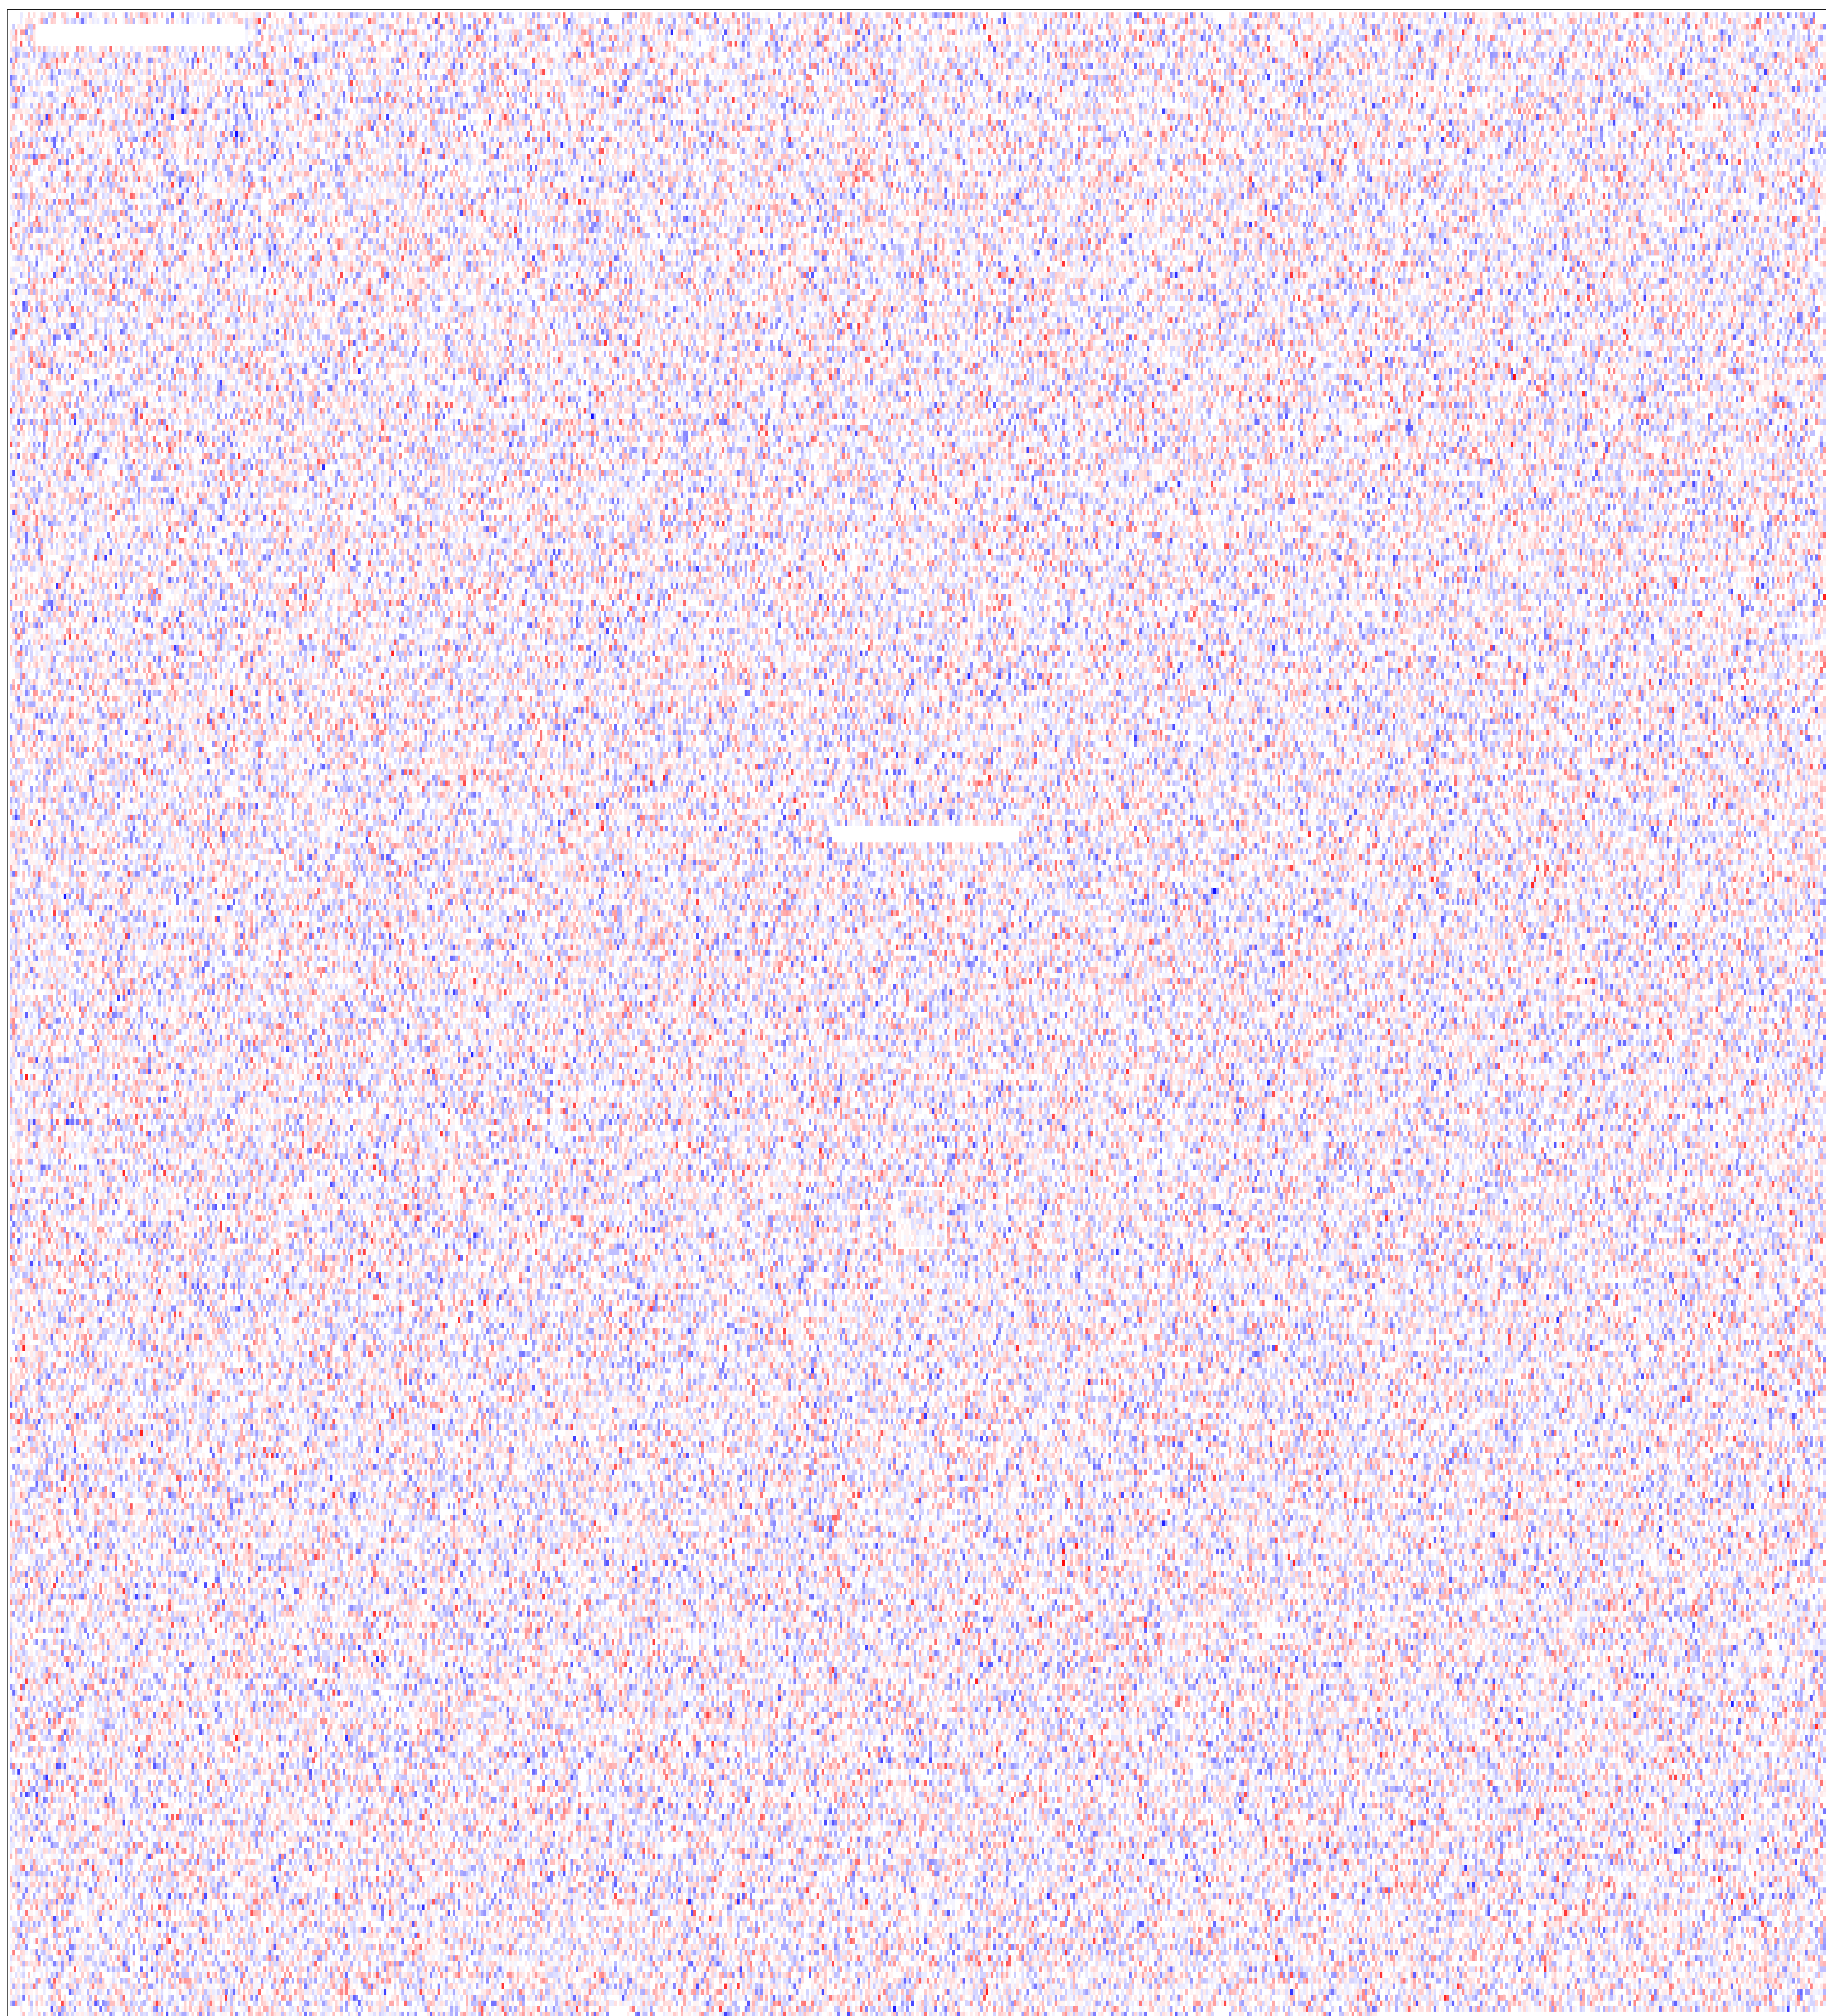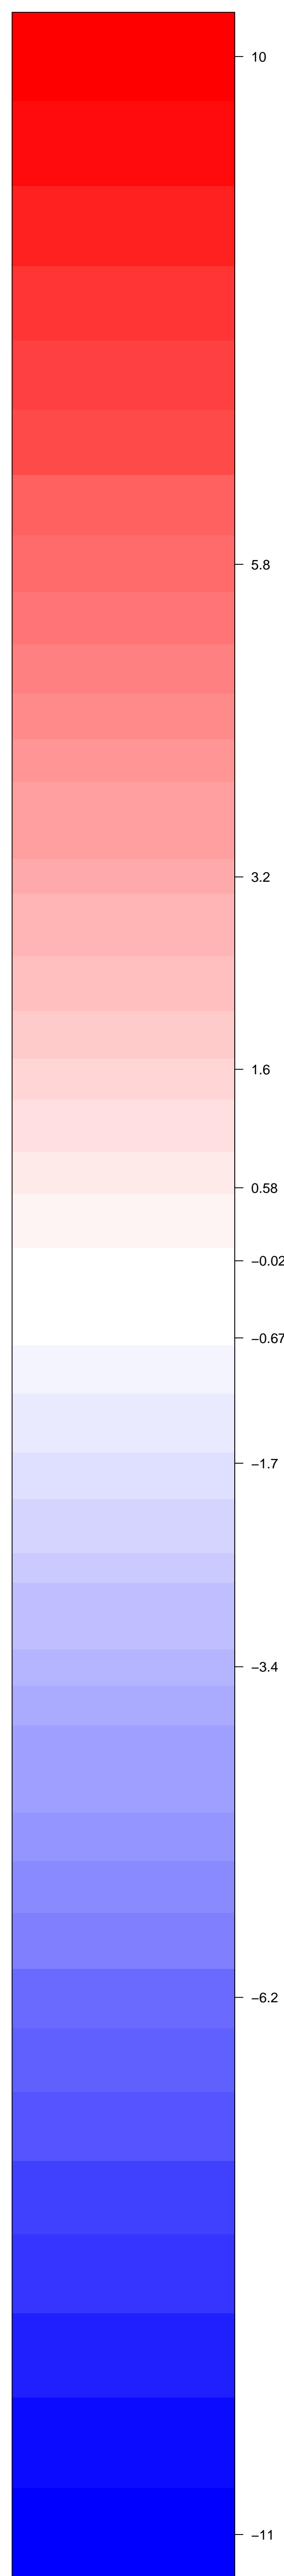

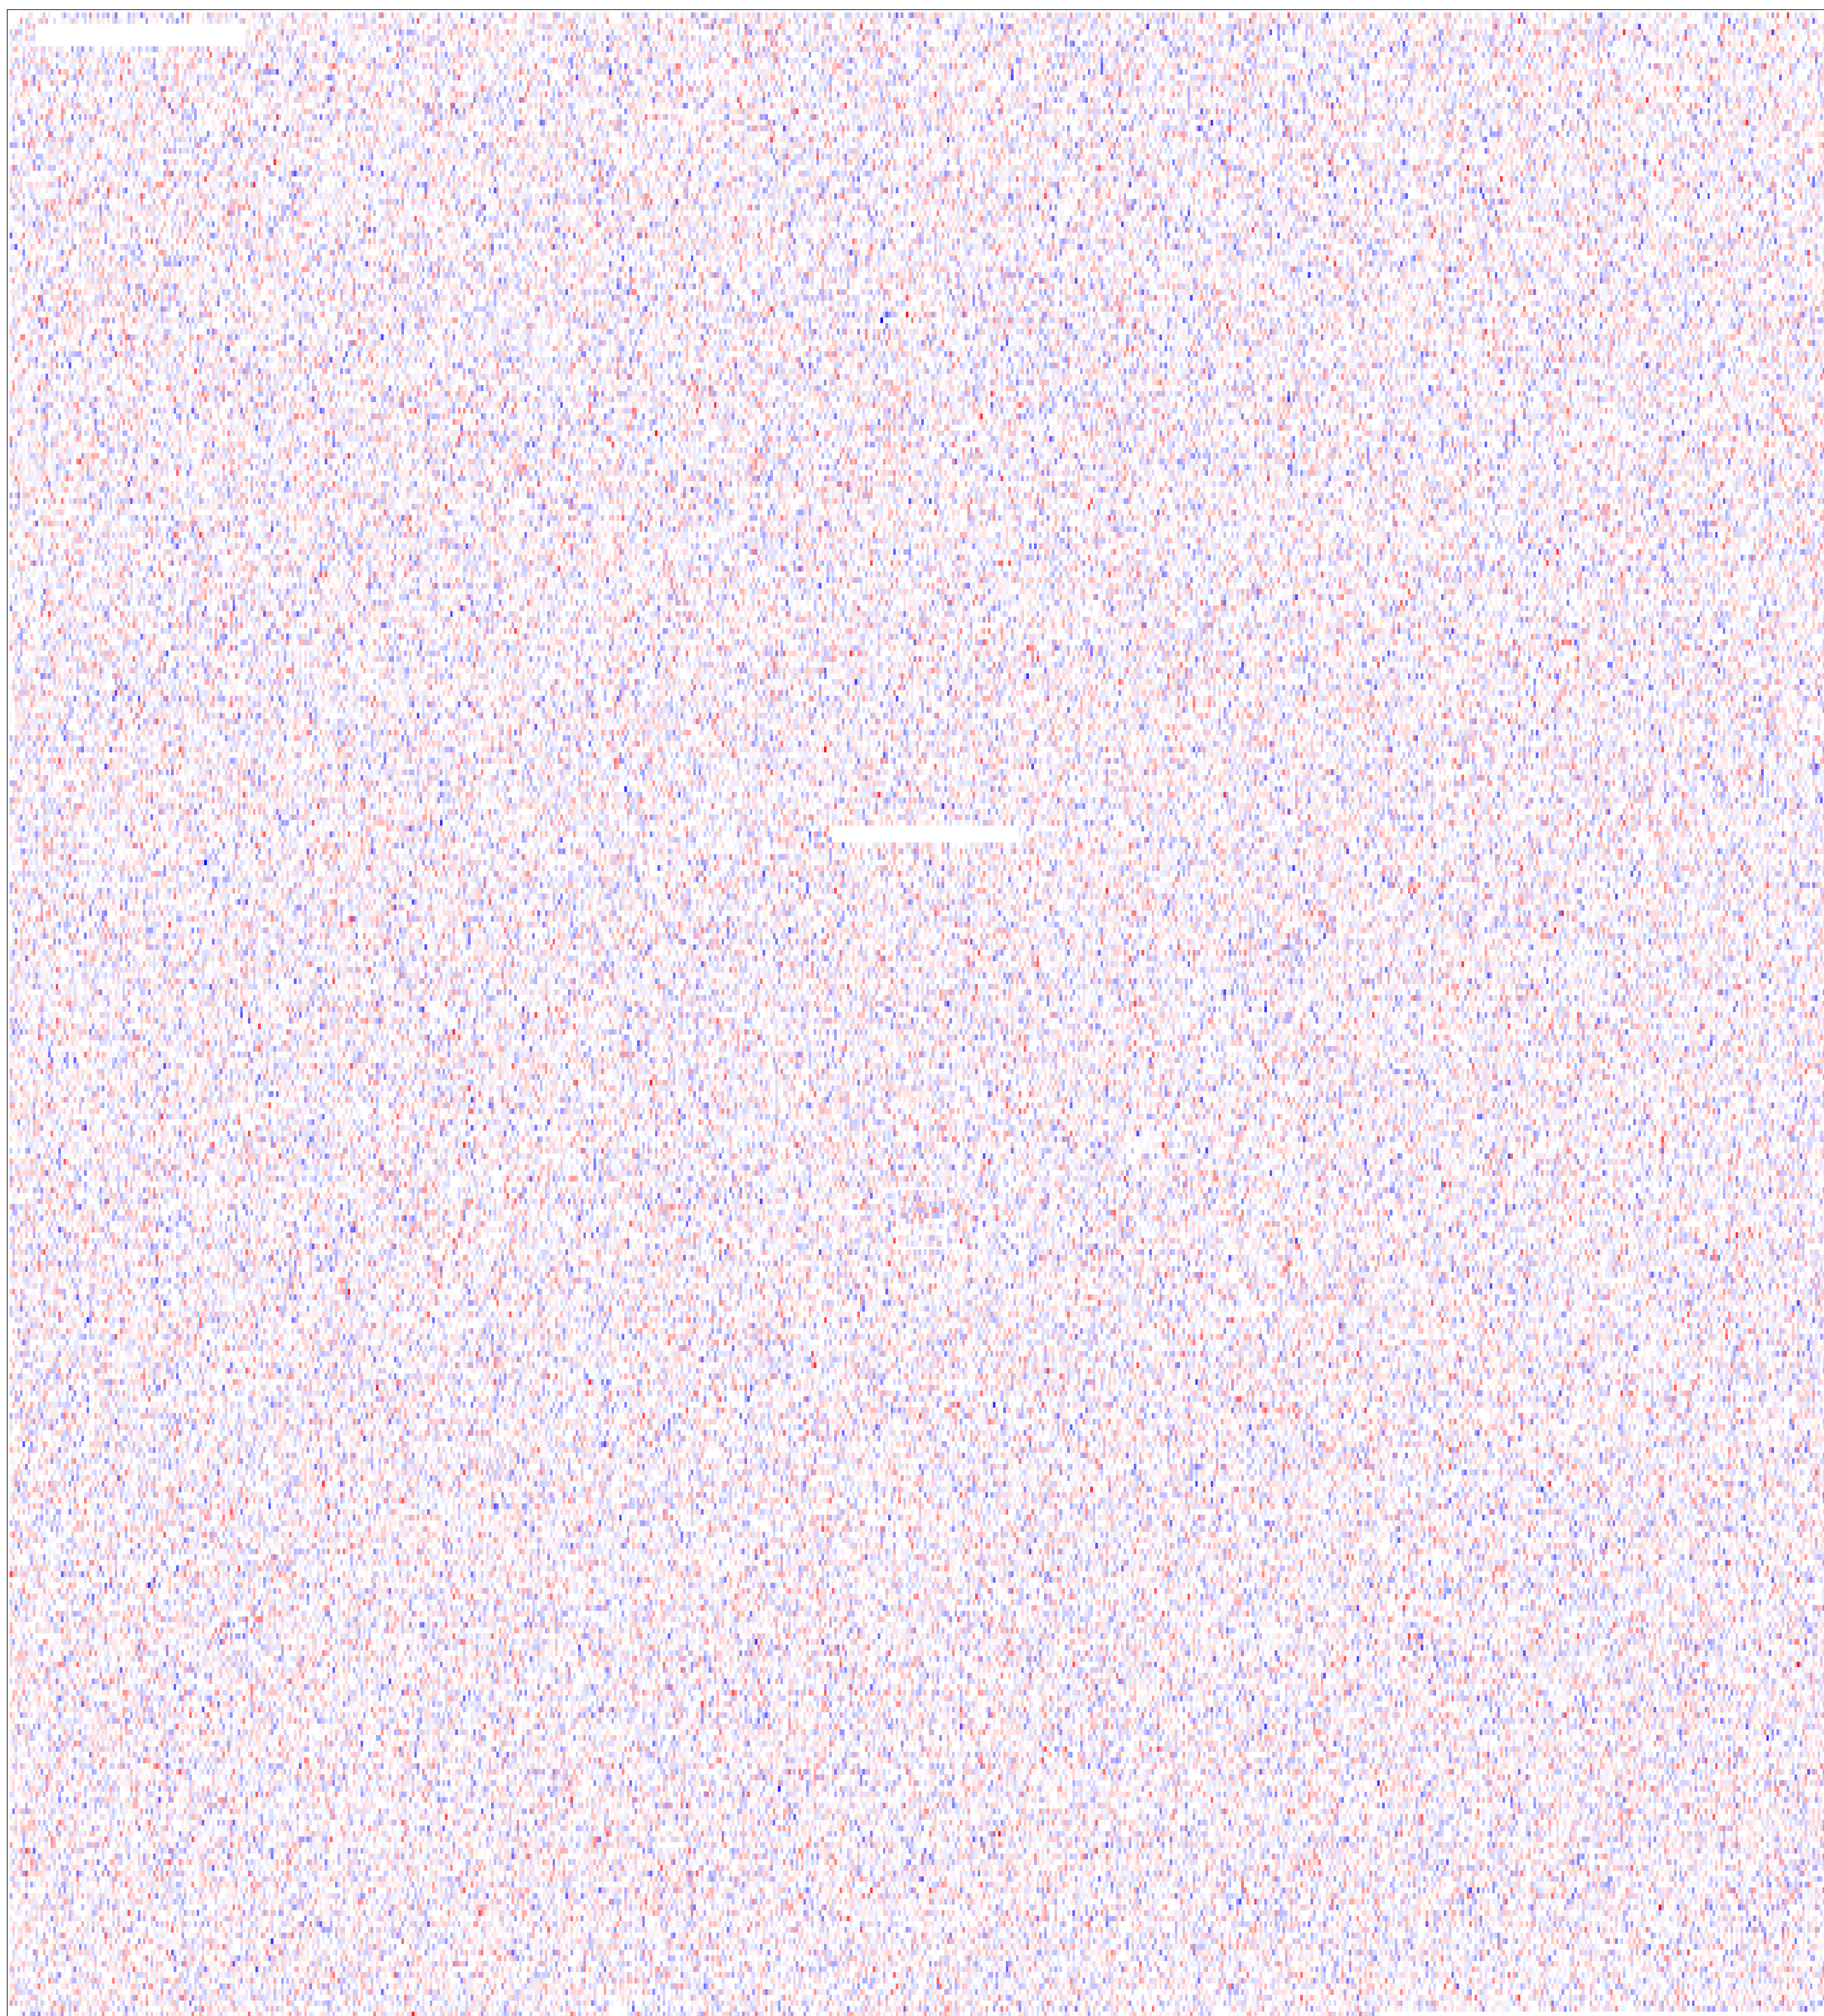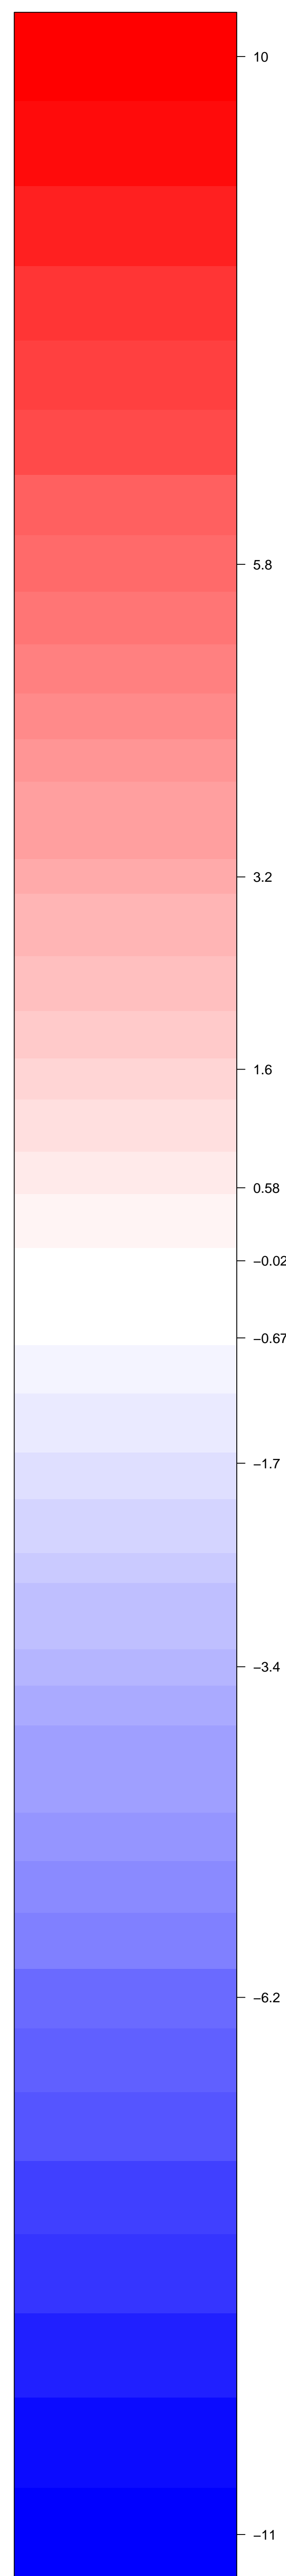

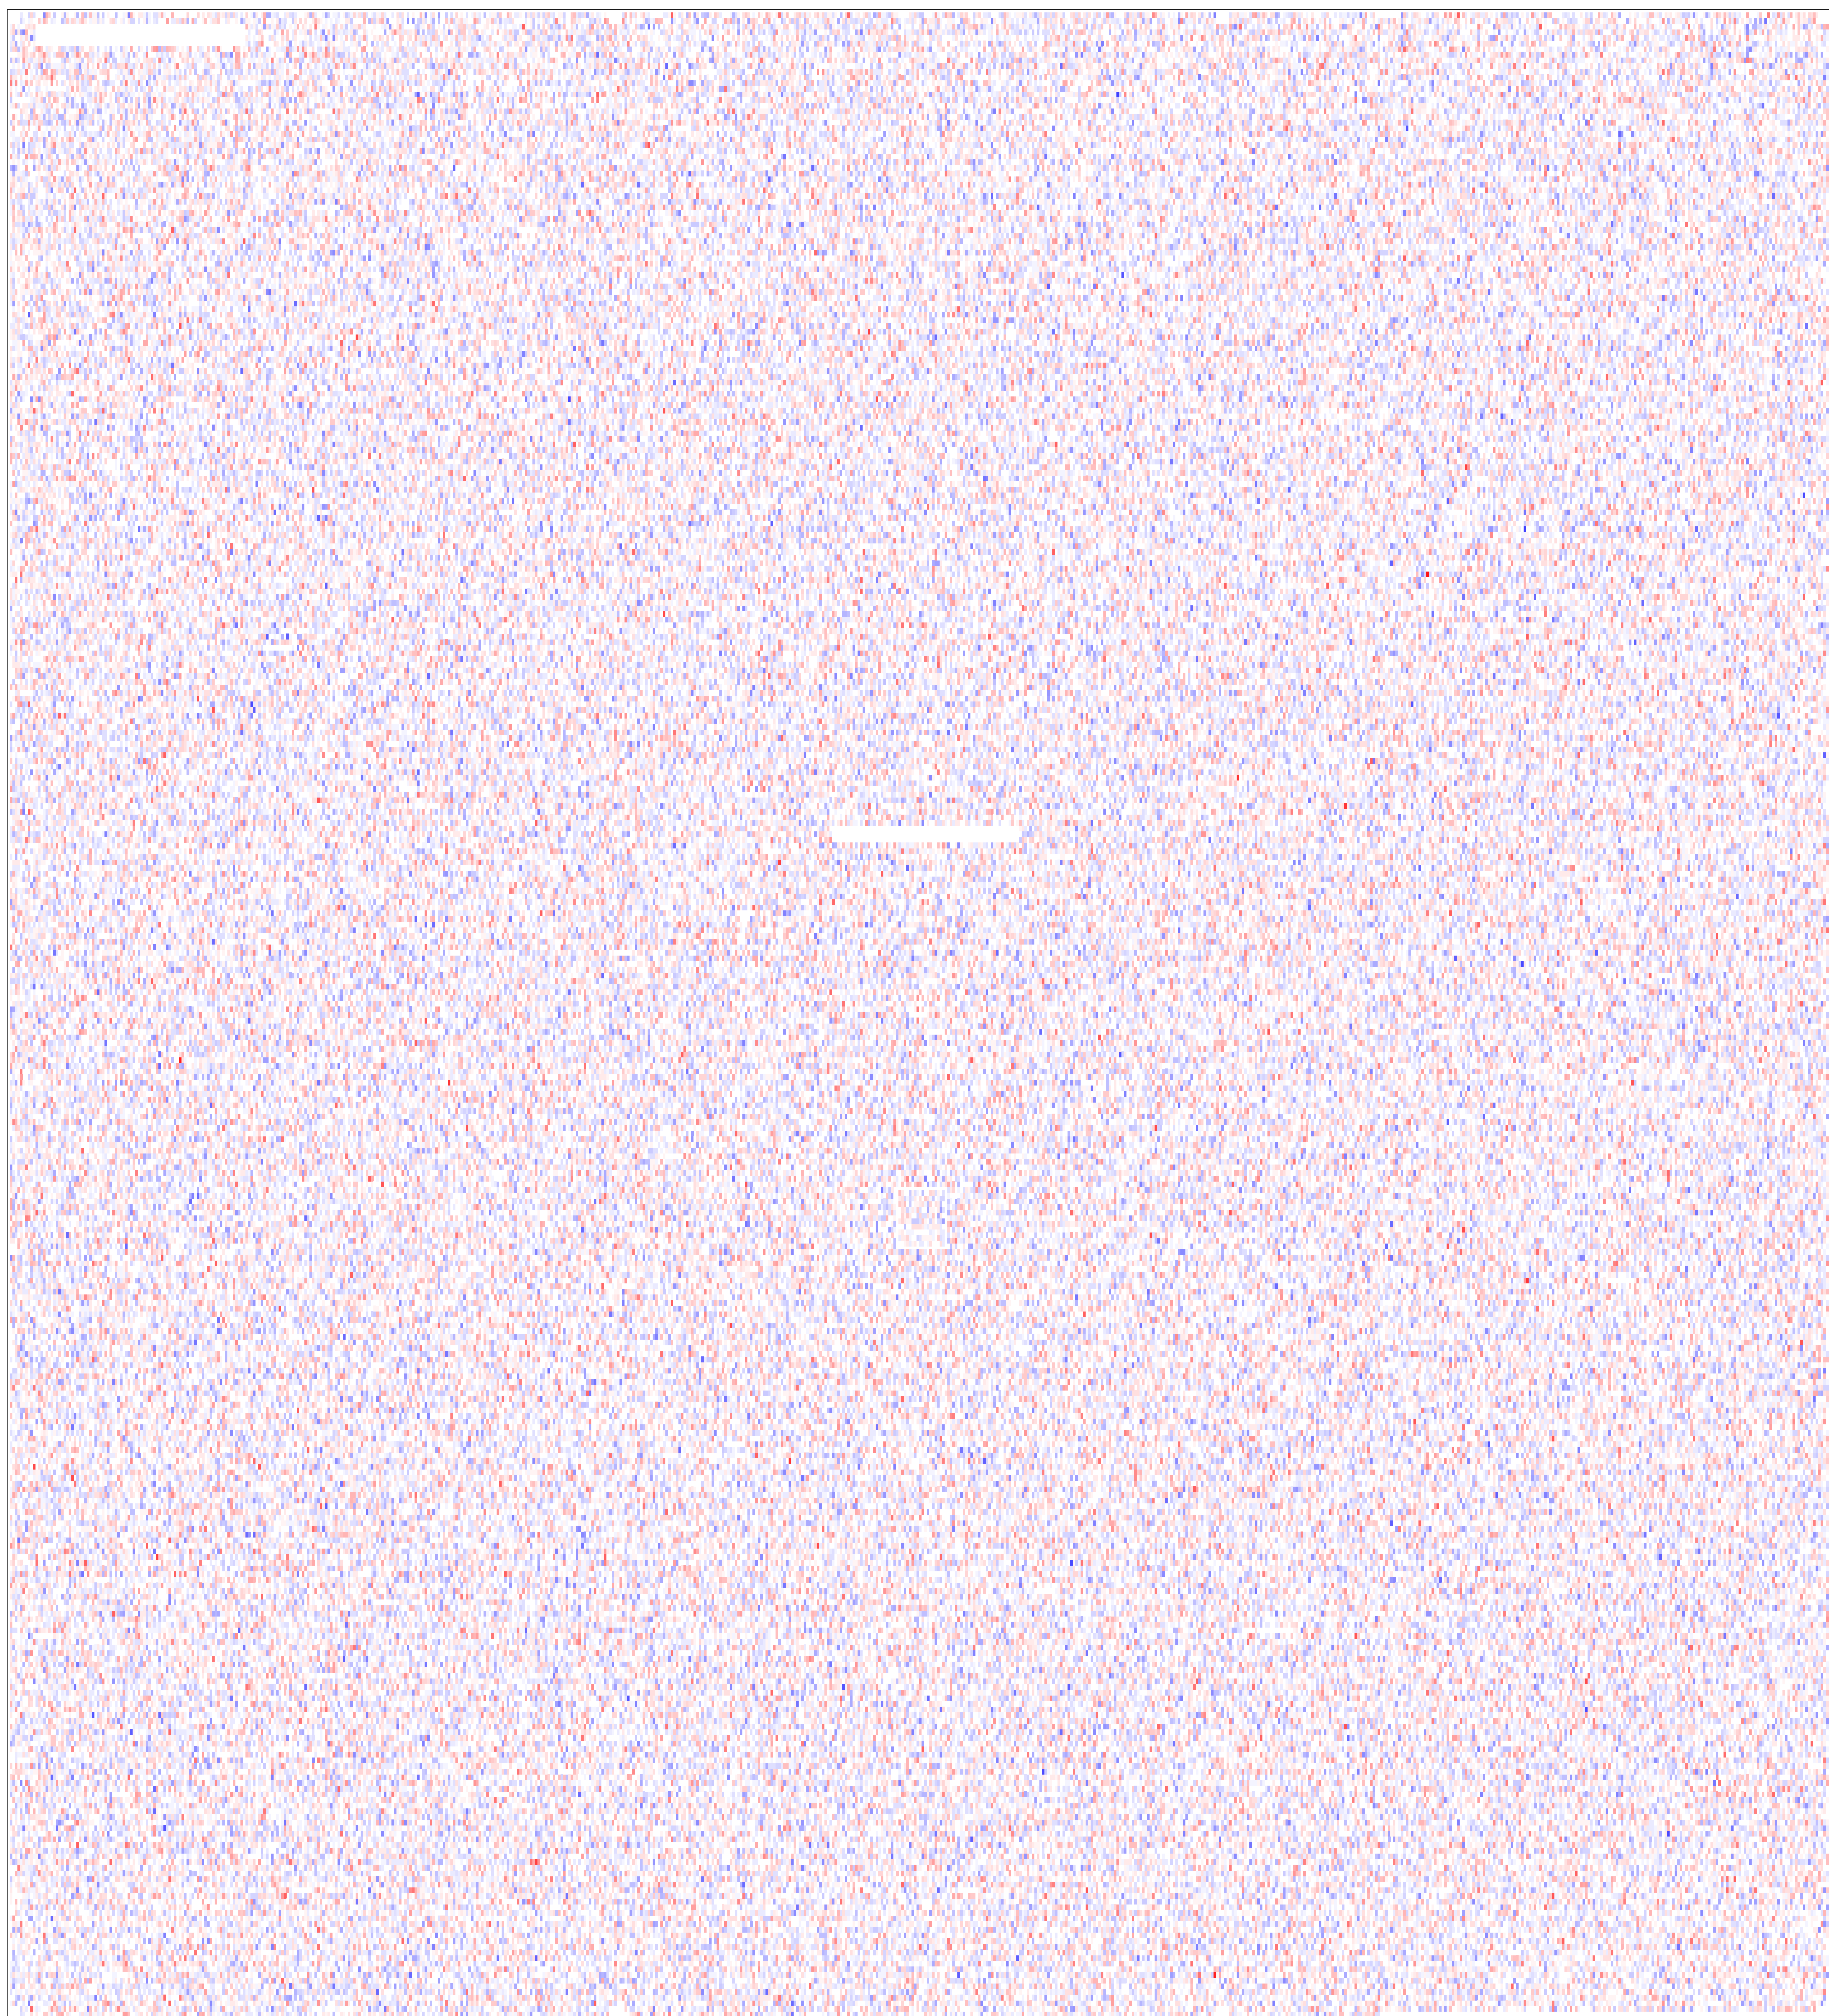



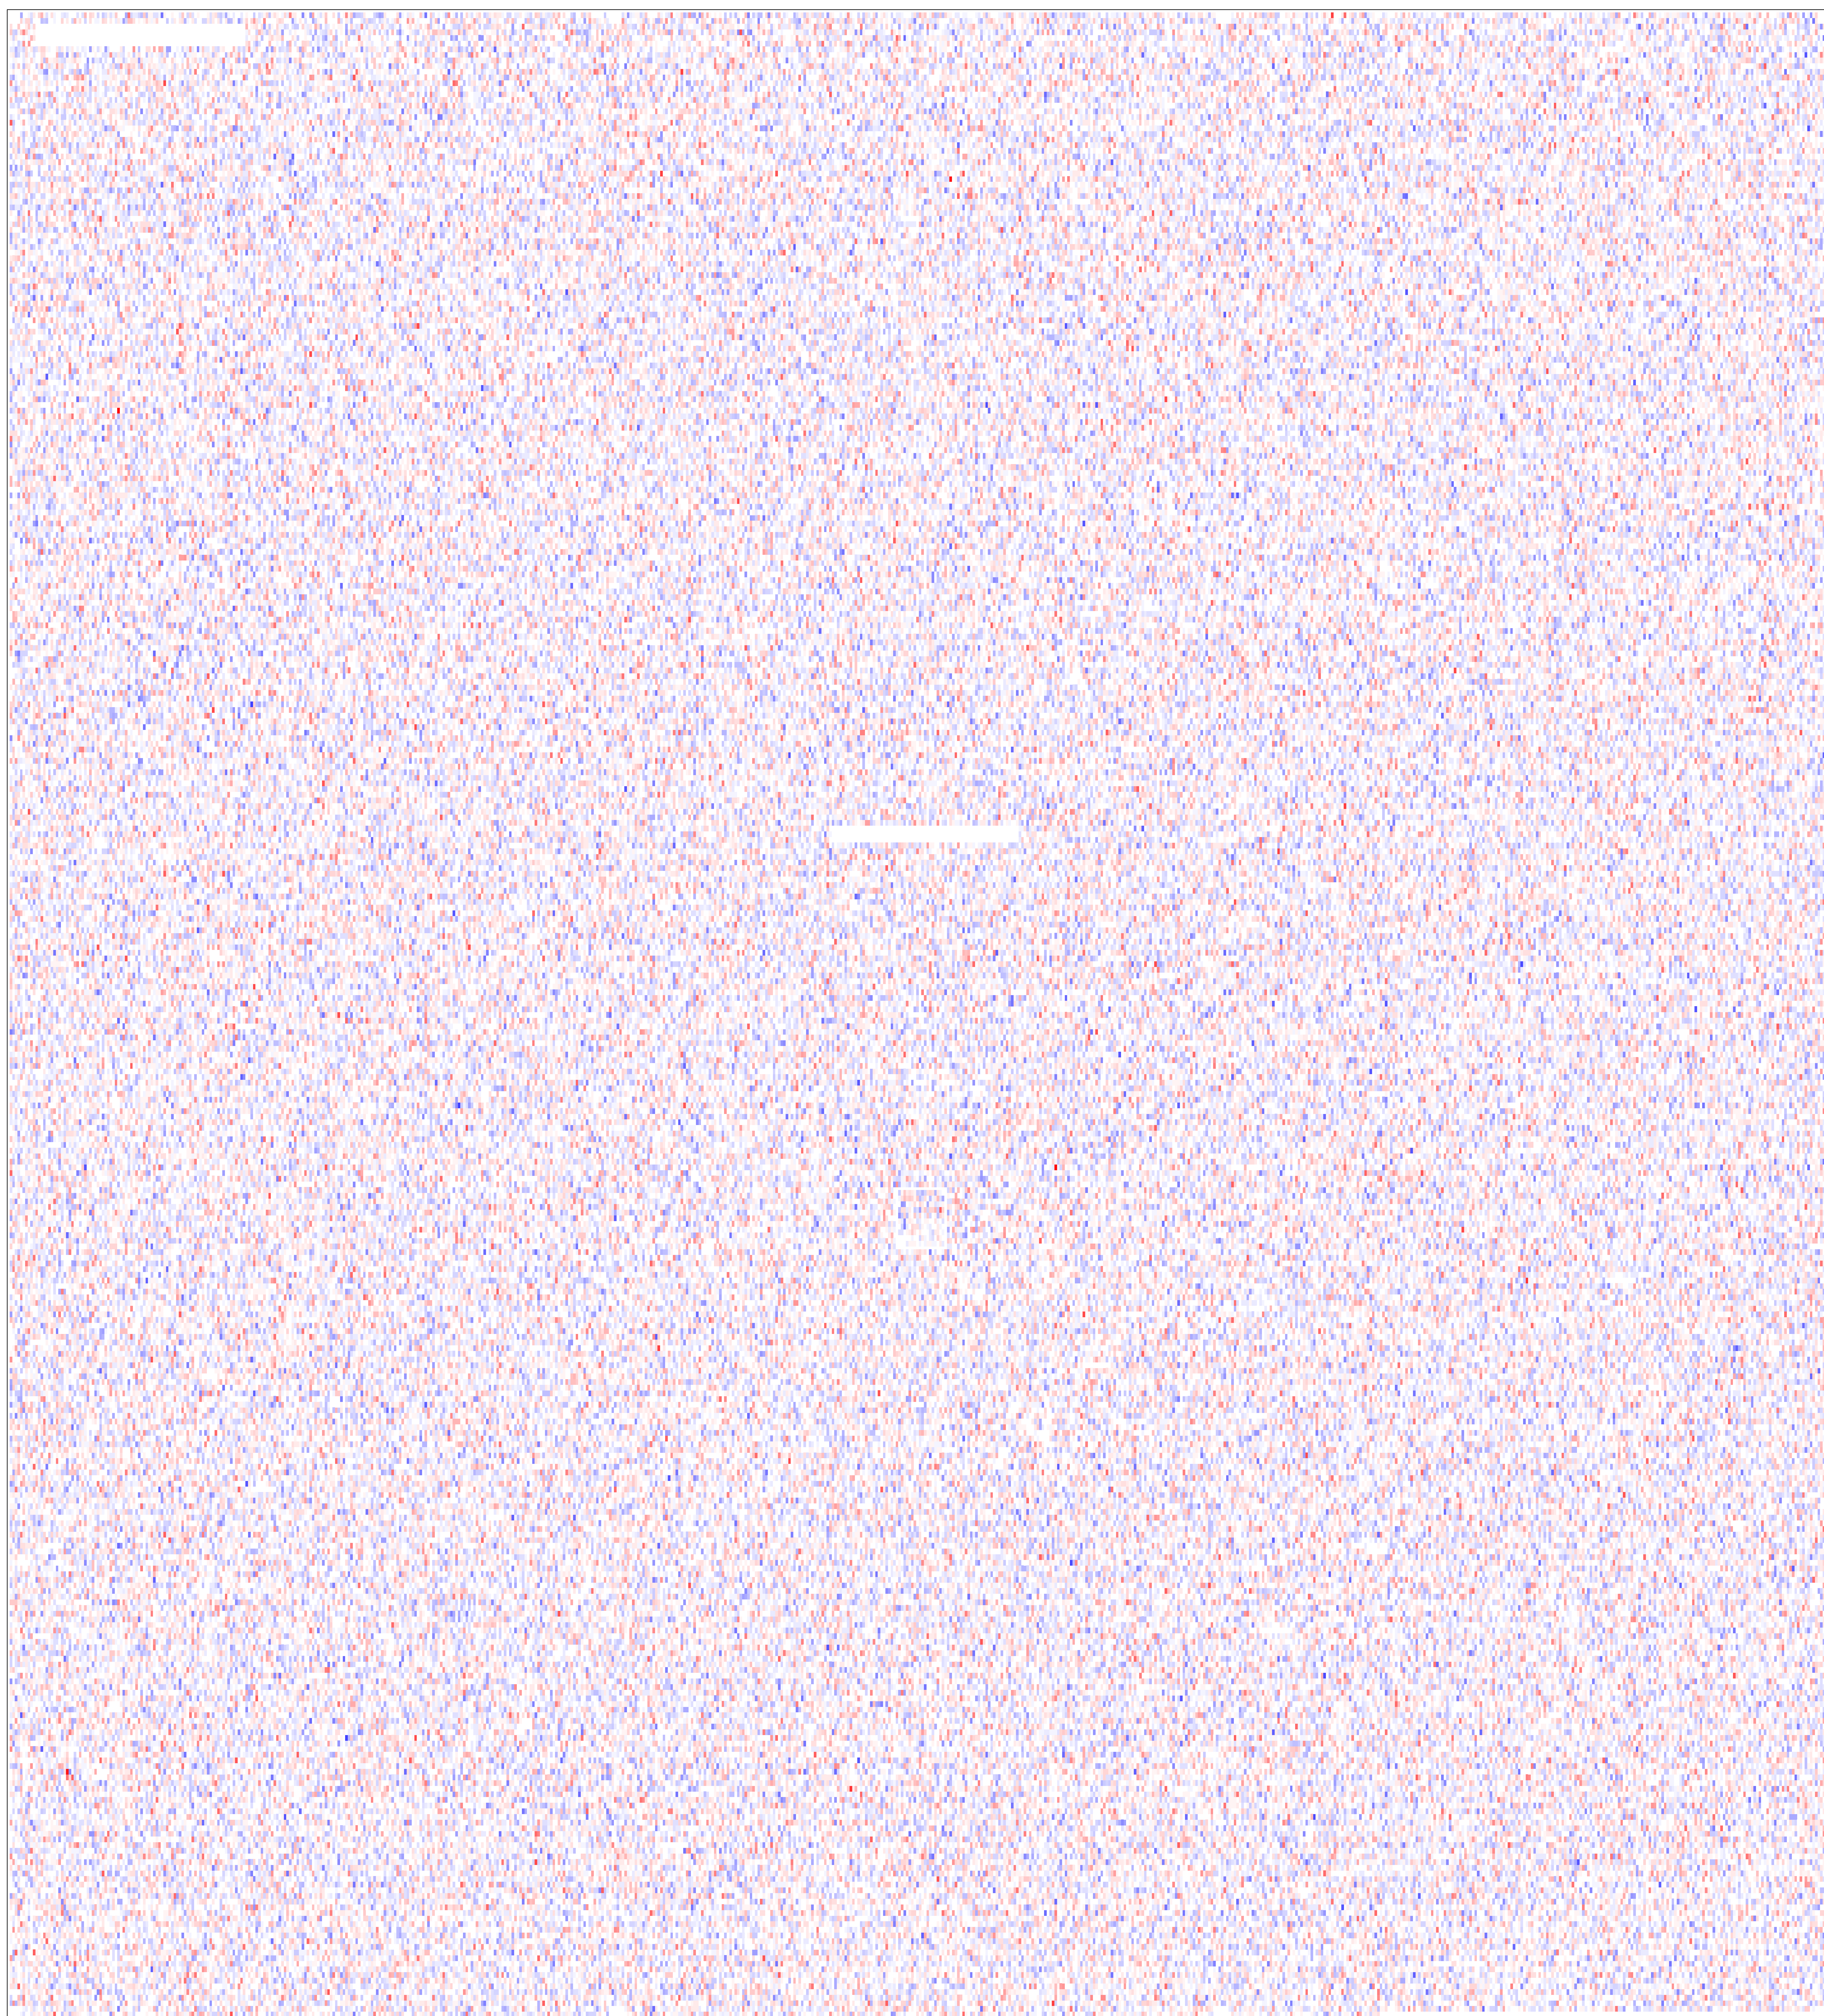

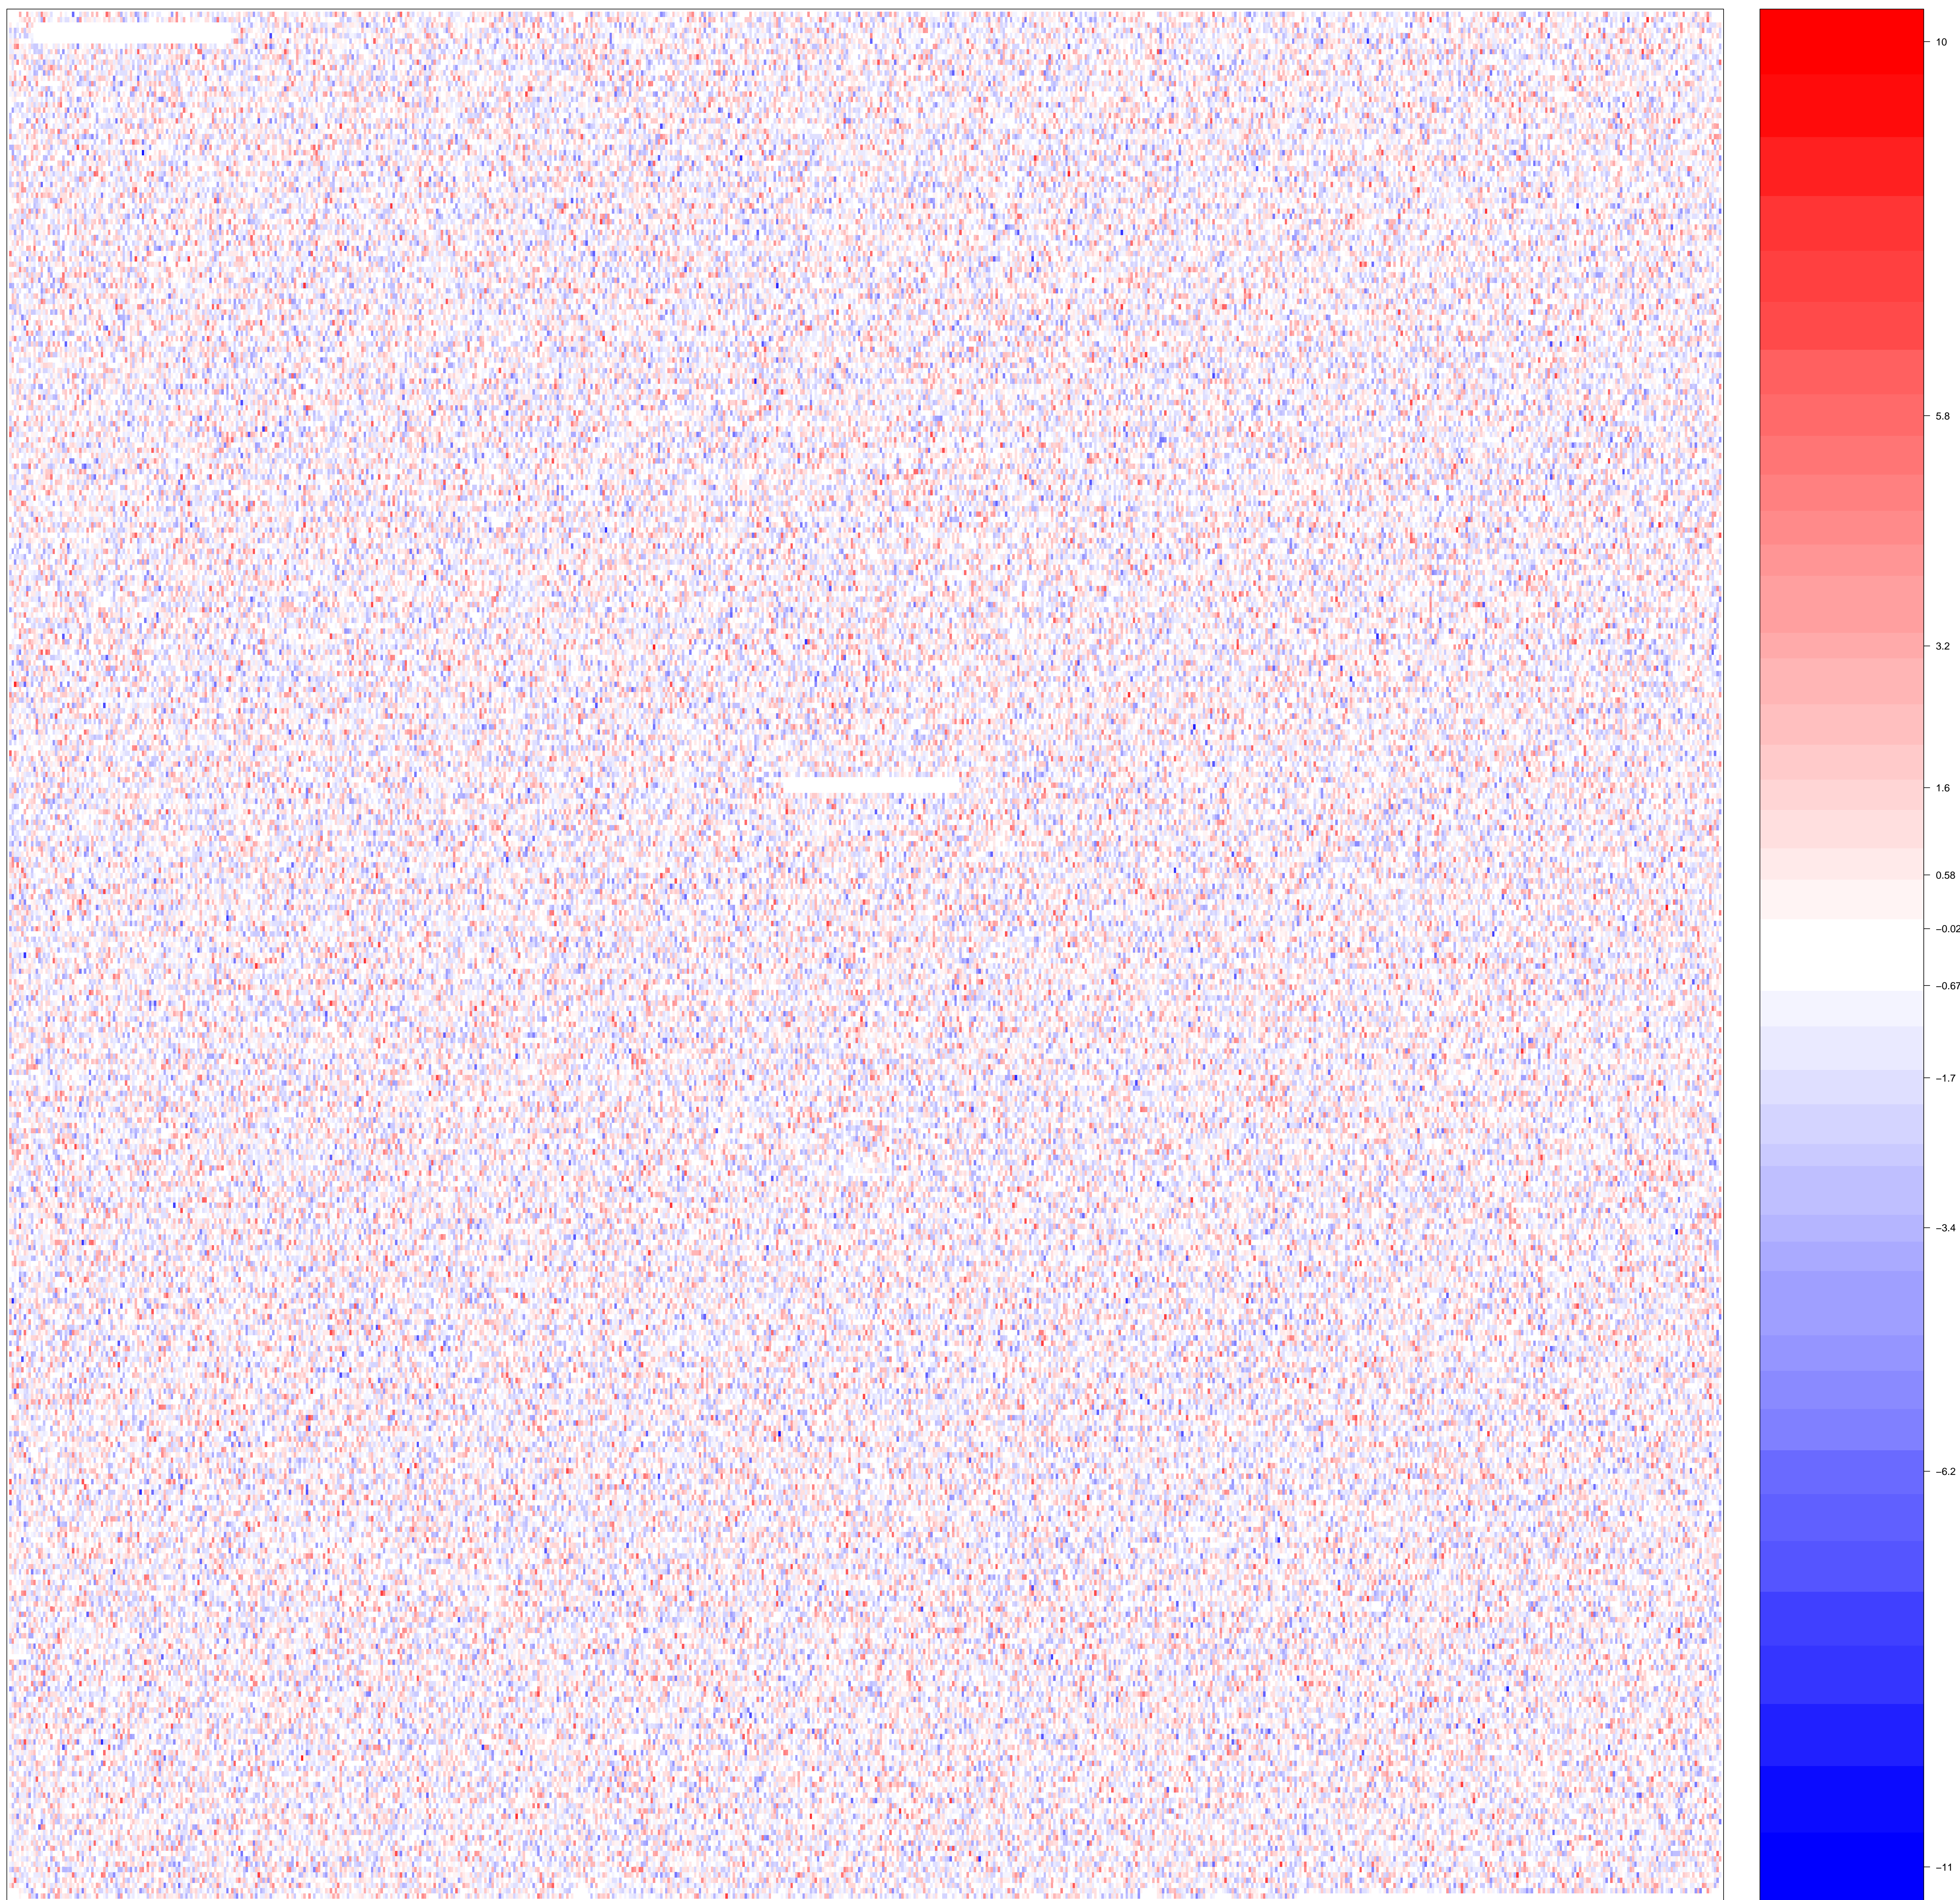

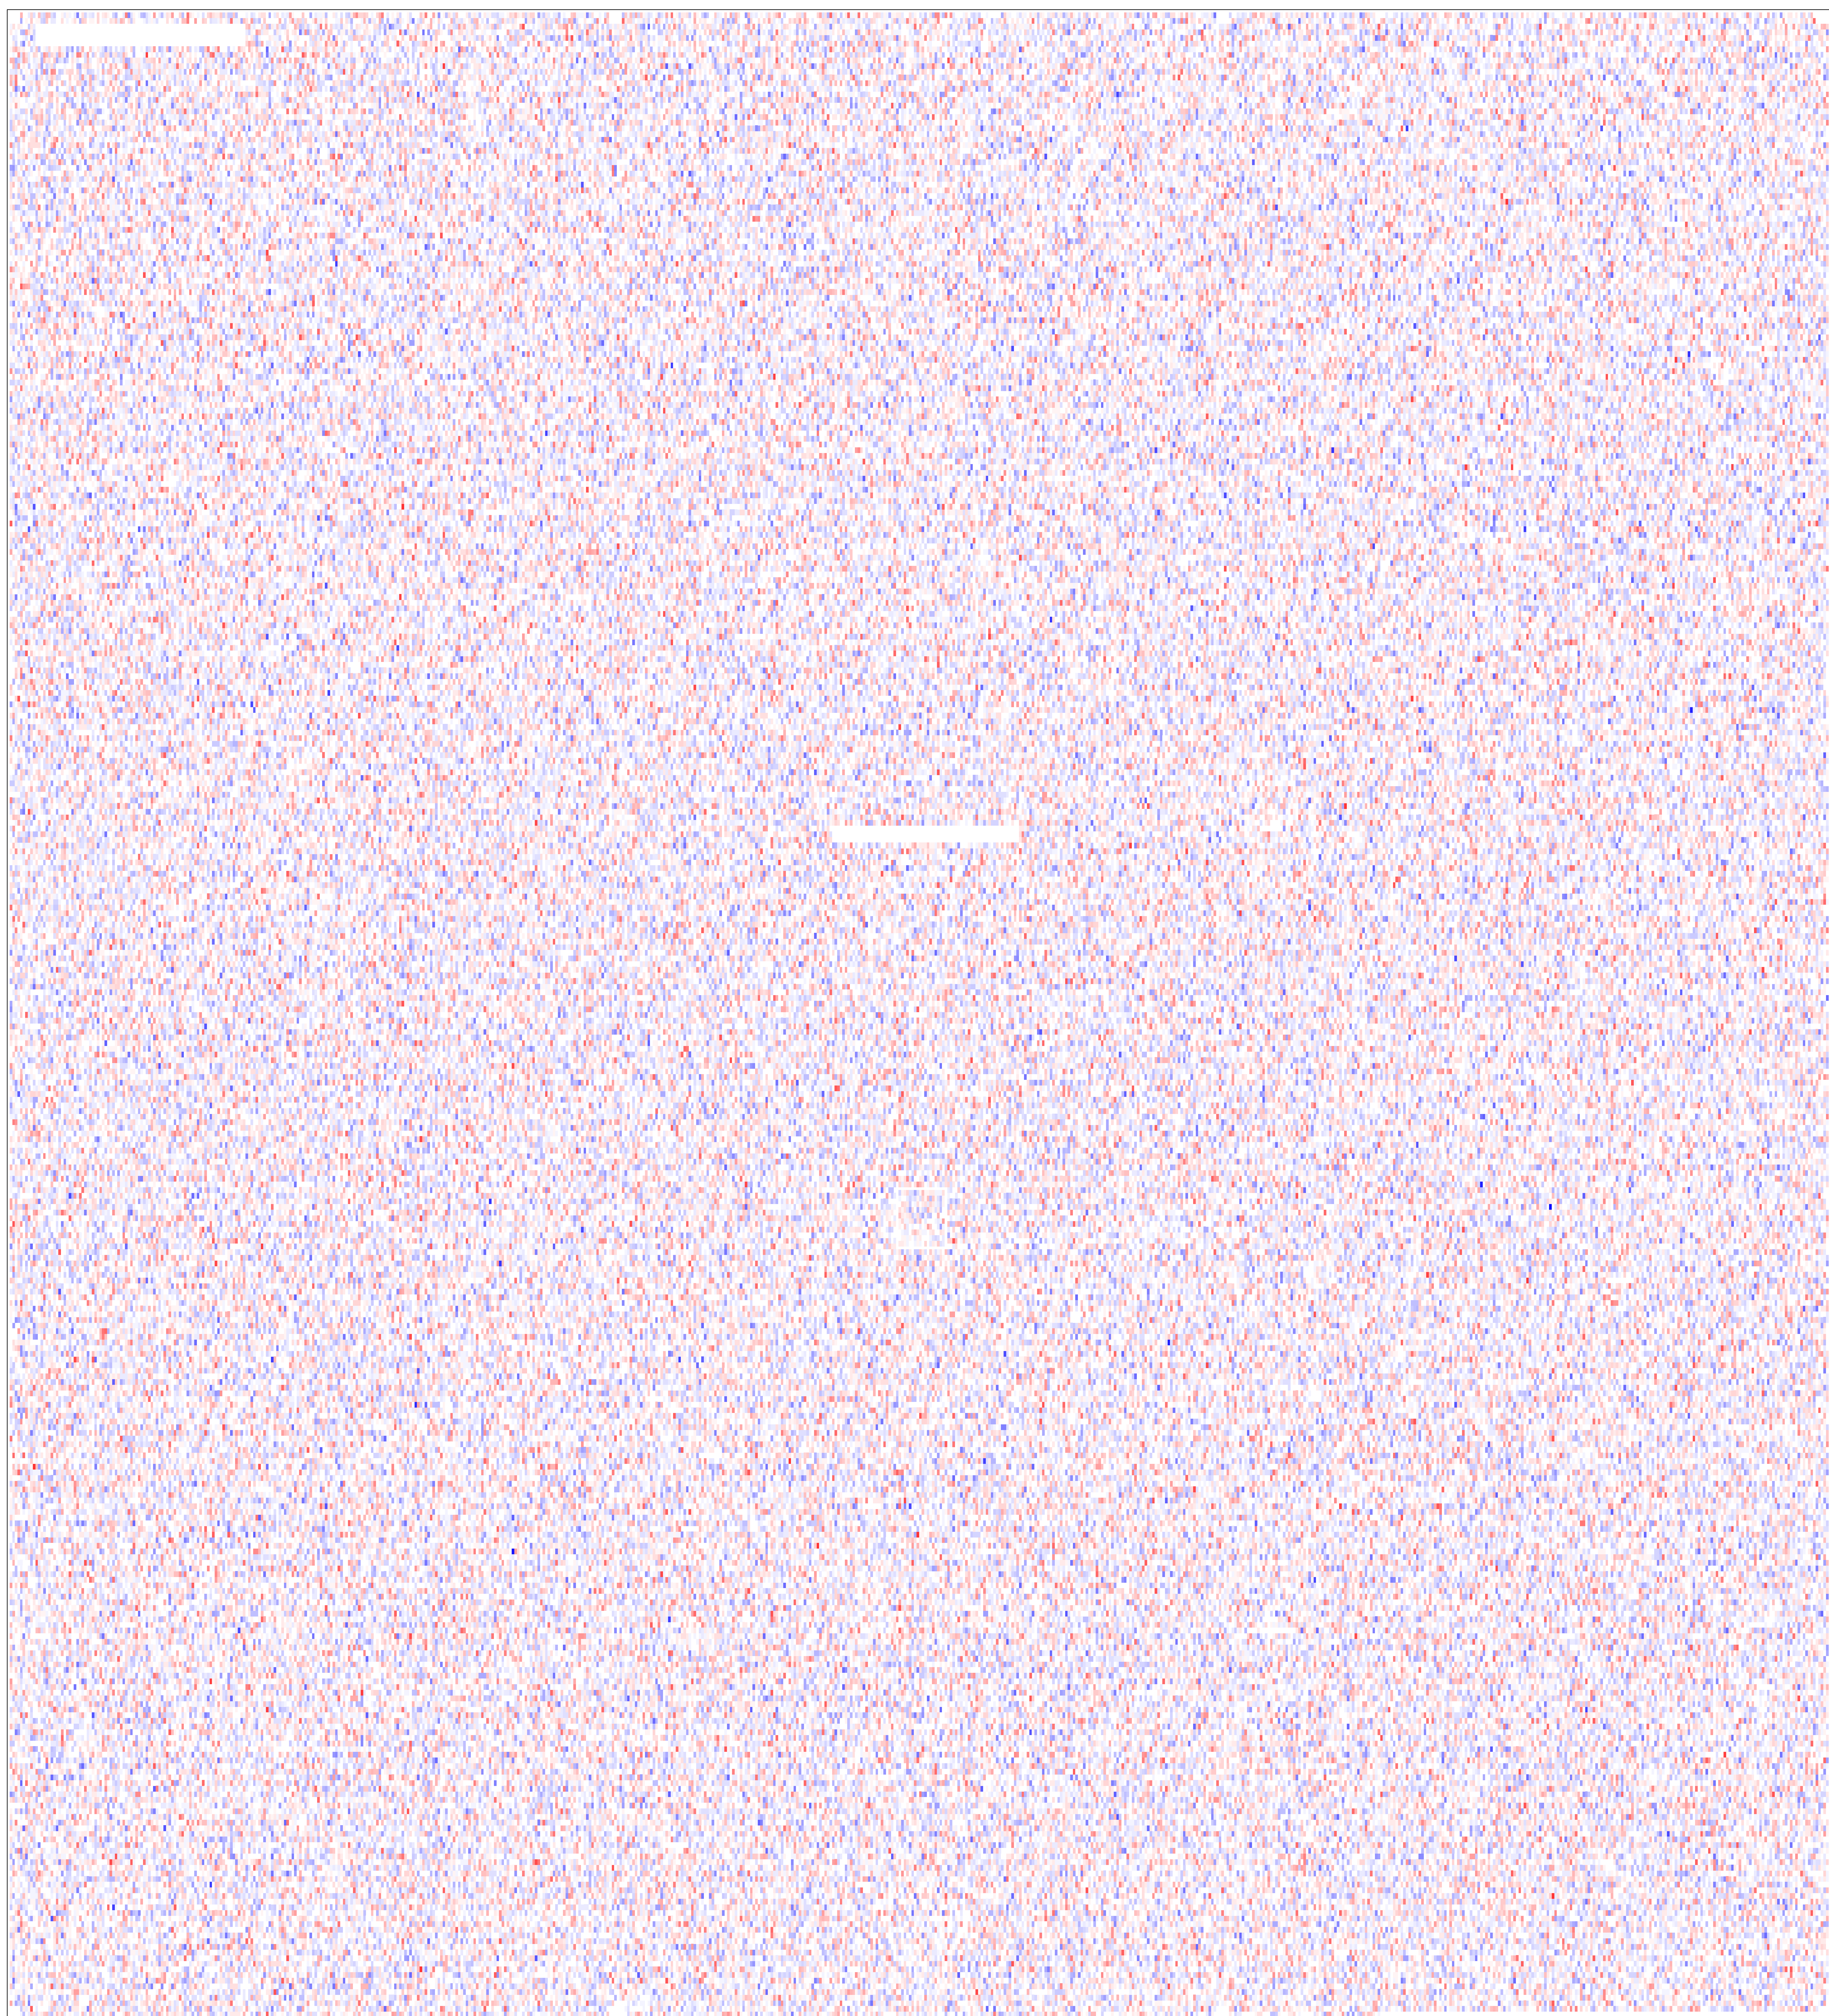

10

5.8

3.2

1.6

0.58

-0.02

-0.67

-1.7

-3.4

-6.2

-11

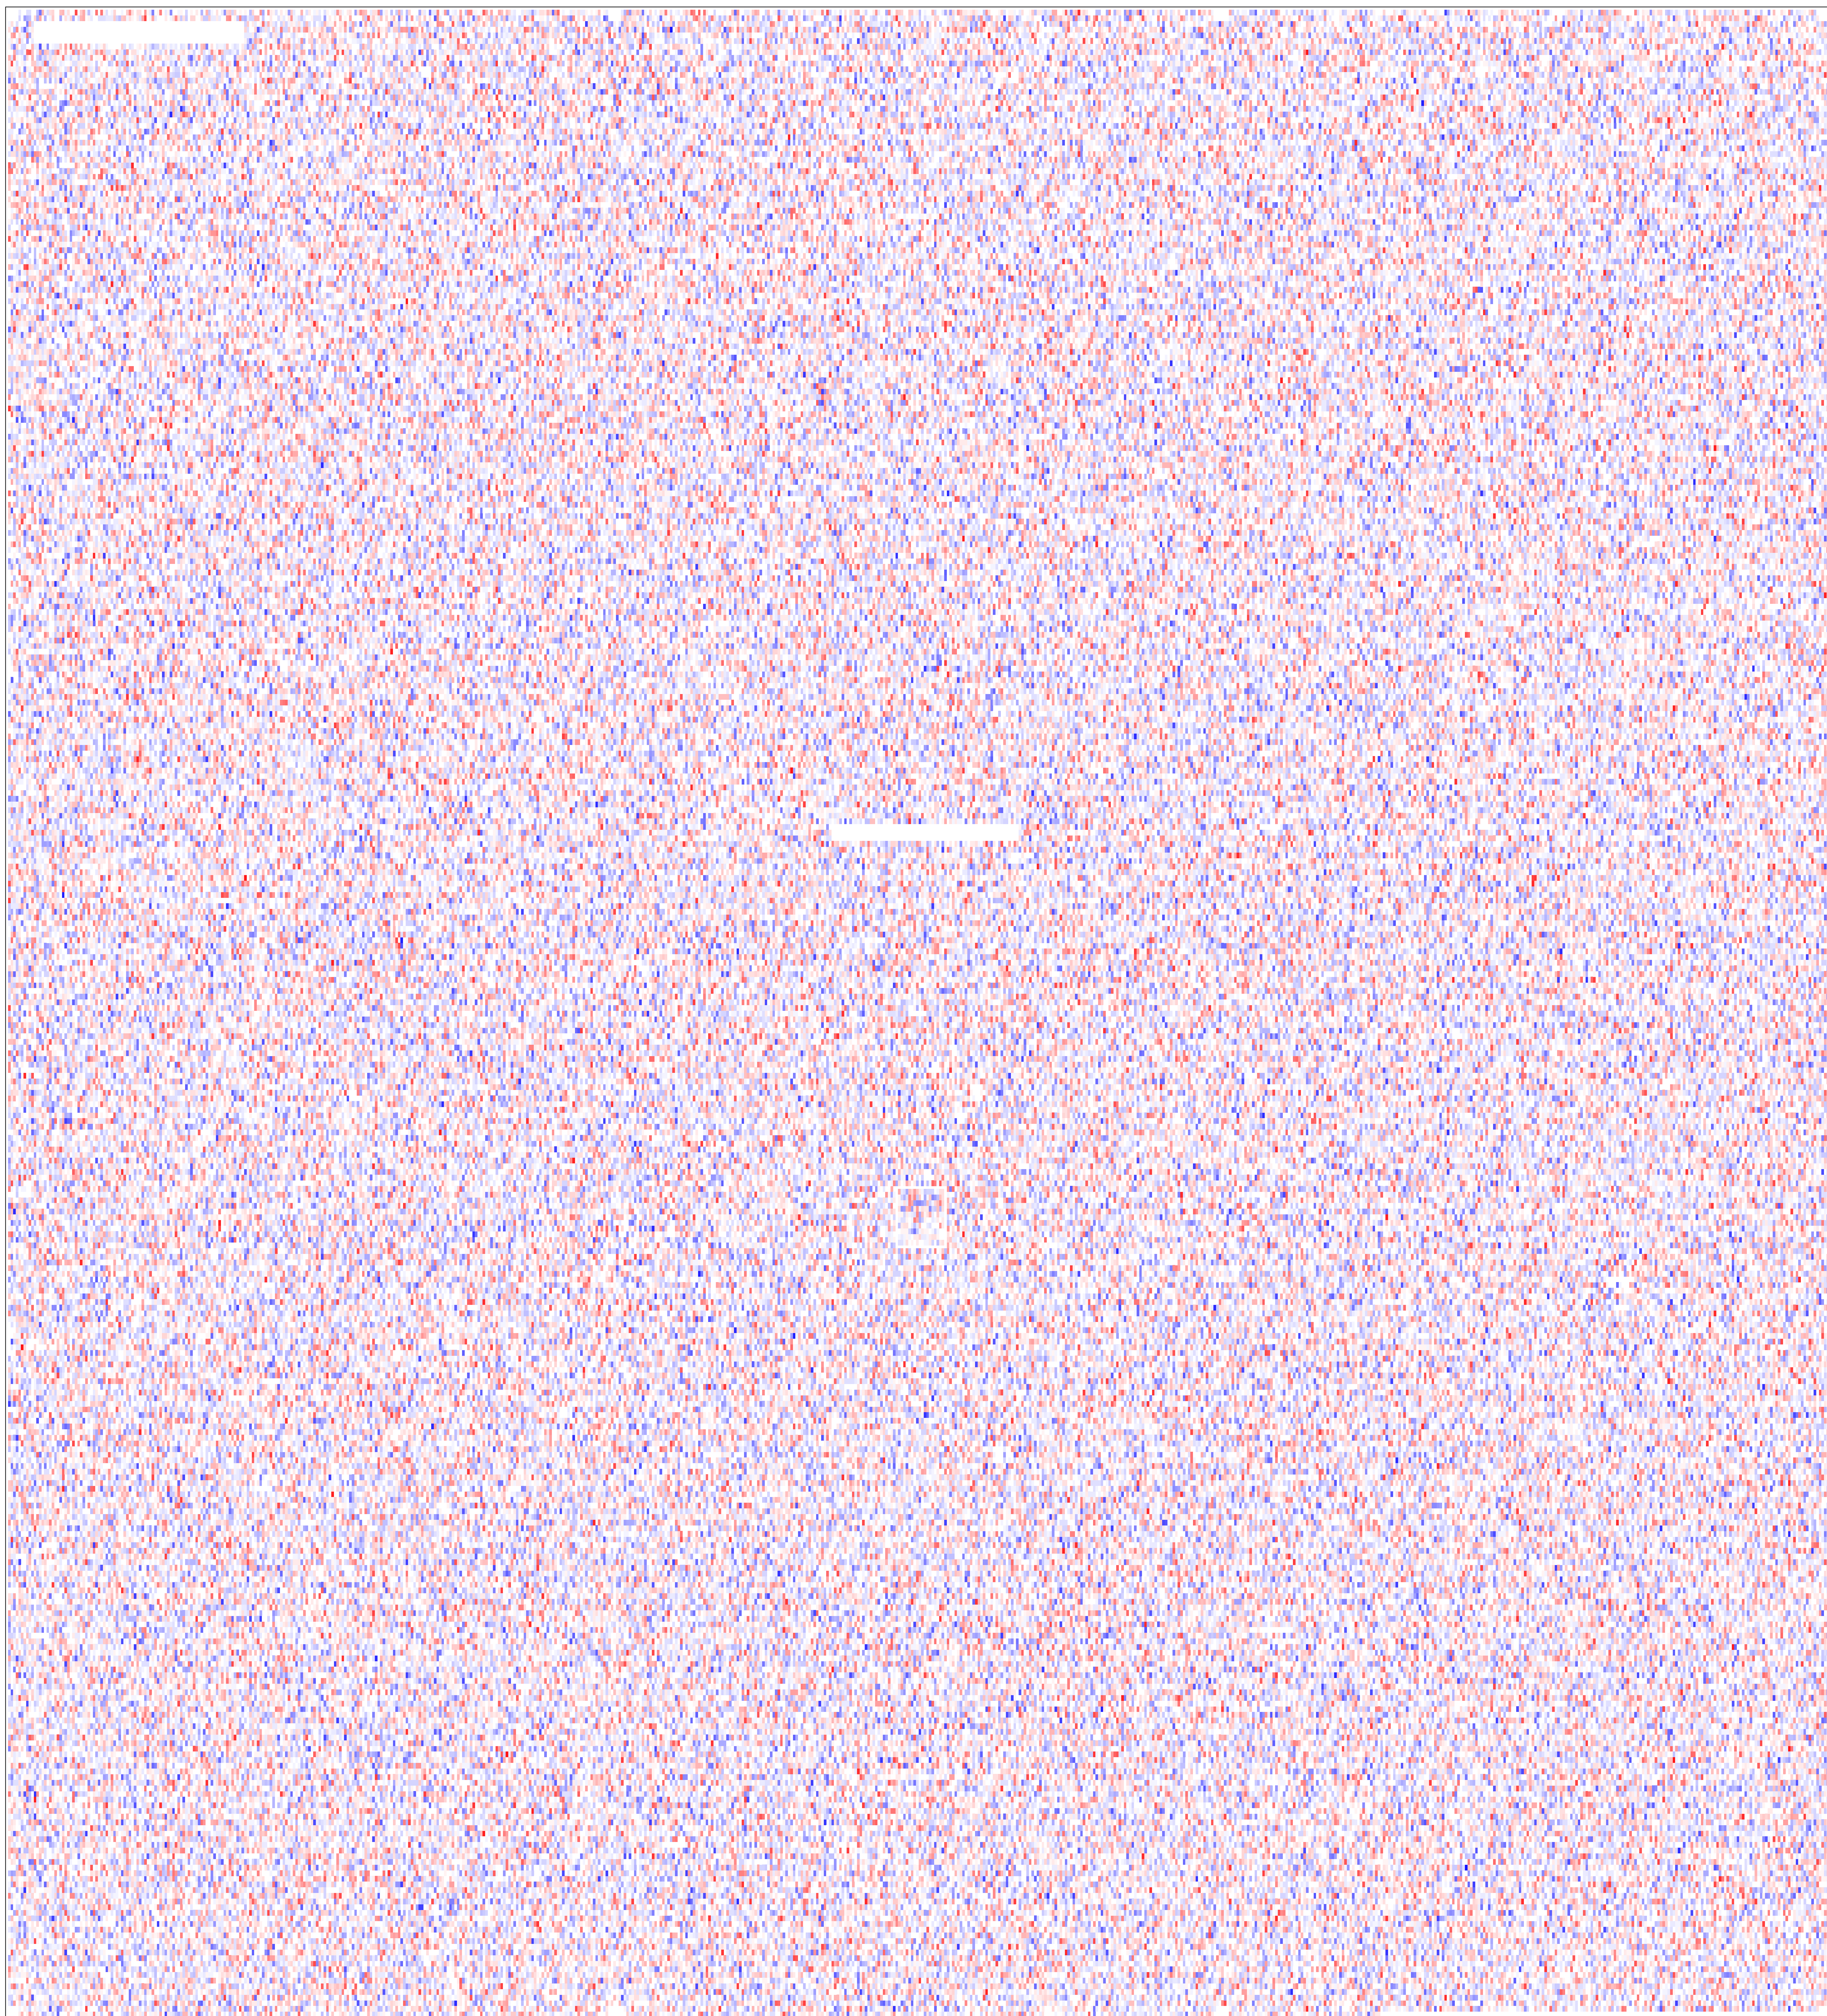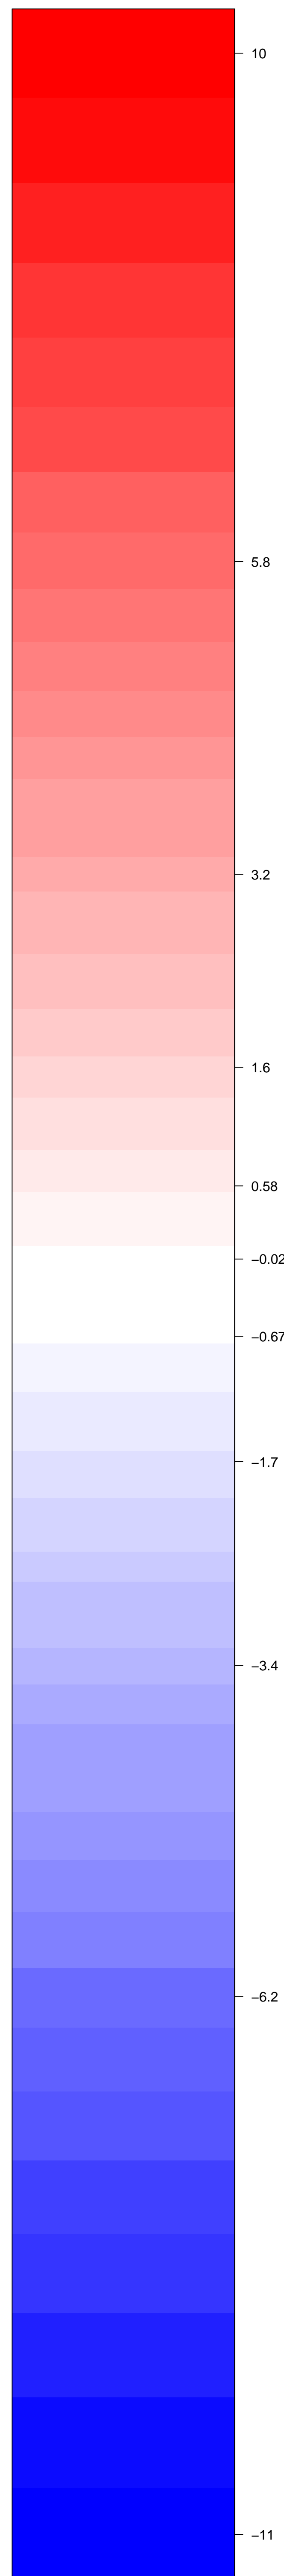



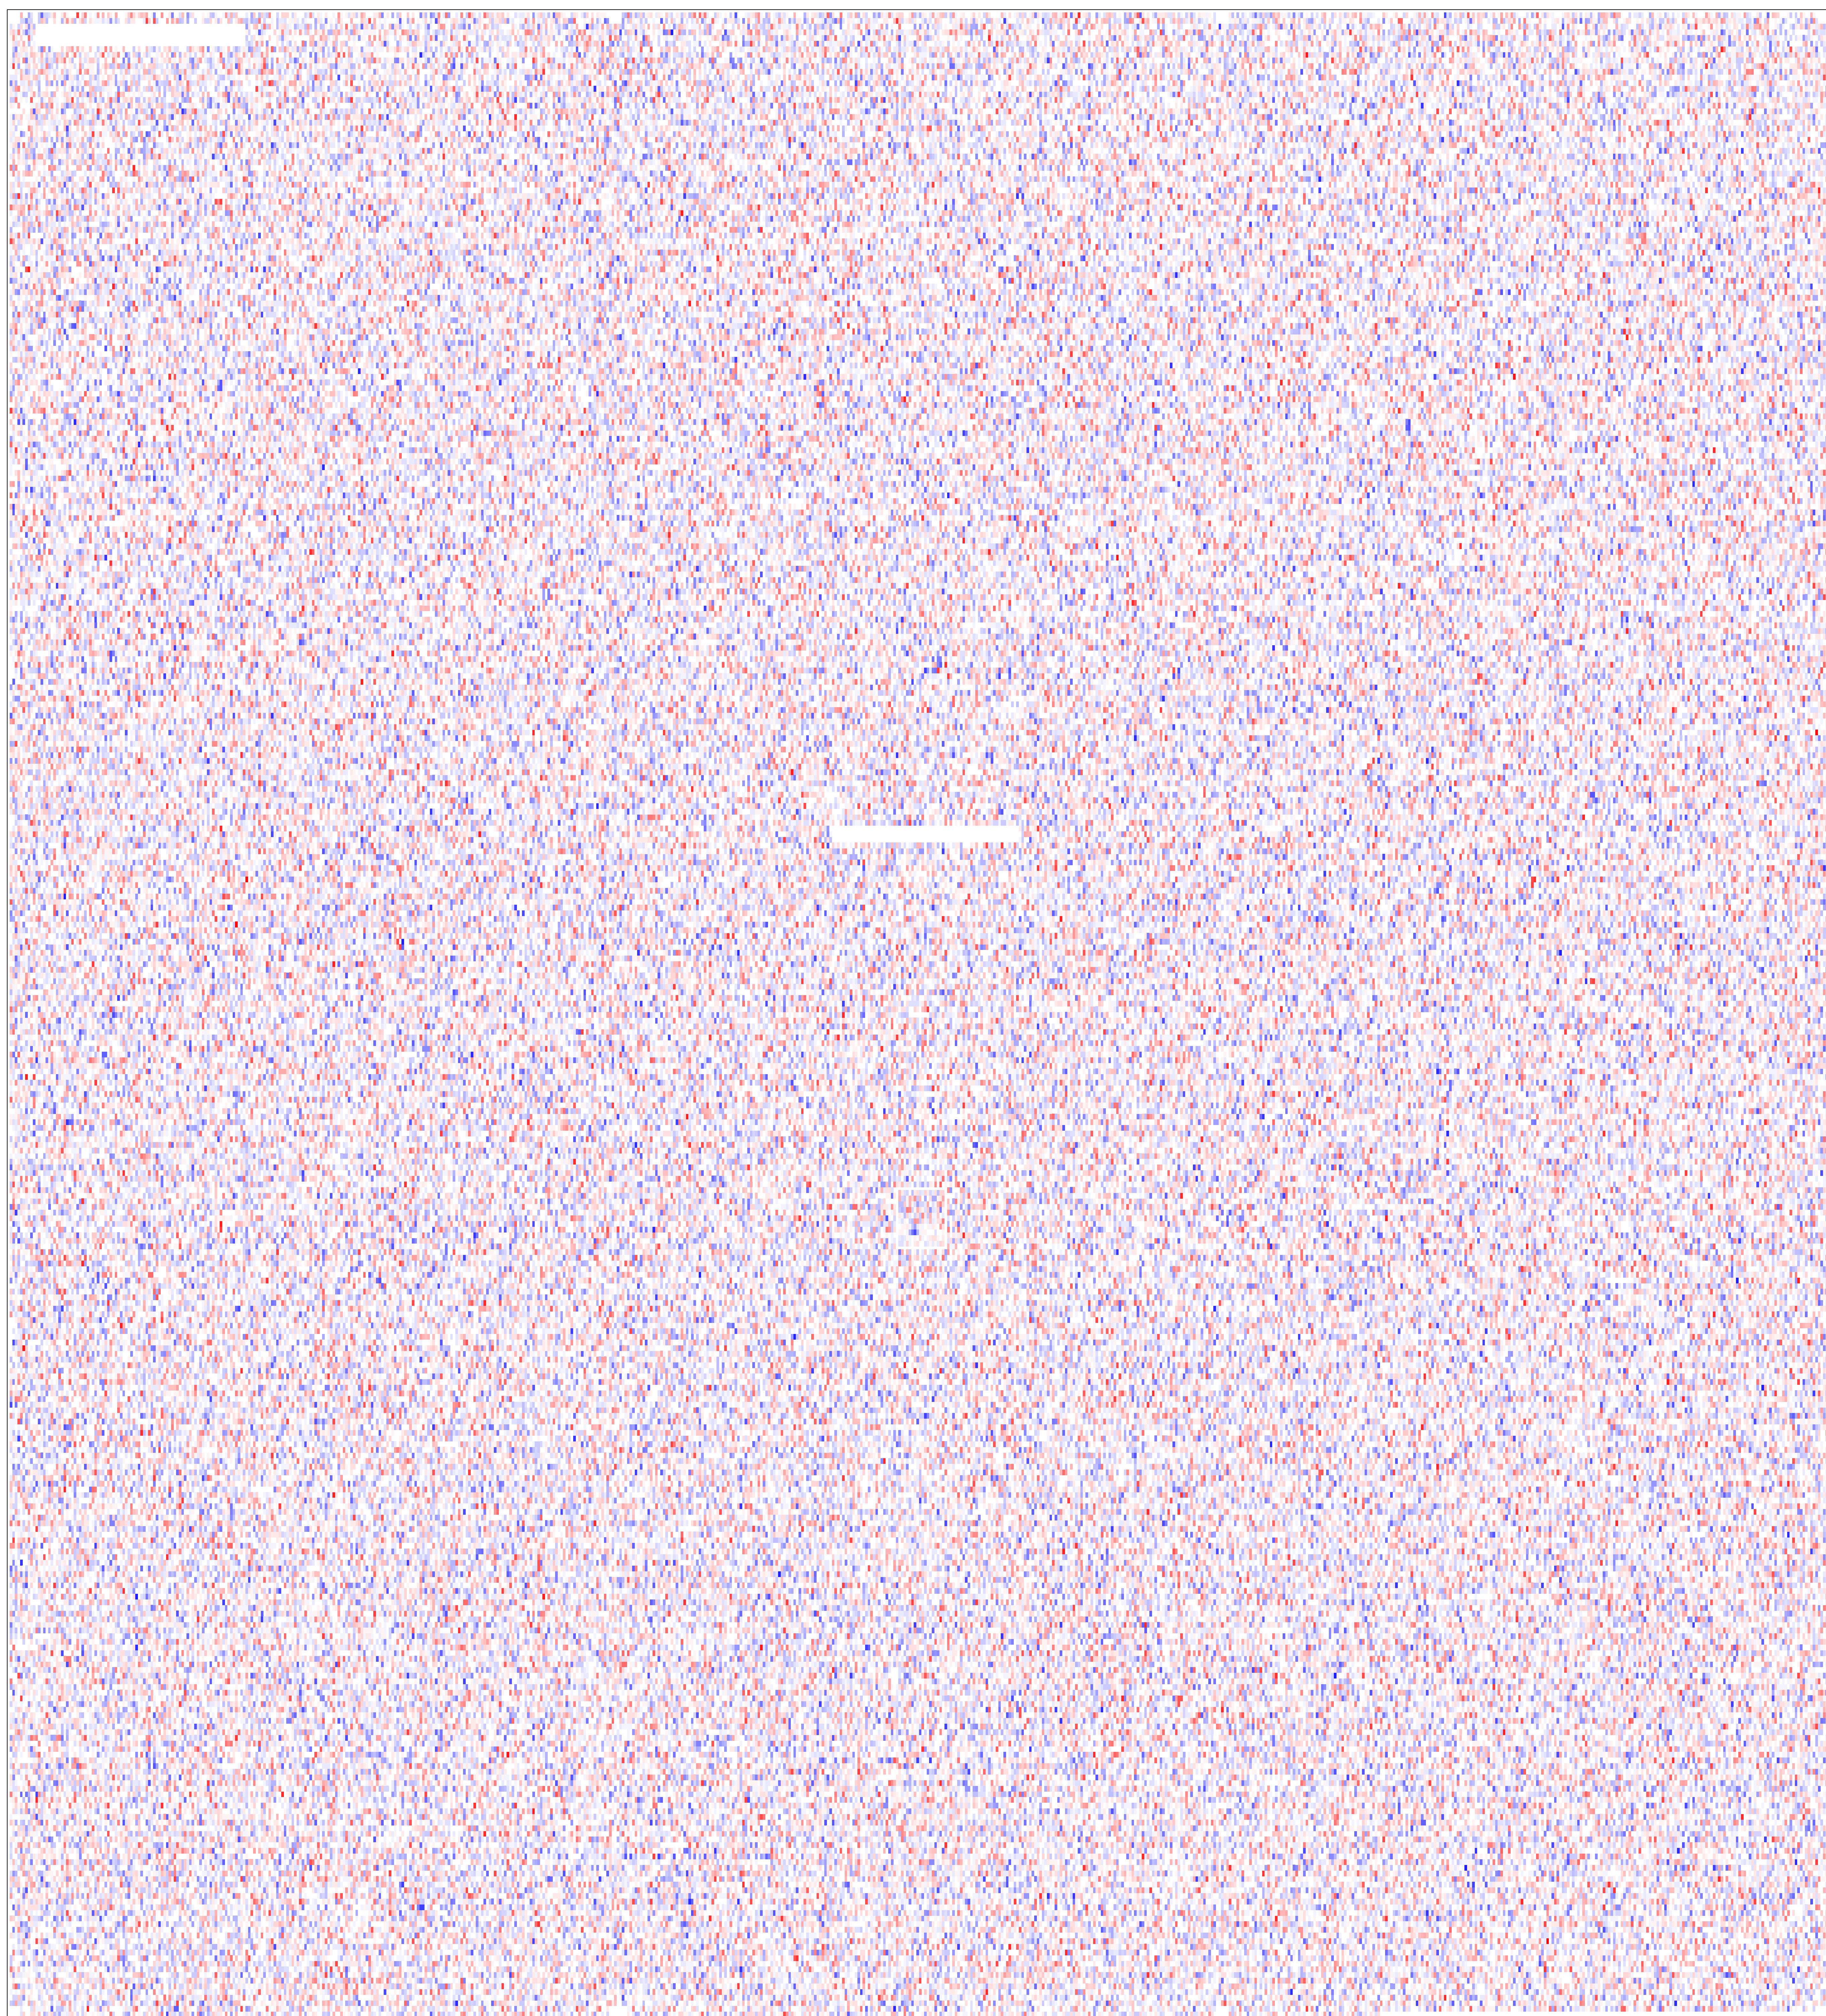

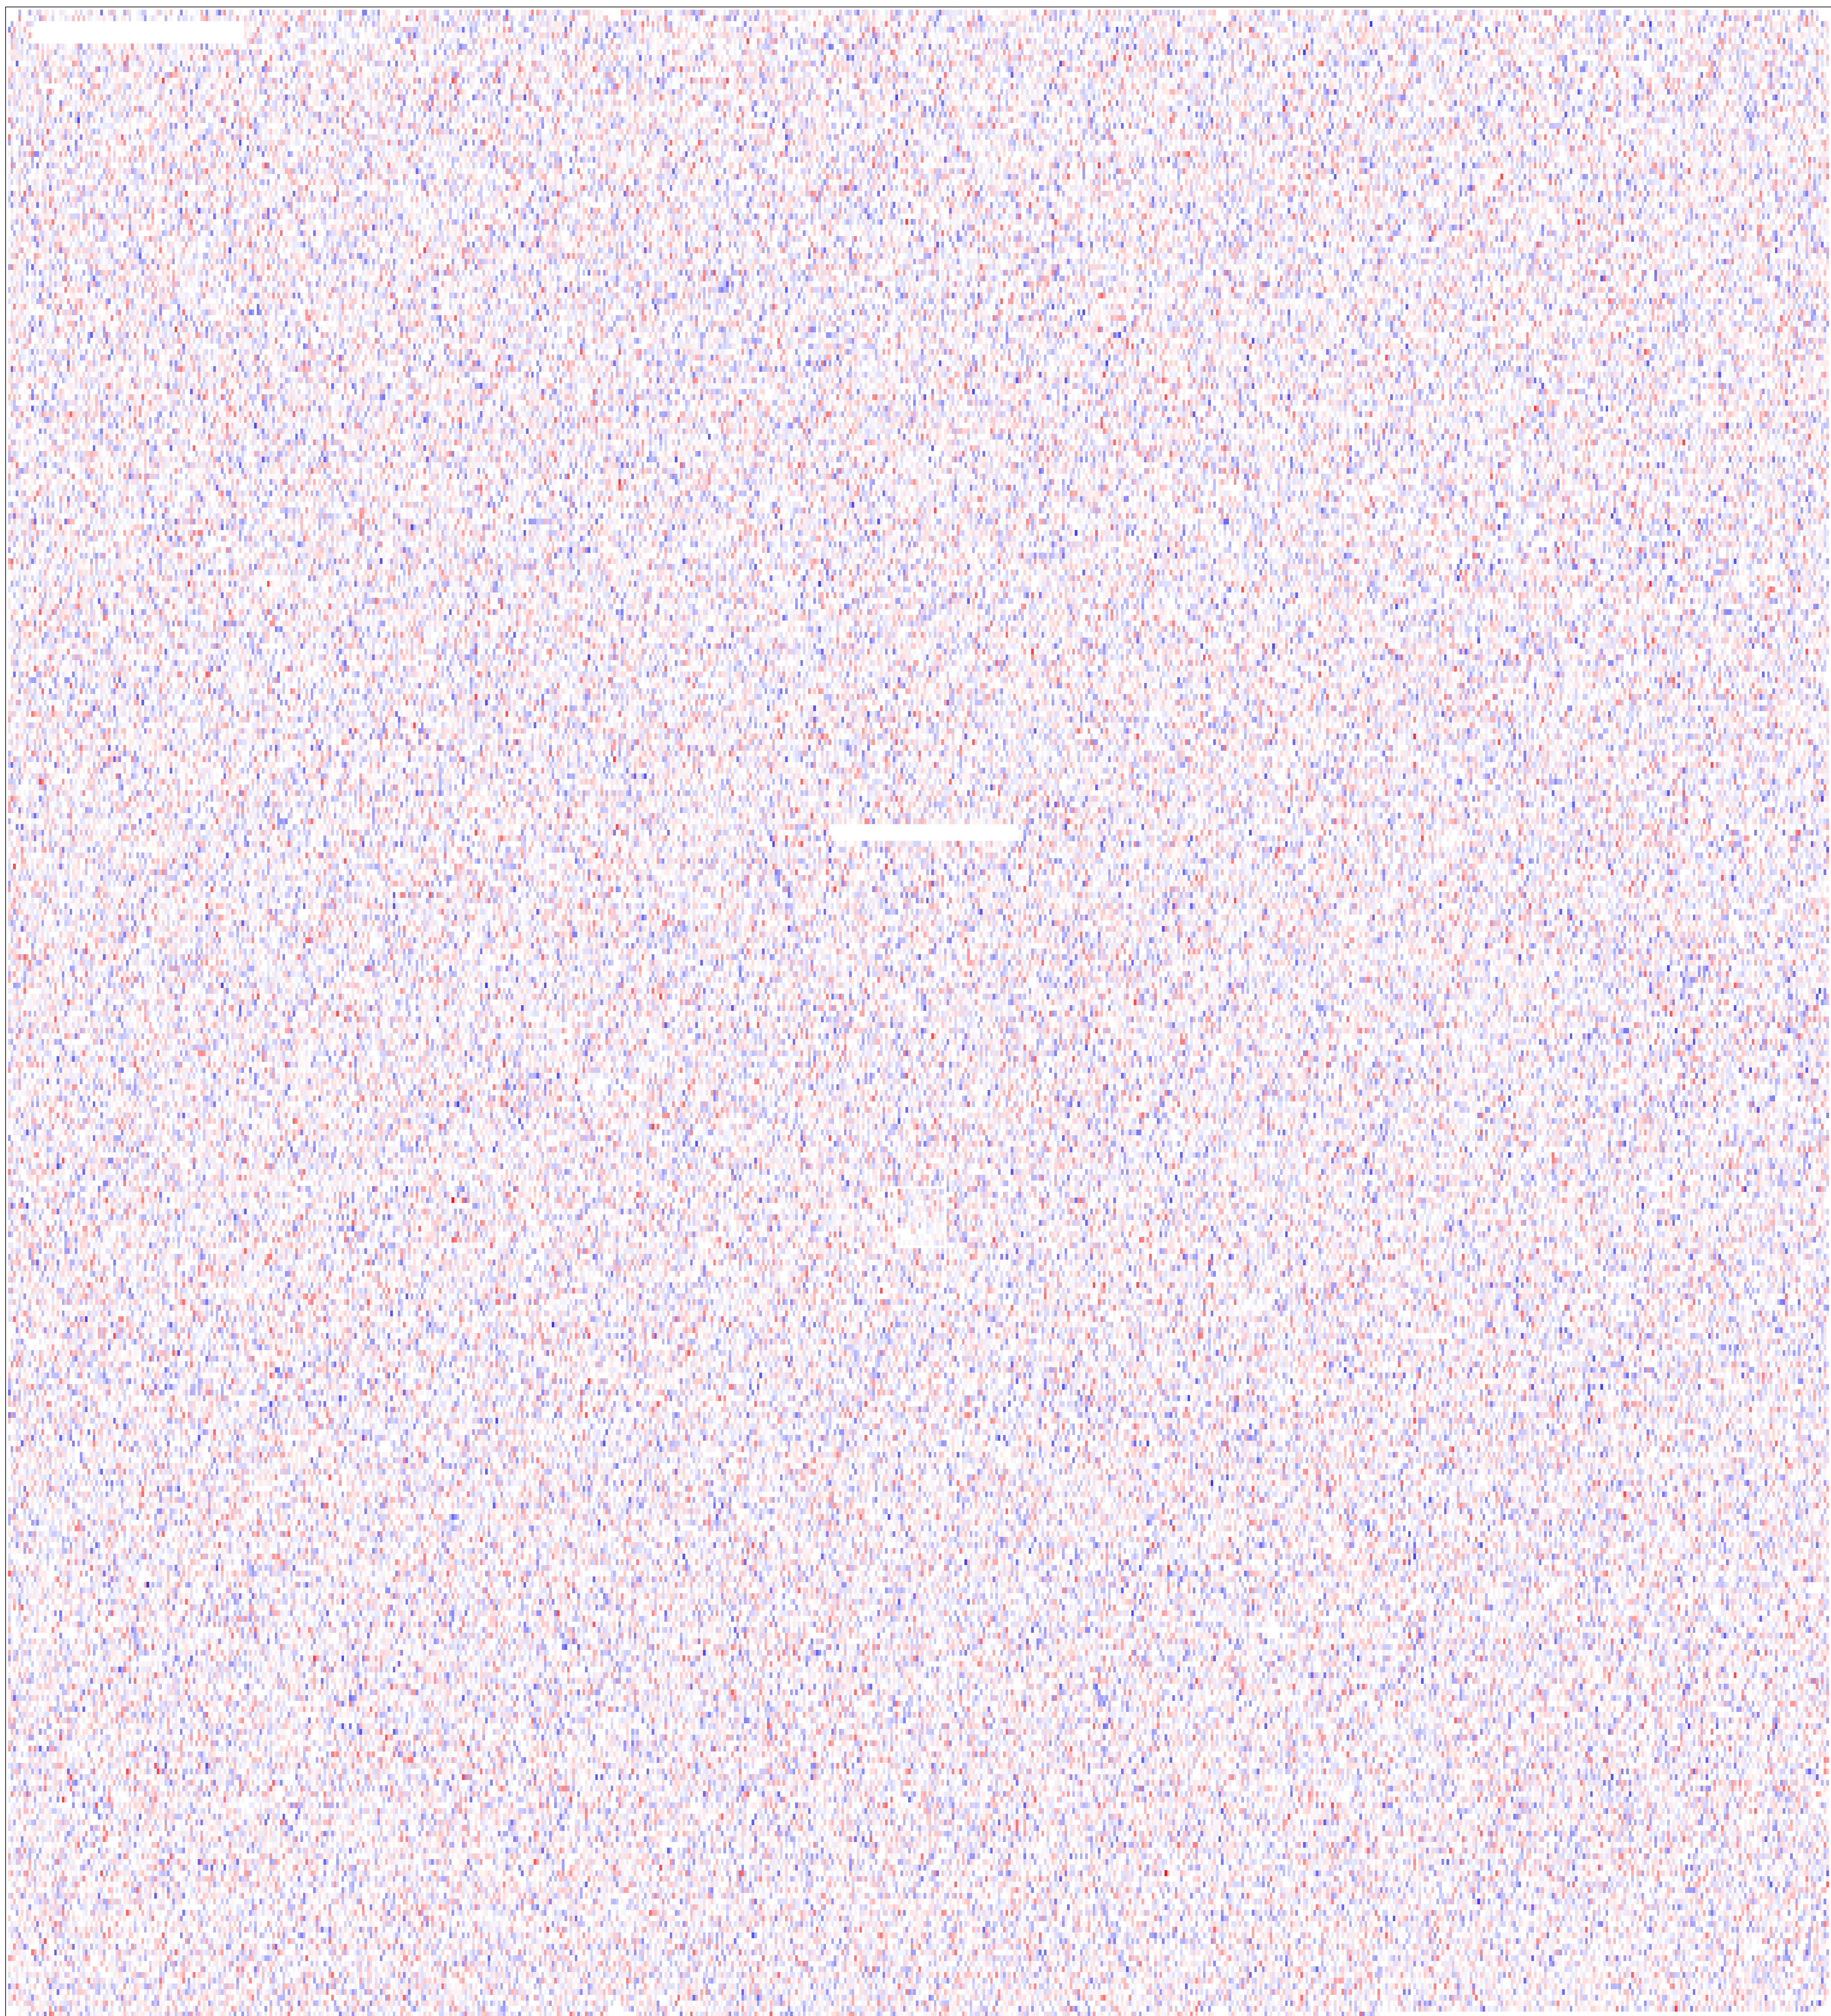

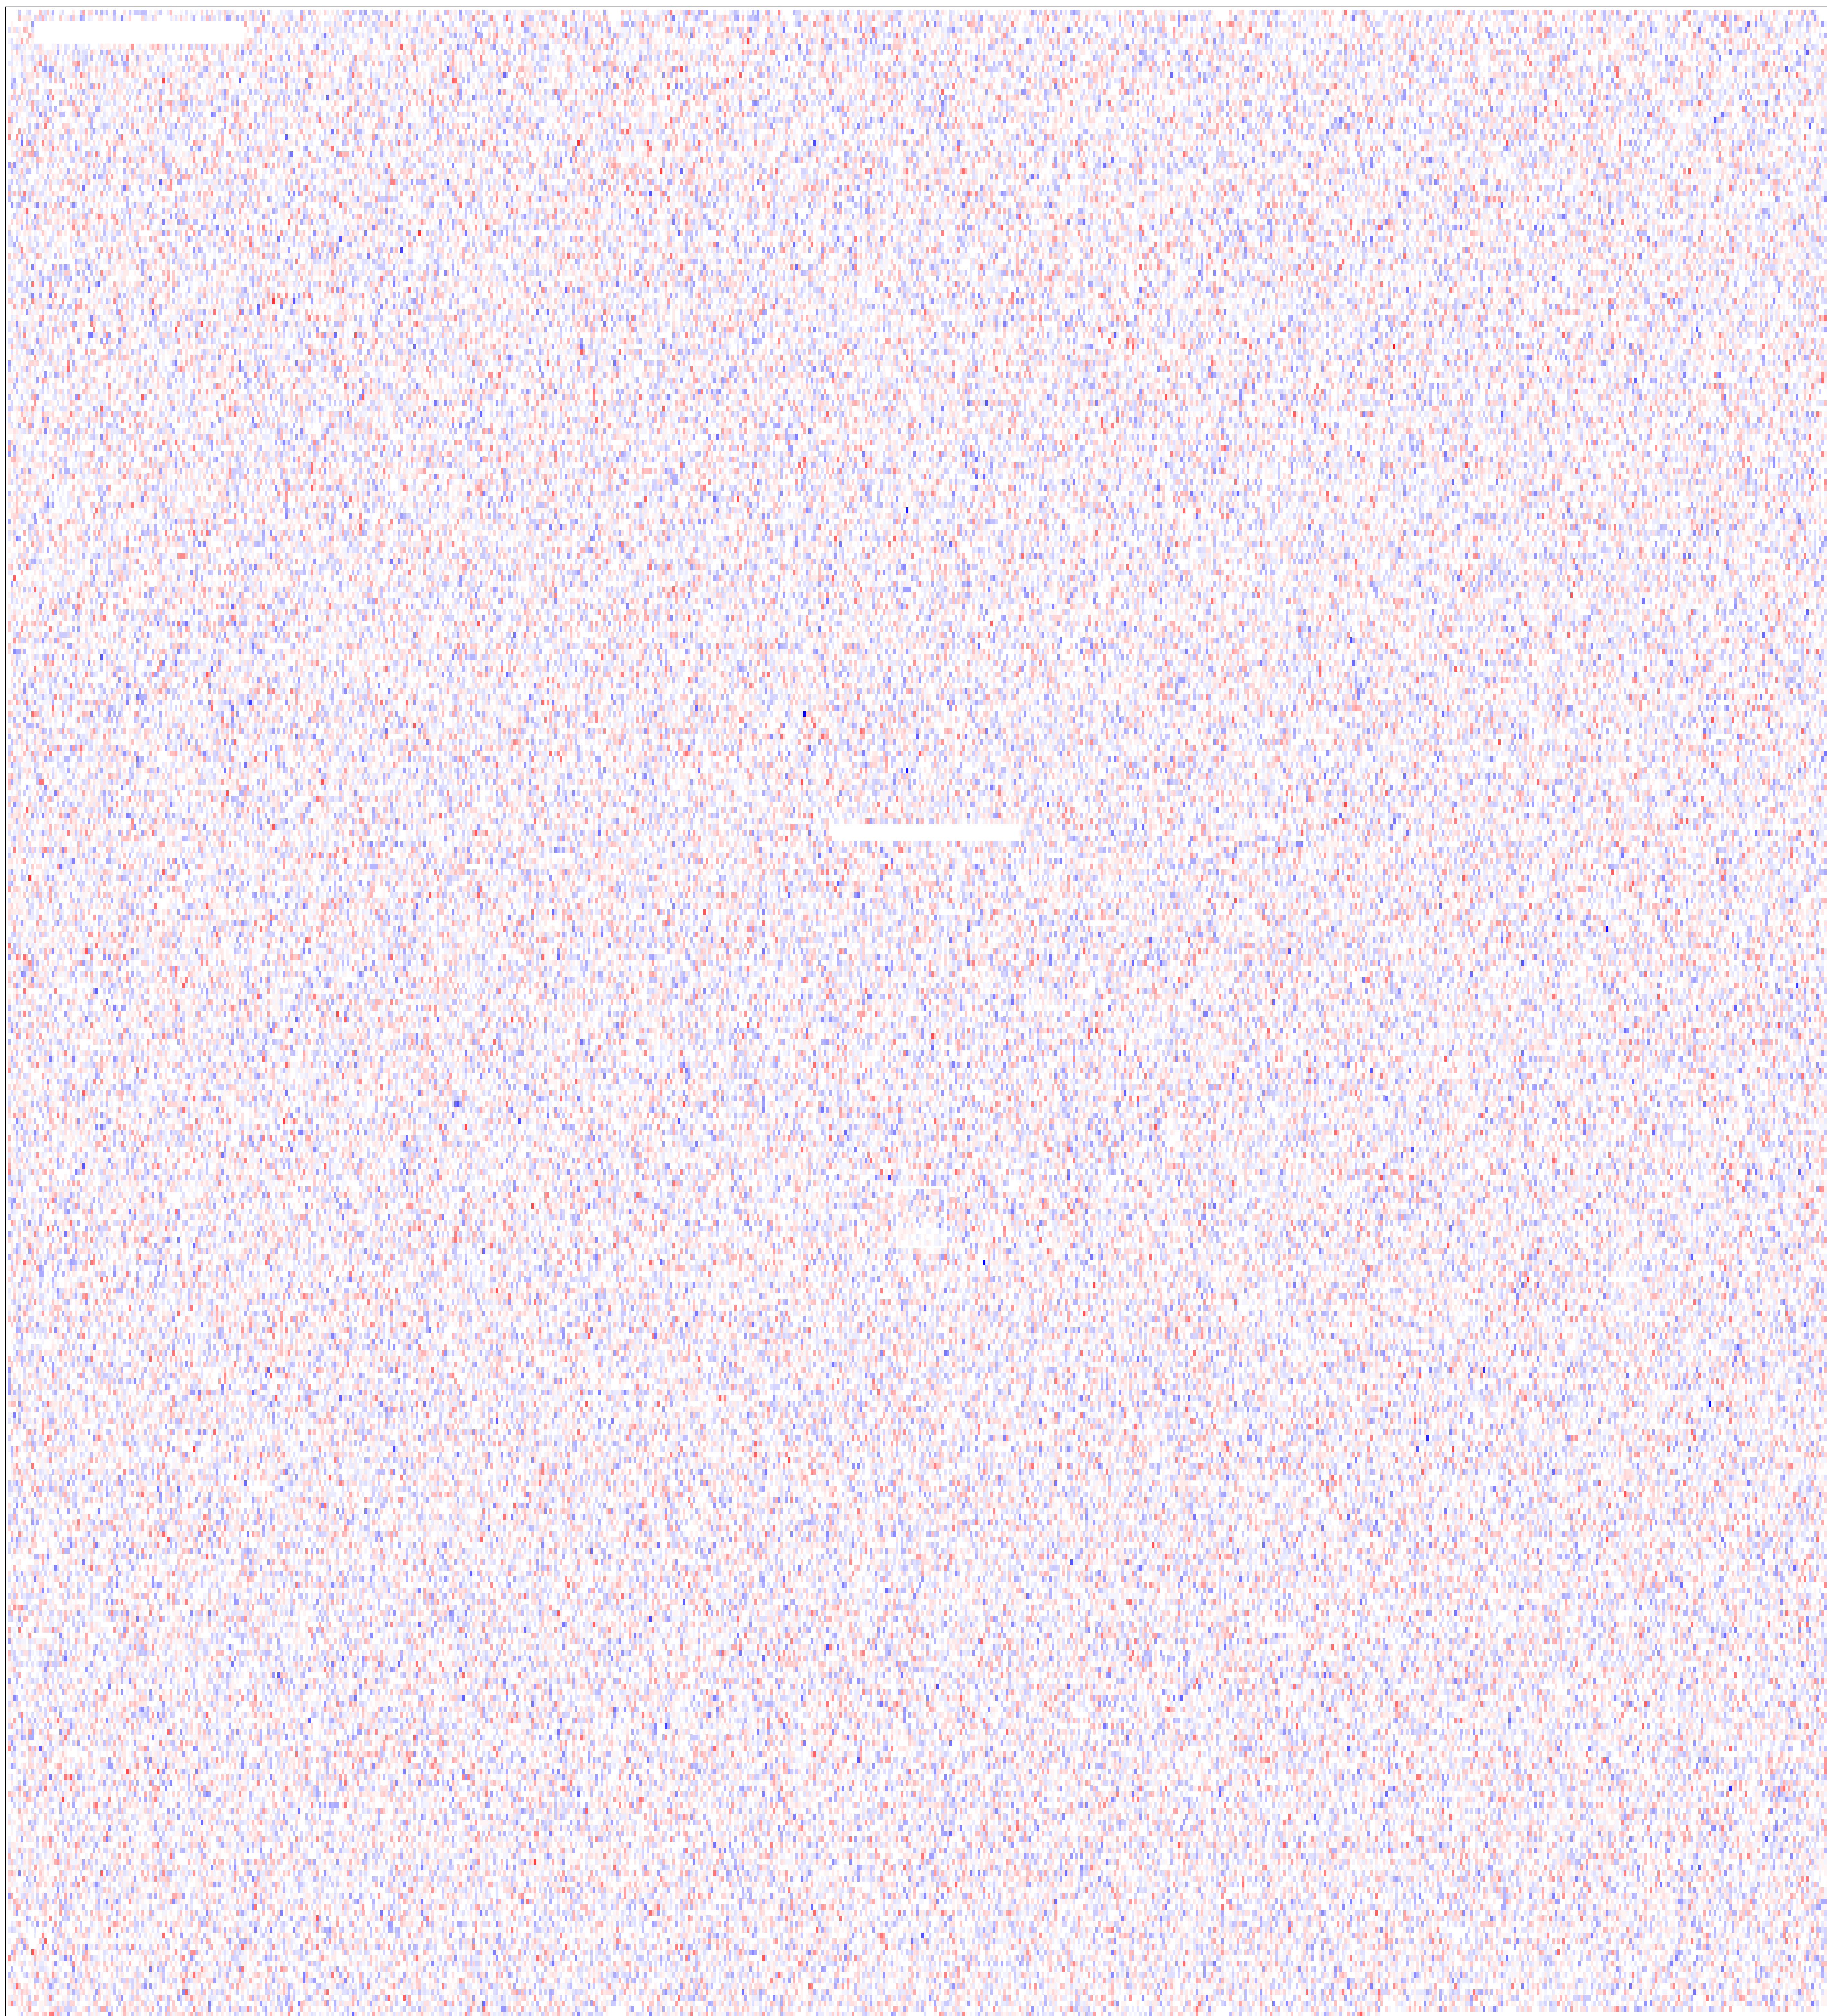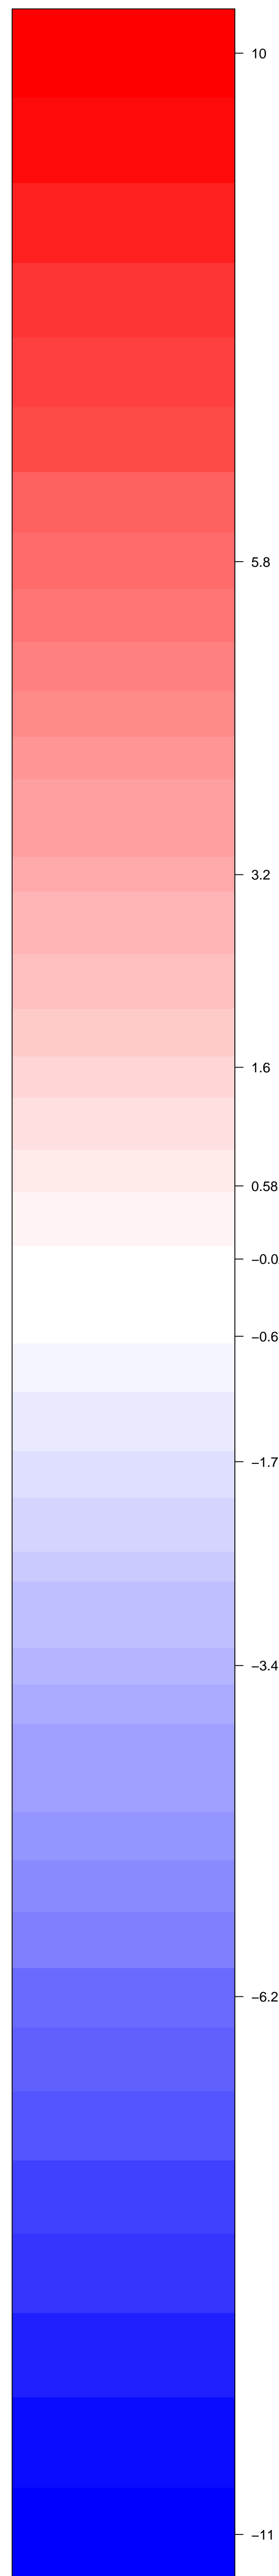

Supplement: gcrma.qq.PLM.resids.pdf [file gcrma.qq.PLM.resids.pdf]
