# Supplementary material for: The transcriptome of syncytia induced by the cyst nematode Heterodera schachtii in Arabidopsis roots
Source: PubMed Central journal article supplement (PMC2667683; doi:10.1111/j.1365-313x.2008.03727.x), 2008-12-09

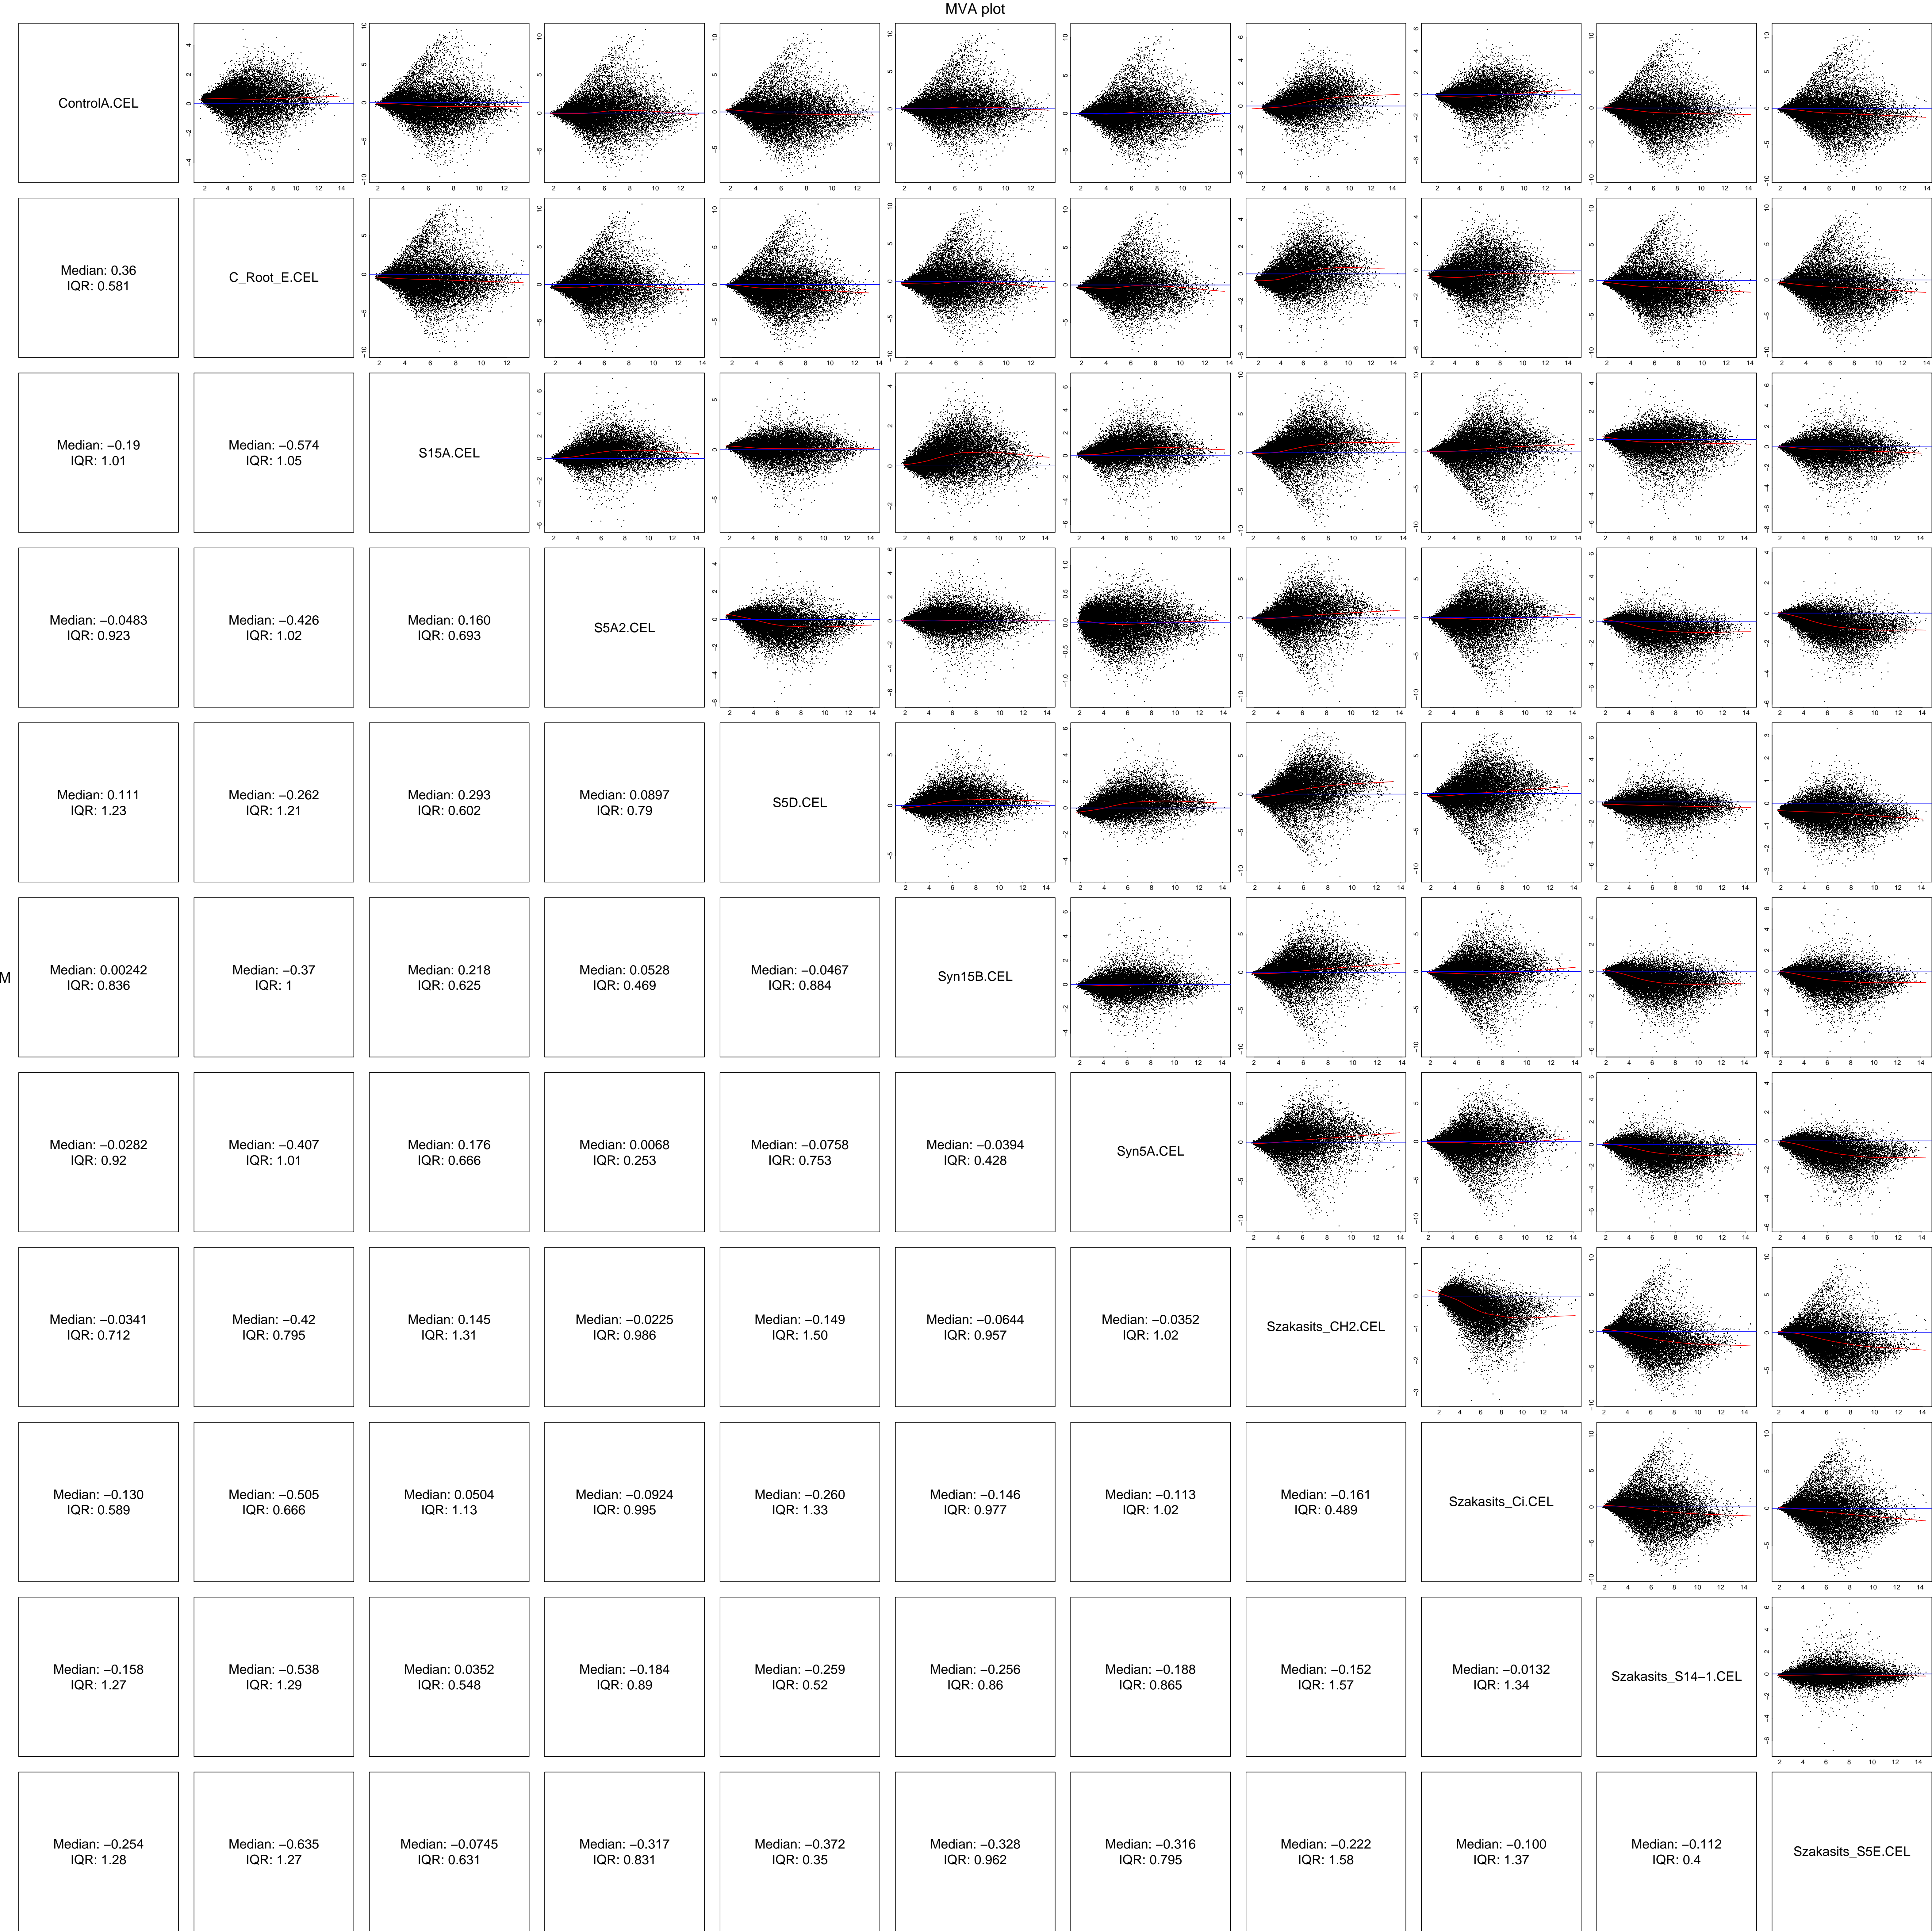

Supplement: gcrma.raw.PLM.MAs.pdf [file gcrma.raw.PLM.MAs.pdf]
