# Supplementary material for: The transcriptome of syncytia induced by the cyst nematode Heterodera schachtii in Arabidopsis roots
Source: PubMed Central journal article supplement (PMC2667683; doi:10.1111/j.1365-313x.2008.03727.x), 2008-12-09
Supplement: TableS5.pdf [file TableS5.pdf]

**List of affected genes, confidential preview.**

*Statistics are testing for differential expression (two-sided non-null).*

Ranks refer to this test.

Results are grouped by

Differentially expressed with  $q < 5\%$   $M > 0$

Differentially expressed with  $q < 5\%$   $M < 0$

Non-differentially expressed,  $q$  of 5% or higher

Up-regulation

Down-regulation

Insignificant

Additional summary views:

5 dpi and 15 dpi Syncytium Strongest expressed

Colour coding is according to the original test of  
(5 dpi and 15 dpi Syncytium) vs Root  
on the entire set of all genes.

... **Table S2**

Contact: D. Kreil  
<http://bioinf.boku.ac.at/>

| Rank  | Description                                                                                                                                                                                                                                                                                                                                                                                                                                                                                                                                                                                                                                                                                                                                         | Sync | Root | M    | t    |
|-------|-----------------------------------------------------------------------------------------------------------------------------------------------------------------------------------------------------------------------------------------------------------------------------------------------------------------------------------------------------------------------------------------------------------------------------------------------------------------------------------------------------------------------------------------------------------------------------------------------------------------------------------------------------------------------------------------------------------------------------------------------------|------|------|------|------|
| 892   | AT5G02380.1   Symbol: MT2B   metallothionein protein 2B (MT-2B), identical to SWISS-PROT:Q38805 metallothionein-like protein 2B (MT-2B) (Arabidopsis thaliana)   chr5:506545-507242 REVERSE   Aliases: METALLOTHIONEIN 2B, T1E22.140, T1E22_140                                                                                                                                                                                                                                                                                                                                                                                                                                                                                                     | 14.0 | 12.2 | 1.8  | 9.9  |
| 1114  | AT4G29350.1   Symbol: PRF2   profilin 2 (PRO2) (PFN2) (PRF2), identical to profilin 2 SP:Q42418 GI:1353772 from (Arabidopsis thaliana); identical to cDNA profilin (PRF2) GI:9965570   chr4:14450035-14451383 FORWARD   Aliases: F17A13.170, F17A13_170, PFN2, PROFILIN 2                                                                                                                                                                                                                                                                                                                                                                                                                                                                           | 13.9 | 12.3 | 1.6  | 9.2  |
| 1390  | AT3G60245.1   60S ribosomal protein L37a (RPL37aC)   chr3:22279721-22280981 FORWARD   Aliases: None                                                                                                                                                                                                                                                                                                                                                                                                                                                                                                                                                                                                                                                 | 13.7 | 12.6 | 1.2  | 8.5  |
| 7528  | AT4G27960.2   Symbol: UBC9   ubiquitin-conjugating enzyme E2-17 kDa 9 (UBC9), E2; identical to gi:297883, SP:P35132; identical to cDNA UBC9 for ubiquitin conjugating enzyme homolog GI:297883   chr4:13915839-13917426 REVERSE   Aliases: T13J8.70, T13J8_70, UBIQUITIN CONJUGATING ENZYME 9, UBIQUITIN PROTEIN LIGASE                                                                                                                                                                                                                                                                                                                                                                                                                             | 13.5 | 12.3 | 1.2  | 3.3  |
| 7529  | AT5G53300.2   Symbol: UBC10   ubiquitin-conjugating enzyme 10 (UBC10), E2; identical to gi:297877, SP:P35133   chr5:21649740-21651389 REVERSE   Aliases: None                                                                                                                                                                                                                                                                                                                                                                                                                                                                                                                                                                                       | 13.5 | 12.3 | 1.2  | 3.3  |
| 3923  | AT4G05050.2   Symbol: UBQ11   similar to polyubiquitin (UBQ14) [Arabidopsis thaliana] (TAIR:At4g02890.1); similar to polyubiquitin (UBQ3) [Arabidopsis thaliana] (TAIR:At5g03240.2); similar to polyubiquitin (UBQ4) [Arabidopsis thaliana] (TAIR:At5g20620.1); similar to polyubiquitin (UBQ14) [Arabidopsis thaliana] (TAIR:At4g02890.2); similar to polyubiquitin (UBQ14) [Arabidopsis thaliana] (TAIR:At4g02890.3); similar to ubiquitin-like protein [Phaseolus vulgaris] (GB:AAB36545.1); similar to polyubiquitin [Fragaria x ananassa] (GB:AAB68045.1); similar to pentameric polyubiquitin (GB:AAA34124.1); contains InterPro domain Ubiquitin domain (InterPro:IPR000626)   chr4:2588002-2589137 REVERSE   Aliases: C17L7.6, UBIQUITIN 11 | 13.5 | 12.4 | 1.1  | 5.3  |
| 12680 | AT1G54410.1   dehydrin family protein, contains Pfam domain, PF00257: Dehydrin                                                                                                                                                                                                                                                                                                                                                                                                                                                                                                                                                                                                                                                                      | 13.4 | 13.7 | -0.3 | -1.7 |
| 306   | AT1G66410.1   Symbol: CAM4   calmodulin-1/4 (CAM4), identical to calmodulin (Arabidopsis thaliana) GI:16223; nearly identical to SP:P25854 Calmodulin-1/4 {Arabidopsis thaliana}   chr1:24777880-24779516 REVERSE   Aliases: ACAM 4, CALMODULIN 4, T27F4.1, T27F4_1                                                                                                                                                                                                                                                                                                                                                                                                                                                                                 | 13.4 | 10.9 | 2.5  | 14.2 |
| 3060  | ATCG00470.1   Symbol: ATPE   ATPase epsilon subunit   chrC:52265-52663 REVERSE   Aliases: ATPE                                                                                                                                                                                                                                                                                                                                                                                                                                                                                                                                                                                                                                                      | 13.4 | 12.4 | 1.0  | 6.1  |
| 2755  | AT5G39570.1   expressed protein   chr5:15861187-15863406 FORWARD   Aliases: MIJ24.6, MIJ24_6                                                                                                                                                                                                                                                                                                                                                                                                                                                                                                                                                                                                                                                        | 13.4 | 12.6 | 0.8  | 6.4  |
| 667   | AT3G11940.2   Symbol: ATRPS5A   40S ribosomal protein S5 (RPS5B), similar to 40S ribosomal protein S5 GB:AAC98068 GI:4056502 from (Arabidopsis thaliana)   chr3:3777901-3779509 REVERSE   Aliases: AML1, ARABIDOPSIS MINUTE LIKE 1, MEC18.11, RIBOSOMAL PROTEIN 5A                                                                                                                                                                                                                                                                                                                                                                                                                                                                                  | 13.3 | 11.9 | 1.4  | 10.9 |
| 666   | AT2G37270.2   Symbol: ATRPS5B   similar to 40S ribosomal protein S5 (RPS5B) [Arabidopsis thaliana] (TAIR:At3g11940.1); similar to 40S ribosomal protein S5 (RPS5B) [Arabidopsis thaliana] (TAIR:At3g11940.2); similar to putative 40S ribosomal protein S5 [Oryza sativa (japonica cultivar-group)] (GB:NP_908322.1); contains InterPro domain Ribosomal protein S7, eukaryotic and archaeal form (InterPro:IPR005716); contains InterPro domain Ribosomal protein S7 (InterPro:IPR000235)   chr2:15654756-15656282 REVERSE   Aliases: F3G5.6, F3G5_6, RIBOSOMAL PROTEIN 5B                                                                                                                                                                         | 13.3 | 11.9 | 1.4  | 10.9 |
| 2776  | AT3G10860.1   ubiquinol-cytochrome C reductase complex ubiquinone-binding protein, putative / ubiquinol-cytochrome C reductase complex 8.2 kDa protein, putative, similar to ubiquinol--cytochrome c reductase GI:633687 from (Solanum tuberosum)   chr3:3399741-3400732 FORWARD   Aliases: T7M13.6                                                                                                                                                                                                                                                                                                                                                                                                                                                 | 13.3 | 12.7 | 0.6  | 6.4  |
| 1691  | AT5G42980.1   Symbol: ATTRX3                                                                                                                                                                                                                                                                                                                                                                                                                                                                                                                                                                                                                                                                                                                        | 13.3 | 12.2 | 1.1  | 7.9  |
| 3490  | AT5G42300.1   ubiquitin family protein, contains INTERPRO:IPR000626 ubiquitin domain   chr5:16929561-16931158 REVERSE   Aliases: K5J14.10, K5J14_10                                                                                                                                                                                                                                                                                                                                                                                                                                                                                                                                                                                                 | 13.3 | 12.7 | 0.6  | 5.7  |
| 3109  | AT5G64350.1   Symbol: FKBP12                                                                                                                                                                                                                                                                                                                                                                                                                                                                                                                                                                                                                                                                                                                        | 13.2 | 12.2 | 1.0  | 6.0  |
| 4159  | AT3G52300.2   similar to putative mitochondrial F0 ATP synthase D chain [Oryza sativa (japonica cultivar-group)] (GB:XP_482965.1)   chr3:19407543-19409355 FORWARD   Aliases: T25B15.70                                                                                                                                                                                                                                                                                                                                                                                                                                                                                                                                                             | 13.2 | 11.6 | 1.6  | 5.1  |
| 1117  | AT2G02100.1   Symbol: LCR69/PDF2.2   plant defensin-fusion protein, putative (PDF2.2), plant defensin protein family member, personal communication, Bart Thomma (Bart.Thomma@agr.kuleuven.ac.be); similar to SWISS-PROT:O65740   chr2:528349-529107 FORWARD   Aliases: F5O4.13, F5O4_13, LCR69, Low molecular weight cysteine rich 69, PDF2.2                                                                                                                                                                                                                                                                                                                                                                                                      | 13.2 | 11.1 | 2.0  | 9.2  |
| 4802  | AT4G05320.5   Symbol: UBQ10   polyubiquitin (UBQ10) (SEN3), senescence-associated protein; identical to GI:870791   chr4:2718168-2720130 FORWARD   Aliases: C17L7.240, C17L7_240, POLYUBIQUITIN 10                                                                                                                                                                                                                                                                                                                                                                                                                                                                                                                                                  | 13.1 | 13.6 | -0.5 | -4.7 |
| 2608  | AT1G14320.1   60S ribosomal protein L10 (RPL10A) / Wilm's tumor suppressor protein-related, similar to tumor suppressor GI:575354 from (Oryza sativa)   chr1:4888209-4889656 FORWARD   Aliases: F14L17.9, F14L17_9                                                                                                                                                                                                                                                                                                                                                                                                                                                                                                                                  | 13.1 | 12.0 | 1.1  | 6.6  |

|                                                                                                                                                                                                                                                                                                                                                                                                                                                                                                                                                                                          |      |      |      |      |
|------------------------------------------------------------------------------------------------------------------------------------------------------------------------------------------------------------------------------------------------------------------------------------------------------------------------------------------------------------------------------------------------------------------------------------------------------------------------------------------------------------------------------------------------------------------------------------------|------|------|------|------|
| 330 AT5G40370.1   glutaredoxin, putative, similar to glutaredoxin (Ricinus communis) SWISS-PROT:P55143   chr5:16164833-16166382 REVERSE   Aliases: MPO12.80, MPO12_80                                                                                                                                                                                                                                                                                                                                                                                                                    | 13.1 | 10.5 | 2.5  | 13.8 |
| 15619 AT1G76200.1   expressed protein   chr1:28598144-28599636 FORWARD   Aliases: T23E18.30, T23E18_30                                                                                                                                                                                                                                                                                                                                                                                                                                                                                   | 13.1 | 13.2 | -0.1 | -1.0 |
| 2309 AT1G52300.1   60S ribosomal protein L37 (RPL37B), similar to SP:Q43292 from (Arabidopsis thaliana)   chr1:19478716-19479887 REVERSE   Aliases: F19K6.12, F19K6_12                                                                                                                                                                                                                                                                                                                                                                                                                   | 13.0 | 11.8 | 1.2  | 7.0  |
| 2719 AT3G43980.1   40S ribosomal protein S29 (RPS29A), ribosomal protein S29, rat, PIR:S30298   chr3:15789389-15790298 REVERSE   Aliases: T15B3.120, T15B3_120                                                                                                                                                                                                                                                                                                                                                                                                                           | 13.0 | 11.8 | 1.2  | 6.4  |
| 2720 AT3G44010.1   40S ribosomal protein S29 (RPS29B), ribosomal protein S29, rat, PIR:S30298   chr3:15810918-15812187 REVERSE   Aliases: T15B3.150                                                                                                                                                                                                                                                                                                                                                                                                                                      | 13.0 | 11.8 | 1.2  | 6.4  |
| 84 AT1G28400.1   expressed protein, similar to E6 (GI:1000090) (Gossypium barbadense)   chr1:9972370-9973779 REVERSE   Aliases: F3M18.16, F3M18_16                                                                                                                                                                                                                                                                                                                                                                                                                                       | 12.9 | 10.0 | 3.0  | 21.5 |
| 983 AT1G77120.1   Symbol: ADH1   alcohol dehydrogenase (ADH), identical to alcohol dehydrogenase GI:469467 from (Arabidopsis thaliana)   chr1:28980345-28982311 FORWARD   Aliases: ADH, ALCOHOL DEHYDROGENASE, ALCOHOL DEHYDROGENASE 1, F22K20.19, F22K20_19                                                                                                                                                                                                                                                                                                                             | 12.9 | 9.5  | 3.4  | 9.6  |
| 835 AT5G59880.2   Symbol: ADF3   actin-depolymerizing factor 3 (ADF3), identical to SP:Q9ZSK4 Actin-depolymerizing factor 3 (ADF 3) (AtADF3) {Arabidopsis thaliana}   chr5:24137457-24139105 FORWARD   Aliases: ACTIN DEPOLYMERIZING FACTOR 3, MMN10.4, MMN10_4                                                                                                                                                                                                                                                                                                                          | 12.9 | 10.4 | 2.5  | 10.1 |
| 1238 AT3G49010.3   Symbol: ATBBC1                                                                                                                                                                                                                                                                                                                                                                                                                                                                                                                                                        | 12.9 | 10.8 | 2.1  | 8.9  |
| 1859 AT4G20150.1   expressed protein   chr4:10888309-10889606 REVERSE   Aliases: F1C12.70, F1C12_70                                                                                                                                                                                                                                                                                                                                                                                                                                                                                      | 12.9 | 11.6 | 1.2  | 7.6  |
| 1342 AT4G27090.1   60S ribosomal protein L14 (RPL14B), ribosomal protein L14 - Human,PIR3:JC5954   chr4:13593911-13595257 REVERSE   Aliases: T24A18.40, T24A18_40                                                                                                                                                                                                                                                                                                                                                                                                                        | 12.8 | 11.4 | 1.4  | 8.6  |
| 12758 AT3G55440.1   Symbol: ATCTIMC   triosephosphate isomerase, cytosolic, putative, strong similarity to triosephosphate isomerase, cytosolic from Petunia hybrida (SP:P48495), from Coptis japonica (SP:P21820)   chr3:20564671-20567537 FORWARD   Aliases: CYTOSOLIC TRIOSE PHOSPHATE ISOMERASE, T22E16.100                                                                                                                                                                                                                                                                          | 12.8 | 12.2 | 0.7  | 1.6  |
| 7983 NA                                                                                                                                                                                                                                                                                                                                                                                                                                                                                                                                                                                  | 12.8 | 13.2 | -0.4 | -3.1 |
| 2617 AT1G31812.1   acyl-CoA binding protein / ACBP, identical to acyl-CoA-binding protein (ACBP) (Arabidopsis thaliana) SWISS-PROT:P57752   chr1:11410857-11412170 REVERSE   Aliases: F5M6.27, F5M6_27                                                                                                                                                                                                                                                                                                                                                                                   | 12.8 | 11.6 | 1.1  | 6.6  |
| 2479 AT3G12490.2   similar to cysteine protease inhibitor, putative / cystatin, putative [Arabidopsis thaliana] (TAIR:At5g05110.1); similar to cysteine protease inhibitor CPI-1 [Brassica oleracea] (GB:AAL59842.1); contains InterPro domain Cystatin C/M (InterPro:IPR003243); contains InterPro domain Cysteine protease inhibitor (InterPro:IPR000010)                                                                                                                                                                                                                              | 12.7 | 10.6 | 2.1  | 6.7  |
| 1018 AT4G10340.1   Symbol: LHCB5   chlorophyll A-B binding protein CP26, chloroplast / light-harvesting complex II protein 5 / LHCIIC (LHCB5), identical to SP:Q9XF89 Chlorophyll A/B-binding protein CP26, chloroplast precursor (Light-harvesting complex II protein 5) (LHCB5) (LHCIIC) {Arabidopsis thaliana}; contains Pfam profile: PF00504 chlorophyll A-B binding protein; chlorophyll a/b-binding protein CP26 in PS II, Brassica juncea, gb:X95727   chr4:6408012-6409673 FORWARD   Aliases: CP 26, CP26, F24G24.140, F24G24_140, LIGHT HARVESTING COMPLEX OF PHOTOSYSTEM II 5 | 12.7 | 6.5  | 6.3  | 9.5  |
| 9708 AT3G14990.3   similar to DJ-1 family protein [Arabidopsis thaliana] (TAIR:At1g53280.1); similar to putative 4-methyl-5(B-hydroxyethyl)-thiazol monophosphate biosynthesis enzyme [Oryza sativa (japonica cultivar-group)] (GB:BAD54224.1); contains InterPro domain Protein of unknown function ThiJ/PfpI (InterPro:IPR002818); contains InterPro domain DJ-1 protein (InterPro:IPR006287)   chr3:5047407-5049884 FORWARD   Aliases: K15M2.13, K15M2_13                                                                                                                             | 12.7 | 11.8 | 0.9  | 2.5  |
| 93 AT3G09390.1   Symbol: MT2A   metallothionein protein, putative (MT2A), identical to Swiss-Prot:P25860 metallothionein-like protein 2A (MT-2A) (MT-K) (MT-1G) (Arabidopsis thaliana)   chr3:2889492-2890235 REVERSE   Aliases: ATMT 1, ATMT K, F3L24.28, METALLOTHIONEIN 2A, MT2                                                                                                                                                                                                                                                                                                       | 12.7 | 5.5  | 7.2  | 21.1 |
| 8748 AT5G37600.1   Symbol: ATGSR1                                                                                                                                                                                                                                                                                                                                                                                                                                                                                                                                                        | 12.7 | 13.4 | -0.7 | -2.8 |
| 20417 AT4G21960.1   Symbol: PRXR1   peroxidase 42 (PER42) (P42) (PRXR1), identical to SP:Q9SB81 Peroxidase 42 precursor (EC 1.11.1.7) (Atperox P42) (PRXR1) (ATP1a/ATP1b) {Arabidopsis thaliana}   chr4:11646186-11648373 REVERSE   Aliases: F1N20.3, PEROXIDASE PRXR1                                                                                                                                                                                                                                                                                                                   | 12.7 | 12.6 | 0.0  | 0.1  |
| 15411 AT5G54160.1   Symbol: ATOMT1                                                                                                                                                                                                                                                                                                                                                                                                                                                                                                                                                       | 12.6 | 12.3 | 0.3  | 1.1  |
| 1976 AT2G19760.1   Symbol: PRF1   profilin 1 (PRO1) (PFN1) (PRF1) / allergen Ara t 8, identical to profilin 1 (Allergen Ara t 8) SP:Q42449 GI:1353770 from (Arabidopsis thaliana)   chr2:8523869-8525249 REVERSE   Aliases: F6F22.21, F6F22_21, PFN1, PROFILIN 1                                                                                                                                                                                                                                                                                                                         | 12.6 | 11.0 | 1.6  | 7.4  |

|                                                                                                                                                                                                                                                                                                                                                                                                                                                                                                |      |      |      |      |
|------------------------------------------------------------------------------------------------------------------------------------------------------------------------------------------------------------------------------------------------------------------------------------------------------------------------------------------------------------------------------------------------------------------------------------------------------------------------------------------------|------|------|------|------|
| 5598 AT4G04830.1   methionine sulfoxide reductase domain-containing protein / SelR domain-containing protein, low similarity to pilin-like transcription factor (Homo sapiens) GI:5059062, SP:P14930 Peptide methionine sulfoxide reductase msrA/msrB (EC 1.8.4.6) {Neisseria gonorrhoeae}; contains Pfam profile PF01641: SelR domain   chr4:2445857-2447082 FORWARD   Aliases: T4B21.5, T4B21_5                                                                                              | 12.6 | 12.1 | 0.5  | 4.2  |
| 8263 AT5G53560.1   Symbol: ATB5 A                                                                                                                                                                                                                                                                                                                                                                                                                                                              | 12.6 | 12.1 | 0.5  | 3.0  |
| 1193 AT1G07600.1   Symbol: MT1A   metallothionein-like protein 1A (MT-1A) (MT-Q) (MT-2), identical to Metallothionein-like protein 1A (MT-1A) (MT-Q) (MT-2) SP:P43392 from (Arabidopsis thaliana)   chr1:2338901-2339318 REVERSE   Aliases: ATMT 2, ATMT Q, F22G5.2, LIGHT STRESS REGULATED 4, LSR4, METALLOTHIONEIN 1A, MT Q, MT1                                                                                                                                                             | 12.5 | 14.3 | -1.8 | -9.0 |
| 6902 NA                                                                                                                                                                                                                                                                                                                                                                                                                                                                                        | 12.5 | 13.1 | -0.5 | -3.6 |
| 684 AT3G16080.1   60S ribosomal protein L37 (RPL37C), similar to ribosomal protein L37 GB:BAA04888 from (Homo sapiens)   chr3:5454824-5455933 FORWARD   Aliases: MSL1.12                                                                                                                                                                                                                                                                                                                       | 12.5 | 10.4 | 2.1  | 10.8 |
| 1456 AT3G58610.1   ketol-acid reductoisomerase, identical to ketol-acid reductoisomerase, chloroplast precursor (EC 1.1.1.86) (Acetohydroxy-acid reductoisomerase) (Alpha-keto-beta-hydroxylacil reductoisomerase) (Swiss-Prot:Q05758) (Arabidopsis thaliana)   chr3:21682429-21685818 FORWARD   Aliases: F14P22.200, F14P22_200                                                                                                                                                               | 12.5 | 10.3 | 2.2  | 8.3  |
| 6425 AT1G47420.1   expressed protein, identical to hypothetical protein GB:AAD46040 GI:5668814 from (Arabidopsis thaliana)   chr1:17397958-17399693 REVERSE   Aliases: T3F24.12                                                                                                                                                                                                                                                                                                                | 12.5 | 10.4 | 2.1  | 3.8  |
| 10913 AT5G65020.1   Symbol: ANNAT2                                                                                                                                                                                                                                                                                                                                                                                                                                                             | 12.5 | 11.7 | 0.8  | 2.1  |
| 9552 AT5G41700.4   Symbol: UBC8   ubiquitin-conjugating enzyme 8 (UBC8), E2; identical to gi:297882, SP:P35131   chr5:16693070-16694737 FORWARD   Aliases: ATUBC8, MBK23.24, MBK23_24, UBC8, UBIQUITIN CONJUGATING ENZYME, UBIQUITIN CONJUGATING ENZYME 8                                                                                                                                                                                                                                      | 12.5 | 12.0 | 0.5  | 2.5  |
| 12625 AT3G57870.1   Symbol: AHUS5   ubiquitin-conjugating enzyme, putative, strong similarity to SP:P50550 Ubiquitin-like protein SUMO-1 conjugating enzyme (EC 6.3.2.19) (SUMO- 1-protein ligase) (Ubiquitin carrier protein) (Ubiquitin-conjugating enzyme UbcE2A) {Xenopus laevis}; contains Pfam profile PF00179: Ubiquitin-conjugating enzyme   chr3:21439624-21441155 REVERSE   Aliases: EMB1637, EMBRYO DEFECTIVE 1637, T10K17.80                                                       | 12.5 | 12.0 | 0.5  | 1.7  |
| 7396 AT3G08610.1   expressed protein   chr3:2615432-2616809 REVERSE   Aliases: F17O14.8                                                                                                                                                                                                                                                                                                                                                                                                        | 12.5 | 11.9 | 0.6  | 3.4  |
| 1820 AT5G18800.2   NADH-ubiquinone oxidoreductase 19 kDa subunit (NDUFA8) family protein, contains Pfam profile: PF05850 NADH-ubiquinone oxidoreductase 19 kDa subunit   chr5:6267067-6268616 FORWARD   Aliases: F17K4.50, F17K4_50                                                                                                                                                                                                                                                            | 12.4 | 11.0 | 1.4  | 7.7  |
| 5101 AT1G65980.2   Symbol: TPX1   similar to peroxiredoxin type 2, putative [Arabidopsis thaliana] (TAIR:At1g65970.1); similar to thioredoxin peroxidase 1 [Lycopersicon esculentum] (GB:AAP34571.1); similar to thioredoxin-dependent peroxidase [Plantago major] (GB:CAH58634.1); contains InterPro domain Alkyl hydroperoxide reductase/ Thiol specific antioxidant/ Mal allergen (InterPro:IPR000866)   chr1:24562969-24564599 REVERSE   Aliases: F12P19.14, F12P19_14, PEROXIREDOXIN TPX1 | 12.4 | 11.9 | 0.6  | 4.5  |
| 12456 AT2G02130.1   Symbol: LCR68/PDF2.3   plant defensin-fusion protein, putative (PDF2.3), plant defensin protein family member, personal communication, Bart Thomma (Bart.Thomma@agr.kuleuven.ac.be)   chr2:540017-540615 FORWARD   Aliases: F5O4.10, F5O4_10, LCR68, Low molecular weight cysteine rich 68, PDF2.3                                                                                                                                                                         | 12.4 | 12.2 | 0.2  | 1.7  |
| 12100 AT1G08830.1   Symbol: CSD1   superoxide dismutase (Cu-Zn) (SODCC) / copper/zinc superoxide dismutase (CSD1), identical to SWISS-PROT: P24704   chr1:2827089-2829260 FORWARD   Aliases: F22O13.32, F22O13_32                                                                                                                                                                                                                                                                              | 12.4 | 11.8 | 0.6  | 1.8  |
| 1472 AT1G18210.2   calcium-binding protein, putative, similar to SP:Q9M7R0 Calcium-binding allergen Ole e 8 (PCA18/PCA23) {Olea europaea}; contains INTERPRO:IPR002048 calcium-binding EF-hand domain   chr1:6266602-6268821 REVERSE   Aliases: T10F20.22                                                                                                                                                                                                                                      | 12.4 | 8.8  | 3.6  | 8.3  |
| 5849 AT4G33865.1   40S ribosomal protein S29 (RPS29C)   chr4:16233214-16234201 REVERSE   Aliases: None                                                                                                                                                                                                                                                                                                                                                                                         | 12.4 | 11.8 | 0.6  | 4.1  |
| 18782 NA                                                                                                                                                                                                                                                                                                                                                                                                                                                                                       | 12.4 | 12.5 | -0.1 | -0.4 |
| 2064 AT2G24940.1   cytochrome b5 domain-containing protein, similar to SP:P70580 Membrane associated progesterone receptor component 1 {Rattus norvegicus}; contains Pfam profile PF00173: Heme/Steroid binding domain   chr2:10616473-10619311 FORWARD   Aliases: F27C12.14, F27C12_14                                                                                                                                                                                                        | 12.4 | 10.1 | 2.3  | 7.3  |
| 2065 AT2G24945.1   expressed protein   chr2:10616492-10619311 FORWARD   Aliases: None                                                                                                                                                                                                                                                                                                                                                                                                          | 12.4 | 10.1 | 2.3  | 7.3  |
| 19546 AT1G13440.1   glyceraldehyde 3-phosphate dehydrogenase, cytosolic, putative / NAD-dependent glyceraldehyde-3-phosphate dehydrogenase, putative, very strong similarity to SP:P25858 Glyceraldehyde 3-phosphate dehydrogenase, cytosolic (EC 1.2.1.12) {Arabidopsis thaliana}; contains Pfam profiles PF02800: Glyceraldehyde 3-phosphate dehydrogenase C-terminal domain, PF00044: Glyceraldehyde 3-phosphate dehydrogenase NAD binding domain                                           | 12.4 | 12.3 | 0.1  | 0.3  |



|                                                                                                                                                                                                                                                                                                                                                                                                                                                                                                                                                                                                                                                                                                                                                                                                                                                                                                      |      |      |      |      |
|------------------------------------------------------------------------------------------------------------------------------------------------------------------------------------------------------------------------------------------------------------------------------------------------------------------------------------------------------------------------------------------------------------------------------------------------------------------------------------------------------------------------------------------------------------------------------------------------------------------------------------------------------------------------------------------------------------------------------------------------------------------------------------------------------------------------------------------------------------------------------------------------------|------|------|------|------|
| 922 AT3G46010.1   Symbol: ADF1   actin-depolymerizing factor 1 (ADF1), identical to SP:Q39250 Actin-depolymerizing factor 1 (ADF-1) (AtADF1) {Arabidopsis thaliana}   chr3:16920391-16921805 REVERSE   Aliases: ACTIN DEPOLYMERIZING FACTOR 1, ATADF, ATADF1, F16L2.220                                                                                                                                                                                                                                                                                                                                                                                                                                                                                                                                                                                                                              | 12.4 | 10.0 | 2.4  | 9.8  |
| 1576 AT5G56795.1   Symbol: MT1B   one of the five metallothioneins (MTs) genes identified in Arabidopsis. MTs are cysteine-rich proteins required for heavy metal tolerance. The MT1b gene, however, is indicated to be inactive.   chr5:22988283-22990379 REVERSE   Aliases: None                                                                                                                                                                                                                                                                                                                                                                                                                                                                                                                                                                                                                   | 12.4 | 14.3 | -1.9 | -8.1 |
| 505 AT3G05560.2   60S ribosomal protein L22-2 (RPL22B), identical to 60S ribosomal protein L22-2 SP:Q9M9W1 from (Arabidopsis thaliana)   chr3:1614221-1615449 FORWARD   Aliases: F18C1.17, F18C1_17                                                                                                                                                                                                                                                                                                                                                                                                                                                                                                                                                                                                                                                                                                  | 12.4 | 10.0 | 2.4  | 11.9 |
| 18455 AT3G02360.2   6-phosphogluconate dehydrogenase family protein, contains Pfam profiles: PF00393 6-phosphogluconate dehydrogenase C-terminal domain, PF03446 NAD binding domain of 6-phosphogluconate ;similar to 6-phosphogluconate dehydrogenase GB:BAA22812 GI:2529229 (Glycine max)   chr3:482035-484154 FORWARD   Aliases: F11A12.5, F11A12_5                                                                                                                                                                                                                                                                                                                                                                                                                                                                                                                                               | 12.4 | 12.5 | -0.1 | -0.5 |
| 12330 AT1G04410.1   malate dehydrogenase, cytosolic, putative, strong similarity to malate dehydrogenase from Mesembryanthemum crystallinum (SP:O24047), Medicago sativa (SP:O48905), Prunus persica (GI:15982948); contains InterPro entry IPR001236: Lactate/malate dehydrogenase   chr1:1189077-1191411 REVERSE   Aliases: F19P19.13, F19P19_13                                                                                                                                                                                                                                                                                                                                                                                                                                                                                                                                                   | 12.4 | 11.6 | 0.8  | 1.7  |
| 4590 AT3G09630.2   similar to 60S ribosomal protein L4/L1 (RPL4D) [Arabidopsis thaliana] (TAIR:At5g02870.1); similar to PREDICTED OJ1014_E09.28 gene product [Oryza sativa (japonica cultivar-group)] (GB:XP_507356.1); contains InterPro domain Ribosomal protein L4/L1e (InterPro:IPR002136)   chr3:2953742-2955753 FORWARD   Aliases: F11F8.22                                                                                                                                                                                                                                                                                                                                                                                                                                                                                                                                                    | 12.3 | 11.2 | 1.2  | 4.8  |
| 1106 AT2G46540.1   expressed protein   chr2:19117544-19118841 REVERSE   Aliases: F13A10.7, F13A10_7                                                                                                                                                                                                                                                                                                                                                                                                                                                                                                                                                                                                                                                                                                                                                                                                  | 12.3 | 11.5 | 0.8  | 9.2  |
| 15380 NA                                                                                                                                                                                                                                                                                                                                                                                                                                                                                                                                                                                                                                                                                                                                                                                                                                                                                             | 12.3 | 12.2 | 0.1  | 1.1  |
| 19776 AT3G08580.2   Symbol: AAC1   ADP, ATP carrier protein 1, mitochondrial / ADP/ATP translocase 1 / adenine nucleotide translocator 1 (ANT1), identical to SWISS-PROT:P31167 ADP,ATP carrier protein 1 (Adenine nucleotide translocator 1) (Arabidopsis thaliana)   chr3:2605448-2607793 REVERSE   Aliases: ADP/ATP CARRIER 1, F17O14.5                                                                                                                                                                                                                                                                                                                                                                                                                                                                                                                                                           | 12.3 | 12.4 | -0.1 | -0.2 |
| 10998 NA                                                                                                                                                                                                                                                                                                                                                                                                                                                                                                                                                                                                                                                                                                                                                                                                                                                                                             | 12.3 | 12.7 | -0.3 | -2.1 |
| 5373 AT4G35460.1   Symbol: NTR1   thioredoxin reductase 1 / NADPH-dependent thioredoxin reductase 1 (NTR1), identical to SP:Q39243                                                                                                                                                                                                                                                                                                                                                                                                                                                                                                                                                                                                                                                                                                                                                                   | 12.3 | 12.9 | -0.5 | -4.4 |
| 5372 AT2G17420.1   Symbol: NTRA   similar to thioredoxin reductase 1 / NADPH-dependent thioredoxin reductase 1 (NTR1) [Arabidopsis thaliana] (TAIR:At4g35460.1); similar to NADPH-thioredoxin reductase [Triticum aestivum] (GB:CAD19162.1); contains InterPro domain Thioredoxin reductase (InterPro:IPR005982); contains InterPro domain Pyridine nucleotide-disulphide oxidoreductase, class I (InterPro:IPR001100); contains InterPro domain FAD-dependent pyridine nucleotide-disulphide oxidoreductase (InterPro:IPR001327); contains InterPro domain Pyridine nucleotide-disulphide oxidoreductase, class-II, active site (InterPro:IPR008255); contains InterPro domain Adrenodoxin reductase (InterPro:IPR000759); contains InterPro domain Pyridine nucleotide-disulphide oxidoreductase, class-II (InterPro:IPR000103)   chr2:7571427-7573621 FORWARD   Aliases: ATNTRA, F5J6.18, F5J6_18 | 12.3 | 12.9 | -0.5 | -4.4 |
| 206 AT5G02240.1   expressed protein   chr5:451421-453155 FORWARD   Aliases: T1E22.5                                                                                                                                                                                                                                                                                                                                                                                                                                                                                                                                                                                                                                                                                                                                                                                                                  | 12.3 | 8.6  | 3.7  | 16.5 |
| 429 AT3G52590.1   Symbol: UBI1   ubiquitin extension protein 1 (UBI1) / 60S ribosomal protein L40 (RPL40B), identical to GI:166929, GI:166930   chr3:19516614-19517910 FORWARD   Aliases: EMB2167, EMBRYO DEFECTIVE 2167, F3C22.8, UBIQUITIN EXTENSION PROTEIN 1                                                                                                                                                                                                                                                                                                                                                                                                                                                                                                                                                                                                                                     | 12.3 | 10.0 | 2.3  | 12.6 |
| 4674 AT2G42680.1   ethylene-responsive transcriptional coactivator, putative, similar to ethylene-responsive transcriptional coactivator (Lycopersicon esculentum) gi:5669634:gb:AAD46402   chr2:17781980-17783387 FORWARD   Aliases: F14N22.5, F14N22_5                                                                                                                                                                                                                                                                                                                                                                                                                                                                                                                                                                                                                                             | 12.3 | 11.2 | 1.1  | 4.8  |
| 651 AT1G15930.2   40S ribosomal protein S12 (RPS12A), similar to 40S ribosomal protein S12 GI:4263712 from (Arabidopsis thaliana)   chr1:5471431-5472978 FORWARD   Aliases: T24D18.3, T24D18_3                                                                                                                                                                                                                                                                                                                                                                                                                                                                                                                                                                                                                                                                                                       | 12.3 | 10.3 | 2.0  | 11.0 |
| 5859 AT1G01470.1   Symbol: LEA14   late embryogenesis abundant protein, putative / LEA protein, putative, similar to SP:P46518 Late embryogenesis abundant protein Lea14-A {Gossypium hirsutum}; contains Pfam profile PF03168: Late embryogenesis abundant protein   chr1:172146-172923 REVERSE   Aliases: F22L4.3, F22L4_3, LATE EMBRYOGENESIS ABUNDANT 14, LIGHT STRESS REGULATED 3, LSR3                                                                                                                                                                                                                                                                                                                                                                                                                                                                                                         | 12.3 | 10.4 | 2.0  | 4.1  |
| 3854 AT1G54630.2   Symbol: ACP3   similar to acyl carrier protein, chloroplast, putative / ACP, putative [Arabidopsis thaliana] (TAIR:At1g54580.1); similar to acyl carrier protein [Brassica napus] (GB:CAA34248.1); contains InterPro domain Phosphopantetheine-binding domain (InterPro:IPR006163); contains InterPro domain Acyl carrier protein (ACP) (InterPro:IPR003231)   chr1:20405044-20406671 REVERSE   Aliases: ACYL CARRIER PROTEIN 3, T22H22.7, T22H22_7                                                                                                                                                                                                                                                                                                                                                                                                                               | 12.3 | 11.2 | 1.1  | 5.4  |
| 3853 AT1G54580.1   Symbol: ACP2   acyl carrier protein, chloroplast, putative / ACP, putative, strong similarity to SP:P25701 Acyl carrier protein 2, chloroplast precursor (ACP) {Arabidopsis thaliana}; contains InterPro accession IPR003881: Isochorismatase   chr1:20393100-20394682 FORWARD   Aliases: ACYL CARRIER PROTEIN 2, T22H22.3, T22H22_3                                                                                                                                                                                                                                                                                                                                                                                                                                                                                                                                              | 12.3 | 11.2 | 1.1  | 5.4  |

|                                                                                                                                                                                                                                                                                                                                                                                                                                                                                                                                                                                                                         |      |      |      |      |
|-------------------------------------------------------------------------------------------------------------------------------------------------------------------------------------------------------------------------------------------------------------------------------------------------------------------------------------------------------------------------------------------------------------------------------------------------------------------------------------------------------------------------------------------------------------------------------------------------------------------------|------|------|------|------|
| 8793 AT2G18960.1   Symbol: AHA1   ATPase 1, plasma membrane-type, putative / proton pump 1, putative / proton-exporting ATPase, putative, strong similarity to SP:P20649 ATPase 1, plasma membrane-type (EC 3.6.3.6) (Proton pump 1) {Arabidopsis thaliana}; contains InterPro accession IPR001757: ATPase, E1-E2 type; contains Pfam profile PF00690: Cation transporter/ATPase, N-terminus   chr2:8228713-8234701 FORWARD   Aliases: F19F24.16, F19F24_16, PLASMA MEMBRANE PROTON ATPASE, PMA                                                                                                                         | 12.3 | 11.4 | 0.9  | 2.8  |
| 3445 AT3G01130.1   expressed protein   chr3:44491-45597 REVERSE   Aliases: T4P13.18, T4P13_18                                                                                                                                                                                                                                                                                                                                                                                                                                                                                                                           | 12.3 | 11.2 | 1.1  | 5.7  |
| 7375 AT5G64400.2   expressed protein, similar to expressed protein [Arabidopsis thaliana] (TAIR:At5g09570.1); similar to unknown protein [Oryza sativa] (GB:XP_469336.1); contains InterPro domain Protein of unknown function DUF657 (InterPro:IPR007017)   chr5:25766066-25767582 FORWARD   Aliases: MSJ1.24, MSJ1_24                                                                                                                                                                                                                                                                                                 | 12.3 | 11.4 | 0.9  | 3.4  |
| 10839 AT1G65930.1   isocitrate dehydrogenase, putative / NADP+ isocitrate dehydrogenase, putative, strong similarity to isocitrate dehydrogenase SP:Q40345 from (Medicago sativa)   chr1:24542587-24545790 FORWARD   Aliases: F12P19.10, F12P19_10                                                                                                                                                                                                                                                                                                                                                                      | 12.3 | 12.7 | -0.4 | -2.1 |
| 7635 NA                                                                                                                                                                                                                                                                                                                                                                                                                                                                                                                                                                                                                 | 12.2 | 12.9 | -0.6 | -3.3 |
| 904 AT1G69620.1   Symbol: RPL34   60S ribosomal protein L34 (RPL34B), similar to SP:Q42351 from (Arabidopsis thaliana)   chr1:26193501-26194986 FORWARD   Aliases: F24J1.23, RIBOSOMAL PROTEIN L34, RPL34                                                                                                                                                                                                                                                                                                                                                                                                               | 12.2 | 10.7 | 1.6  | 9.9  |
| 630 AT4G09320.1   Symbol: NDPK1   nucleoside diphosphate kinase 1 (NDK1), identical to identical to Nucleoside diphosphate kinase I (NDK I) (NDP kinase I) (NDPK I) (SP:P39207) (Arabidopsis thaliana); contains Pfam PF00334 : Nucleoside diphosphate kinase domain;   chr4:5923397-5924529 FORWARD   Aliases: T30A10.80, T30A10_80                                                                                                                                                                                                                                                                                    | 12.2 | 10.7 | 1.5  | 11.1 |
| 438 AT1G18540.1   60S ribosomal protein L6 (RPL6A), similar to 60S ribosomal protein L6 GI:7208784 from (Cicer arietinum)   chr1:6377314-6378571 REVERSE   Aliases: F25I16.12, F25I16_12                                                                                                                                                                                                                                                                                                                                                                                                                                | 12.2 | 10.3 | 2.0  | 12.5 |
| 17718 AT3G48140.1   senescence-associated protein, putative, similar to B12D protein (Ipomoea batatas) GB:AAD22104   chr3:17789385-17790534 FORWARD   Aliases: T24C20.20                                                                                                                                                                                                                                                                                                                                                                                                                                                | 12.2 | 12.1 | 0.1  | 0.6  |
| 1337 AT5G59890.2   Symbol: ADF4   actin-depolymerizing factor 4 (ADF4), identical to SP:Q9ZSK3 Actin-depolymerizing factor 4 (ADF-4) (AtADF4) {Arabidopsis thaliana}   chr5:24139827-24141138 FORWARD   Aliases: ACTIN DEPOLYMERIZING FACTOR 4, MMN10.8, MMN10_8                                                                                                                                                                                                                                                                                                                                                        | 12.2 | 7.3  | 5.0  | 8.6  |
| 4151 AT5G47570.1   expressed protein   chr5:19309839-19311962 REVERSE   Aliases: MNJ7.16, MNJ7_16                                                                                                                                                                                                                                                                                                                                                                                                                                                                                                                       | 12.2 | 11.0 | 1.2  | 5.1  |
| 2805 AT3G53730.1   histone H4, identical to histone H4 from Lycopersicon esculentum GI:297150, Lolium temulentum SP:P02308, Acropora formosa GI:455652, Citrus jambhiri GI:16797797                                                                                                                                                                                                                                                                                                                                                                                                                                     | 12.2 | 10.3 | 1.9  | 6.4  |
| 4079 AT1G13060.1   Symbol: PBE1   20S proteasome beta subunit E1 (PBE1) (PRCE), identical to GB:O23717; identical to cDNA proteasome subunit prce GI:2511595   chr1:4452269-4454872 FORWARD   Aliases: 20S PROTEASOME BETA SUBUNIT PBE1, F3F19.8, F3F19_8                                                                                                                                                                                                                                                                                                                                                               | 12.2 | 10.5 | 1.7  | 5.2  |
| 4080 AT3G26340.1   20S proteasome beta subunit E, putative, very strong similarity to SP:O23717 Proteasome subunit beta type 5 precursor (EC 3.4.25.1) (20S proteasome subunit E) (Proteasome epsilon chain) {Arabidopsis thaliana}                                                                                                                                                                                                                                                                                                                                                                                     | 12.2 | 10.5 | 1.7  | 5.2  |
| 15871 AT2G36530.1   Symbol: LOS2   enolase, identical to SWISS-PROT:P25696 enolase (EC 4.2.1.11) (2-phosphoglycerate dehydratase)(2-phospho-D- glycerate hydro-lyase) (Arabidopsis thaliana)   chr2:15327835-15330945 REVERSE   Aliases: F1O11.16, F1O11_16                                                                                                                                                                                                                                                                                                                                                             | 12.2 | 11.8 | 0.4  | 1.0  |
| 11681 AT2G47380.1   cytochrome c oxidase subunit Vc family protein / COX5C family protein, contains Pfam profile: PF05799 cytochrome c oxidase subunit Vc (COX5C)   chr2:19448025-19449123 FORWARD   Aliases: T8I13.22                                                                                                                                                                                                                                                                                                                                                                                                  | 12.2 | 11.8 | 0.4  | 1.9  |
| 3104 AT1G23820.2   Symbol: SPDS1   spermidine synthase 1 (SPDSYN1) / putrescine aminopropyltransferase 1, identical to SP:Q9ZUB3 Spermidine synthase 1 (EC 2.5.1.16) (Putrescine aminopropyltransferase 1) (SPDSY 1) {Arabidopsis thaliana}   chr1:8420276-8422928 FORWARD   Aliases: F5O8.38, F5O8_38, SPERMIDINE SYNTHASE 1                                                                                                                                                                                                                                                                                           | 12.2 | 10.5 | 1.7  | 6.0  |
| 212 AT2G36170.1   ubiquitin extension protein 2 (UBQ2) / 60S ribosomal protein L40 (RPL40A), identical to GI:166930, GI:166931   chr2:15179196-15180358 FORWARD   Aliases: F9C22.10, F9C22_10                                                                                                                                                                                                                                                                                                                                                                                                                           | 12.2 | 8.5  | 3.6  | 16.2 |
| 2534 AT1G48830.2   40S ribosomal protein S7 (RPS7A), similar to 40S ribosomal protein S7 homolog GI:5532505 from (Brassica oleracea)   chr1:18063304-18064925 REVERSE   Aliases: F11I4.1, F11I4_1                                                                                                                                                                                                                                                                                                                                                                                                                       | 12.2 | 10.5 | 1.6  | 6.6  |
| 5663 AT5G08300.1   succinyl-CoA ligase (GDP-forming) alpha-chain, mitochondrial, putative / succinyl-CoA synthetase, alpha chain, putative / SCS-alpha, putative, identical to SP:P53586 Succinyl-CoA ligase (GDP-forming) alpha-chain, mitochondrial precursor (EC 6.2.1.4) (Succinyl-CoA synthetase, alpha chain) (SCS-alpha) {Arabidopsis thaliana}; strong similarity to SP:P13086 Succinyl-CoA ligase (GDP-forming) alpha-chain, mitochondrial precursor {Rattus norvegicus}; contains Pfam profiles PF00549: CoA-ligase, PF02629: CoA binding domain   chr5:2667471-2669918 FORWARD   Aliases: F8L15.30, F8L15_30 | 12.1 | 10.3 | 1.9  | 4.2  |

|                                                                                                                                                                                                                                                                                                                                                                                                                                                                         |      |      |      |      |
|-------------------------------------------------------------------------------------------------------------------------------------------------------------------------------------------------------------------------------------------------------------------------------------------------------------------------------------------------------------------------------------------------------------------------------------------------------------------------|------|------|------|------|
| 3288 AT1G51650.1   ATP synthase epsilon chain, mitochondrial, identical to ATP synthase epsilon chain, mitochondrial SP:Q96253 from (Arabidopsis thaliana)   chr1:19156283-19157597 FORWARD   Aliases: F19C24.25, F19C24_25                                                                                                                                                                                                                                             | 12.1 | 11.5 | 0.6  | 5.8  |
| 16369 AT3G62290.1   Gene encoding ADP-ribosylation factor and similar to other ARFs and ARF-like proteins. Members of this family are known to be essential for vesicle coating and uncoating and functions in GTP-binding. The gene is shown to play a role in cell division, cell expansion and cellulose production using antisense construct.   chr3:23062627-23064719 FORWARD   Aliases: T17J13.250                                                                | 12.1 | 12.4 | -0.2 | -0.9 |
| 2644 AT4G29480.1   mitochondrial ATP synthase g subunit family protein, contains Pfam profile: PF04718 mitochondrial ATP synthase g subunit                                                                                                                                                                                                                                                                                                                             | 12.1 | 10.4 | 1.7  | 6.5  |
| 4422 AT2G47170.1   Symbol: ARF1   Gene encoding ADP-ribosylation factor and similar to other ARFs and ARF-like proteins. Members of this family are known to be essential for vesicle coating and uncoating and functions in GTP-binding. The gene is shown to play a role in cell division, cell expansion and cellulose production using antisense construct.   chr2:19373694-19375870 FORWARD   Aliases: ADP RIBOSYLATION FACTOR, ADP RIBOSYLATION FACTOR 1, T8I13.1 | 12.1 | 10.6 | 1.6  | 4.9  |
| 9374 AT1G31910.1   GHMP kinase family protein, contains TIGRFAM profile TIGR01219: phosphomevalonate kinase; contains Pfam PF00288: GHMP kinases putative ATP-binding protein domain; similar to Phosphomevalonate kinase (EC 2.7.4.2) (Swiss-Prot:P24521) (Saccharomyces cerevisiae)   chr1:11459030-11461805 FORWARD   Aliases: F5M6.9, F5M6_9                                                                                                                        | 12.1 | 11.8 | 0.3  | 2.6  |
| 914 AT1G22840.1   cytochrome c, putative, similar to cytochrome c (Pumpkin, Winter squash) SWISS-PROT:P00051   chr1:8079279-8080563 FORWARD   Aliases: F19G10.20, F19G10_20                                                                                                                                                                                                                                                                                             | 12.1 | 10.3 | 1.9  | 9.8  |
| 17203 AT1G45145.1   Symbol: ATTRX5                                                                                                                                                                                                                                                                                                                                                                                                                                      | 12.1 | 11.9 | 0.2  | 0.7  |
| 1463 AT1G67430.1   60S ribosomal protein L17 (RPL17B), similar to ribosomal protein Gl:19101 from (Hordeum vulgare)                                                                                                                                                                                                                                                                                                                                                     | 12.1 | 10.0 | 2.1  | 8.3  |
| 6481 AT5G51970.2   sorbitol dehydrogenase, putative / L-iditol 2-dehydrogenase, putative, similar to NAD-dependent sorbitol dehydrogenase from Malus x domestica (gi:4519539)   chr5:21128820-21130629 FORWARD   Aliases: MSG15.7, MSG15_7                                                                                                                                                                                                                              | 12.1 | 10.9 | 1.2  | 3.8  |
| 996 AT3G12780.1   Symbol: PGK1   phosphoglycerate kinase, putative, similar to SP:P41758 Phosphoglycerate kinase, chloroplast precursor (EC 2.7.2.3) {Chlamydomonas reinhardtii}; contains Pfam profile PF00162: phosphoglycerate kinase   chr3:4060978-4063230 REVERSE   Aliases: MBK21.15, PHOSPHOGLYCERATE KINASE 1                                                                                                                                                  | 12.1 | 7.9  | 4.2  | 9.6  |
| 1445 AT2G45070.3   Symbol: SEC61 BETA   similar to sec61beta family protein [Arabidopsis thaliana] (TAIR:At3g60540.1); similar to sec61beta family protein [Arabidopsis thaliana] (TAIR:At3g60540.2); similar to GA10096-PA [Drosophila pseudoobscura] (GB:EAL25183.1); contains InterPro domain Sec61beta (InterPro:IPR005609)   chr2:18594092-18595334 REVERSE   Aliases: SEC 61 BETA SUBUNIT, T14P1.12                                                               | 12.1 | 10.6 | 1.5  | 8.3  |
| 1869 AT5G47930.1   40S ribosomal protein S27 (RPS27D)   chr5:19423403-19424624 REVERSE   Aliases: K16F13.2, K16F13_2                                                                                                                                                                                                                                                                                                                                                    | 12.1 | 10.2 | 1.9  | 7.6  |
| 989 AT5G54770.1   Symbol: THI1   thiazole biosynthetic enzyme, chloroplast (ARA6) (THI1) (THI4), identical to SP:Q38814 Thiazole biosynthetic enzyme, chloroplast precursor (ARA6) {Arabidopsis thaliana}                                                                                                                                                                                                                                                               | 12.1 | 6.6  | 5.5  | 9.6  |
| 12173 AT1G48750.1   protease inhibitor/seed storage/lipid transfer protein (LTP) family protein, similar to TED4 (Zinnia elegans) Gl:493721; contains Pfam protease inhibitor/seed storage/LTP family domain PF00234                                                                                                                                                                                                                                                    | 12.1 | 11.6 | 0.5  | 1.8  |
| 3232 AT5G03850.1   40S ribosomal protein S28 (RPS28B), ribosomal protein S28, Arabidopsis thaliana, EMBL:ATRP28A   chr5:1028339-1029120 REVERSE   Aliases: MED24.14                                                                                                                                                                                                                                                                                                     | 12.1 | 11.0 | 1.1  | 5.9  |
| 775 AT1G77940.1   60S ribosomal protein L30 (RPL30B), similar to ribosomal protein L30 Gl:388034 from (Homo sapiens)   chr1:29308791-29310259 REVERSE   Aliases: F28K19.15, F28K19_15                                                                                                                                                                                                                                                                                   | 12.1 | 10.3 | 1.8  | 10.4 |
| 10994 AT5G08290.1   Symbol: YLS8   yellow-leaf-specific protein 8 (YLS8) / mitosis protein DIM1, putative, contains Pfam domain PF02966: Mitosis protein DIM1; identical to cDNA YLS8 mRNA for Dim1 homolog Gl:13122293   chr5:2665977-2667156 FORWARD   Aliases: F8L15.20, F8L15_20                                                                                                                                                                                    | 12.1 | 11.6 | 0.5  | 2.1  |
| 3676 AT4G32470.2   ubiquinol-cytochrome C reductase complex 14 kDa protein, putative, similar to SP:P48502 Ubiquinol-cytochrome C reductase complex 14 kDa protein (EC 1.10.2.2) (CR14) {Solanum tuberosum}; contains Pfam profile PF02271: Ubiquinol-cytochrome C reductase complex 14kD subunit   chr4:15669225-15671200 REVERSE   Aliases: F8B4.170, F8B4_170                                                                                                        | 12.1 | 10.7 | 1.4  | 5.5  |
| 1074 AT3G15353.1   Symbol: MT3   metallothionein protein, putative                                                                                                                                                                                                                                                                                                                                                                                                      | 12.1 | 8.0  | 4.1  | 9.3  |
| 1168 AT4G24830.1   arginosuccinate synthase family, contains Pfam profile: PF00764 arginosuccinate synthase                                                                                                                                                                                                                                                                                                                                                             | 12.1 | 7.2  | 4.9  | 9.1  |
| 8232 AT2G33040.1   ATP synthase gamma chain, mitochondrial (ATPC), identical to SP:Q96250 ATP synthase gamma chain, mitochondrial precursor (EC 3.6.3.14) {Arabidopsis thaliana}; contains Pfam profile: PF00231 ATP synthase   chr2:14025857-14028257 REVERSE   Aliases: F25I18.22, F25I18_22, T21L14.5                                                                                                                                                                | 12.0 | 11.0 | 1.0  | 3.0  |



|                                                                                                                                                                                                                                                                                                                                                                                                                                                                                   |      |      |      |      |
|-----------------------------------------------------------------------------------------------------------------------------------------------------------------------------------------------------------------------------------------------------------------------------------------------------------------------------------------------------------------------------------------------------------------------------------------------------------------------------------|------|------|------|------|
| 7475 NA                                                                                                                                                                                                                                                                                                                                                                                                                                                                           | 12.0 | 12.6 | -0.5 | -3.3 |
| 3711 NA                                                                                                                                                                                                                                                                                                                                                                                                                                                                           | 12.0 | 10.7 | 1.3  | 5.5  |
| 68 AT2G30570.2   photosystem II reaction center W (PsbW) protein-related, similar to photosystem II reaction center W protein SP:Q41387 from ( <i>Spinacia oleracea</i> )   chr2:13025520-13027271 REVERSE   Aliases: T6B20.8, T6B20_8                                                                                                                                                                                                                                            | 12.0 | 5.6  | 6.4  | 23.5 |
| 1134 AT1G74050.1   60S ribosomal protein L6 (RPL6C), similar to 60S ribosomal protein L6 (YL 16 like) GB:CAB57309 from ( <i>Cyanophora paradoxa</i> )   chr1:27850710-27852467 REVERSE   Aliases: F2P9.8, F2P9_8                                                                                                                                                                                                                                                                  | 12.0 | 11.1 | 1.0  | 9.1  |
| 1135 AT1G74060.1   60S ribosomal protein L6 (RPL6B), similar to 60S ribosomal protein L6 (YL 16 like) GB:CAB57309 from ( <i>Cyanophora paradoxa</i> )   chr1:27853497-27855028 REVERSE   Aliases: F2P9.7, F2P9_7                                                                                                                                                                                                                                                                  | 12.0 | 11.1 | 1.0  | 9.1  |
| 19676 AT3G13520.1   Symbol: AGP12   arabinogalactan-protein (AGP12), identical to gi:10880501:gb:AAG24280   chr3:4408932-4409447 FORWARD   Aliases: ARABINO GALACTAN PROTEIN 12, MRP15.18                                                                                                                                                                                                                                                                                         | 12.0 | 12.1 | -0.0 | -0.3 |
| 2354 AT5G56710.1   60S ribosomal protein L31 (RPL31C)   chr5:22961062-22962196 REVERSE   Aliases: MIK19.16, MIK19_16                                                                                                                                                                                                                                                                                                                                                              | 12.0 | 10.2 | 1.8  | 6.9  |
| 5093 AT2G23090.1   expressed protein   chr2:9836530-9837490 REVERSE   Aliases: F21P24.15                                                                                                                                                                                                                                                                                                                                                                                          | 12.0 | 10.9 | 1.1  | 4.5  |
| 11643 AT3G01120.1   Symbol: MTO1   cystathionine gamma-synthase, chloroplast / O-succinylhomoserine (Thiol)-lyase (CGS), identical to SP:P55217 Cystathionine gamma-synthase, chloroplast precursor (EC 4.2.99.9) (CGS) (O-succinylhomoserine (Thiol)-lyase) { <i>Arabidopsis thaliana</i> }                                                                                                                                                                                      | 12.0 | 11.4 | 0.6  | 1.9  |
| 5309 AT5G12140.1   Symbol: ATCYS1                                                                                                                                                                                                                                                                                                                                                                                                                                                 | 12.0 | 10.8 | 1.1  | 4.4  |
| 1198 AT2G31490.1   expressed protein   chr2:13419060-13420323 FORWARD   Aliases: T28P16.2, T28P16_2                                                                                                                                                                                                                                                                                                                                                                               | 12.0 | 10.4 | 1.5  | 9.0  |
| 8294 AT2G28910.1   Symbol: CXIP4   CAX-interacting protein 4 (CAXIP4), contains Pfam domain PF00098: Zinc knuckle; identical to cDNA CAX-interacting protein 4 GI:27651998                                                                                                                                                                                                                                                                                                        | 12.0 | 12.7 | -0.7 | -3.0 |
| 579 AT3G53020.1   60S ribosomal protein L24 (RPL24B), 60S ribosomal protein L24, <i>Arabidopsis thaliana</i> , EMBL:AC006282   chr3:19671545-19673003 REVERSE   Aliases: F8J2.190                                                                                                                                                                                                                                                                                                 | 12.0 | 10.3 | 1.6  | 11.4 |
| 13048 AT3G12760.1   expressed protein, similar to RP42 protein ( <i>Homo sapiens</i> ) GI:9896486; contains Pfam profile PF00627: UBA/TS-N domain, PF03556: Domain of unknown function (DUF298)   chr3:4054746-4056987 FORWARD   Aliases: MBK21.14                                                                                                                                                                                                                                | 12.0 | 11.7 | 0.3  | 1.6  |
| 527 AT4G29390.1   40S ribosomal protein S30 (RPS30B), RIBOSOMAL PROTEIN S30 - <i>Arabidopsis thaliana</i> , PID:e1358183   chr4:14464993-14465989 REVERSE   Aliases: F17A13.210, F17A13_210                                                                                                                                                                                                                                                                                       | 12.0 | 10.1 | 1.9  | 11.8 |
| 7524 AT1G23190.1   phosphoglucomutase, cytoplasmic, putative / glucose phosphomutase, putative, strong similarity to SP:P93805 Phosphoglucomutase, cytoplasmic 2 (EC 5.4.2.2) (Glucose phosphomutase 2) (PGM 2) { <i>Zea mays</i> }; contains InterPro accession IPR006352: Phosphoglucosamine mutase   chr1:8219879-8224458 FORWARD   Aliases: T26J12.5, T26J12_5                                                                                                                | 11.9 | 9.6  | 2.3  | 3.3  |
| 1482 AT4G10100.2   Symbol: CNX7/SIR5   molybdenum cofactor synthesis family protein, similar to Molybdenum cofactor synthesis protein 2 small subunit (Molybdopterinsynthase small subunit) (MOC52A) (MOCO1-A) (Swiss-Prot:O96033) ( <i>Homo sapiens</i> ); contains TIGRFAM TIGR01682: molybdopterinsynthase converting factor, subunit 1; contains Pfam PF02597: ThiS family   chr4:6308712-6309504 FORWARD   Aliases: CNX7, F28M11.20, F28M11_20, MOLYBDOPTERIN SYNTHASE, SIR5 | 11.9 | 10.8 | 1.1  | 8.3  |
| 14026 AT4G26970.1   aconitate hydratase, cytoplasmic, putative / citrate hydro-lyase/aconitase, putative, strong similarity to SP:P49608 Aconitate hydratase, cytoplasmic (EC 4.2.1.3) (Citrate hydro-lyase) (Aconitase) { <i>Cucurbita maxima</i> }; contains Pfam profiles PF00330: Aconitase family (aconitate hydratase), PF00694: Aconitase C-terminal domain   chr4:13542924-13549101 FORWARD   Aliases: F10M23.310, F10M23_310                                             | 11.9 | 12.1 | -0.2 | -1.4 |
| 3652 AT1G66580.1   60S ribosomal protein L10 (RPL10C), contains Pfam profile: PF00826: Ribosomal L10   chr1:24842828-24844275 FORWARD   Aliases: T12I7.3, T12I7_3                                                                                                                                                                                                                                                                                                                 | 11.9 | 10.7 | 1.2  | 5.5  |
| 3200 AT5G24660.1   expressed protein   chr5:8443282-8443837 REVERSE   Aliases: MXC17.2, MXC17_2                                                                                                                                                                                                                                                                                                                                                                                   | 11.9 | 8.8  | 3.1  | 5.9  |
| 393 AT3G62870.1   60S ribosomal protein L7A (RPL7aB), 60S RIBOSOMAL PROTEIN L7A - <i>Oryza sativa</i> , SWISSPROT:RL7A_ORYSA   chr3:23253640-23255328 REVERSE   Aliases: F26K9.300                                                                                                                                                                                                                                                                                                | 11.9 | 9.9  | 2.0  | 12.9 |
| 6161 AT5G20290.1   40S ribosomal protein S8 (RPS8A), ribosomal protein S8 - <i>Zea mays</i> , PIR:T04088   chr5:6851483-6853065 REVERSE   Aliases: F5O24.180, F5O24_180                                                                                                                                                                                                                                                                                                           | 11.9 | 10.9 | 1.0  | 3.9  |



|                                                                                                                                                                                                                                                                                                                                                                                                                                                                                                                                                                                                                                                                                                  |      |      |      |      |
|--------------------------------------------------------------------------------------------------------------------------------------------------------------------------------------------------------------------------------------------------------------------------------------------------------------------------------------------------------------------------------------------------------------------------------------------------------------------------------------------------------------------------------------------------------------------------------------------------------------------------------------------------------------------------------------------------|------|------|------|------|
| 725 AT3G13470.1   chaperonin, putative, similar SWISS-PROT:P21240- RuBisCO subunit binding-protein beta subunit, chloroplast precursor (60 kDa chaperonin beta subunit, CPN-60 beta) (Arabidopsis thaliana); contains Pfam:PF00118 domain, TCP-1/cpn60 chaperonin family   chr3:4389692-4392762 FORWARD   Aliases: MRP15.11                                                                                                                                                                                                                                                                                                                                                                      | 11.9 | 6.3  | 5.6  | 10.6 |
| 2506 AT5G37780.1   Symbol: CAM1   calmodulin-1/4 (CAM1), identical to calmodulin 4 (Arabidopsis thaliana) GI:16223, SP:P25854 Calmodulin-1/4 {Arabidopsis thaliana}   chr5:15021763-15023435 REVERSE   Aliases: ACAM 1, CALMODULIN 1, CAM1, K22F20.20, K22F20_20, TCH1                                                                                                                                                                                                                                                                                                                                                                                                                           | 11.9 | 9.5  | 2.4  | 6.7  |
| 2913 AT1G27530.1   expressed protein, Similar to gb:AF151884 CGI-126 protein from Homo sapiens. EST gb:Z18048 comes from this gene   chr1:9562586-9563926 REVERSE   Aliases: T17H3.3, T17H3_3                                                                                                                                                                                                                                                                                                                                                                                                                                                                                                    | 11.9 | 10.3 | 1.5  | 6.2  |
| 8204 AT1G43170.3   Symbol: ARP1   similar to 60S ribosomal protein L3 (RPL3B) [Arabidopsis thaliana] (TAIR:At1g61580.1); similar to ribosomal protein L3 [Triticum aestivum] (GB:AAQ62076.1); similar to ribosomal protein L3 [Triticum aestivum] (GB:AAQ62074.1); similar to ribosomal protein L3 [Lycopersicon esculentum] (GB:AAR17783.1); similar to ribosomal protein L3A [Nicotiana tabacum] (GB:AAQ96335.1); similar to ribosomal protein L3 [Triticum aestivum] (GB:AAQ21399.1); contains InterPro domain Ribosomal protein L3 (InterPro:IPR000597)   chr1:16269213-16271310 FORWARD   Aliases: ARABIDOPSIS RIBOSOMAL PROTEIN 1, EMB2207, EMBRYO DEFECTIVE 2207, F1I21.1, F1I21_1, RPL3A | 11.9 | 11.2 | 0.7  | 3.0  |
| 8173 AT4G13430.1   aconitase family protein / aconitate hydratase family protein, contains Pfam profile PF00330: Aconitase family (aconitate hydratase   chr4:7803929-7807865 REVERSE   Aliases: T9E8.170, T9E8_170                                                                                                                                                                                                                                                                                                                                                                                                                                                                              | 11.9 | 10.7 | 1.2  | 3.0  |
| 555 AT5G64130.2   expressed protein   chr5:25681625-25683425 REVERSE   Aliases: MHJ24.11, MHJ24_11                                                                                                                                                                                                                                                                                                                                                                                                                                                                                                                                                                                               | 11.9 | 10.4 | 1.5  | 11.6 |
| 146 AT2G43360.1   Symbol: BIO2   biotin synthase (BioB) (BIO2), identical to SP:P54967 Pfam profile PF04055: radical SAM domain protein   chr2:18017828-18020315 REVERSE   Aliases: BIOB, BIOTIN AUXOTROPH 2, BIOTIN AUXOTROPH B, BIOTIN SYNTHASE, T1O24.10                                                                                                                                                                                                                                                                                                                                                                                                                                      | 11.9 | 5.5  | 6.4  | 18.3 |
| 11889 AT3G03100.2   similar to NADH:ubiquinone oxidoreductase B17.2-like subunit [Chlamydomonas reinhardtii] (GB:AAQ64638.1); contains InterPro domain NADH:ubiquinone oxidoreductase 17.2 kD subunit (InterPro:IPR007763)   chr3:705388-707657 REVERSE   Aliases: T17B22.21, T17B22_21                                                                                                                                                                                                                                                                                                                                                                                                          | 11.9 | 11.4 | 0.5  | 1.8  |
| 3179 AT3G52730.1   ubiquinol-cytochrome C reductase UQCRX/QCR9-like family protein, contains Pfam profile: PF05365 ubiquinol-cytochrome C reductase, UQCRX/QCR9 like   chr3:19553909-19555242 REVERSE   Aliases: F3C22.130                                                                                                                                                                                                                                                                                                                                                                                                                                                                       | 11.9 | 10.8 | 1.0  | 5.9  |
| 9290 AT1G79550.2   Symbol: PGK   phosphoglycerate kinase, putative, similar to SP:P41758 Phosphoglycerate kinase, chloroplast precursor (EC 2.7.2.3) {Chlamydomonas reinhardtii}; contains Pfam profile PF00162: phosphoglycerate kinase   chr1:29928916-29931431 REVERSE   Aliases: PHOSPHOGLYCERATE KINASE, T8K14.3, T8K14_3                                                                                                                                                                                                                                                                                                                                                                   | 11.9 | 10.7 | 1.2  | 2.6  |
| 1425 AT4G16720.1   60S ribosomal protein L15 (RPL15A)   chr4:9399987-9401404 REVERSE   Aliases: DL4385C, FCAALL.416                                                                                                                                                                                                                                                                                                                                                                                                                                                                                                                                                                              | 11.9 | 10.6 | 1.3  | 8.4  |
| 1068 AT3G43810.1   Symbol: CAM7   calmodulin-7 (CAM7), almost identical to calmodulin GI:16227 from (Arabidopsis thaliana), SP:P59220 Calmodulin-7 {Arabidopsis thaliana}   chr3:15675358-15677445 REVERSE   Aliases: CALMODULIN 7, T28A8.100                                                                                                                                                                                                                                                                                                                                                                                                                                                    | 11.9 | 8.0  | 3.9  | 9.3  |
| 4821 AT1G67350.1   expressed protein, contains similarity to MHC class II antigen GI:9502037 from (Aotus nancymaae)                                                                                                                                                                                                                                                                                                                                                                                                                                                                                                                                                                              | 11.8 | 11.2 | 0.6  | 4.7  |
| 8746 AT2G23120.1   expressed protein   chr2:9849123-9849714 FORWARD   Aliases: F21P24.18, F21P24_18                                                                                                                                                                                                                                                                                                                                                                                                                                                                                                                                                                                              | 11.8 | 12.4 | -0.6 | -2.8 |
| 4888 AT1G11840.5   Symbol: ATGLX1                                                                                                                                                                                                                                                                                                                                                                                                                                                                                                                                                                                                                                                                | 11.8 | 10.3 | 1.6  | 4.6  |
| 1164 AT1G01100.2   60S acidic ribosomal protein P1 (RPP1A), similar to 60S ACIDIC RIBOSOMAL PROTEIN P1 GB:O23095 from (Arabidopsis thaliana)   chr1:50091-51182 REVERSE   Aliases: T25K16.9, T25K16_9                                                                                                                                                                                                                                                                                                                                                                                                                                                                                            | 11.8 | 9.6  | 2.2  | 9.1  |
| 3328 AT5G10980.1   histone H3, identical to HISTONE H3.2, MINOR, Medicago sativa, SWISSPROT:P11105, histone H3 variant H3.3 Lycopersicon esculentum GI:1435157; contains Pfam profile PF00125 Core histone H2A/H2B/H3/H4   chr5:3472429-3473442 REVERSE   Aliases: T30N20.250, T30N20_250                                                                                                                                                                                                                                                                                                                                                                                                        | 11.8 | 10.8 | 1.0  | 5.8  |
| 10219 AT4G24620.1   Symbol: PGI1   glucose-6-phosphate isomerase, putative, similar to glucose-6-phosphate isomerase (Spinacia oleracea) GI:3413511; contains Pfam profile PF00342: glucose-6-phosphate isomerase   chr4:12708767-12712835 REVERSE   Aliases: CHLOROPLASTIC PHOSPHOGLUCOSE ISOMERASE, F22K18.180, F22K18_180, PGI, PHOSPHO GLC ISOMERASE, PHOSPHOGLUCOSE ISOMERASE PRECURSOR                                                                                                                                                                                                                                                                                                     | 11.8 | 10.9 | 0.9  | 2.3  |
| 7219 AT3G02470.2   Symbol: SAMDC   similar to adenosylmethionine decarboxylase family protein [Arabidopsis thaliana] (TAIR:At5g15950.1); similar to S-adenosyl-L-methionine decarboxylase [Brassica juncea] (GB:AAF20160.1); contains InterPro domain S-adenosylmethionine decarboxylase (InterPro:IPR001985)   chr3:509428-511583 FORWARD   Aliases: ADOMETDC, F16B3.10, F16B3_10, S ADENOSYLMETHIONINE DECARBOXYLASE                                                                                                                                                                                                                                                                           | 11.8 | 12.4 | -0.6 | -3.4 |
| 871 AT4G26230.1   60S ribosomal protein L31 (RPL31B), ribosomal protein L31, Nicotiana glutinosa, U23784   chr4:13285837-13286800 FORWARD   Aliases: T25K17.40, T25K17_40                                                                                                                                                                                                                                                                                                                                                                                                                                                                                                                        | 11.8 | 10.1 | 1.7  | 10.0 |
| 6385 AT4G00860.1   Symbol: ATOZI1                                                                                                                                                                                                                                                                                                                                                                                                                                                                                                                                                                                                                                                                | 11.8 | 10.8 | 1.0  | 3.8  |

|                                                                                                                                                                                                                                                                                                                                                                                                                                                                                                                                                                                                                                                                                                                                                                                                                                   |      |      |     |      |
|-----------------------------------------------------------------------------------------------------------------------------------------------------------------------------------------------------------------------------------------------------------------------------------------------------------------------------------------------------------------------------------------------------------------------------------------------------------------------------------------------------------------------------------------------------------------------------------------------------------------------------------------------------------------------------------------------------------------------------------------------------------------------------------------------------------------------------------|------|------|-----|------|
| 6072 AT1G70310.1   Symbol: SPDS2   spermidine synthase 2 (SPDSYN2) / putrescine aminopropyltransferase 2, identical to SP:O48661 Spermidine synthase 2 (EC 2.5.1.16) (Putrescine aminopropyltransferase 2) (SPDSY 2) {Arabidopsis thaliana}   chr1:26488969-26491076 REVERSE   Aliases: F17O7.16, F17O7_16, SPERMIDINE SYNTHASE 2                                                                                                                                                                                                                                                                                                                                                                                                                                                                                                 | 11.8 | 10.6 | 1.1 | 4.0  |
| 3062 AT5G35530.1   40S ribosomal protein S3 (RPS3C)                                                                                                                                                                                                                                                                                                                                                                                                                                                                                                                                                                                                                                                                                                                                                                               | 11.8 | 10.6 | 1.1 | 6.1  |
| 12467 AT4G14880.2   Symbol: OASA1   cysteine synthase / O-acetylserine (thiol)-lyase / O-acetylserine sulfhydrylase (OAS1), nearly identical to SP:P47998 Cysteine synthase (EC 4.2.99.8) (O-acetylserine sulfhydrylase) (O-acetylserine (Thiol)-lyase) {Arabidopsis thaliana}; identical to cDNA O-acetylserine lyase (At.OAS.5-8) GI:6983573   chr4:8517955-8520406 REVERSE   Aliases: DL3480C, FCAALL.34                                                                                                                                                                                                                                                                                                                                                                                                                       | 11.8 | 11.1 | 0.7 | 1.7  |
| 1130 AT3G60770.1   40S ribosomal protein S13 (RPS13A), AtRPS13A mRNA for cytoplasmic ribosomal protein S13, Arabidopsis thaliana, AB031739   chr3:22471265-22472718 REVERSE   Aliases: T4C21.180                                                                                                                                                                                                                                                                                                                                                                                                                                                                                                                                                                                                                                  | 11.8 | 9.2  | 2.5 | 9.2  |
| 5846 AT2G03680.1   Symbol: SPR1   expressed protein, Alternative splicing exists based on EST evidence   chr2:1120797-1122004 FORWARD   Aliases: F19B11.13, F19B11_13, SKU6, SPIRAL1                                                                                                                                                                                                                                                                                                                                                                                                                                                                                                                                                                                                                                              | 11.8 | 10.7 | 1.1 | 4.1  |
| 4044 AT5G47210.1   nuclear RNA-binding protein, putative, similar to nuclear RNA binding protein GI:6492264 from (Arabidopsis thaliana)   chr5:19186249-19188446 REVERSE   Aliases: MQL5.6, MQL5_6                                                                                                                                                                                                                                                                                                                                                                                                                                                                                                                                                                                                                                | 11.7 | 10.6 | 1.2 | 5.2  |
| 376 AT3G17820.1   Symbol: ATGSKB6   glutamine synthetase (GS1), identical to glutamine synthetase, cytosolic isozyme (glutamate-- ammonia ligase, GS1) (Arabidopsis thaliana) SWISS-PROT:Q9LVI8   chr3:6097420-6099601 FORWARD   Aliases: GLN1;3, MEB5.4                                                                                                                                                                                                                                                                                                                                                                                                                                                                                                                                                                          | 11.7 | 7.6  | 4.1 | 13.1 |
| 3932 AT1G75280.1   isoflavone reductase, putative, identical to SP:P52577 Isoflavone reductase homolog P3 (EC 1.3.1.-) {Arabidopsis thaliana}; contains Pfam profile PF02716: isoflavone reductase. Involved in response to oxidative stress.   chr1:28255622-28257280 FORWARD   Aliases: F22H5.17, F22H5_17, P3                                                                                                                                                                                                                                                                                                                                                                                                                                                                                                                  | 11.7 | 8.2  | 3.6 | 5.3  |
| 5699 AT4G34700.1   complex 1 family protein / LVR family protein, contains Pfam PF05347: Complex 1 protein (LYR family)   chr4:16556850-16558851 FORWARD   Aliases: T4L20.280, T4L20_280                                                                                                                                                                                                                                                                                                                                                                                                                                                                                                                                                                                                                                          | 11.7 | 10.4 | 1.3 | 4.2  |
| 3724 ATCG00380.1   Symbol: RPS4   Chloroplast encoded ribosomal protein S4                                                                                                                                                                                                                                                                                                                                                                                                                                                                                                                                                                                                                                                                                                                                                        | 11.7 | 9.2  | 2.6 | 5.5  |
| 5221 AT3G12120.1   Symbol: FAD2   omega-6 fatty acid desaturase, endoplasmic reticulum (FAD2) / delta-12 desaturase, identical to omega-6 fatty acid desaturase, endoplasmic reticulum (FAD2) SP:P46313 (Arabidopsis thaliana (Mouse-ear cress)) (Plant Cell 6:147-158(1994))   chr3:3860291-3863036 REVERSE   Aliases: DELTA 12 DESATURASE, FATTY ACID DESATURASE 2, T21B14.6                                                                                                                                                                                                                                                                                                                                                                                                                                                    | 11.7 | 9.6  | 2.2 | 4.4  |
| 7497 AT5G20090.1   expressed protein, contains Pfam domain, PF03650: Uncharacterized protein family (UPF0041)   chr5:6787004-6788656 REVERSE   Aliases: F28I16.240, F28I16_240                                                                                                                                                                                                                                                                                                                                                                                                                                                                                                                                                                                                                                                    | 11.7 | 11.0 | 0.7 | 3.3  |
| 9123 AT1G64230.2   similar to ubiquitin-conjugating enzyme E2-17 kDa 9 (UBC9) [Arabidopsis thaliana] (TAIR:At4g27960.1); similar to ubiquitin-conjugating enzyme E2-17 kDa 9 (UBC9) [Arabidopsis thaliana] (TAIR:At4g27960.2); similar to ubiquitin-conjugating enzyme OsUBC5b [Oryza sativa (japonica cultivar-group)] (GB:XP_464900.1); similar to ubiquitin-conjugating enzyme E2 [Gossypium raimondii] (GB:AAL99225.1); similar to ubiquitin-conjugating enzyme 8 [Capsicum annuum] (GB:AAR83891.1); similar to ubiquitin carrier protein (GB:AAA34125.1); contains InterPro domain Ubiquitin-conjugating enzymes (InterPro:IPR000608)   chr1:23837231-23839199 FORWARD   Aliases: F22C12.2, F22C12_2                                                                                                                         | 11.7 | 11.1 | 0.6 | 2.7  |
| 2987 AT2G27720.1   60S acidic ribosomal protein P2 (RPP2A)   chr2:11825568-11826655 FORWARD   Aliases: F15K20.18, F15K20_18                                                                                                                                                                                                                                                                                                                                                                                                                                                                                                                                                                                                                                                                                                       | 11.7 | 10.4 | 1.3 | 6.1  |
| 2773 AT4G10480.1   nascent polypeptide associated complex alpha chain protein, putative / alpha-NAC, putative, similar to alpha-NAC, non-muscle form (Mus musculus) GI:1666690; contains Pfam profiles PF01849: NAC domain, PF00627: UBA/TS-N domain   chr4:6477872-6479160 REVERSE   Aliases: F7L13.60, F7L13_60                                                                                                                                                                                                                                                                                                                                                                                                                                                                                                                 | 11.7 | 9.9  | 1.8 | 6.4  |
| 3570 AT3G25530.2   similar to 6-phosphogluconate dehydrogenase NAD-binding domain-containing protein [Arabidopsis thaliana] (TAIR:At1g17650.1); similar to oxidoreductase-like [Oryza sativa (japonica cultivar-group)] (GB:BAD45192.1); contains InterPro domain 3-hydroxyisobutyrate dehydrogenase (InterPro:IPR002204); contains InterPro domain 6-phosphogluconate dehydrogenase, NAD binding domain (InterPro:IPR006115)   chr3:9273037-9274830 REVERSE   Aliases: MWL2.23                                                                                                                                                                                                                                                                                                                                                   | 11.7 | 10.2 | 1.5 | 5.6  |
| 3636 AT4G37870.2   similar to phosphoenolpyruvate carboxykinase (ATP), putative / PEP carboxykinase, putative / PEPCK, putative [Arabidopsis thaliana] (TAIR:At5g65690.1); similar to phosphoenolpyruvate carboxykinase [Flaveria pringlei] (GB:BAB43909.1); similar to phosphoenolpyruvate carboxykinase [Zoysia japonica] (GB:BAD88616.1); similar to phosphoenolpyruvate carboxykinase [Flaveria trinervia] (GB:BAB43907.1); similar to PEPCK [Cucumis sativus] (GB:AAM00814.1); similar to phosphoenolpyruvate carboxykinase [Lycopersicon esculentum] (GB:AAG01894.2); contains InterPro domain Phosphoenolpyruvate carboxykinase (ATP) (InterPro:IPR001272); contains InterPro domain Phosphoenolpyruvate carboxykinase, N-terminal (InterPro:IPR008210)   chr4:17802688-17806533 REVERSE   Aliases: T28I19.150, T28I19_150 | 11.7 | 8.6  | 3.1 | 5.5  |
| 2450 AT2G01250.1   60S ribosomal protein L7 (RPL7B)                                                                                                                                                                                                                                                                                                                                                                                                                                                                                                                                                                                                                                                                                                                                                                               | 11.7 | 10.2 | 1.5 | 6.8  |

|                                                                                                                                                                                                                                                                                                                                                                                                                                                                                                                                   |      |      |     |      |
|-----------------------------------------------------------------------------------------------------------------------------------------------------------------------------------------------------------------------------------------------------------------------------------------------------------------------------------------------------------------------------------------------------------------------------------------------------------------------------------------------------------------------------------|------|------|-----|------|
| 3657 AT4G33680.1   Symbol: AGD2   aminotransferase class I and II family protein, low similarity to Aromatic Aminotransferase from <i>Pyrococcus horikoshii</i> GP:14278621; contains Pfam profile PF00155 aminotransferase, classes I and II   chr4:16171697-16174681 REVERSE   Aliases: ABERRANT GROWTH AND DEATH 2, T16L1.170, T16L1_170                                                                                                                                                                                       | 11.7 | 8.5  | 3.2 | 5.5  |
| 19762 AT1G56700.1   pyrrolidone-carboxylate peptidase family protein, similar to Pyrrolidone-carboxylate peptidase (5-oxopropyl- peptidase) (Pyroglutamyl-peptidase I) (PGP-I) (Pyrase). (Swiss-Prot:O73944) ( <i>Pyrococcus furiosus</i> ); similar to Pyrrolidone-carboxylate peptidase (5-oxopropyl- peptidase) (Pyroglutamyl-peptidase I) (PGP-I). (Swiss-Prot:O07883) ( <i>Thermococcus litoralis</i> ); contains Pfam PF01470: pyrrolidone-carboxylate peptidase                                                            | 11.7 | 11.6 | 0.1 | 0.3  |
| 3479 AT1G02780.1   Symbol: EMB2386   60S ribosomal protein L19 (RPL19A), similar to ribosomal protein L19 GI:36127 from ( <i>Homo sapiens</i> )   chr1:607821-609435 REVERSE   Aliases: EMB2386, EMBRYO DEFECTIVE 2386, T14P4.34                                                                                                                                                                                                                                                                                                  | 11.7 | 9.1  | 2.5 | 5.7  |
| 13022 AT3G47810.3   calcineurin-like phosphoesterase family protein, contains Pfam profile: PF00149 calcineurin-like phosphoesterase                                                                                                                                                                                                                                                                                                                                                                                              | 11.7 | 11.1 | 0.5 | 1.6  |
| 11258 AT1G07890.5   Symbol: APX1   similar to L-ascorbate peroxidase 1b (APX1b) [ <i>Arabidopsis thaliana</i> ] (TAIR:At3g09640.1); similar to ascorbate peroxidase [ <i>Brassica juncea</i> ] (GB:AAN60794.1); contains InterPro domain Haem peroxidase (InterPro:IPR002016); contains InterPro domain Plant ascorbate peroxidase (InterPro:IPR002207)   chr1:2437327-2439649 FORWARD   Aliases: ASCORBATE PEROXIDASE, CS1, F24B9.2, F24B9_2                                                                                     | 11.7 | 10.6 | 1.0 | 2.0  |
| 5119 AT5G11520.1   Symbol: ASP3   aspartate aminotransferase, chloroplast / transaminase A (ASP3) (YLS4), identical to SP:P46644 Aspartate aminotransferase, chloroplast precursor (EC 2.6.1.1) (Transaminase A) { <i>Arabidopsis thaliana</i> }; identical to cDNA YLS4 mRNA for aspartate aminotransferase (ASP3), partial cds GI:13122285   chr5:3685090-3687765 REVERSE   Aliases: ASPARTATE AMINOTRANSFERASE 3, ASPARTATE AMINOTRANSFERASE, CHLOROPLAST PRECURSOR, F15N18.110, F15N18_110, YELLOW LEAF SPECIFIC GENE 4, YLS4 | 11.7 | 9.7  | 1.9 | 4.5  |
| 359 AT3G09500.1   60S ribosomal protein L35 (RPL35A), similar to 60S ribosomal protein L35 GB:AAC27830   chr3:2916986-2918036 FORWARD   Aliases: F11F8.7                                                                                                                                                                                                                                                                                                                                                                          | 11.6 | 9.3  | 2.3 | 13.4 |
| 3227 AT3G20390.1   endoribonuclease L-PSP family protein, contains Pfam domain PF01042: Endoribonuclease L-PSP   chr3:7109955-7111830 REVERSE   Aliases: MQC12.17                                                                                                                                                                                                                                                                                                                                                                 | 11.6 | 9.8  | 1.8 | 5.9  |
| 14748 AT5G43940.1   alcohol dehydrogenase class III / glutathione-dependent formaldehyde dehydrogenase / GSH-FDH (ADHIII), identical to gi:1143388   chr5:17701421-17704165 FORWARD   Aliases: MRH10.4, MRH10_4                                                                                                                                                                                                                                                                                                                   | 11.6 | 11.1 | 0.5 | 1.2  |
| 11032 AT2G27510.1   ferredoxin, putative, similar to non-photosynthetic ferredoxin from <i>Citrus sinensis</i> (GI:1360725), Ferredoxin, root R-B2 from <i>Raphanus sativus</i> (SP:P14937); contains Pfam profile PF00111 2Fe-2S iron-sulfur cluster binding domain   chr2:11765157-11766554 REVERSE   Aliases: F10A12.19, F10A12_19                                                                                                                                                                                             | 11.6 | 11.2 | 0.4 | 2.1  |
| 10289 AT5G20010.1   Symbol: RAN 1   Ras-related GTP-binding nuclear protein (RAN-1), identical to GTP-binding nuclear protein RAN-1 SP:P41916 from ( <i>Arabidopsis thaliana</i> )   chr5:6760286-6762096 FORWARD   Aliases: ATRAN1, F28I16.160, F28I16_160, RAN1                                                                                                                                                                                                                                                                 | 11.6 | 10.5 | 1.1 | 2.3  |
| 10290 AT5G20020.1   Symbol: RAN2   Ras-related GTP-binding nuclear protein (RAN-2), identical to GTP-binding nuclear protein RAN-2 SP:P41917 from ( <i>Arabidopsis thaliana</i> )   chr5:6762754-6764673 FORWARD   Aliases: F28I16.170, F28I16_170                                                                                                                                                                                                                                                                                | 11.6 | 10.5 | 1.1 | 2.3  |
| 10000 AT3G02090.2   Symbol: MPPBETA   mitochondrial processing peptidase beta subunit, putative, similar to mitochondrial processing peptidase beta subunit, mitochondrial precursor, Beta-MPP (Human) SWISS-PROT:O75439   chr3:365556-368918 FORWARD   Aliases: F1C9.12, F1C9_12, MPPBETA                                                                                                                                                                                                                                        | 11.6 | 10.4 | 1.2 | 2.4  |
| 11952 AT4G38800.1   phosphorylase family protein, contains weak similarity to Swiss-Prot:O51931 nucleosidase (Includes: 5'-methylthioadenosine nucleosidase (EC 3.2.2.16); S-adenosylhomocysteine nucleosidase ( <i>Buchnera aphidicola</i> ))                                                                                                                                                                                                                                                                                    | 11.6 | 11.1 | 0.5 | 1.8  |
| 2704 AT2G46390.1   expressed protein   chr2:19049374-19050133 REVERSE   Aliases: F11C10.8                                                                                                                                                                                                                                                                                                                                                                                                                                         | 11.6 | 10.4 | 1.2 | 6.5  |
| 6396 AT1G01800.1   short-chain dehydrogenase/reductase (SDR) family protein, similar to carbonyl reductase GI:1049108 from ( <i>Mus musculus</i> )   chr1:293342-295040 FORWARD   Aliases: T1N6.22, T1N6_22                                                                                                                                                                                                                                                                                                                       | 11.6 | 10.0 | 1.5 | 3.8  |
| 4540 AT4G24190.2   Symbol: SHD   shepherd protein (SHD) / clavata formation protein, putative, nearly identical to SHEPHERD ( <i>Arabidopsis thaliana</i> ) GI:19570872; contains Pfam profiles PF02518: ATPase, histidine kinase-, DNA gyrase B-, and HSP90-like domain protein, PF00183: Hsp90 protein   chr4:12551731-12555915 REVERSE   Aliases: SHEPHERD, T22A6.20, T22A6_20                                                                                                                                                 | 11.6 | 10.0 | 1.6 | 4.9  |
| 296 AT3G48930.1   Symbol: EMB1080   40S ribosomal protein S11 (RPS11A)   chr3:18151756-18153251 REVERSE   Aliases: EMB1080, EMBRYO DEFECTIVE 1080, T2I13.230                                                                                                                                                                                                                                                                                                                                                                      | 11.6 | 9.1  | 2.5 | 14.4 |
| 2676 AT5G15200.1   40S ribosomal protein S9 (RPS9B), 40S ribosomal protein S9, <i>Chlamydomonas</i> sp., EMBL:AU066528   chr5:4934886-4936384 REVERSE   Aliases: F8M21.90, F8M21_90                                                                                                                                                                                                                                                                                                                                               | 11.6 | 10.1 | 1.5 | 6.5  |
| 7479 AT5G60640.2   Symbol: ATPDIL1 4   thioredoxin family protein, similar to protein disulfide isomerase GI:5902592 from ( <i>Volvox carteri</i> f. <i>nagariensis</i> ), GI:2708314 from <i>Chlamydomonas reinhardtii</i> ; contains Pfam profile: PF00085 Thioredoxin   chr5:24388186-24391264 REVERSE   Aliases: ATPDIL1 4, MUP24.6, MUP24_6, PDI LIKE 1 4                                                                                                                                                                    | 11.6 | 11.1 | 0.4 | 3.3  |



|                                                                                                                                                                                                                                                                                                                                                                                                                  |      |      |      |      |
|------------------------------------------------------------------------------------------------------------------------------------------------------------------------------------------------------------------------------------------------------------------------------------------------------------------------------------------------------------------------------------------------------------------|------|------|------|------|
| 14807 AT3G15580.1   Symbol: APG8H   autophagy 8i (APG8i), identical to autophagy 8i (Arabidopsis thaliana) GI:19912167; contains Pfam profile PF02991: Microtubule associated protein 1A/1B, light chain 3; supporting cDNA gi:21636957:gb:AF492760.1:   chr3:5273902-5275102 REVERSE   Aliases: MQD17.3                                                                                                         | 11.6 | 11.8 | -0.2 | -1.2 |
| 10067 AT3G48170.1   Symbol: ALDH10A9   betaine-aldehyde dehydrogenase, putative, similar to betaine-aldehyde dehydrogenase, chloroplast precursor (BADH) (Arabidopsis thaliana) SWISS-PROT:Q9S795   chr3:17797129-17800967 REVERSE   Aliases: T24C20.50                                                                                                                                                          | 11.6 | 11.2 | 0.4  | 2.3  |
| 2307 AT4G33010.1   glycine dehydrogenase (decarboxylating), putative / glycine decarboxylase, putative / glycine cleavage system P-protein, putative, strong similarity to SP:P49361 Glycine dehydrogenase (decarboxylating) A, mitochondrial precursor (EC 1.4.4.2) {Flaveria pringlei}; contains Pfam profile PF02347: Glycine cleavage system P-protein   chr4:15926673-15931335 REVERSE   Aliases: F4I10.7   | 11.6 | 7.3  | 4.3  | 7.0  |
| 9025 AT5G50850.1   pyruvate dehydrogenase E1 component beta subunit, mitochondrial / PDHE1-B (PDH2), identical to SP:Q38799 Pyruvate dehydrogenase E1 component beta subunit, mitochondrial precursor (EC 1.2.4.1) (PDHE1-B) {Arabidopsis thaliana}                                                                                                                                                              | 11.6 | 10.9 | 0.7  | 2.7  |
| 6574 AT1G29850.2   double-stranded DNA-binding family protein, contains Pfam profile: PF01984 double-stranded DNA-binding domain   chr1:10447747-10449930 FORWARD   Aliases: F1N18.11, F1N18_11                                                                                                                                                                                                                  | 11.6 | 10.3 | 1.2  | 3.7  |
| 7349 NA                                                                                                                                                                                                                                                                                                                                                                                                          | 11.6 | 12.2 | -0.6 | -3.4 |
| 1249 AT5G02870.1   60S ribosomal protein L4/L1 (RPL4D), 60S roibosomal protein L4, Arabidopsis thaliana, EMBL:CAA79104   chr5:657784-659716 FORWARD   Aliases: F9G14.180, F9G14_180                                                                                                                                                                                                                              | 11.6 | 9.9  | 1.6  | 8.8  |
| 4088 AT1G48420.1   desulfhydrase family, similar to similar to D-cysteine desulfhydrase (EC 4.4.1.15). (Swiss-Prot:P59329) (Escherichia coli O6); contains TIGRFAM TIGR01275: pyridoxal phosphate-dependent enzymes, D-cysteine desulfhydrase family profile   chr1:17900267-17902472 REVERSE   Aliases: T1N15.3, T1N15_3                                                                                        | 11.6 | 10.1 | 1.4  | 5.2  |
| 18385 AT1G07140.1   Symbol: SIRANBP   Ran-binding protein 1a (RanBP1a), identical to Ran-binding protein (atranbp1a) GI:2058282 from (Arabidopsis thaliana)                                                                                                                                                                                                                                                      | 11.5 | 11.4 | 0.2  | 0.5  |
| 4233 AT1G48600.2   phosphoethanolamine N-methyltransferase 2, putative (NMT2), very similar to :PEM2_ARATH Putative phosphoethanolamine N-methyltransferase 2 (EC 2.1.1.103) (SP:Q944H0){Arabidopsis thaliana}; very similar to Halotolerance protein Hal3b (SP:P94063)(Arabidopsis thaliana); to similar to GB:AAF61950 from (Spinacia oleracea)   chr1:17969539-17973005 FORWARD   Aliases: T1N15.23, T1N15_23 | 11.5 | 12.3 | -0.7 | -5.1 |
| 1373 AT3G56340.1   40S ribosomal protein S26 (RPS26C), several 40S ribosomal protein S26   chr3:20903116-20904395 REVERSE   Aliases: T5P19.4                                                                                                                                                                                                                                                                     | 11.5 | 8.6  | 2.9  | 8.5  |
| 205 AT5G16060.1   expressed protein   chr5:5246125-5247434 FORWARD   Aliases: F1N13.200, F1N13_200                                                                                                                                                                                                                                                                                                               | 11.5 | 7.9  | 3.6  | 16.5 |
| 4620 AT2G20820.2   expressed protein, .   chr2:8971430-8972505 FORWARD   Aliases: F5H14.21, F5H14_21                                                                                                                                                                                                                                                                                                             | 11.5 | 10.2 | 1.3  | 4.8  |
| 606 AT3G53740.3   similar to 60S ribosomal protein L36 (RPL36A) [Arabidopsis thaliana] (TAIR:At2g37600.1); similar to putative 60S ribosomal protein L36 [Oryza sativa (japonica cultivar-group)] (GB:XP_475364.1); contains InterPro domain Ribosomal protein L36E (InterPro:IPR000509)   chr3:19924705-19925969 REVERSE   Aliases: F5K20.40                                                                    | 11.5 | 9.1  | 2.5  | 11.3 |
| 889 AT5G19510.1   elongation factor 1B alpha-subunit 2 (eEF1Balpha2), identical to elongation factor 1B alpha-subunit (Arabidopsis thaliana) GI:6686821   chr5:6581660-6583213 REVERSE   Aliases: T20D1.30, T20D1_30                                                                                                                                                                                             | 11.5 | 10.0 | 1.5  | 9.9  |
| 4759 AT4G16520.2   autophagy 8f (APG8f), identical to autophagy 8f (Arabidopsis thaliana) GI:19912161; contains Pfam profile PF02991: Microtubule associated protein 1A/1B, light chain 3   chr4:9306708-9308465 REVERSE   Aliases: DL4285C, FCAALL.383                                                                                                                                                          | 11.5 | 12.2 | -0.7 | -4.7 |
| 978 AT2G03870.2   small nuclear ribonucleoprotein, putative / snRNP, putative / Sm protein, putative, similar to U6 snRNA-associated Sm-like protein LSm7 (Homo sapiens) SWISS-PROT:Q9UK45                                                                                                                                                                                                                       | 11.5 | 10.0 | 1.5  | 9.6  |
| 66 AT3G54890.3   Symbol: LHCA1   chlorophyll A-B binding protein / LHCI type I (CAB), identical to chlorophyll A/B-binding protein (Arabidopsis thaliana) GI:16207; contains Pfam profile: PF00504 chlorophyll A-B binding protein   chr3:20350482-20351968 REVERSE   Aliases: F28P10.130, F28P10_130, LHCA1                                                                                                     | 11.5 | 4.7  | 6.9  | 24.0 |
| 1384 AT4G37930.1   Symbol: SHM1   glycine hydroxymethyltransferase / serine hydroxymethyltransferase / serine/threonine aldolase (SHM1), identical to serine hydroxymethyl transferase (Arabidopsis thaliana) GI:6899945   chr4:17831740-17834859 REVERSE   Aliases: F20D10.50, F20D10_50, SERINE HYDROXYMETHYLTRANSFERASE 1, SERINE TRANSHYDROXYMETHYLASE, SERINE TRANSHYDROXYMETHYLTRANSFERASE, STM            | 11.5 | 8.3  | 3.2  | 8.5  |
| 2419 AT1G41880.1   60S ribosomal protein L35a (RPL35aB), identical to GB:CAB81600 from (Arabidopsis thaliana)   chr1:15653564-15654932 REVERSE   Aliases: F5A13.4, F5A13_4                                                                                                                                                                                                                                       | 11.5 | 9.5  | 2.0  | 6.8  |
| 2420 AT3G55750.1   60S ribosomal protein L35a (RPL35aD), ribosomal protein L35a.e.c15, Saccharomyces cerevisiae, PIR:S44069                                                                                                                                                                                                                                                                                      | 11.5 | 9.5  | 2.0  | 6.8  |



|                                                                                                                                                                                                                                                                                                                                                                                                                                                                                                                                     |      |      |     |      |
|-------------------------------------------------------------------------------------------------------------------------------------------------------------------------------------------------------------------------------------------------------------------------------------------------------------------------------------------------------------------------------------------------------------------------------------------------------------------------------------------------------------------------------------|------|------|-----|------|
| 222 AT5G49630.1   Symbol: AAP6   amino acid permease 6 (AAP6), identical to amino acid permease 6 (AAP6) (Arabidopsis thaliana) GI:1769887   chr5:20159696-20163712 REVERSE   Aliases: AMINO ACID PERMEASE 6, MNI5.1, MNI5_1                                                                                                                                                                                                                                                                                                        | 11.5 | 3.8  | 7.8 | 15.9 |
| 9806 AT1G54100.2   Symbol: ALDH7B4   aldehyde dehydrogenase, putative / antiquitin, putative, strong similarity to SP:Q41247 Aldehyde dehydrogenase family 7 member A1 (EC 1.2.1.3) (Antiquitin 1) (Brassica turgor-responsive/drought-induced gene 26 protein) (Btg-26) {Brassica napus}; similar to turgor-responsive protein 26G (aldehyde dehydrogenase family 7 member A1) (Pisum sativum) SWISS-PROT:P25795   chr1:20198932-20202640 REVERSE   Aliases: F15I1.19, F15I1_19                                                    | 11.5 | 11.0 | 0.5 | 2.4  |
| 13144 NA                                                                                                                                                                                                                                                                                                                                                                                                                                                                                                                            | 11.5 | 10.8 | 0.7 | 1.6  |
| 2501 AT1G78040.1   pollen Ole e 1 allergen and extensin family protein, contains Pfam domain, PF01190: Pollen proteins Ole e I family   chr1:29350732-29352001 FORWARD   Aliases: F28K19.26, F28K19_26                                                                                                                                                                                                                                                                                                                              | 11.5 | 10.0 | 1.5 | 6.7  |
| 8770 ATCG00020.1   Symbol: PSBA   Encodes chlorophyll binding protein D1, a part of the photosystem II reaction center core   chrC:383-1444 REVERSE   Aliases: PSBA                                                                                                                                                                                                                                                                                                                                                                 | 11.5 | 9.4  | 2.1 | 2.8  |
| 1376 AT5G56670.1   40S ribosomal protein S30 (RPS30C)   chr5:22952639-22953207 REVERSE   Aliases: MIK19.12                                                                                                                                                                                                                                                                                                                                                                                                                          | 11.5 | 9.4  | 2.1 | 8.5  |
| 11550 AT5G48810.1   Symbol: ATB5 B                                                                                                                                                                                                                                                                                                                                                                                                                                                                                                  | 11.5 | 11.1 | 0.4 | 1.9  |
| 3628 AT4G19410.1   pectinacylesterase, putative, similar to pectinacylesterase precursor GI:1431629 from (Vigna radiata)   chr4:10582032-10585769 REVERSE   Aliases: T5K18.190, T5K18_190                                                                                                                                                                                                                                                                                                                                           | 11.5 | 9.7  | 1.8 | 5.5  |
| 452 AT5G23740.1   Symbol: RPS11 BETA   40S ribosomal protein S11 (RPS11C)                                                                                                                                                                                                                                                                                                                                                                                                                                                           | 11.5 | 8.8  | 2.7 | 12.4 |
| 9638 AT3G48000.1   Symbol: ALDH2B4   aldehyde dehydrogenase (ALDH2), identical to aldehyde dehydrogenase (Arabidopsis thaliana) GI:8574427; similar to mitochondrial aldehyde dehydrogenase (Arabidopsis thaliana) gi:19850249:gb:AAL99612; identical to cDNA aldehyde dehydrogenase AtALDH2a GI:20530140   chr3:17727852-17730999 REVERSE   Aliases: ALDEHYDE DEHYDROGENASE 2, ALDH2, T17F15.130                                                                                                                                   | 11.5 | 10.7 | 0.8 | 2.5  |
| 1347 AT3G07110.2   similar to 60S ribosomal protein L13A (RPL13aD) [Arabidopsis thaliana] (TAIR:At5g48760.1); similar to ribosomal protein L13a [Lupinus luteus] (GB:CAA11283.1); contains InterPro domain Ribosomal protein L13, bacterial and organelle form (InterPro:IPR005823); contains InterPro domain Ribosomal protein L13, archea and eukaryotic form (InterPro:IPR005755); contains InterPro domain Ribosomal protein L13 (InterPro:IPR005822)   chr3:2252025-2253534 FORWARD   Aliases: T1B9.24, T1B9_24                | 11.5 | 9.2  | 2.3 | 8.6  |
| 788 AT1G77710.1   expressed protein, similar to hypothetical protein GB:P34661 (Caenorhabditis elegans)   chr1:29211577-29212943 FORWARD   Aliases: T32E8.4, T32E8_4                                                                                                                                                                                                                                                                                                                                                                | 11.5 | 8.8  | 2.7 | 10.3 |
| 26 AT5G56600.1   Symbol: PRF3   profilin 5 (PRO5) (PRF3), identical to SP:Q9FE63 Profilin 5 {Arabidopsis thaliana}   chr5:22926914-22928047 REVERSE   Aliases: MIK19.4, MIK19_4, PFN3, PROFILIN, PROFILIN 3                                                                                                                                                                                                                                                                                                                         | 11.5 | 4.1  | 7.4 | 29.8 |
| 15784 AT3G22200.1   Symbol: POP2   4-aminobutyrate aminotransferase / gamma-amino-N-butyrate transaminase / GABA transaminase / beta-alanine--oxoglutarate aminotransferase, identical to gamma-aminobutyrate transaminase subunit precursor (Arabidopsis thaliana) (EC 2.6.1.19) GI:14030435; contains Pfam profile PF00202: aminotransferase, class III; identical to cDNA gamma-aminobutyrate transaminase subunit precursor, nuclear gene for mitochondrial product GI:14030434                                                 | 11.5 | 11.0 | 0.4 | 1.0  |
| 1125 AT3G47836.1   expressed protein   chr3:17661246-17662750 REVERSE   Aliases: None                                                                                                                                                                                                                                                                                                                                                                                                                                               | 11.5 | 9.5  | 1.9 | 9.2  |
| 76 AT3G02790.1   zinc finger (C2H2 type) family protein, contains Pfam profile: PF00096 zinc finger, C2H2 type   chr3:604852-605428 FORWARD   Aliases: F13E7.27, F13E7_27                                                                                                                                                                                                                                                                                                                                                           | 11.5 | 7.0  | 4.4 | 22.4 |
| 2862 AT4G00100.1   Symbol: ATRPS13A   40S ribosomal protein S13 (RPS13A), similar to ribosomal protein S13; PF00312 (View Sanger Pfam): ribosomal protein S15; identical to cDNA AtRPS13A mRNA for cytoplasmic ribosomal protein S13 GI:6521011   chr4:37096-38312 FORWARD   Aliases: F6N15.7, F6N15_7, PFL2, POINTED FIRST LEAF 2, RIBOSOMAL PROTEIN S13, RIBOSOMAL PROTEIN S13A, RPS13                                                                                                                                            | 11.5 | 9.0  | 2.4 | 6.3  |
| 1294 AT2G19730.2   similar to 60S ribosomal protein L28 (RPL28C) [Arabidopsis thaliana] (TAIR:At4g29410.1); similar to putative 60S ribosomal L28 protein [Oryza sativa (japonica cultivar-group)] (GB:AAV67824.1); contains InterPro domain Ribosomal L28e protein (InterPro:IPR002672)   chr2:8518589-8520303 FORWARD   Aliases: F6F22.24, F6F22_24                                                                                                                                                                               | 11.5 | 9.5  | 1.9 | 8.7  |
| 4117 AT3G01910.2   Symbol: SOX   similar to nitrate reductase 1 (NR1) [Arabidopsis thaliana] (TAIR:At1g77760.1); similar to B Chain B, Sulfite Oxidase From Chicken Liver (GB:1SOX); contains InterPro domain Eukaryotic molybdopterin oxidoreductase (InterPro:IPR008335); contains InterPro domain Mo-co oxidoreductase dimerisation domain (InterPro:IPR005066); contains InterPro domain Oxidoreductase, molybdopterin binding (InterPro:IPR000572)   chr3:314703-316719 REVERSE   Aliases: F28J7.38, F28J7_38, SULFITE OXIDASE | 11.4 | 10.5 | 1.0 | 5.2  |
| 151 AT4G15910.1   Symbol: ATDI21                                                                                                                                                                                                                                                                                                                                                                                                                                                                                                    | 11.4 | 7.6  | 3.8 | 18.0 |

|       |             |                                                                                                                                                                                                                                                                                                                                                                                                                                                                                                         |      |      |      |      |
|-------|-------------|---------------------------------------------------------------------------------------------------------------------------------------------------------------------------------------------------------------------------------------------------------------------------------------------------------------------------------------------------------------------------------------------------------------------------------------------------------------------------------------------------------|------|------|------|------|
| 12883 | AT4G14710.2 | similar to iron-deficiency-responsive protein, putative [Arabidopsis thaliana] (TAIR:At4g14716.1); similar to submergence induced protein 2A [Oryza sativa] (GB:AAC19375.1); contains InterPro domain Acireductone dioxygenase, ARD (InterPro:IPR004313); contains InterPro domain Cupin domain (InterPro:IPR007113)   chr4:8424675-8426550 REVERSE   Aliases: DL3395C, FCAALL.141                                                                                                                      | 11.4 | 10.5 | 1.0  | 1.6  |
| 12884 | AT4G14716.1 | iron-deficiency-responsive protein, putative, strong similarity to iron-deficiency induced gene (Hordeum vulgare) GI:14522834; contains Pfam profile PF03079: ARD/ARD' family   chr4:8430202-8431940 REVERSE   Aliases: None                                                                                                                                                                                                                                                                            | 11.4 | 10.5 | 1.0  | 1.6  |
| 3165  | AT1G26550.1 | peptidyl-prolyl cis-trans isomerase PPIC-type family protein, similar to SP:Q9Y237 Peptidyl-prolyl cis-trans isomerase NIMA-interacting 4 (EC 5.2.1.8) (Rotamase Pin4) (PPIase Pin4) (Parvulin 14) {Homo sapiens}; contains Pfam profile PF00639: PPIC-type PPIASE domain   chr1:9171119-9172926 FORWARD   Aliases: T1K7.8, T1K7_8                                                                                                                                                                      | 11.4 | 10.6 | 0.8  | 5.9  |
| 5596  | AT3G13930.1 | dihydrolipoamide S-acetyltransferase, putative, similar to dihydrolipoamide S-acetyltransferase (Zea mays) GI:5669871; contains Pfam profiles PF00198: 2-oxo acid dehydrogenases acyltransferase (catalytic domain), PF00364: Biotin-requiring enzyme, PF02817: e3 binding domain   chr3:4595883-4600476 FORWARD   Aliases: MDC16.18                                                                                                                                                                    | 11.4 | 10.8 | 0.7  | 4.2  |
| 2741  | AT4G31700.1 | Symbol: RPS6   40S ribosomal protein S6 (RPS6A), ribosomal protein S6, Arabidopsis thaliana, PID:g2662469   chr4:15346083-15347731 REVERSE   Aliases: F28M20.110, F28M20_110, RIBOSOMAL PROTEIN S6                                                                                                                                                                                                                                                                                                      | 11.4 | 9.5  | 1.9  | 6.4  |
| 9400  | AT2G31390.1 | pfkB-type carbohydrate kinase family protein, contains Pfam profile: PF00294 pfkB family carbohydrate kinase   chr2:13390140-13393286 REVERSE   Aliases: T28P16.12, T28P16_12                                                                                                                                                                                                                                                                                                                           | 11.4 | 10.9 | 0.5  | 2.6  |
| 17773 | AT3G17390.1 | Symbol: MTO3   S-adenosylmethionine synthetase, putative, similar to S-adenosylmethionine synthetase 2 (Methionine adenosyltransferase 2, AdoMet synthetase 2) (Catharanthus roseus) SWISS-PROT:Q96552   chr3:5952193-5954088 REVERSE   Aliases: MGD8.26, S ADENOSYLMETHIONINE SYNTHETASE, SAMS3                                                                                                                                                                                                        | 11.4 | 11.3 | 0.1  | 0.6  |
| 1601  | AT4G33070.1 | pyruvate decarboxylase, putative, strong similarity to SP:P51846 Pyruvate decarboxylase isozyme 2 (EC 4.1.1.1) (PDC) {Nicotiana tabacum}; contains InterPro entry IPR000399: Pyruvate decarboxylase   chr4:15952292-15954774 REVERSE   Aliases: F4110.4                                                                                                                                                                                                                                                 | 11.4 | 7.1  | 4.4  | 8.0  |
| 11558 | AT1G60680.1 | aldo/keto reductase family protein, contains Pfam profile PF00248: oxidoreductase, aldo/keto reductase family   chr1:22350775-22352913 REVERSE   Aliases: F8A5.20, F8A5_20                                                                                                                                                                                                                                                                                                                              | 11.4 | 11.1 | 0.3  | 1.9  |
| 9983  | ATCG00820.1 | Symbol: RPS19   Encodes a 6.8-kDa protein of the small ribosomal subunit.   chrC:84005-84283 REVERSE   Aliases: RPS19                                                                                                                                                                                                                                                                                                                                                                                   | 11.4 | 9.7  | 1.7  | 2.4  |
| 3344  | AT1G08360.1 | 60S ribosomal protein L10A (RPL10aA), similar to 60S ribosomal protein L10A GB:AAC73045 GI:3860277 from (Arabidopsis thaliana)   chr1:2636027-2637912 FORWARD   Aliases: T27G7.6, T27G7_6                                                                                                                                                                                                                                                                                                               | 11.4 | 9.6  | 1.8  | 5.8  |
| 3731  | AT3G22110.1 | Symbol: PAC1   20S proteasome alpha subunit C (PAC1) (PRC9), identical to GB:AAC32057 from (Arabidopsis thaliana) (Genetics (1998) 149 (2), 677-692); identical to cDNA proteasome subunit prc9 GI:2511583   chr3:7792645-7794161 REVERSE   Aliases: 20S PROTEASOME SUBUNIT PAC1, MKA23.2                                                                                                                                                                                                               | 11.4 | 9.5  | 1.9  | 5.5  |
| 1748  | AT3G57610.1 | adenylosuccinate synthetase (ADSS), identical to adenylosuccinate synthetase, chloroplast precursor (EC 6.3.4.4) (IMP-- aspartate ligase) (AdSS) (AMPSase) (Swiss-Prot:Q96529) (Arabidopsis thaliana)   chr3:21345261-21347635 REVERSE   Aliases: F15B8.200, F15B8_200                                                                                                                                                                                                                                  | 11.4 | 8.9  | 2.5  | 7.8  |
| 7750  | AT3G12050.2 | Aha1 domain-containing protein, contains Pfam PF05146: Aha1 domain; similar to Protein C14orf3 (HSPC322) (Swiss-Prot:O95433) (Homo sapiens)   chr3:3839108-3841472 FORWARD   Aliases: MEC18.18                                                                                                                                                                                                                                                                                                          | 11.4 | 10.8 | 0.6  | 3.2  |
| 20084 | AT3G61440.1 | Symbol: ATCYSC1   encodes a cysteine synthase isomer. The isomer is however less effective in cysteine biosynthesis. It is involved in beta-cyanoalanine biosynthesis, a intermediate of cyanide detoxification pathway.   chr3:22746722-22748953 FORWARD   Aliases: ARATH;BSAS3;1, CYSTEINE SYNTHASE, F2A19.40                                                                                                                                                                                         | 11.4 | 11.3 | 0.1  | 0.2  |
| 16533 | AT2G43970.2 | La domain-containing protein, contains Pfam profile PF05383: La domain   chr2:18212311-18215294 REVERSE   Aliases: F6E13.10                                                                                                                                                                                                                                                                                                                                                                             | 11.4 | 11.2 | 0.2  | 0.9  |
| 3276  | AT4G34670.1 | 40S ribosomal protein S3A (RPS3aB)   chr4:16548651-16550453 FORWARD   Aliases: T4L20.250, T4L20_250                                                                                                                                                                                                                                                                                                                                                                                                     | 11.4 | 9.9  | 1.5  | 5.8  |
| 7291  | AT1G26630.1 | eukaryotic translation initiation factor 5A, putative / eIF-5A, putative, strong similarity to SP:Q9AXQ6 Eukaryotic translation initiation factor 5A-1 (eIF-5A 1) {Lycopersicon esculentum}   chr1:9205823-9207402 FORWARD   Aliases: T24P13.1, T24P13_1                                                                                                                                                                                                                                                | 11.4 | 9.7  | 1.7  | 3.4  |
| 19671 | AT3G02780.1 | Symbol: IPP2   isopentenyl-diphosphate delta-isomerase II / isopentenyl diphosphate:dimethylallyl diphosphate isomerase II (IPP2), identical to isopentenyl diphosphate:dimethylallyl diphosphate isomerase (IPP2) GB:U49259 (Arabidopsis thaliana)   chr3:602440-604682 REVERSE   Aliases: F13E7.28, F13E7_28, IDI2, IPIAT1, ISOPENTENYL DIPHOSPHATE ISOMERASE 2, ISOPENTENYL PYROPHOSPHATE:DIMETHYLLALLYL PYROPHOSPHATE ISOMERASE, ISOPENTENYL PYROPHOSPHATE:DIMETHYLLALLYL PYROPHOSPHATE ISOMERASE 2 | 11.4 | 11.4 | -0.1 | -0.3 |
| 7309  | AT4G37830.1 | cytochrome c oxidase-related, contains weak similarity to cytochrome c oxidase polypeptide VIa-liver, mitochondrial precursor (EC 1.9.3.1) (Swiss-Prot:P10818) (Rattus norvegicus)   chr4:17787473-17788821 REVERSE   Aliases: None                                                                                                                                                                                                                                                                     | 11.4 | 10.7 | 0.7  | 3.4  |

|                                                                                                                                                                                                                                                                                                                                                                                                                                                                                             |      |      |      |       |
|---------------------------------------------------------------------------------------------------------------------------------------------------------------------------------------------------------------------------------------------------------------------------------------------------------------------------------------------------------------------------------------------------------------------------------------------------------------------------------------------|------|------|------|-------|
| 11262 AT2G02760.1   Symbol: ATUBC2                                                                                                                                                                                                                                                                                                                                                                                                                                                          | 11.4 | 11.0 | 0.4  | 2.0   |
| 3580 AT1G75330.1   Symbol: OTC   ornithine carbamoyltransferase, chloroplast / ornithine transcarbamylase / OTCase (OTC), identical to SP:O50039 Ornithine carbamoyltransferase, chloroplast precursor (EC 2.1.3.3) (OTCase) (Ornithine transcarbamylase) {Arabidopsis thaliana}   chr1:28269920-28272068 REVERSE   Aliases: F1B16.13, F1B16_13, ORNITHINE CARBAMOYLTRANSFERASE                                                                                                             | 11.3 | 9.1  | 2.2  | 5.6   |
| 3976 AT1G07770.2   Symbol: RPS15A                                                                                                                                                                                                                                                                                                                                                                                                                                                           | 11.3 | 10.5 | 0.9  | 5.3   |
| 10529 ATCG00340.1   Symbol: PSAB   Encodes the D1 subunit of photosystem I and II reaction centers.   chrC:37375-39579 REVERSE   Aliases: PSAB                                                                                                                                                                                                                                                                                                                                              | 11.3 | 10.5 | 0.8  | 2.2   |
| 2411 AT2G21170.1   Symbol: TIM   triosephosphate isomerase, chloroplast, putative, similar to Triosephosphate isomerase, chloroplast precursor: SP:P48496 from Spinacia oleracea, SP:P46225 from Secale cereale   chr2:9077835-9080304 REVERSE   Aliases: F26H11.7, F26H11_7, TRIOSEPHOSPHATE ISOMERASE                                                                                                                                                                                     | 11.3 | 9.3  | 2.0  | 6.8   |
| 1108 AT2G36060.2   ubiquitin-conjugating enzyme family protein, similar to DNA-binding protein CROC-1B (Homo sapiens) GI:1066082; contains Pfam profile PF00179: Ubiquitin-conjugating enzyme   chr2:15149876-15151261 REVERSE   Aliases: F11F19.3, F11F19_3                                                                                                                                                                                                                                | 11.3 | 10.2 | 1.1  | 9.2   |
| 5177 AT1G35160.1   Symbol: GRF4   14-3-3 protein GF14 phi (GRF4), identical to GF14 protein phi chain GI:1493805, SP:P46077 from (Arabidopsis thaliana)   chr1:12867159-12868771 FORWARD   Aliases: GF14 PHI, GF14 PROTEIN PHI CHAIN, GRF4, T32G9.30, T32G9_30                                                                                                                                                                                                                              | 11.3 | 6.7  | 4.6  | 4.5   |
| 5178 AT4G09000.1   Symbol: GRF1   14-3-3-like protein GF14 chi / general regulatory factor 1 (GRF1), identical to 14-3-3 protein GF14 chi chain GI:1702986, SP:P42643 from (Arabidopsis thaliana)                                                                                                                                                                                                                                                                                           | 11.3 | 6.7  | 4.6  | 4.5   |
| 1895 AT5G20720.2   Symbol: CPN20   20 kDa chaperonin, chloroplast (CPN21) (CHCPN10) (CPN20), identical to chloroplast 20 kDa chaperonin, chloroplast precursor (Protein Cpn21), chloroplast protein Cpn10, chloroplast chaperonin 10 (Ch-CPN10), SP:O65282 from (Arabidopsis thaliana); identical to cDNA chaperonin 20 GI:14587372   chr5:7014688-7016476 FORWARD   Aliases: ATCPN21, CHAPERONIN 10, CHAPERONIN 20, CHCPN10, CHLOROPLAST CHAPERONIN 10, CPN10, CPN21, T1M15.120, T1M15_120 | 11.3 | 9.3  | 2.1  | 7.6   |
| 3789 AT1G79040.1   photosystem II 10 kDa polypeptide, identical to photosystem II 10 kDa polypeptide, chloroplast (precursor) SP:P27202 from (Arabidopsis thaliana); contains Pfam profile: PF04725 photosystem II 10 kDa polypeptide PsbR   chr1:29740911-29741831 FORWARD   Aliases: YUP8H12R.34, YUP8H12R_34                                                                                                                                                                             | 11.3 | 9.9  | 1.5  | 5.4   |
| 5588 AT2G01140.1   fructose-bisphosphate aldolase, putative, similar to plastidic aldolase NPALDP1 from Nicotiana paniculata (GI:4827251); contains Pfam profile PF00274 Fructose-bisphosphate aldolase class-I   chr2:94810-96634 REVERSE   Aliases: F10A8.2, F10A8_2                                                                                                                                                                                                                      | 11.3 | 9.8  | 1.5  | 4.2   |
| 1095 AT1G04270.2   Symbol: RPS15   similar to 40S ribosomal protein S15 (RPS15D) [Arabidopsis thaliana] (TAIR:At5g09510.1); similar to ribosomal S15 protein [Retama raetam] (GB:AAL32040.1); contains InterPro domain Ribosomal protein S19/S15 (InterPro:IPR002222); contains InterPro domain Ribosomal protein S15, eukaryotic and archaeal form (InterPro:IPR005713)   chr1:1141603-1143050 REVERSE   Aliases: F19P19.29, F19P19_29, RIBOSOMAL PROTEIN S15                              | 11.3 | 9.6  | 1.8  | 9.3   |
| 16437 AT2G41430.4   Symbol: ERD15   dehydration-induced protein (ERD15), identical to dehydration-induced protein ERD15 GI:710626 from (Arabidopsis thaliana)   chr2:17276388-17277620 FORWARD   Aliases: CID1, DEHYDRATION INDUCED PROTEIN, EARLY RESPONSIVE TO DEHYDRATION 15, LIGHT STRESS REGULATED 1, LSR1, T26J13.2                                                                                                                                                                   | 11.3 | 11.5 | -0.2 | -0.9  |
| 2730 AT4G39200.1   40S ribosomal protein S25 (RPS25E), ribosomal protein S25, Lycopersicon esculentum, PIR2:S40089   chr4:18257330-18258670 FORWARD   Aliases: T22F8.100, T22F8_100                                                                                                                                                                                                                                                                                                         | 11.3 | 9.6  | 1.7  | 6.4   |
| 596 AT1G07610.1   Symbol: MT1C   metallothionein-like protein 1C (MT-1C), identical to Metallothionein-like protein 1C (MT-1C). (SP:Q38804) (Arabidopsis thaliana)   chr1:2341539-2342120 FORWARD   Aliases: F22G5.40                                                                                                                                                                                                                                                                       | 11.3 | 14.1 | -2.7 | -11.3 |
| 6193 AT3G09820.2   Symbol: ADK1   adenosine kinase 1 (ADK1) / adenosine 5'-phosphotransferase 1, identical to adenosine kinase 1 /adenosine 5'-phosphotransferase 1 SP:Q9SF85 from (Arabidopsis thaliana)   chr3:3012099-3014949 FORWARD   Aliases: ADENOSINE KINASE 1, F8A24.13                                                                                                                                                                                                            | 11.3 | 9.3  | 2.0  | 3.9   |
| 11183 AT5G19760.1   dicarboxylate/tricarboxylate carrier (DTC), identical to dicarboxylate/tricarboxylate carrier (Arabidopsis thaliana) GI:19913113                                                                                                                                                                                                                                                                                                                                        | 11.3 | 10.5 | 0.8  | 2.0   |
| 1183 AT4G00585.1   expressed protein   chr4:250955-252532 REVERSE   Aliases: None                                                                                                                                                                                                                                                                                                                                                                                                           | 11.3 | 9.2  | 2.1  | 9.0   |
| 4649 AT3G61110.1   Symbol: ARS27A                                                                                                                                                                                                                                                                                                                                                                                                                                                           | 11.3 | 9.3  | 2.0  | 4.8   |
| 149 AT5G54270.1   Symbol: LHCB3   chlorophyll A-B binding protein / LHCII type III (LHCB3), identical to Lhcb3 protein (Arabidopsis thaliana) GI:4741952; contains Pfam profile PF00504: Chlorophyll A-B binding protein   chr5:22055555-22056794 FORWARD   Aliases: LHCB3*1, LIGHT HARVESTING CHLOROPHYLL BINDING PROTEIN 3, MDK4.9, MDK4_9                                                                                                                                                | 11.3 | 4.5  | 6.8  | 18.0  |
| 3330 AT1G64190.1   6-phosphogluconate dehydrogenase family protein, contains Pfam profiles: PF00393 6-phosphogluconate dehydrogenase C-terminal domain, PF03446 NAD binding domain of 6-phosphogluconate   chr1:23828991-23830799 REVERSE   Aliases: F22C12.5, F22C12_5                                                                                                                                                                                                                     | 11.3 | 12.2 | -0.9 | -5.8  |



|                                                                                                                                                                                                                                                                                                                                                                                                                                                                                                                                                                                                                                                                                                                                                                                                                                                                                                                                                                                                                                                                                                                                                             |      |      |      |      |
|-------------------------------------------------------------------------------------------------------------------------------------------------------------------------------------------------------------------------------------------------------------------------------------------------------------------------------------------------------------------------------------------------------------------------------------------------------------------------------------------------------------------------------------------------------------------------------------------------------------------------------------------------------------------------------------------------------------------------------------------------------------------------------------------------------------------------------------------------------------------------------------------------------------------------------------------------------------------------------------------------------------------------------------------------------------------------------------------------------------------------------------------------------------|------|------|------|------|
| 1981 ATCG00800.1   Symbol: RPS3   encodes a chloroplast ribosomal protein S3, a constituent of the small subunit of the ribosomal complex   chrC:82826-83482 REVERSE   Aliases: RPS3                                                                                                                                                                                                                                                                                                                                                                                                                                                                                                                                                                                                                                                                                                                                                                                                                                                                                                                                                                        | 11.3 | 9.8  | 1.5  | 7.4  |
| 12905 AT1G56070.1   Symbol: LOS1   elongation factor 2, putative / EF-2, putative, similar to ELONGATION FACTOR 2 GB:O14460 from (Schizosaccharomyces pombe)   chr1:20971595-20975407 REVERSE   Aliases: AT1G56075, AT1G56075.1, T6H22.13, T6H22.24, T6H22_13                                                                                                                                                                                                                                                                                                                                                                                                                                                                                                                                                                                                                                                                                                                                                                                                                                                                                               | 11.3 | 10.8 | 0.5  | 1.6  |
| 5297 AT5G35590.1   Symbol: PAA1   20S proteasome alpha subunit A1 (PAA1) (PRC1), identical to proteasome subunit alpha type 6-1 SP:O81146 GI:12643647 from (Arabidopsis thaliana); identical to cDNA proteasome subunit prc1 GI:2511587   chr5:13782400-13785047 REVERSE   Aliases: 20S PROTEASOME SUBUNIT PAA1, K2K18.4, K2K18_4                                                                                                                                                                                                                                                                                                                                                                                                                                                                                                                                                                                                                                                                                                                                                                                                                           | 11.3 | 10.4 | 0.9  | 4.4  |
| 5296 AT2G05840.2   Symbol: PAA2   similar to 20S proteasome alpha subunit A1 (PAA1) (PRC1) [Arabidopsis thaliana] (TAIR:At5g35590.1); similar to proteasome IOTA subunit [Glycine max] (GB:AAC28135.1); contains InterPro domain Proteasome subunit, A-type (InterPro:IPR000426); contains InterPro domain Multispecific proteasome protease (InterPro:IPR001353)   chr2:2234089-2236287 FORWARD   Aliases: 20S PROTEASOME SUBUNIT PAA2, T6P5.4, T6P5_4                                                                                                                                                                                                                                                                                                                                                                                                                                                                                                                                                                                                                                                                                                     | 11.3 | 10.4 | 0.9  | 4.4  |
| 2683 AT2G32520.1   diene lactone hydrolase family protein, low similarity to diene lactone hydrolase (Pseudomonas resinovorans) GI:13094163; contains Pfam profile PF01738: Diene lactone hydrolase family   chr2:13812596-13814613 REVERSE   Aliases: T26B15.8, T26B15_8                                                                                                                                                                                                                                                                                                                                                                                                                                                                                                                                                                                                                                                                                                                                                                                                                                                                                   | 11.3 | 9.4  | 1.9  | 6.5  |
| 13662 AT2G21660.2   Symbol: ATGRP7                                                                                                                                                                                                                                                                                                                                                                                                                                                                                                                                                                                                                                                                                                                                                                                                                                                                                                                                                                                                                                                                                                                          | 11.3 | 10.4 | 0.9  | 1.4  |
| 3550 AT5G58590.1   Symbol: RANBP1                                                                                                                                                                                                                                                                                                                                                                                                                                                                                                                                                                                                                                                                                                                                                                                                                                                                                                                                                                                                                                                                                                                           | 11.3 | 8.9  | 2.4  | 5.6  |
| 8940 AT4G35630.1   Symbol: PSAT   phosphoserine aminotransferase, chloroplast (PSAT), identical to Phosphoserine aminotransferase, chloroplast precursor (PSAT) (SP:Q96255)(Arabidopsis thaliana); contains TIGRFAM TIGR01364: phosphoserine aminotransferase; contains Pfam PF00266: aminotransferase, class V   chr4:16904064-16905727 FORWARD   Aliases: PHOSPHOSERINE AMINOTRANSFERASE                                                                                                                                                                                                                                                                                                                                                                                                                                                                                                                                                                                                                                                                                                                                                                  | 11.3 | 10.1 | 1.2  | 2.7  |
| 4356 AT1G53240.1   malate dehydrogenase (NAD), mitochondrial, identical to mitochondrial NAD-dependent malate dehydrogenase GI:3929649 SP:Q9ZP06 from (Arabidopsis thaliana); contains InterPro entry IPR001236: Lactate/malate dehydrogenase   chr1:19858283-19860605 REVERSE   Aliases: F12M16.14, F12M16_14                                                                                                                                                                                                                                                                                                                                                                                                                                                                                                                                                                                                                                                                                                                                                                                                                                              | 11.3 | 9.0  | 2.3  | 5.0  |
| 6410 NA                                                                                                                                                                                                                                                                                                                                                                                                                                                                                                                                                                                                                                                                                                                                                                                                                                                                                                                                                                                                                                                                                                                                                     | 11.3 | 12.0 | -0.7 | -3.8 |
| 2153 AT5G56500.2   similar to chaperonin, putative [Arabidopsis thaliana] (TAIR:At1g26230.1); similar to RuBisCO subunit binding-protein beta subunit, chloroplast / 60 kDa chaperonin beta subunit / CPN-60 beta [Arabidopsis thaliana] (TAIR:At1g55490.2); similar to chaperonin, putative [Arabidopsis thaliana] (TAIR:At3g13470.1); similar to RuBisCO subunit binding-protein beta subunit, chloroplast / 60 kDa chaperonin beta subunit / CPN-60 beta [Arabidopsis thaliana] (TAIR:At1g55490.1); similar to putative RuBisCO subunit binding-protein beta subunit, chloroplast precursor [Oryza sativa (japonica cultivar-group)] (GB:XP_463795.1); similar to chaperonin [Secale cereale] (GB:CAA93139.1); similar to chaperonin 62.5K beta chain - rape (GB:PW0007); similar to putative chaperonin 60 beta precursor [Oryza sativa (japonica cultivar-group)] (GB:NP_910308.1); similar to chaperonin precursor [Pisum sativum] (GB:AAA66365.1); contains InterPro domain Chaperonin Cpn60 (InterPro:IPR001844); contains InterPro domain Chaperonin Cpn60/TCP-1 (InterPro:IPR002423)   chr5:22891017-22894622 FORWARD   Aliases: MCD7.27, MCD7_27 | 11.3 | 8.2  | 3.1  | 7.2  |
| 7086 AT5G56150.2   ubiquitin-conjugating enzyme, putative, strong similarity to ubiquitin-conjugating enzyme UBC2 (Mesembryanthemum crystallinum) GI:5762457, UBC4 (Pisum sativum) GI:456568; contains Pfam profile PF00179: Ubiquitin-conjugating enzyme   chr5:22746408-22748409 FORWARD   Aliases: MDA7.21, MDA7_21                                                                                                                                                                                                                                                                                                                                                                                                                                                                                                                                                                                                                                                                                                                                                                                                                                      | 11.3 | 10.6 | 0.7  | 3.5  |
| 10479 AT1G10670.2   Symbol: ACLA 1                                                                                                                                                                                                                                                                                                                                                                                                                                                                                                                                                                                                                                                                                                                                                                                                                                                                                                                                                                                                                                                                                                                          | 11.3 | 10.6 | 0.7  | 2.2  |
| 801 AT1G10960.1   ferredoxin, chloroplast, putative, strong similarity to FERREDOXIN PRECURSOR GB:P16972 (SP:P16972) from (Arabidopsis thaliana)   chr1:3664386-3665039 FORWARD   Aliases: T19D16.12, T19D16_12                                                                                                                                                                                                                                                                                                                                                                                                                                                                                                                                                                                                                                                                                                                                                                                                                                                                                                                                             | 11.3 | 7.2  | 4.1  | 10.3 |
| 356 AT4G24780.1   pectate lyase family protein, similar to pectate lyase GP:14289169 from (Salix gilgiana)                                                                                                                                                                                                                                                                                                                                                                                                                                                                                                                                                                                                                                                                                                                                                                                                                                                                                                                                                                                                                                                  | 11.3 | 4.5  | 6.8  | 13.4 |
| 426 AT1G61570.1   Symbol: TIM13   mitochondrial import inner membrane translocase (TIM13), identical to mitochondrial import inner membrane translocase subunit Tim13 (Arabidopsis thaliana) Swiss-Prot:Q9XH48; contains Pfam domain, PF02953: Tim10/DDP family zinc finger   chr1:22722370-22723181 REVERSE   Aliases: T25B24.8, T25B24_8, TIM13, translocase of the inner membrane 13                                                                                                                                                                                                                                                                                                                                                                                                                                                                                                                                                                                                                                                                                                                                                                     | 11.3 | 8.8  | 2.4  | 12.6 |
| 16213 AT3G62400.2   expressed protein, cytochrome c oxidase subunit 5c - Oryza sativa, EMBL:AB027123                                                                                                                                                                                                                                                                                                                                                                                                                                                                                                                                                                                                                                                                                                                                                                                                                                                                                                                                                                                                                                                        | 11.3 | 11.1 | 0.2  | 0.9  |
| 10970 AT1G06530.1   myosin heavy chain-related, similar to myosin heavy chain (GI:1408194) {Placopecten magellanicus}; similar to Myosin heavy chain, clone 203 (Fragment) (SP:P39922){Hydra attenuata}; contains one transmembrane domain   chr1:2001593-2002595 FORWARD   Aliases: F12K11.14, F12K11_14                                                                                                                                                                                                                                                                                                                                                                                                                                                                                                                                                                                                                                                                                                                                                                                                                                                   | 11.3 | 10.7 | 0.6  | 2.1  |
| 13561 AT1G09780.1   2,3-bisphosphoglycerate-independent phosphoglycerate mutase, putative / phosphoglyceromutase, putative, strong similarity to SP:Q42908 2,3-bisphosphoglycerate-independent phosphoglycerate mutase (EC 5.4.2.1) (Phosphoglyceromutase) {Mesembryanthemum crystallinum}; contains Pfam profile PF01676: Metalloenzyme superfamily   chr1:3165372-3167871 REVERSE   Aliases: F21M12.16, F21M12_16                                                                                                                                                                                                                                                                                                                                                                                                                                                                                                                                                                                                                                                                                                                                         | 11.3 | 11.8 | -0.6 | -1.5 |



|                                                                                                                                                                                                                                                                                                                                                                                                                                                                                                                                                                                                                                                                                                                                                                                                                                                                                                                                                                                                               |      |      |      |      |
|---------------------------------------------------------------------------------------------------------------------------------------------------------------------------------------------------------------------------------------------------------------------------------------------------------------------------------------------------------------------------------------------------------------------------------------------------------------------------------------------------------------------------------------------------------------------------------------------------------------------------------------------------------------------------------------------------------------------------------------------------------------------------------------------------------------------------------------------------------------------------------------------------------------------------------------------------------------------------------------------------------------|------|------|------|------|
| 804 AT5G16130.1   40S ribosomal protein S7 (RPS7C), 40S ribosomal protein S7 homolog - Brassica oleracea, EMBL:AF144752   chr5:5268424-5270091 FORWARD   Aliases: T21H19.50, T21H19_50                                                                                                                                                                                                                                                                                                                                                                                                                                                                                                                                                                                                                                                                                                                                                                                                                        | 11.3 | 8.8  | 2.4  | 10.2 |
| 3261 AT1G25275.3   expressed protein   chr1:8860659-8861349 FORWARD   Aliases: None                                                                                                                                                                                                                                                                                                                                                                                                                                                                                                                                                                                                                                                                                                                                                                                                                                                                                                                           | 11.3 | 10.4 | 0.9  | 5.8  |
| 13056 AT1G48850.3   Symbol: EMB1144   similar to 3-phosphoshikimate 1-carboxyvinyltransferase, putative / 5-enolpyruvylshikimate-3-phosphate, putative / EPSP synthase, putative [Arabidopsis thaliana] (TAIR:At1g48860.1); similar to chorismate synthase 1 [Lycopersicon esculentum] (GB:CAA79859.1); contains InterPro domain Chorismate synthase (InterPro:IPR000453)   chr1:18068245-18071758 REVERSE   Aliases: EMB1144, EMBRYO DEFECTIVE 1144, T24P22.3, T24P22_3                                                                                                                                                                                                                                                                                                                                                                                                                                                                                                                                      | 11.2 | 10.8 | 0.4  | 1.6  |
| 16713 AT5G04750.1   F1F0-ATPase inhibitor protein, putative, similar to F1F0-ATPase inhibitor protein (Oryza sativa (japonica cultivar-group)) gi:5106371:dbj:BAA81661   chr5:1372148-1374006 FORWARD   Aliases: MUK11.3                                                                                                                                                                                                                                                                                                                                                                                                                                                                                                                                                                                                                                                                                                                                                                                      | 11.2 | 11.3 | -0.1 | -0.8 |
| 9728 AT5G35630.2   Symbol: GS2   similar to glutamine synthetase, putative [Arabidopsis thaliana] (TAIR:At5g16570.1); similar to glutamine synthetase, putative [Arabidopsis thaliana] (TAIR:At5g37600.1); similar to glutamine synthetase, putative [Arabidopsis thaliana] (TAIR:At1g66200.1); similar to glutamine synthetase GS58 [Nicotiana attenuata] (GB:AAR86719.1); similar to glutamine synthetase precursor [Juglans nigra] (GB:AAD49734.1); similar to GLNA2_DAUCA Glutamine synthetase, chloroplast precursor (Glutamate--ammonia ligase) (GS2) (GB:O22506); similar to plastidic glutamine synthetase precursor [Brassica napus] (GB:CAA73062.1); similar to glutamine synthetase [Brassica napus] (GB:CAB72423.1); contains InterPro domain Glutamine synthetase, beta-Grasp domain (InterPro:IPR008147); contains InterPro domain Glutamine synthetase, catalytic domain (InterPro:IPR008146)   chr5:13848250-13850772 FORWARD   Aliases: ATGSL1, GLN2, GLUTAMINE SYNTHETASE 2, MJE4.9, MJE4_9 | 11.2 | 11.8 | -0.6 | -2.4 |
| 4429 AT4G32240.1   expressed protein   chr4:15568306-15569194 FORWARD   Aliases: F10M6.120, F10M6_120                                                                                                                                                                                                                                                                                                                                                                                                                                                                                                                                                                                                                                                                                                                                                                                                                                                                                                         | 11.2 | 10.4 | 0.8  | 4.9  |
| 3373 AT5G52470.1   Symbol: FIB1   fibrillar protein 1 (FBR1) (FIB1) (SKIP7), identical to fibrillar protein 1 GI:9965653 from (Arabidopsis thaliana); C-terminus identical to SKP1 interacting partner 7 GI:10716959 from (Arabidopsis thaliana); contains Pfam domain PF01269: Fibrillar protein   chr5:21311454-21313902 FORWARD   Aliases: ATFBR1, ATFIB1, FBR1, FIBRILLARIN 1, K24M7.22, K24M7_22, SKIP7, SKP1 INTERACTING PARTNER 7                                                                                                                                                                                                                                                                                                                                                                                                                                                                                                                                                                      | 11.2 | 10.4 | 0.8  | 5.7  |
| 4192 AT1G69510.3   expressed protein   chr1:26130049-26131596 FORWARD   Aliases: F10D13.16, F10D13_16                                                                                                                                                                                                                                                                                                                                                                                                                                                                                                                                                                                                                                                                                                                                                                                                                                                                                                         | 11.2 | 9.9  | 1.3  | 5.1  |
| 8289 AT3G08590.2   2,3-bisphosphoglycerate-independent phosphoglycerate mutase, putative / phosphoglyceromutase, putative, strong similarity to SP:Q42908 2,3-bisphosphoglycerate-independent phosphoglycerate mutase (EC 5.4.2.1) (Phosphoglyceromutase) {Mesembryanthemum crystallinum}; contains Pfam profile PF01676: Metalloenzyme superfamily   chr3:2608483-2611333 REVERSE   Aliases: F17O14.6                                                                                                                                                                                                                                                                                                                                                                                                                                                                                                                                                                                                        | 11.2 | 10.1 | 1.2  | 3.0  |
| 16097 AT2G04350.2   long-chain-fatty-acid--CoA ligase family protein / long-chain acyl-CoA synthetase family protein (LACS8), similar to LACS 4 (SP:O35547) from Rattus norvegicus, LACS 4 (SP:O60488) from Homo sapiens; contains Pfam HMM hit: AMP-binding enzymes PF00501                                                                                                                                                                                                                                                                                                                                                                                                                                                                                                                                                                                                                                                                                                                                  | 11.2 | 11.0 | 0.3  | 1.0  |
| 3836 AT3G25140.1   Symbol: QUA1   glycosyl transferase family 8 protein, contains Pfam profile: PF01501 glycosyl transferase family 8   chr3:9154718-9156851 FORWARD   Aliases: MJL12.8, QUASIMODO1                                                                                                                                                                                                                                                                                                                                                                                                                                                                                                                                                                                                                                                                                                                                                                                                           | 11.2 | 10.3 | 0.9  | 5.4  |
| 7255 AT3G01280.1   porin, putative, similar to SP:P42055 34 kDa outer mitochondrial membrane protein porin (Voltage-dependent anion-selective channel protein) (VDAC) {Solanum tuberosum}; contains Pfam profile PF01459: Eukaryotic porin   chr3:85619-87865 FORWARD   Aliases: T22N4.9, T22N4_9                                                                                                                                                                                                                                                                                                                                                                                                                                                                                                                                                                                                                                                                                                             | 11.2 | 9.1  | 2.1  | 3.4  |
| 720 AT5G43150.1   expressed protein   chr5:17342246-17343126 FORWARD   Aliases: MMG4.18, MMG4_18                                                                                                                                                                                                                                                                                                                                                                                                                                                                                                                                                                                                                                                                                                                                                                                                                                                                                                              | 11.2 | 10.1 | 1.1  | 10.7 |
| 718 AT3G05590.1   Symbol: RPL18   60S ribosomal protein L18 (RPL18B), similar to GB:P42791   chr3:1621486-1623020 FORWARD   Aliases: CYTOPLASMIC RIBOSOMAL PROTEIN L18, F18C1.14, F18C1_14, RIBOSOMAL PROTEIN L18                                                                                                                                                                                                                                                                                                                                                                                                                                                                                                                                                                                                                                                                                                                                                                                             | 11.2 | 9.1  | 2.1  | 10.7 |
| 13808 AT2G44350.2   Symbol: ATCS   citrate synthase, mitochondrial, putative, strong similarity to SP:P20115 Citrate synthase, mitochondrial precursor {Arabidopsis thaliana}; contains Pfam profile PF00285: Citrate synthase   chr2:18323354-18328158 FORWARD   Aliases: F4I1.16                                                                                                                                                                                                                                                                                                                                                                                                                                                                                                                                                                                                                                                                                                                            | 11.2 | 10.7 | 0.5  | 1.4  |
| 2735 AT5G59870.1   histone H2A, putative, similar to histone H2A Petroselinum crispum SP:P19177, Lycopersicon esculentum SP:P25469, Zea mays SP:P40280; contains Pfam profile PF00125 Core histone H2A/H2B/H3/H4   chr5:24132608-24133444 REVERSE   Aliases: MMN10.22, MMN10_22                                                                                                                                                                                                                                                                                                                                                                                                                                                                                                                                                                                                                                                                                                                               | 11.2 | 8.3  | 2.9  | 6.4  |
| 862 AT5G52650.1   40S ribosomal protein S10 (RPS10C), contains similarity to 40S ribosomal protein S10   chr5:21372841-21374301 REVERSE   Aliases: F6N7.14, F6N7_14                                                                                                                                                                                                                                                                                                                                                                                                                                                                                                                                                                                                                                                                                                                                                                                                                                           | 11.2 | 9.4  | 1.7  | 10.0 |
| 5497 AT2G42210.4   expressed protein, similar to hypothetical protein [Oryza sativa (japonica cultivar-group)] (GB:XP_450480.1); contains InterPro domain Mitochondrial import inner membrane translocase, subunit Tim17/22 (InterPro:IPR003397)   chr2:17597291-17598930 FORWARD   Aliases: T24P15.12, T24P15_12                                                                                                                                                                                                                                                                                                                                                                                                                                                                                                                                                                                                                                                                                             | 11.2 | 10.0 | 1.2  | 4.3  |
| 472 AT3G56800.1   Symbol: CAM3   calmodulin-2/3/5 (CAM3), identical to calmodulin GI:474183 from (Arabidopsis thaliana); almost identical to calmodulin-2/3/5 SP:P25069 (Arabidopsis thaliana)   chr3:21045656-21047053 REVERSE   Aliases: ACAM 3, CALMODULIN 3, T8M16.130                                                                                                                                                                                                                                                                                                                                                                                                                                                                                                                                                                                                                                                                                                                                    | 11.2 | 8.6  | 2.6  | 12.2 |

|                                                                                                                                                                                                                                                                                                                                                                                                                                                                                                                                                                                                                                                                                                                                                                                  |      |      |      |       |
|----------------------------------------------------------------------------------------------------------------------------------------------------------------------------------------------------------------------------------------------------------------------------------------------------------------------------------------------------------------------------------------------------------------------------------------------------------------------------------------------------------------------------------------------------------------------------------------------------------------------------------------------------------------------------------------------------------------------------------------------------------------------------------|------|------|------|-------|
| 13917 AT1G22410.1   2-dehydro-3-deoxyphosphoheptonate aldolase, putative / 3-deoxy-D-arabino-heptulosonate 7-phosphate synthase, putative / DAHP synthetase, putative, similar to 3-deoxy-D-arabino-heptulosonate 7-phosphate Gl:170224 from (Nicotiana tabacum), SP:P21357 from Solanum tuberosum; contains Pfam Class-II DAHP synthetase family domain PF01474   chr1:7912043-7914992 FORWARD   Aliases: F12K8.24, F12K8_24                                                                                                                                                                                                                                                                                                                                                    | 11.2 | 10.7 | 0.5  | 1.4   |
| 449 AT4G29410.1   60S ribosomal protein L28 (RPL28C), unknown protein chromosome II BAC F6F22 - Arabidopsis thaliana,PID:g3687251   chr4:14468250-14470173 REVERSE   Aliases: F17A13.230, F17A13_230                                                                                                                                                                                                                                                                                                                                                                                                                                                                                                                                                                             | 11.2 | 8.2  | 3.0  | 12.4  |
| 19962 AT3G21240.1   Symbol: 4CL2   4-coumarate--CoA ligase 2 / 4-coumaroyl-CoA synthase 2 (4CL2), identical to SP:Q9S725 4-coumarate--CoA ligase 2 (EC 6.2.1.12) (4CL2) (4-coumaroyl-CoA synthase 2) {Arabidopsis thaliana}   chr3:7454282-7457385 REVERSE   Aliases: COUMARATE:COA LIGASE, AT4CL2, MXL8.10                                                                                                                                                                                                                                                                                                                                                                                                                                                                      | 11.2 | 11.1 | 0.1  | 0.2   |
| 2542 AT3G48990.1   AMP-dependent synthetase and ligase family protein, similar to peroxisomal-coenzyme A synthetase (FAT2) (gi:586339) from Saccharomyces cerevisiae; contains Pfam AMP-binding enzyme domain PF00501; identical to cDNA; identical to cDNA adenosine monophosphate binding protein 3 AMPBP3 (AMPBP3)Gl:20799714   chr3:18169732-18172334 REVERSE   Aliases: T2J13.170                                                                                                                                                                                                                                                                                                                                                                                           | 11.2 | 12.3 | -1.2 | -6.6  |
| 5323 AT1G74020.1   Symbol: SS2   strictosidine synthase family protein, similar to strictosidine synthase (Rauvolfia serpentina)(SP:P15324); contains strictosidine synthase domain PF03088   chr1:27838792-27840970 REVERSE   Aliases: ATSS 2 STRICTOSIDINE SYNTHASE, F2P9.11, F2P9_11, STRICTOSIDINE SYNTHASE 2                                                                                                                                                                                                                                                                                                                                                                                                                                                                | 11.2 | 10.4 | 0.8  | 4.4   |
| 2449 AT4G16500.1   cysteine protease inhibitor family protein / cystatin family protein, similar to SP:Q06445 Cysteine proteinase inhibitor (Cystatin) {Vigna unguiculata}; contains Pfam profile PF00031: Cystatin domain   chr4:9301413-9302045 REVERSE   Aliases: DL4275C, FCAALL.171                                                                                                                                                                                                                                                                                                                                                                                                                                                                                         | 11.2 | 10.0 | 1.2  | 6.8   |
| 7536 AT3G09200.1   60S acidic ribosomal protein P0 (RPP0B), similar to putative 60S acidic ribosomal protein P0 GB:P50346 (Glycine max)   chr3:2823096-2825096 REVERSE   Aliases: F3L24.7                                                                                                                                                                                                                                                                                                                                                                                                                                                                                                                                                                                        | 11.2 | 9.9  | 1.3  | 3.3   |
| 4542 AT2G24765.1   ADP-ribosylation factor 3 (ARF3), identical to GP:453191 ADP-ribosylation factor 3 {Arabidopsis thaliana}; contains domain PF00025: ADP-ribosylation factor family   chr2:10569805-10572274 FORWARD   Aliases: F27A10.8                                                                                                                                                                                                                                                                                                                                                                                                                                                                                                                                       | 11.2 | 10.2 | 0.9  | 4.9   |
| 1678 AT3G18740.1   60S ribosomal protein L30 (RPL30C), similar to 60S RIBOSOMAL PROTEIN L30 GB:O49884 from (Lupinus luteus)                                                                                                                                                                                                                                                                                                                                                                                                                                                                                                                                                                                                                                                      | 11.2 | 9.9  | 1.2  | 7.9   |
| 2682 AT5G27700.1   40S ribosomal protein S21 (RPS21C), ribosomal protein S21, Zea mays, PIR:T03945   chr5:9807323-9808480 REVERSE   Aliases: T1G16.30, T1G16_30                                                                                                                                                                                                                                                                                                                                                                                                                                                                                                                                                                                                                  | 11.2 | 8.9  | 2.3  | 6.5   |
| 3589 AT2G34480.1   60S ribosomal protein L18A (RPL18aB)   chr2:14539787-14541280 REVERSE   Aliases: F13P17.34                                                                                                                                                                                                                                                                                                                                                                                                                                                                                                                                                                                                                                                                    | 11.2 | 9.4  | 1.7  | 5.6   |
| 2967 AT5G02450.1   60S ribosomal protein L36 (RPL36C), 60S ribosomal protein L36, Arabidopsis thaliana, EMBL:AC004684   chr5:533119-534635 FORWARD   Aliases: T22P11.40, T22P11_40                                                                                                                                                                                                                                                                                                                                                                                                                                                                                                                                                                                               | 11.2 | 9.9  | 1.3  | 6.2   |
| 690 AT3G53890.1   40S ribosomal protein S21 (RPS21B), ribosomal protein S21, cytosolic - Oryza sativa, PIR:S38357   chr3:19966322-19967327 REVERSE   Aliases: F5K20.190                                                                                                                                                                                                                                                                                                                                                                                                                                                                                                                                                                                                          | 11.2 | 8.1  | 3.0  | 10.8  |
| 1394 AT4G09800.1   Symbol: RPS18C                                                                                                                                                                                                                                                                                                                                                                                                                                                                                                                                                                                                                                                                                                                                                | 11.2 | 10.0 | 1.1  | 8.5   |
| 229 AT1G55490.2   Symbol: CPN60B                                                                                                                                                                                                                                                                                                                                                                                                                                                                                                                                                                                                                                                                                                                                                 | 11.1 | 5.9  | 5.3  | 15.7  |
| 350 AT4G02380.1   Symbol: SAG21   late embryogenesis abundant 3 family protein / LEA3 family protein, similar to several small proteins (~100 aa) that are induced by heat, auxin, ethylene and wounding such as Phaseolus aureus indole-3-acetic acid induced protein ARG (SW:32292); contains Pfam profile PF03242: Late embryogenesis abundant protein                                                                                                                                                                                                                                                                                                                                                                                                                        | 11.1 | 12.7 | -1.5 | -13.5 |
| 154 AT4G03280.2   Symbol: PETC   cytochrome B6-F complex iron-sulfur subunit, chloroplast / Rieske iron-sulfur protein / plastoquinol-plastocyanin reductase (petC), identical to gi:9843639; identical to cDNA rieske iron-sulfur protein precursor (petC) Gl:5725449   chr4:1440177-1441861 FORWARD   Aliases: F4C21.21, F4C21_21, PGR1, PHOTOSYNTHETIC ELECTRON TRANSFER C, PROTON GRADIENT REGULATION 1, RIESKE IRON SULFUR PROTEIN PRECURSOR                                                                                                                                                                                                                                                                                                                                | 11.1 | 4.1  | 7.0  | 17.9  |
| 3314 AT3G06700.3   similar to 60S ribosomal protein L29 (RPL29B) [Arabidopsis thaliana] (TAIR:At3g06680.1); similar to P0475H04.11 [Oryza sativa (japonica cultivar-group)] (GB:NP_914175.1); contains InterPro domain Ribosomal L29e protein (InterPro:IPR002673)   chr3:2117361-2117960 REVERSE   Aliases: T8E24.8                                                                                                                                                                                                                                                                                                                                                                                                                                                             | 11.1 | 9.0  | 2.2  | 5.8   |
| 5636 AT4G23100.2   Symbol: RML1   similar to gamma-glutamylcysteine synthetase [Brassica juncea] (GB:CAA06613.1); similar to glutamate-cysteine ligase [Brassica juncea] (GB:CAD91714.1); similar to gamma-glutamylcysteine synthetase precursor [Pisum sativum] (GB:AAF22137.1); similar to gamma-glutamylcysteine synthetase [Lotus corniculatus var. japonicus] (GB:AAO27827.1); similar to glutamate-cysteine ligase [Brassica juncea] (GB:CAD91713.1); contains InterPro domain Glutamate--cysteine ligase, plant (InterPro:IPR006336)   chr4:12103172-12107310 REVERSE   Aliases: CAD2, CADMIUM SENSITIVE 2, F7H19.290, F7H19_290, GAMMA GLUTAMYL CYSTEINE SYNTHETASE, GAMMA GLUTAMYL CYSTEINE SYNTHETASE 1, GAMMA GLUTAMYL CYSTEINE SYNTHETASE, GSH1, ROOT MERISTEMLESS 1 | 11.1 | 8.4  | 2.7  | 4.2   |
| 13107 AT1G35720.1   Symbol: ANNAT1                                                                                                                                                                                                                                                                                                                                                                                                                                                                                                                                                                                                                                                                                                                                               | 11.1 | 10.0 | 1.1  | 1.6   |

|                                                                                                                                                                                                                                                                                                                                                                                                 |      |      |     |      |
|-------------------------------------------------------------------------------------------------------------------------------------------------------------------------------------------------------------------------------------------------------------------------------------------------------------------------------------------------------------------------------------------------|------|------|-----|------|
| 15917 AT5G03290.1   isocitrate dehydrogenase, putative / NAD+ isocitrate dehydrogenase, putative, strong similarity to isocitrate dehydrogenase (NAD+) (Nicotiana tabacum) GI:3021506   chr5:793984-795995 FORWARD   Aliases: F12E4.20, F12E4_20                                                                                                                                                | 11.1 | 10.7 | 0.4 | 1.0  |
| 7302 AT2G28190.1   Symbol: CSD2   superoxide dismutase (Cu-Zn), chloroplast (SODCP) / copper/zinc superoxide dismutase (CSD2), identical to GP:3273753:AF061519   chr2:12021579-12023620 FORWARD   Aliases: COPPER/ZINC SUPEROXIDE DISMUTASE, COPPER/ZINC SUPEROXIDE DISMUTASE 2, CZSOD2, F24D13.2, F24D13_2                                                                                    | 11.1 | 9.4  | 1.7 | 3.4  |
| 1640 AT5G01600.1   Symbol: ATFER1                                                                                                                                                                                                                                                                                                                                                               | 11.1 | 8.5  | 2.6 | 8.0  |
| 7735 AT3G07230.1   wound-responsive protein-related, similar to wound-induced basic protein SP:Q09020 (Phaseolus vulgaris) (Plant Physiol. 101 (4), 1409 (1993))   chr3:2299780-2300273 FORWARD   Aliases: T1B9.10                                                                                                                                                                              | 11.1 | 9.6  | 1.5 | 3.2  |
| 736 AT1G22780.1   Symbol: PFL   40S ribosomal protein S18 (RPS18A), Match to ribosomal S18 gene mRNA gb:Z28701, DNA gb:Z23165 from A. thaliana. ESTs gb:T21121, gb:Z17755, gb:R64776 and gb:R30430 come from this gene   chr1:8067853-8069319 FORWARD   Aliases: 40S RIBOSOMAL PROTEIN S18, PFL1, POINTED FIRST LEAVES, RPS18A, T22J18.5, T22J18_5                                              | 11.1 | 9.0  | 2.1 | 10.6 |
| 187 AT3G23940.1   dehydratase family, contains Pfam profile: PF00920 dehydratase family   chr3:8648712-8652564 FORWARD   Aliases: F14O13.18                                                                                                                                                                                                                                                     | 11.1 | 7.2  | 4.0 | 16.8 |
| 980 AT2G32060.3   40S ribosomal protein S12 (RPS12C)   chr2:13646122-13647257 REVERSE   Aliases: F22D22.19, F22D22_19                                                                                                                                                                                                                                                                           | 11.1 | 8.5  | 2.6 | 9.6  |
| 685 AT1G04480.1   60S ribosomal protein L23 (RPL23A), identical to GB:AAB80655   chr1:1216094-1217457 FORWARD   Aliases: F19P19.5, F19P19_5                                                                                                                                                                                                                                                     | 11.1 | 9.5  | 1.6 | 10.8 |
| 380 AT4G18280.1   glycine-rich cell wall protein-related, glycine-rich protein 1.0 precursor, Phaseolus vulgaris, PIR1:S01821   chr4:10104007-10104735 FORWARD   Aliases: T9A21.130, T9A21_130                                                                                                                                                                                                  | 11.1 | 7.0  | 4.1 | 13.1 |
| 7188 AT5G09810.1   Symbol: ACT7   actin 7 (ACT7) / actin 2, identical to SP:P53492 Actin 7 (Actin-2) {Arabidopsis thaliana}   chr5:3052167-3054615 FORWARD   Aliases: ACTIN_2, MYH9.2, MYH9_2                                                                                                                                                                                                   | 11.1 | 9.4  | 1.7 | 3.5  |
| 12996 AT3G04120.1   Symbol: GAPC   glyceraldehyde-3-phosphate dehydrogenase, cytosolic (GAPC) / NAD-dependent glyceraldehyde-3-phosphate dehydrogenase, identical to SP:P25858 Glyceraldehyde 3-phosphate dehydrogenase, cytosolic (EC 1.2.1.12) {Arabidopsis thaliana}   chr3:1080960-1083537 FORWARD   Aliases: GLYCERALDEHYDE 3 PHOSPHATE DEHYDROGENASE C SUBUNIT, T6K12.26, T6K12_26        | 11.1 | 10.1 | 1.0 | 1.6  |
| 7013 AT2G17390.1   ankyrin repeat family protein, contains ankyrin repeats, Pfam:PF00023   chr2:7562732-7565120 FORWARD   Aliases: F5J6.15, F5J6_15                                                                                                                                                                                                                                             | 11.1 | 10.4 | 0.7 | 3.5  |
| 6486 AT4G11600.1   Symbol: ATGPX6                                                                                                                                                                                                                                                                                                                                                               | 11.1 | 9.8  | 1.3 | 3.8  |
| 422 AT3G23390.1   60S ribosomal protein L36a/L44 (RPL36aA), similar to ribosomal protein L41 GB:AAA34366 from (Candida maltosa)   chr3:8375382-8376397 FORWARD   Aliases: MLM24.22                                                                                                                                                                                                              | 11.1 | 9.1  | 2.0 | 12.6 |
| 2201 AT5G01210.1   transferase family protein, contains Pfam profile PF02458 transferase family   chr5:84473-86274 FORWARD   Aliases: F7J8.190, F7J8_190                                                                                                                                                                                                                                        | 11.1 | 9.0  | 2.1 | 7.1  |
| 3022 AT4G27130.1   eukaryotic translation initiation factor SUI1, putative, similar to SP:P32911 Protein translation factor SUI1 {Saccharomyces cerevisiae}; contains Pfam profile PF01253: Translation initiation factor SUI1   chr4:13604601-13606454 REVERSE   Aliases: T24A18.80, T24A18_80                                                                                                 | 11.1 | 9.9  | 1.2 | 6.1  |
| 1962 AT5G43330.1   malate dehydrogenase, cytosolic, putative, strong similarity to cytosolic malate dehydrogenase (EC 1.1.1.37) SP:O24047 {Mesembryanthemum crystallinum}, SP:O48905 {Medicago sativa}, (Prunus persica) GI:15982948; contains InterPro entry IPR001236: Lactate/malate dehydrogenase   chr5:17407661-17409867 FORWARD   Aliases: MWF20.2, MWF20_2                              | 11.1 | 5.8  | 5.2 | 7.5  |
| 6601 AT5G37510.2   Symbol: EMB1467   NADH-ubiquinone dehydrogenase, mitochondrial, putative, similar to NADH-ubiquinone oxidoreductase 75 kDa subunit, mitochondrial from Solanum tuberosum (SP:Q43644)   chr5:14914640-14917877 FORWARD   Aliases: EMB1467, EMBRYO DEFECTIVE 1467, MPA22.5, MPA22_5                                                                                            | 11.1 | 8.7  | 2.4 | 3.7  |
| 1443 AT1G14810.1   semialdehyde dehydrogenase family protein, similar to SP:O31219 Aspartate-semialdehyde dehydrogenase (EC 1.2.1.11) (ASA dehydrogenase) (ASADH) {Legionella pneumophila}; contains Pfam profiles PF02774: Semialdehyde dehydrogenase dimerisation domain, PF01118: Semialdehyde dehydrogenase NAD binding domain   chr1:5102419-5104684 REVERSE   Aliases: F10B6.22, F10B6_22 | 11.1 | 7.5  | 3.5 | 8.4  |
| 4568 AT5G02500.1   Symbol: HSC70 1   heat shock cognate 70 kDa protein 1 (HSC70-1) (HSP70-1), identical to SP:P22953 Heat shock cognate 70 kDa protein 1 (Hsc70.1) {Arabidopsis thaliana}   chr5:553743-556437 REVERSE   Aliases: AT HSC70 1, HSC70, HSP70 1, T22P11.90, T22P11_90                                                                                                              | 11.1 | 10.2 | 0.9 | 4.8  |
| 1087 AT5G64140.1   Symbol: RPS28   40S ribosomal protein S28 (RPS28C)   chr5:25684550-25685518 REVERSE   Aliases: MHJ24.12, MHJ24_12, RIBOSOMAL PROTEIN S28                                                                                                                                                                                                                                     | 11.1 | 9.0  | 2.1 | 9.3  |
| 11162 AT3G60300.1   RWD domain-containing protein, contains weak similarity to RING finger protein 25 (RING finger protein AO7) (Swiss-Prot:Q9QZR0) (Mus musculus)   chr3:22296306-22298454 FORWARD   Aliases: F27H5.90                                                                                                                                                                         | 11.1 | 10.8 | 0.3 | 2.0  |



|                                                                                                                                                                                                                                                                                                                                                                                                                                  |      |      |      |      |
|----------------------------------------------------------------------------------------------------------------------------------------------------------------------------------------------------------------------------------------------------------------------------------------------------------------------------------------------------------------------------------------------------------------------------------|------|------|------|------|
| 1623 AT5G55190.1   Symbol: RAN3   Ras-related GTP-binding protein (RAN3), identical to atran3 (Arabidopsis thaliana) GI:2058280   chr5:22409402-22411392 FORWARD   Aliases: MCO15.14, MCO15_14                                                                                                                                                                                                                                   | 11.1 | 9.8  | 1.3  | 8.0  |
| 10684 AT3G05880.1   Symbol: RCI2A   hydrophobic protein (RCI2A) / low temperature and salt responsive protein (LTI6A), identical to SP:Q9ZNQ7 Hydrophobic protein RCI2A (Low temperature and salt responsive protein LTI6A) {Arabidopsis thaliana}   chr3:1755503-1756546 REVERSE   Aliases: F10A16.18, F10A16_18, RARE COLD INDUCIBLE 2A                                                                                        | 11.1 | 11.6 | -0.5 | -2.2 |
| 15389 AT3G23600.2   similar to diene lactone hydrolase family protein [Arabidopsis thaliana] (TAIR:At3g23570.1); similar to 'putative endo-1,3;1,4-beta-D-glucanase' [Oryza sativa (japonica cultivar-group)] (GB:AAU10803.1); contains InterPro domain Diene lactone hydrolase (InterPro:IPR002925)   chr3:8473802-8475895 FORWARD   Aliases: MDB19.8                                                                           | 11.1 | 10.7 | 0.4  | 1.1  |
| 3660 AT5G01350.1   expressed protein   chr5:145635-147199 REVERSE   Aliases: T1008.60, T1008_60                                                                                                                                                                                                                                                                                                                                  | 11.1 | 9.9  | 1.1  | 5.5  |
| 338 AT3G62840.1   small nuclear ribonucleoprotein D2, putative / snRNP core protein D2, putative / Sm protein D2, putative, similar to small nuclear ribonucleoprotein Sm D2 (snRNP core protein D2) (Sm-D2) (Mus musculus) SWISS-PROT:P43330   chr3:23246086-23247791 REVERSE   Aliases: F26K9.270                                                                                                                              | 11.1 | 8.2  | 2.8  | 13.7 |
| 1655 AT3G51800.2   Symbol: ATG2   metalloproteinase M24 family protein, similar to SP:P50580 Proliferation-associated protein 2G4 {Mus musculus}; contains Pfam profile PF00557: metalloproteinase family M24   chr3:19222004-19224646 REVERSE   Aliases: ATEM1.5                                                                                                                                                                | 11.1 | 9.2  | 1.8  | 7.9  |
| 705 AT2G36160.1   40S ribosomal protein S14 (RPS14A)   chr2:15176897-15178428 FORWARD   Aliases: F9C22.9, F9C22_9                                                                                                                                                                                                                                                                                                                | 11.0 | 9.4  | 1.6  | 10.7 |
| 20602 AT3G23820.1   Symbol: GAE6   NAD-dependent epimerase/dehydratase family protein, similar to nucleotide sugar epimerase from Vibrio vulnificus GI:3093975 (PID:g3093975), WbnF (Escherichia coli) GI:5739472, CAPI protein {Staphylococcus aureus} SP:P39858; contains Pfam profile: PF01370 NAD dependent epimerase/dehydratase family   chr3:8603451-8605469 FORWARD   Aliases: F14O13.9, UDP D GLUCURONATE 4 EPIMERASE 6 | 11.0 | 11.1 | -0.0 | -0.1 |
| 13251 AT5G09220.1   Symbol: AAP2   amino acid permease 2 (AAP2), identical to amine acid permease AAP2 (Arabidopsis thaliana) GI:510236   chr5:2866253-2869055 FORWARD   Aliases: AMINO ACID PERMEASE 2, T2K12.6                                                                                                                                                                                                                 | 11.0 | 9.9  | 1.2  | 1.5  |
| 2648 AT4G35450.4   Symbol: AKR2   ankyrin repeat family protein / AFT protein (AFT), contains ankyrin repeats, Pfam:PF00023; identical to cDNA AFT protein (AFT) GI:3478699   chr4:16839933-16842082 FORWARD   Aliases: AFT, ANKYRIN REPEAT CONTAINING PROTEIN 2, F15J1.20, F15J1_20                                                                                                                                             | 11.0 | 8.6  | 2.4  | 6.5  |
| 18 AT2G02120.1   Symbol: LCR70/PDF2.1   plant defensin-fusion protein, putative (PDF2.1), plant defensin protein family member, personal communication, Bart Thomma (Bart.Thomma@agr.kuleuven.ac.be); contains a gamma-thionin family signature (PDOC00725)   chr2:538254-539054 FORWARD   Aliases: F5O4.11, F5O4_11, LCR70, Low molecular weight cysteine rich 70, PDF2.1                                                       | 11.0 | 3.3  | 7.7  | 33.0 |
| 7767 AT2G33470.2   glycolipid transfer protein-related, similar to phosphoinositol 4-phosphate adaptor protein-2 (GI:14165198) (Homo sapiens); similar to Glycolipid transfer protein (GLTP) (Swiss-Prot:Q9JL62) (Mus musculus); similar to Glycolipid transfer protein (GLTP) (Swiss-Prot:Q9NZD2) (Homo sapiens)   chr2:14183492-14185543 REVERSE   Aliases: F4P9.24, F4P9_24                                                   | 11.0 | 9.8  | 1.3  | 3.2  |
| 8586 AT1G78380.1   Symbol: ATGSTU19   glutathione S-transferase, putative, similar to glutathione transferase GI:2853219 from (Carica papaya)   chr1:29491306-29492799 REVERSE   Aliases: F3F9.11, F3F9_11, GLUTATHIONE TRANSFERASE 8, GST8                                                                                                                                                                                      | 11.0 | 10.2 | 0.8  | 2.9  |
| 12366 AT2G44100.1   Symbol: ATGDI1                                                                                                                                                                                                                                                                                                                                                                                               | 11.0 | 10.2 | 0.8  | 1.7  |
| 16889 AT5G45130.1   Symbol: RHA1   Ras-related protein (RHA1) / small GTP-binding protein, identical to Ras-related protein RHA1 SP:P31582 from (Arabidopsis thaliana)   chr5:18261493-18263670 FORWARD   Aliases: K17O22.15, K17O22_15                                                                                                                                                                                          | 11.0 | 11.2 | -0.2 | -0.8 |
| 19785 AT1G60710.1   Symbol: ATB2   aldo/keto reductase family protein, contains Pfam profile PF00248: oxidoreductase, aldo/keto reductase family   chr1:22358418-22360407 REVERSE   Aliases: F8A5.23, F8A5_23                                                                                                                                                                                                                    | 11.0 | 11.1 | -0.1 | -0.2 |
| 2614 AT5G09590.1   Symbol: mtHSC70 2   heat shock protein 70 / HSP70 (HSC70-5), identical to heat shock protein 70 (Arabidopsis thaliana) GI:6746590   chr5:2975576-2978751 FORWARD   Aliases: F17I14.220, F17I14_220, HEAT SHOCK PROTEIN 70, HSC70 5                                                                                                                                                                            | 11.0 | 8.4  | 2.7  | 6.6  |
| 8776 AT3G48680.1   bacterial transferase hexapeptide repeat-containing protein, contains Pfam profile PF00132: Bacterial transferase hexapeptide (four repeats); ferripyochelin binding protein - Methanobacterium thermoautotrophicum, EMBL:AE000918.1   chr3:18046092-18047789 FORWARD   Aliases: T8P19.190                                                                                                                    | 11.0 | 9.9  | 1.2  | 2.8  |
| 1143 AT2G47710.1   universal stress protein (USP) family protein, similar to ER6 protein (Lycopersicon esculentum) GI:5669654; contains Pfam profile PF00582: universal stress protein family   chr2:19561904-19563135 REVERSE   Aliases: F17A22.10                                                                                                                                                                              | 11.0 | 7.1  | 3.9  | 9.1  |
| 9446 AT5G54760.1   eukaryotic translation initiation factor SUI1, putative, similar to SP:P32911 Protein translation factor SUI1 {Saccharomyces cerevisiae}; contains Pfam profile PF01253: Translation initiation factor SUI1   chr5:22261112-22262961 FORWARD   Aliases: MBG8.2, MBG8_2                                                                                                                                        | 11.0 | 10.4 | 0.7  | 2.6  |



|                                                                                                                                                                                                                                                                                                                                                                                                                                                                                                                                                                                                                                                                                                                                                                                                                                                                                                                                                                                     |      |      |      |      |
|-------------------------------------------------------------------------------------------------------------------------------------------------------------------------------------------------------------------------------------------------------------------------------------------------------------------------------------------------------------------------------------------------------------------------------------------------------------------------------------------------------------------------------------------------------------------------------------------------------------------------------------------------------------------------------------------------------------------------------------------------------------------------------------------------------------------------------------------------------------------------------------------------------------------------------------------------------------------------------------|------|------|------|------|
| 7339 AT4G39090.1   Symbol: RD19   cysteine proteinase RD19a (RD19A) / thiol protease, identical to cysteine proteinase RD19a, thiol protease SP:P43296, GI:435618 from (Arabidopsis thaliana)   chr4:18214569-18217476 REVERSE   Aliases: EMB3005, EMBRYO DEFECTIVE 3005, F19H22.190, F19H22_190, RD19A, RESPONSIVE TO DEHYDRATION 19                                                                                                                                                                                                                                                                                                                                                                                                                                                                                                                                                                                                                                               | 11.0 | 12.7 | -1.7 | -3.4 |
| 5984 AT4G31300.2   Symbol: PBA1   similar to 20S proteasome beta subunit E1 (PBE1) (PRCE) [Arabidopsis thaliana] (TAIR:At1g13060.1); similar to PREDICTED OJ1079_F11.26 gene product [Oryza sativa (japonica cultivar-group)] (GB:XP_507536.1); contains InterPro domain Proteasome B-type subunit (InterPro:IPR000243); contains InterPro domain Multispecific proteasome protease (InterPro:IPR001353)   chr4:15188769-15191159 FORWARD   Aliases: 20S PROTEASOME SUBUNIT PBA1, F8F16.120, F8F16_120                                                                                                                                                                                                                                                                                                                                                                                                                                                                              | 11.0 | 9.2  | 1.8  | 4.0  |
| 16165 AT2G05710.1   aconitate hydratase, cytoplasmic, putative / citrate hydro-lyase/aconitase, putative, nearly identical to SP:P49608 Aconitate hydratase, cytoplasmic (EC 4.2.1.3) (Citrate hydro-lyase) (Aconitase) {Cucurbita maxima}; contains Pfam profiles PF00330: Aconitase family (aconitate hydratase), PF00694: Aconitase C-terminal domain   chr2:2141396-2146675 FORWARD   Aliases: T3P4.5, T3P4_5                                                                                                                                                                                                                                                                                                                                                                                                                                                                                                                                                                   | 11.0 | 10.7 | 0.3  | 0.9  |
| 4276 AT5G47435.2   formyltetrahydrofolate deformylase, putative, similar to formyltetrahydrofolate deformylase (strain PCC 6803- Synechocystis sp.) SWISS-PROT:Q55135   chr5:19258930-19261181 FORWARD   Aliases: None                                                                                                                                                                                                                                                                                                                                                                                                                                                                                                                                                                                                                                                                                                                                                              | 11.0 | 9.9  | 1.1  | 5.0  |
| 3849 AT1G24360.1   3-oxoacyl-(acyl-carrier protein) reductase, chloroplast / 3-ketoacyl-acyl carrier protein reductase, identical to 3-oxoacyl-(acyl-carrier protein) reductase SP:P33207 from (Arabidopsis thaliana)   chr1:8640725-8643467 FORWARD   Aliases: F21J9.2, F21J9.34, F21J9_34                                                                                                                                                                                                                                                                                                                                                                                                                                                                                                                                                                                                                                                                                         | 11.0 | 9.8  | 1.2  | 5.4  |
| 2699 AT1G16740.1   ribosomal protein L20 family protein, similar to ribosomal protein L20 GI:3603025 from (Guillardia theta)   chr1:5727683-5729072 FORWARD   Aliases: F19K19.15                                                                                                                                                                                                                                                                                                                                                                                                                                                                                                                                                                                                                                                                                                                                                                                                    | 11.0 | 9.0  | 2.0  | 6.5  |
| 1282 AT4G34620.1   Symbol: SSR16   ribosomal protein S16 family protein, ribosomal protein S16, Neurospora crassa, PIR2:A29927   chr4:16534867-16536176 REVERSE   Aliases: RIBOSOMAL PROTEIN S16, T4L20.200, T4L20_200                                                                                                                                                                                                                                                                                                                                                                                                                                                                                                                                                                                                                                                                                                                                                              | 11.0 | 9.0  | 2.0  | 8.8  |
| 6854 AT3G46440.2   Symbol: UXS5   similar to NAD-dependent epimerase/dehydratase family protein [Arabidopsis thaliana] (TAIR:At2g28760.2); similar to NAD-dependent epimerase/dehydratase family protein [Arabidopsis thaliana] (TAIR:At2g28760.1); similar to UDP-glucuronic acid decarboxylase (UXS3) [Arabidopsis thaliana] (TAIR:At5g59290.1); similar to UDP-D-glucuronate carboxy-lyase [Pisum sativum] (GB:BAB40967.1); contains InterPro domain NAD-dependent epimerase/dehydratase (InterPro:IPR001509)   chr3:17100030-17102811 REVERSE   Aliases: F18L15.160                                                                                                                                                                                                                                                                                                                                                                                                             | 11.0 | 8.5  | 2.5  | 3.6  |
| 1112 AT1G34030.1   40S ribosomal protein S18 (RPS18B), similar to ribosomal protein S18 GI:38422 from (Homo sapiens)   chr1:12370055-12371530 REVERSE   Aliases: F12G12.15, F12G12_15                                                                                                                                                                                                                                                                                                                                                                                                                                                                                                                                                                                                                                                                                                                                                                                               | 11.0 | 7.7  | 3.3  | 9.2  |
| 8932 AT4G15470.1   expressed protein, low similarity to N-methyl-D-aspartate receptor-associated protein (Drosophila melanogaster) GI:567104; contains Pfam profile PF01027: Uncharacterized protein family UPF0005                                                                                                                                                                                                                                                                                                                                                                                                                                                                                                                                                                                                                                                                                                                                                                 | 11.0 | 9.8  | 1.2  | 2.7  |
| 7228 AT5G13450.2   similar to F1-ATP synthase delta subunit [Ipomoea batatas] (GB:BAA77508.1); similar to oligomycin sensitivity conferring protein [Silene latifolia] (GB:AAN38066.1); contains InterPro domain H+-transporting two-sector ATPase, delta (OSCP) subunit (InterPro:IPR000711)   chr5:4310317-4312015 REVERSE   Aliases: T22N19.100, T22N19_100                                                                                                                                                                                                                                                                                                                                                                                                                                                                                                                                                                                                                      | 11.0 | 9.5  | 1.5  | 3.4  |
| 2014 NA                                                                                                                                                                                                                                                                                                                                                                                                                                                                                                                                                                                                                                                                                                                                                                                                                                                                                                                                                                             | 11.0 | 9.8  | 1.2  | 7.4  |
| 3856 AT4G31990.3   Symbol: ASP5   similar to aspartate aminotransferase, cytoplasmic isozyme 1 / transaminase A (ASP2) [Arabidopsis thaliana] (TAIR:At5g19550.1); similar to Asp aminotransferase (GB:1908424A); similar to aspartate transaminase (EC 2.6.1.1) AAT5 precursor - soybean (GB:S33528); similar to aspartate aminotransferase [Lotus corniculatus] (GB:AAC12674.1); similar to aspartate aminotransferase [Phaseolus vulgaris] (GB:AAN76499.1); similar to aspartate aminotransferase isozyme 5 [Glycine max] (GB:AAB26677.2); contains InterPro domain Aminotransferase, class I and II (InterPro:IPR004839); contains InterPro domain Aminotransferases class-I pyridoxal-phosphate-binding site (InterPro:IPR004838); contains InterPro domain Aspartate/other aminotransferase (InterPro:IPR000796)   chr4:15470767-15473859 REVERSE   Aliases: AAT3, ASPARTATE AMINOTRANSFERASE, ASPARTATE AMINOTRANSFERASE 5, ASPARTATE AMINOTRANSFERASE DEFICIENT 3, F11C18.15 | 11.0 | 9.3  | 1.7  | 5.4  |
| 7306 AT2G27730.1   expressed protein, contains 1 transmembrane domain; similar to Unknown mitochondrial protein At2g27730 (Swiss-Prot:Q9ZUX4) (Arabidopsis thaliana) similar to F1F0-ATPase inhibitor protein (GI:5821432) (Oryza sativa)   chr2:11826906-11828955 REVERSE   Aliases: F15K20.17, F15K20_17                                                                                                                                                                                                                                                                                                                                                                                                                                                                                                                                                                                                                                                                          | 11.0 | 10.2 | 0.8  | 3.4  |
| 10142 AT5G39950.1   Symbol: ATTRX2                                                                                                                                                                                                                                                                                                                                                                                                                                                                                                                                                                                                                                                                                                                                                                                                                                                                                                                                                  | 11.0 | 10.1 | 0.9  | 2.3  |
| 250 AT1G27435.1   expressed protein   chr1:9527561-9528865 REVERSE   Aliases: None                                                                                                                                                                                                                                                                                                                                                                                                                                                                                                                                                                                                                                                                                                                                                                                                                                                                                                  | 11.0 | 8.3  | 2.7  | 15.3 |
| 816 AT3G03640.1   Symbol: GLUC   glycosyl hydrolase family 1 protein, contains Pfam PF00232 : Glycosyl hydrolase family 1 domain; TIGRFAM TIGR01233: 6-phospho-beta-galactosidase; identical to beta-glucosidase GB:AAC31962 (Arabidopsis thaliana); similar to thioglucoside glucohydrolase (GI:984052) (Arabidopsis thaliana)   chr3:881031-884163 FORWARD   Aliases: BETA GLUCOSIDASE, T12J13.8, T12J13_8                                                                                                                                                                                                                                                                                                                                                                                                                                                                                                                                                                        | 11.0 | 6.7  | 4.3  | 10.2 |

|                                                                                                                                                                                                                                                                                                                                                                                                                                                                                                        |      |      |      |      |
|--------------------------------------------------------------------------------------------------------------------------------------------------------------------------------------------------------------------------------------------------------------------------------------------------------------------------------------------------------------------------------------------------------------------------------------------------------------------------------------------------------|------|------|------|------|
| 531 AT2G21130.1   peptidyl-prolyl cis-trans isomerase / cyclophilin (CYP2) / rotamase, identical to cyclophilin (Arabidopsis thaliana) gi:2443757:gb:AAB71402; similar to peptidyl-prolyl cis-trans isomerase, PPIase (cyclophilin, cyclosporin A-binding protein) (Arabidopsis thaliana) SWISS-PROT:P34790   chr2:9062479-9063313 REVERSE   Aliases: F26H11.11, F26H11_11                                                                                                                             | 11.0 | 5.0  | 6.0  | 11.7 |
| 47 AT1G64110.2   AAA-type ATPase family protein, contains Pfam domain, PF00004: ATPase, AAA family   chr1:23800382-23805388 REVERSE   Aliases: F22C12.12, F22C12_12                                                                                                                                                                                                                                                                                                                                    | 11.0 | 3.3  | 7.7  | 26.6 |
| 4706 AT3G16770.1   Symbol: ATEBP/RAP2.3   Encodes a member of the ERF (ethylene response factor) subfamily B-2 of ERF/AP2 transcription factor family (RAP2.3). The protein contains one AP2 domain. There are 5 members in this subfamily including RAP2.2 AND RAP2.12.   chr3:5705721-5707029 FORWARD   Aliases: ATEBP, MGL6.1, RAP2.3, RELATED TO AP2 3                                                                                                                                             | 11.0 | 9.2  | 1.8  | 4.8  |
| 7269 AT5G05370.1   ubiquinol-cytochrome C reductase complex ubiquinone-binding protein, putative / ubiquinol-cytochrome C reductase complex 8.2 kDa protein, putative, strong similarity to SP:P46269 Ubiquinol-cytochrome C reductase complex ubiquinone-binding protein QP-C (EC 1.10.2.2) (Ubiquinol-cytochrome C reductase complex 8.2 kDa protein) {Solanum tuberosum}                                                                                                                            | 11.0 | 10.5 | 0.4  | 3.4  |
| 8917 AT5G11500.1   expressed protein, contains Pfam profile PF05670: Domain of unknown function (DUF814)   chr5:3676641-3679347 FORWARD   Aliases: F15N18.90, F15N18_90                                                                                                                                                                                                                                                                                                                                | 11.0 | 10.3 | 0.7  | 2.7  |
| 3793 AT5G42190.1   Symbol: ASK2   E3 ubiquitin ligase SCF complex subunit SKP1/ASK1 (At2) / UFO-binding protein (UIP2), E3 ubiquitin ligase; skp1b; identical to UIP2 GI:3719211 from (Arabidopsis thaliana); contains Pfam profiles PF01466: Skp1 family, dimerisation domain and PF03931:Skp1 family, tetramerisation domain; identical to cDNA UFO binding protein UIP2 mRNA, partial cds GI:3719210   chr5:16870883-16872793 REVERSE   Aliases: ARABIDOPSIS SKP1 LIKE 2, MJC20.30, MJC20_30, SKP1B | 11.0 | 8.6  | 2.4  | 5.4  |
| 3707 AT1G48440.1   expressed protein   chr1:17910669-17912191 FORWARD   Aliases: T1N15.5, T1N15_5                                                                                                                                                                                                                                                                                                                                                                                                      | 11.0 | 9.8  | 1.2  | 5.5  |
| 6613 AT5G03300.1   Symbol: ADK2   adenosine kinase 2 (ADK2), contains Pfam profile: PF00294 pfkB family carbohydrate kinase; identical to cDNA adenosine kinase 2 (ADK2) GI:12017763   chr5:796441-799153 FORWARD   Aliases: ADENOSINE KINASE 2, F12E4.30, F12E4_30                                                                                                                                                                                                                                    | 11.0 | 9.8  | 1.1  | 3.7  |
| 4467 AT4G30190.1   Symbol: AHA2   ATPase 2, plasma membrane-type, putative / proton pump 2, putative / proton-exporting ATPase, putative, strong similarity to SP:P19456 ATPase 2, plasma membrane-type (EC 3.6.3.6) (Proton pump 2) {Arabidopsis thaliana}; contains InterPro accession IPR001757: ATPase, E1-E2 type; contains Pfam profile PF00690: Cation transporter/ATPase, N-terminus   chr4:14770505-14776059 REVERSE   Aliases: F9N11.40, F9N11_40, P TYPE H(+) ATPASE ISOFORM 2, PMA2        | 10.9 | 12.2 | -1.2 | -4.9 |
| 4830 AT4G17390.1   60S ribosomal protein L15 (RPL15B)   chr4:9714225-9715624 REVERSE   Aliases: DL4730C, FCAALL.32                                                                                                                                                                                                                                                                                                                                                                                     | 10.9 | 9.9  | 1.0  | 4.7  |
| 6610 AT1G15950.1   Symbol: CCR1   cinnamoyl-CoA reductase, putative, nearly identical to CCR1 (GI:12034897), similar to cinnamoyl CoA reductase GI:2058310 from (Eucalyptus gunnii)   chr1:5478748-5482159 FORWARD   Aliases: CINNAMOYL COA REDUCTASE, CINNAMOYL COA REDUCTASE 1, IRREGULAR XYLEM 4, IRX4, T24D18.5, T24D18_5                                                                                                                                                                          | 10.9 | 9.3  | 1.7  | 3.7  |
| 18957 AT1G13930.1   expressed protein, weakly similar to drought-induced protein SDi-6 (PIR:S71562) common sunflower (fragment)   chr1:4761039-4761722 FORWARD   Aliases: F16A14.14                                                                                                                                                                                                                                                                                                                    | 10.9 | 10.8 | 0.1  | 0.4  |
| 1102 AT1G10760.1   Symbol: SEX1   starch excess protein (SEX1), identical to SEX1 (Arabidopsis thaliana) GI:12044358; supporting cDNA gi:12044357:gb:AF312027.1:AF312027   chr1:3581035-3590044 REVERSE   Aliases: GWD1, SEX1, SOP, SOP1, STARCH EXCESS 1 PROTEIN, STARCH EXCESS 1, T16B5.10, T16B5_10                                                                                                                                                                                                 | 10.9 | 8.8  | 2.2  | 9.2  |
| 3931 AT4G14800.1   Symbol: PBD2   20S proteasome beta subunit D2 (PBD2) (PRCGA), identical to SP:O24633 Proteasome subunit beta type 2-2 (EC 3.4.25.1) (20S proteasome alpha subunit D2) {Arabidopsis thaliana}, cDNA proteasome subunit prcga GI:2511571   chr4:8500283-8502224 FORWARD   Aliases: 20S PROTEASOME BETA SUBUNIT 2, 20S PROTEASOME BETA SUBUNIT PBD2, DL3440W, FCAALL.135                                                                                                               | 10.9 | 8.6  | 2.4  | 5.3  |
| 9420 AT1G53320.1   F-box family protein / tubby family protein (TULP7), similar to Tubby related protein 2 (Tubby-like protein 2) (P4-6 protein) (Fragment) (SP:P46686) (Mus musculus); similar to phosphodiesterase (GI:467578) (Mus musculus); similar to Tubby protein homolog 1. (Swiss-Prot:Q09306) (Caenorhabditis elegans) contains Pfam profile: PF01167: Tub family; contains Pfam PF00646: F-box domain   chr1:19894682-19897159 REVERSE   Aliases: F12M16.22, F12M16_22                     | 10.9 | 10.5 | 0.5  | 2.6  |
| 1931 AT5G27850.1   60S ribosomal protein L18 (RPL18C), 60S ribosomal protein L18, Arabidopsis thaliana, SWISSPROT:RL18_ARATH   chr5:9873160-9874602 FORWARD   Aliases: F14I23.10, F14I23_10                                                                                                                                                                                                                                                                                                            | 10.9 | 9.1  | 1.8  | 7.5  |
| 6256 AT1G74920.1   Symbol: ALDH10A8   betaine-aldehyde dehydrogenase, putative, identical to betaine-aldehyde dehydrogenase, chloroplast precursor (BADH) (Arabidopsis thaliana) SWISS-PROT:Q9S795; strong similarity to betaine aldehyde dehydrogenase (Amaranthus hypochondriacus) GI:2388710   chr1:28142686-28146405 REVERSE   Aliases: F25A4.11, F25A4_11                                                                                                                                         | 10.9 | 9.5  | 1.4  | 3.9  |
| 4868 AT4G13520.1   expressed protein   chr4:7864390-7864920 FORWARD   Aliases: T6G15.70, T6G15_70                                                                                                                                                                                                                                                                                                                                                                                                      | 10.9 | 9.8  | 1.1  | 4.6  |
| 610 AT5G04850.1   SNF7 family protein, contains Pfam domain, PF03357: SNF7 family   chr5:1408063-1409893 REVERSE   Aliases: MUK11.17, MUK11_17                                                                                                                                                                                                                                                                                                                                                         | 10.9 | 7.8  | 3.1  | 11.2 |

|                                                                                                                                                                                                                                                                                                                                                                                                                       |      |      |      |      |
|-----------------------------------------------------------------------------------------------------------------------------------------------------------------------------------------------------------------------------------------------------------------------------------------------------------------------------------------------------------------------------------------------------------------------|------|------|------|------|
| 36 AT5G56640.1   Symbol: MIOX5   expressed protein, similar to myo-inositol oxygenase (Sus scrofa) gi:17432544:gb:AAL39076   chr5:22944555-22946869 REVERSE   Aliases: MIK19.9, MIK19_9                                                                                                                                                                                                                               | 10.9 | 2.1  | 8.8  | 27.6 |
| 2518 AT1G67250.1   proteasome maturation factor UMP1 family protein, contains Pfam profile PF05348: Proteasome maturation factor UMP1   chr1:25167305-25168715 REVERSE   Aliases: F1N21.7                                                                                                                                                                                                                             | 10.9 | 8.8  | 2.1  | 6.7  |
| 8366 ATCG00550.1   Symbol: PSBJ   PSII component   chrC:63538-63660 REVERSE   Aliases: PSBJ                                                                                                                                                                                                                                                                                                                           | 10.9 | 10.3 | 0.6  | 3.0  |
| 12958 AT5G60360.2   Symbol: AALP   similar to cysteine proteinase, putative [Arabidopsis thaliana] (TAIR:At3g45310.1); similar to cysteine protease [Nicotiana tabacum] (GB:BAA96501.1); contains InterPro domain Papain cysteine protease (C1) (InterPro:IPR000668); contains InterPro domain Eukaryotic thiol (cysteine) protease (InterPro:IPR000169)   chr5:24297123-24299623 FORWARD   Aliases: MUF9.4, MUF9_4   | 10.9 | 11.8 | -0.8 | -1.6 |
| 8524 AT1G27350.1   expressed protein, contains 1 transmembrane domain; similar to ribosome associated membrane protein RAMP4 GI:4585827 (Rattus norvegicus); similar to ESTs gb:T20610 and gb:AA586199   chr1:9498138-9499412 REVERSE   Aliases: F17L21.31                                                                                                                                                            | 10.9 | 10.4 | 0.6  | 2.9  |
| 8523 AT1G27330.1   expressed protein, similar to EST gb:AA650671 and gb:T20610   chr1:9492965-9494051 FORWARD   Aliases: F17L21.12, F17L21_12                                                                                                                                                                                                                                                                         | 10.9 | 10.4 | 0.6  | 2.9  |
| 106 AT2G28900.1   mitochondrial import inner membrane translocase subunit Tim17/Tim22/Tim23 family protein, contains Pfam PF02466: Mitochondrial import inner membrane translocase subunit Tim17   chr2:12421191-12422655 REVERSE   Aliases: F8N16.19, F8N16_19                                                                                                                                                       | 10.9 | 5.5  | 5.4  | 20.4 |
| 4297 AT3G56310.2   alpha-galactosidase, putative / melibiase, putative / alpha-D-galactoside galactohydrolase, putative, similar to alpha-galactosidase SP:Q42656 from (Coffea arabica)   chr3:20893806-20897302 FORWARD   Aliases: F18O21.270                                                                                                                                                                        | 10.9 | 11.9 | -1.0 | -5.0 |
| 7380 AT3G15660.2   similar to thioredoxin family protein [Arabidopsis thaliana] (TAIR:At4g04950.1); similar to glutaredoxin-related protein -like [Oryza sativa (japonica cultivar-group)] (GB:XP_550301.1); contains InterPro domain Glutaredoxin (InterPro:IPR002109); contains InterPro domain Glutaredoxin-related protein (InterPro:IPR004480)                                                                   | 10.9 | 9.0  | 1.9  | 3.4  |
| 4010 AT3G54110.1   Symbol: ATPUMP1   plant uncoupling mitochondrial protein (PUMP), identical to plant uncoupling mitochondrial protein (Arabidopsis thaliana) GI:3115108   chr3:20049670-20052179 FORWARD   Aliases: F24B22.70, PUMP, UCP, UCP2, UNCOUPLING PROTEIN, UNCOUPLING PROTEIN PUMP2                                                                                                                        | 10.9 | 8.6  | 2.3  | 5.3  |
| 856 AT4G33640.1   expressed protein   chr4:16159551-16160306 REVERSE   Aliases: T16L1.130, T16L1_130                                                                                                                                                                                                                                                                                                                  | 10.9 | 9.8  | 1.1  | 10.1 |
| 20294 AT4G19640.1   Symbol: ARA7   Ras-related GTP-binding protein, putative, similar to GTP-binding protein RAB5A GI:1370178 from (Lotus japonicus)   chr4:10687258-10689621 REVERSE   Aliases: F24J7.190, F24J7_190                                                                                                                                                                                                 | 10.9 | 10.8 | 0.1  | 0.2  |
| 9895 ATCG01020.1   Symbol: RPL32   encodes a chloroplast ribosomal protein L32, a constituent of the large subunit of the ribosomal complex   chrC:113449-113607 FORWARD   Aliases: RPL32                                                                                                                                                                                                                             | 10.9 | 9.3  | 1.6  | 2.4  |
| 777 AT1G59900.1   Symbol: AT E1 ALPHA   pyruvate dehydrogenase E1 component alpha subunit, mitochondrial (PDHE1-A), identical to SP:P52901 Pyruvate dehydrogenase E1 component alpha subunit, mitochondrial precursor (EC 1.2.4.1) (PDHE1-A) {Arabidopsis thaliana}   chr1:22054960-22057550 FORWARD   Aliases: PYRUVATE DEHYDROGENASE E1 ALPHA SUBUNIT                                                               | 10.9 | 8.9  | 2.0  | 10.4 |
| 446 AT2G30000.1   expressed protein, contains Pfam domain PF03660: Uncharacterised protein family (UPF0123)   chr2:12810932-12812054 REVERSE   Aliases: F23F1.8, F23F1_8                                                                                                                                                                                                                                              | 10.9 | 8.8  | 2.1  | 12.4 |
| 2474 AT1G80600.1   acetylmethyltransferase, mitochondrial, putative / acetylmethyltransferase, putative / AOTA, putative / ACOAT, putative, similar to SP:O04866 Acetylmethyltransferase, mitochondrial precursor (EC 2.6.1.11) (ACOAT) (Acetylmethyltransferase) (AOTA) {Alnus glutinosa}; contains Pfam profile PF00202: aminotransferase, class III   chr1:30303410-30305445 REVERSE   Aliases: T21F11.7, T21F11_7 | 10.9 | 7.6  | 3.2  | 6.7  |
| 4818 AT1G26270.1   phosphatidylinositol 3- and 4-kinase family protein, similar to phosphatidylinositol 4-kinase type-II beta (Homo sapiens) GI:20159767; contains Pfam profile PF00454: Phosphatidylinositol 3- and 4-kinase   chr1:9089511-9092444 REVERSE   Aliases: F28B23.7, F28B23_7                                                                                                                            | 10.9 | 8.2  | 2.6  | 4.7  |
| 945 AT5G16450.2   dimethylmenaquinone methyltransferase family protein, similar to bacterial S-adenosylmethionine:2-demethylmenaquinone methyltransferases; contains Pfam profile PF03737: Dimethylmenaquinone methyltransferase   chr5:5374062-5375462 FORWARD   Aliases: MQK4.18, MQK4_18                                                                                                                           | 10.9 | 8.2  | 2.7  | 9.7  |
| 15023 AT3G57450.1   expressed protein   chr3:21272911-21273599 FORWARD   Aliases: T8H10.50                                                                                                                                                                                                                                                                                                                            | 10.9 | 10.5 | 0.3  | 1.2  |
| 6523 AT3G04400.1   Symbol: EMB2171   60S ribosomal protein L23 (RPL23C), similar to ribosomal protein L17 GB:AAA34113.1 from (Nicotiana tabacum)   chr3:1167282-1168663 FORWARD   Aliases: EMB2171, EMBRYO DEFECTIVE 2171, T27C4.4, T27C4_4                                                                                                                                                                           | 10.9 | 10.1 | 0.8  | 3.8  |
| 243 AT2G43780.1   expressed protein   chr2:18143521-18143724 REVERSE   Aliases: F18O19.11                                                                                                                                                                                                                                                                                                                             | 10.9 | 8.6  | 2.2  | 15.5 |



|                                                                                                                                                                                                                                                                                                                                                                                                                                                                                                                                                                                                                                                                                                                                                                                                                                                                                                                                                                                                                                                                                                                                                                                                                            |      |      |      |      |
|----------------------------------------------------------------------------------------------------------------------------------------------------------------------------------------------------------------------------------------------------------------------------------------------------------------------------------------------------------------------------------------------------------------------------------------------------------------------------------------------------------------------------------------------------------------------------------------------------------------------------------------------------------------------------------------------------------------------------------------------------------------------------------------------------------------------------------------------------------------------------------------------------------------------------------------------------------------------------------------------------------------------------------------------------------------------------------------------------------------------------------------------------------------------------------------------------------------------------|------|------|------|------|
| 1802 AT3G53580.1   diaminopimelate epimerase family protein, contains Pfam profile PF01678: Diaminopimelate epimerase   chr3:19875742-19878112 FORWARD   Aliases: F4P12.280                                                                                                                                                                                                                                                                                                                                                                                                                                                                                                                                                                                                                                                                                                                                                                                                                                                                                                                                                                                                                                                | 10.9 | 9.5  | 1.3  | 7.7  |
| 17180 AT5G13420.1   transaldolase, putative, similar to transaldolase (Solanum tuberosum) gi:2078350:gb:AAB54016   chr5:4301795-4304315 REVERSE   Aliases: T22N19.70, T22N19_70                                                                                                                                                                                                                                                                                                                                                                                                                                                                                                                                                                                                                                                                                                                                                                                                                                                                                                                                                                                                                                            | 10.9 | 11.1 | -0.3 | -0.7 |
| 655 AT2G39460.1   Symbol: ATRPL23A   60S ribosomal protein L23A (RPL23aA), identical to GB:AF034694   chr2:16482001-16483163 FORWARD   Aliases: F12L6.12, F12L6_12, RIBOSOMAL PROTEIN L23A, RPL23A                                                                                                                                                                                                                                                                                                                                                                                                                                                                                                                                                                                                                                                                                                                                                                                                                                                                                                                                                                                                                         | 10.9 | 6.8  | 4.0  | 11.0 |
| 9013 ATCG00440.1   Symbol: NDHC   Encodes NADH dehydrogenase D3 subunit of the chloroplast NAD(P)H dehydrogenase complex   chrC:50001-50363 REVERSE   Aliases: NDHC                                                                                                                                                                                                                                                                                                                                                                                                                                                                                                                                                                                                                                                                                                                                                                                                                                                                                                                                                                                                                                                        | 10.9 | 9.9  | 1.0  | 2.7  |
| 12980 NA                                                                                                                                                                                                                                                                                                                                                                                                                                                                                                                                                                                                                                                                                                                                                                                                                                                                                                                                                                                                                                                                                                                                                                                                                   | 10.9 | 11.2 | -0.4 | -1.6 |
| 195 AT5G51940.1   DNA-directed RNA polymerase II, putative, similar to SP:O88828 DNA-directed RNA polymerase II 14.4 kDa polypeptide (EC 2.7.7.6) (RPB6) (RPB14.4) {Rattus norvegicus}; contains Pfam profile PF01192: RNA polymerases K / 14 to 18 kDa subunit   chr5:21121813-21123157 FORWARD   Aliases: MSG15.2, MSG15_2                                                                                                                                                                                                                                                                                                                                                                                                                                                                                                                                                                                                                                                                                                                                                                                                                                                                                               | 10.8 | 9.2  | 1.7  | 16.7 |
| 950 AT3G48560.1   Symbol: CSR1   acetolactate synthase, chloroplast / acetohydroxy-acid synthase (ALS), nearly identical to SP:P17597 Acetolactate synthase, chloroplast precursor (EC 2.2.1.6, formerly EC 4.1.3.18) (Acetohydroxy-acid synthase) (ALS) {Arabidopsis thaliana}   chr3:18012297-18014566 REVERSE   Aliases: ACETOHYDROXY ACID SYNTHASE, ACETOLACTATE SYNTHASE, ACETOLACTATE SYNTHASE DEFICIENT, AHAS, ALS, CHLORSULFURON/IMIDAZOLINONE RESISTANT 1, IMIDAZOLE RESISTANT 1, IMR1, T8P19.70, TZP5                                                                                                                                                                                                                                                                                                                                                                                                                                                                                                                                                                                                                                                                                                            | 10.8 | 8.5  | 2.3  | 9.7  |
| 19624 AT4G39260.4   Symbol: ATGRP8                                                                                                                                                                                                                                                                                                                                                                                                                                                                                                                                                                                                                                                                                                                                                                                                                                                                                                                                                                                                                                                                                                                                                                                         | 10.8 | 11.0 | -0.2 | -0.3 |
| 10640 AT3G24170.2   similar to glutathione reductase, chloroplast [Arabidopsis thaliana] (TAIR:At3g54660.1); similar to glutathione reductase [Mesembryanthemum crystallinum] (GB:CAC13956.1); similar to glutathione-disulfide reductase (EC 1.8.1.7) - turnip (GB:T14394); similar to glutathione reductase [Pisum sativum] (GB:CAA66924.1); similar to Glutathione Reductase precursor [Spinacia oleracea] (GB:BAA07108.1); similar to glutathione reductase [Brassica oleracea] (GB:BAD14936.1); contains InterPro domain Pyridine nucleotide-disulphide oxidoreductase dimerisation domain (InterPro:IPR004099); contains InterPro domain Glutathione reductase, plant (InterPro:IPR006324); contains InterPro domain Mercuric reductase (InterPro:IPR000815); contains InterPro domain Pyridine nucleotide-disulphide oxidoreductase, class I (InterPro:IPR001100); contains InterPro domain FAD-dependent pyridine nucleotide-disulphide oxidoreductase (InterPro:IPR001327); contains InterPro domain Trypanothione reductase (InterPro:IPR001864); contains InterPro domain Pyridine nucleotide-disulphide oxidoreductase, class-II (InterPro:IPR000103)   chr3:8729517-8734548 REVERSE   Aliases: MUJ8.3, MUJ8_3 | 10.8 | 9.8  | 1.0  | 2.2  |
| 948 AT3G12390.1   nascent polypeptide associated complex alpha chain protein, putative / alpha-NAC, putative, similar to alpha-NAC, non-muscle form (Mus musculus) GI:1666690; contains Pfam profiles PF01849: NAC domain, PF00627: UBA/TS-N domain   chr3:3942266-3943789 FORWARD   Aliases: T2E22.29                                                                                                                                                                                                                                                                                                                                                                                                                                                                                                                                                                                                                                                                                                                                                                                                                                                                                                                     | 10.8 | 9.2  | 1.7  | 9.7  |
| 2725 AT1G56450.1   Symbol: PBG1   20S proteasome beta subunit G1 (PBG1) (PRCH), identical to 20S proteasome beta subunit (PBG1) GI:3421123 (Arabidopsis thaliana); identical to cDNA proteasome subunit prch GI:2511597   chr1:21145558-21148065 FORWARD   Aliases: F13N6.3, F13N6_3, PROTEASOME BETA SUBUNIT PBG1                                                                                                                                                                                                                                                                                                                                                                                                                                                                                                                                                                                                                                                                                                                                                                                                                                                                                                         | 10.8 | 8.0  | 2.8  | 6.4  |
| 7014 AT2G21290.1   expressed protein   chr2:9119937-9120411 FORWARD   Aliases: F3K23.5, F3K23_5                                                                                                                                                                                                                                                                                                                                                                                                                                                                                                                                                                                                                                                                                                                                                                                                                                                                                                                                                                                                                                                                                                                            | 10.8 | 10.1 | 0.7  | 3.5  |
| 11370 AT3G45980.1   histone H2B, identical to histone H2B Arabidopsis thaliana GI:2407802; contains Pfam profile PF00125 Core histone H2A/H2B/H3/H4   chr3:16907801-16908998 REVERSE   Aliases: F16L2.190                                                                                                                                                                                                                                                                                                                                                                                                                                                                                                                                                                                                                                                                                                                                                                                                                                                                                                                                                                                                                  | 10.8 | 10.3 | 0.6  | 2.0  |
| 2655 AT2G21580.2   similar to 40S ribosomal protein S25 (RPS25E) [Arabidopsis thaliana] (TAIR:At4g39200.1); similar to PREDICTED P0562A06.14 gene product [Oryza sativa (japonica cultivar-group)] (GB:XP_507607.1); contains InterPro domain S25 ribosomal protein (InterPro:IPR004977)   chr2:9243633-9244891 FORWARD   Aliases: F2G1.15, F2G1_15                                                                                                                                                                                                                                                                                                                                                                                                                                                                                                                                                                                                                                                                                                                                                                                                                                                                        | 10.8 | 8.3  | 2.6  | 6.5  |
| 18881 AT1G32460.1   expressed protein   chr1:11738190-11739306 FORWARD   Aliases: F5D14.24, F5D14_24                                                                                                                                                                                                                                                                                                                                                                                                                                                                                                                                                                                                                                                                                                                                                                                                                                                                                                                                                                                                                                                                                                                       | 10.8 | 10.9 | -0.1 | -0.4 |
| 6216 AT3G62790.1   NADH-ubiquinone oxidoreductase-related, contains weak similarity to NADH-ubiquinone oxidoreductase 15 kDa subunit (EC 1.6.5.3) (EC 1.6.99.3) (Complex I-15 kDa) (CI-15 kDa) (Swiss-Prot:O43920) (Homo sapiens)   chr3:23234059-23235283 REVERSE   Aliases: F26K9.220                                                                                                                                                                                                                                                                                                                                                                                                                                                                                                                                                                                                                                                                                                                                                                                                                                                                                                                                    | 10.8 | 10.3 | 0.5  | 3.9  |
| 10206 AT1G76180.1   Symbol: ERD14   dehydrin (ERD14), identical to SP:P42763 Dehydrin ERD14 {Arabidopsis thaliana}   chr1:28591667-28592771 REVERSE   Aliases: EARLY RESPONSE TO DEHYDRATION 14, ERD14, T23E18.12, T23E18_12                                                                                                                                                                                                                                                                                                                                                                                                                                                                                                                                                                                                                                                                                                                                                                                                                                                                                                                                                                                               | 10.8 | 11.7 | -0.9 | -2.3 |
| 6765 AT1G01090.1   Symbol: PDH E1 ALPHA   pyruvate dehydrogenase E1 component alpha subunit, chloroplast, identical to pyruvate dehydrogenase E1 alpha subunit GB:AAB86803 GI:2454182 from (Arabidopsis thaliana); identical to cDNA pyruvate dehydrogenase E1 alpha subunit mRNA, nuclear gene encoding plastid protein GI:2454181   chr1:47485-49279 REVERSE   Aliases: PYRUVATE DEHYDROGENASE E1 ALPHA, T25K16.8, T25K16_8                                                                                                                                                                                                                                                                                                                                                                                                                                                                                                                                                                                                                                                                                                                                                                                              | 10.8 | 9.5  | 1.4  | 3.6  |



|                                                                                                                                                                                                                                                                                                                                                                                                                                                                                                                                                                                                                                                                                                                                                                                                                                                                                                                                          |      |      |     |      |
|------------------------------------------------------------------------------------------------------------------------------------------------------------------------------------------------------------------------------------------------------------------------------------------------------------------------------------------------------------------------------------------------------------------------------------------------------------------------------------------------------------------------------------------------------------------------------------------------------------------------------------------------------------------------------------------------------------------------------------------------------------------------------------------------------------------------------------------------------------------------------------------------------------------------------------------|------|------|-----|------|
| 7982 AT2G14170.1   Symbol: ALDH6B2   methylmalonate-semialdehyde dehydrogenase, putative, similar to methylmalonate-semialdehyde dehydrogenase (acylating), mitochondrial precursor (MMSDH) (Rattus norvegicus) SWISS-PROT:Q02253   chr2:5984438-5988981 REVERSE   Aliases: T22C12.10, T22C12_10                                                                                                                                                                                                                                                                                                                                                                                                                                                                                                                                                                                                                                         | 10.8 | 10.4 | 0.4 | 3.1  |
| 8521 AT5G66120.2   3-dehydroquinase synthase, putative, similar to aroB (Neisseria gonorrhoeae)(GI:2661441); contains 3-dehydroquinase synthase domain PF01761   chr5:26448602-26451004 REVERSE   Aliases: K2A18.20, K2A18_20                                                                                                                                                                                                                                                                                                                                                                                                                                                                                                                                                                                                                                                                                                            | 10.8 | 9.3  | 1.5 | 2.9  |
| 1109 AT2G39390.1   60S ribosomal protein L35 (RPL35B)   chr2:16457738-16458956 REVERSE   Aliases: F12L6.5, F12L6_5                                                                                                                                                                                                                                                                                                                                                                                                                                                                                                                                                                                                                                                                                                                                                                                                                       | 10.8 | 8.9  | 1.9 | 9.2  |
| 1694 AT4G19120.2   early-responsive to dehydration stress protein (ERD3), identical to ERD3 protein (Arabidopsis thaliana) GI:15320410; contains Pfam profile PF03141: Putative methyltransferase; identical to cDNA ERD3 GI:15320409   chr4:10460306-10463113 REVERSE   Aliases: T18B16.90, T18B16_90                                                                                                                                                                                                                                                                                                                                                                                                                                                                                                                                                                                                                                   | 10.8 | 9.0  | 1.8 | 7.9  |
| 4252 AT4G31985.1   60S ribosomal protein L39 (RPL39C)   chr4:15469901-15470565 FORWARD   Aliases: None                                                                                                                                                                                                                                                                                                                                                                                                                                                                                                                                                                                                                                                                                                                                                                                                                                   | 10.8 | 8.9  | 1.9 | 5.1  |
| 8308 AT5G52840.1   NADH-ubiquinone oxidoreductase-related, contains weak similarity to NADH-ubiquinone oxidoreductase 13 kDa-B subunit (EC 1.6.5.3) (EC 1.6.99.3) (Complex I-13Kd-B) (CI-13Kd-B) (Complex I subunit B13) (Swiss-Prot:Q63362) (Rattus norvegicus)   chr5:21430880-21432232 FORWARD   Aliases: MXC20.6, MXC20_6                                                                                                                                                                                                                                                                                                                                                                                                                                                                                                                                                                                                            | 10.8 | 9.9  | 0.9 | 3.0  |
| 1187 AT2G40765.1   expressed protein   chr2:17019276-17020403 FORWARD   Aliases: None                                                                                                                                                                                                                                                                                                                                                                                                                                                                                                                                                                                                                                                                                                                                                                                                                                                    | 10.8 | 9.1  | 1.7 | 9.0  |
| 13642 AT2G24200.1   cytosol aminopeptidase, identical to cytosol aminopeptidase SP:P30184 from (Arabidopsis thaliana); contains Pfam profiles: PF00883 cytosol aminopeptidase family catalytic domain, PF02789: cytosol aminopeptidase family N-terminal domain   chr2:10293889-10296635 REVERSE   Aliases: F27D4.11, F27D4_11                                                                                                                                                                                                                                                                                                                                                                                                                                                                                                                                                                                                           | 10.8 | 10.2 | 0.6 | 1.4  |
| 3912 AT1G48630.1   guanine nucleotide-binding family protein / activated protein kinase C receptor, putative / RACK, putative, contains 7 WD-40 repeats (PF00400); very similar to guanine nucleotide-binding protein; activated protein kinase C receptor; RACK1 (GI:9294068) {Arabidopsis thaliana}; similar to WD-40 repeat auxin-dependent protein ARCA (SP:O24456) (Arabidopsis thaliana);   chr1:17985448-17986995 REVERSE   Aliases: F11I4.18, F11I4_18                                                                                                                                                                                                                                                                                                                                                                                                                                                                           | 10.8 | 8.9  | 1.9 | 5.3  |
| 4555 AT1G30630.1   coatomer protein epsilon subunit family protein / COPE family protein, similar to SP:O14579 Coatomer epsilon subunit (Epsilon-coat protein) (Epsilon-COP) from Homo sapiens, SP:Q60445 from Cricetulus griseus; ESTs gb:Z17908, gb:AA728673, gb:N96555, gb:H76335, gb:AA712463, gb:W43247, gb:T45611, gb:T21160, gb:T14119 and AI100483 come from this gene   chr1:10858296-10860243 REVERSE   Aliases: T5I8.8, T5I8_8                                                                                                                                                                                                                                                                                                                                                                                                                                                                                                | 10.8 | 8.8  | 2.0 | 4.8  |
| 1968 AT2G31200.1   Symbol: ADF6   actin-depolymerizing factor 6 (ADF6), identical to SP:Q9ZSK2 Actin-depolymerizing factor 6 (ADF-6) (AtADF6) {Arabidopsis thaliana}   chr2:13301130-13302487 FORWARD   Aliases: ACTIN DEPOLYMERIZING FACTOR 6, F16D14.4, F16D14_4                                                                                                                                                                                                                                                                                                                                                                                                                                                                                                                                                                                                                                                                       | 10.8 | 7.9  | 2.9 | 7.5  |
| 9483 AT2G01720.1   ribophorin I family protein, similar to SP:P04843 Dolichyl-diphosphooligosaccharide--protein glycosyltransferase 67 kDa subunit precursor (EC 2.4.1.119) (Ribophorin I) {Homo sapiens}; contains Pfam profile PF04597: Ribophorin I   chr2:317032-320249 REVERSE   Aliases: T8O11.11, T8O11_11                                                                                                                                                                                                                                                                                                                                                                                                                                                                                                                                                                                                                        | 10.8 | 10.2 | 0.6 | 2.5  |
| 3216 AT1G15120.1   ubiquinol-cytochrome C reductase complex 7.8 kDa protein, putative / mitochondrial hinge protein, putative, similar to SP:P48504 Ubiquinol-cytochrome C reductase complex 7.8 kDa protein (EC 1.10.2.2) (Mitochondrial hinge protein) (CR7) {Solanum tuberosum}; contains Pfam profile PF02320: Ubiquinol-cytochrome C reductase hinge protein   chr1:5202849-5204188 FORWARD   Aliases: F9L1.5, F9L1_5                                                                                                                                                                                                                                                                                                                                                                                                                                                                                                               | 10.8 | 9.6  | 1.2 | 5.9  |
| 2798 AT5G38650.1   proteasome maturation factor UMP1 family protein, contains Pfam profile PF05348: Proteasome maturation factor UMP1   chr5:15488192-15490025 REVERSE   Aliases: MBB18.20, MBB18_20                                                                                                                                                                                                                                                                                                                                                                                                                                                                                                                                                                                                                                                                                                                                     | 10.8 | 8.7  | 2.1 | 6.4  |
| 1550 AT5G05730.1   Symbol: ASA1   anthranilate synthase, alpha subunit, component I-1 (ASA1), identical to SP:P32068   chr5:1719574-1722904 REVERSE   Aliases: A METHYL TRYPTOPHAN RESISTANT 1, AMT1, ANTHRANILATE SYNTHASE ALPHA SUBUNIT, ANTHRANILATE SYNTHASE ALPHA SUBUNIT 1, MJJ3.14, MJJ3_14, TRP5, TRYPTOPHAN BIOSYNTHESIS 5, WEI2                                                                                                                                                                                                                                                                                                                                                                                                                                                                                                                                                                                                | 10.8 | 9.5  | 1.2 | 8.1  |
| 12879 AT1G48900.1   signal recognition particle 54 kDa protein 3 / SRP54 (SRP-54C), identical to SP:P49967 Signal recognition particle 54 kDa protein 3 (SRP54) {Arabidopsis thaliana}   chr1:18088450-18091547 REVERSE   Aliases: F27K7.8, F27K7_8                                                                                                                                                                                                                                                                                                                                                                                                                                                                                                                                                                                                                                                                                      | 10.8 | 10.1 | 0.7 | 1.6  |
| 935 AT5G61170.1   40S ribosomal protein S19 (RPS19C), 40S ribosomal protein S19, Oryza sativa, SWISSPROT:RS19_ORYSA                                                                                                                                                                                                                                                                                                                                                                                                                                                                                                                                                                                                                                                                                                                                                                                                                      | 10.8 | 8.1  | 2.7 | 9.7  |
| 4454 AT5G35360.2   Symbol: CAC2   similar to methylcrotonyl-CoA carboxylase alpha chain, mitochondrial / 3-methylcrotonyl-CoA carboxylase 1 (MCCA) [Arabidopsis thaliana] (TAIR:At1g03090.2); similar to biotin carboxylase precursor [Glycine max] (GB:AAC23573.1); similar to biotin carboxylase precursor [Glycine max] (GB:AAC02267.1); similar to acetyl-CoA carboxylase [Glycine max] (GB:AAF80469.1); similar to biotin carboxylase subunit (GB:AAC41659.1); contains InterPro domain Carbamoyl-phosphate synthetase large chain, N-terminal (InterPro:IPR005481); contains InterPro domain Acetyl-CoA carboxylase, biotin carboxylase (InterPro:IPR004549); contains InterPro domain Biotin carboxylase, C-terminal (InterPro:IPR005482); contains InterPro domain Carbamoyl-phosphate synthase L chain, ATP-binding (InterPro:IPR005479)   chr5:13601388-13606337 FORWARD   Aliases: ACETYL COA CARBOXYLASE, T26D22.8, T26D22_8 | 10.8 | 9.7  | 1.0 | 4.9  |
| 551 AT3G51030.1   Symbol: ATTRX1                                                                                                                                                                                                                                                                                                                                                                                                                                                                                                                                                                                                                                                                                                                                                                                                                                                                                                         | 10.8 | 5.2  | 5.6 | 11.6 |

|                                                                                                                                                                                                                                                                                                                                                                                                                                                                                                        |      |      |      |      |
|--------------------------------------------------------------------------------------------------------------------------------------------------------------------------------------------------------------------------------------------------------------------------------------------------------------------------------------------------------------------------------------------------------------------------------------------------------------------------------------------------------|------|------|------|------|
| 10467 AT1G61780.1   postsynaptic protein-related, similar to postsynaptic protein CRIPT GI:3098551 from ( <i>Rattus norvegicus</i> )   chr1:22816280-22817806 REVERSE   Aliases: T13M11.14, T13M11_14                                                                                                                                                                                                                                                                                                  | 10.8 | 10.4 | 0.4  | 2.2  |
| 7976 AT2G22670.2   Symbol: IAA8   auxin-responsive protein / indoleacetic acid-induced protein 8 (IAA8), identical to SP:Q38826 Auxin-responsive protein IAA8 (Indoleacetic acid-induced protein 8) { <i>Arabidopsis thaliana</i> }                                                                                                                                                                                                                                                                    | 10.8 | 9.9  | 0.8  | 3.1  |
| 5395 AT3G10090.1   40S ribosomal protein S28 (RPS28A), similar to ribosomal protein S28 GB:P34789 ( <i>Arabidopsis thaliana</i> )   chr3:3108815-3110022 REVERSE   Aliases: T22K18.8                                                                                                                                                                                                                                                                                                                   | 10.8 | 8.7  | 2.1  | 4.3  |
| 616 AT5G23250.1   succinyl-CoA ligase (GDP-forming) alpha-chain, mitochondrial, putative / succinyl-CoA synthetase, alpha chain, putative / SCS-alpha, putative, similar to SP:P36967 Succinyl-CoA ligase (GDP-forming) alpha-chain, mitochondrial precursor (EC 6.2.1.4) (Succinyl-CoA synthetase, alpha chain) (SCS-alpha) { <i>Dictyostelium discoideum</i> }; contains Pfam profiles PF00549: CoA-ligase, PF02629: CoA binding domain   chr5:7830392-7832846 FORWARD   Aliases: MKD15.11, MKD15_11 | 10.8 | 7.0  | 3.8  | 11.2 |
| 1638 AT5G27760.1   hypoxia-responsive family protein, contains Pfam profile: PF04588 hypoxia induced protein conserved region   chr5:9830368-9831787 FORWARD   Aliases: T1G16.90, T1G16_90                                                                                                                                                                                                                                                                                                             | 10.8 | 8.0  | 2.7  | 8.0  |
| 3415 AT2G13560.1   malate oxidoreductase, putative, similar to NAD-dependent malic enzyme 62 kDa isoform, mitochondrial precursor (EC 1.1.1.39) (NAD-ME) (SP:P37221) { <i>Solanum tuberosum</i> }   chr2:5657046-5662301 FORWARD   Aliases: T10F5.10, T10F5_10                                                                                                                                                                                                                                         | 10.7 | 9.6  | 1.2  | 5.7  |
| 1948 AT5G10360.1   Symbol: EMB3010   40S ribosomal protein S6 (RPS6B)   chr5:3258475-3260228 REVERSE   Aliases: EMB3010, EMBRYO DEFECTIVE 3010, F12B17.290, F12B17_290                                                                                                                                                                                                                                                                                                                                 | 10.7 | 9.2  | 1.5  | 7.5  |
| 6643 AT1G63770.2   peptidase M1 family protein, similar to SP:P04825 Aminopeptidase N (EC 3.4.11.2) (Alpha-aminoacylpeptide hydrolase) { <i>Escherichia coli</i> }; contains Pfam profile PF01433: Peptidase family M1   chr1:23661169-23667906 REVERSE   Aliases: F24D7.4, F24D7_4                                                                                                                                                                                                                    | 10.7 | 9.5  | 1.3  | 3.7  |
| 6269 AT3G57150.1   Symbol: NAP57   dyskerin, putative / nucleolar protein NAP57, putative, similar to SP:P40615 Dyskerin (Nucleolar protein NAP57) { <i>Rattus norvegicus</i> }; contains Pfam profiles PF01509: TruB family pseudouridylate synthase (N terminal domain), PF01472: PUA domain; supporting cDNA gi:8901185:gb:AF234984.2:AF234984   chr3:21164952-21166988 REVERSE   Aliases: ATNAP57, F24I3.230                                                                                       | 10.7 | 9.4  | 1.4  | 3.9  |
| 2503 AT5G26710.1   glutamate-tRNA ligase, putative / glutamyl-tRNA synthetase, putative / GluRS, putative, identical to gi:3435196   chr5:9305600-9308774 FORWARD   Aliases: None                                                                                                                                                                                                                                                                                                                      | 10.7 | 8.8  | 1.9  | 6.7  |
| 1403 AT5G64460.5   similar to phosphoglycerate/bisphosphoglycerate mutase family protein [ <i>Arabidopsis thaliana</i> ] (TAIR:At2g17280.1); similar to phosphoglycerate mutase-like protein [ <i>Glycine max</i> ] (GB:AAG38145.1)   chr5:25790075-25792761 REVERSE   Aliases: T12B11.5, T12B11_5                                                                                                                                                                                                     | 10.7 | 7.4  | 3.3  | 8.5  |
| 4692 AT5G19440.1   similar to <i>Eucalyptus gunnii</i> alcohol dehydrogenase of unknown physiological function (GI:1143445), apple tree, PIR:T16995; NOT a cinnamyl-alcohol dehydrogenase   chr5:6556422-6558344 FORWARD   Aliases: F7K24.190, F7K24_190                                                                                                                                                                                                                                               | 10.7 | 8.4  | 2.3  | 4.8  |
| 12068 AT1G74030.1   enolase, putative, similar to Swiss-Prot:P15007 enolase (EC 4.2.1.11) (2-phosphoglycerate dehydratase)(2-phospho-D- glycerate hydro-lyase) ( <i>Drosophila melanogaster</i> )   chr1:27842845-27845592 REVERSE   Aliases: F2P9.10, F2P9_10                                                                                                                                                                                                                                         | 10.7 | 9.9  | 0.8  | 1.8  |
| 10502 AT5G53120.3   Symbol: SPDS3   spermidine synthase, putative / putrescine aminopropyltransferase, putative, similar to SP:O82147 Spermidine synthase (EC 2.5.1.16) (Putrescine aminopropyltransferase) (SPDSY) { <i>Coffea arabica</i> }; contains Pfam profile PF01564: Spermine/spermidine synthase   chr5:21552058-21555474 FORWARD   Aliases: MFH8.5, MFH8_5, SPERMIDINE SYNTHASE 3, SPMS                                                                                                     | 10.7 | 10.1 | 0.6  | 2.2  |
| 4354 AT3G02080.1   40S ribosomal protein S19 (RPS19A), similar to 40S ribosomal protein S19 GB:P40978 ( <i>Oryza sativa</i> )   chr3:363918-365255 REVERSE   Aliases: F1C9.13, F1C9_13                                                                                                                                                                                                                                                                                                                 | 10.7 | 9.2  | 1.5  | 5.0  |
| 9709 AT5G58070.1   lipocalin, putative, similar to temperature stress-induced lipocalin ( <i>Triticum aestivum</i> ) GI:18650668   chr5:23517287-23518435 REVERSE   Aliases: K21L19.9, K21L19_9                                                                                                                                                                                                                                                                                                        | 10.7 | 9.1  | 1.6  | 2.5  |
| 433 AT3G01740.1   expressed protein   chr3:267836-268845 FORWARD   Aliases: F4P13.29                                                                                                                                                                                                                                                                                                                                                                                                                   | 10.7 | 7.7  | 3.0  | 12.5 |
| 2311 AT2G27530.2   60S ribosomal protein L10A (RPL10aB)   chr2:11770332-11771821 REVERSE   Aliases: F10A12.22                                                                                                                                                                                                                                                                                                                                                                                          | 10.7 | 8.3  | 2.4  | 7.0  |
| 6473 AT1G06640.2   2-oxoglutarate-dependent dioxygenase, putative, similar to 2A6 (GI:599622) and tomato ethylene synthesis regulatory protein E8 (SP:P10967); contains Pfam profile: PF00671 Iron/Ascorbate oxidoreductase family   chr1:2032344-2034013 FORWARD   Aliases: F12K11.27, F12K11_27                                                                                                                                                                                                      | 10.7 | 11.6 | -0.9 | -3.8 |
| 1674 AT1G03330.1   small nuclear ribonucleoprotein D, putative / snRNP core SM-like protein, putative / U6 snRNA-associated Sm-like protein, putative, similar to SWISS-PROT:Q9Y333 U6 snRNA-associated Sm-like protein LSm2 (Small nuclear ribonuclear protein D homolog, G7b, SnRNP core SM-like protein SM-x5) ( <i>Homo sapiens</i> )   chr1:817983-819563 REVERSE   Aliases: F15K9.7, F15K9_7                                                                                                     | 10.7 | 8.8  | 1.9  | 7.9  |

|       |             |                                                                                                                                                                                                                                                                                                                                                                                                                                                                          |      |      |      |      |
|-------|-------------|--------------------------------------------------------------------------------------------------------------------------------------------------------------------------------------------------------------------------------------------------------------------------------------------------------------------------------------------------------------------------------------------------------------------------------------------------------------------------|------|------|------|------|
| 12408 | AT5G11770.1 | NADH-ubiquinone oxidoreductase 20 kDa subunit, mitochondrial, identical to NADH-ubiquinone oxidoreductase 20 kDa subunit mitochondrial (precursor) SP:Q42577 from (Arabidopsis thaliana); contains Pfam profile: PF01058 NADH ubiquinone oxidoreductase, 20 Kd subunit   chr5:3790807-3793001 REVERSE   Aliases: T22P22.160, T22P22_160                                                                                                                                  | 10.7 | 9.5  | 1.2  | 1.7  |
| 4326  | AT1G70730.1 | phosphoglucomutase, cytoplasmic, putative / glucose phosphomutase, putative, strong similarity to SP:P93804 Phosphoglucomutase, cytoplasmic 1 (EC 5.4.2.2) (Glucose phosphomutase 1) (PGM 1) {Zea mays}; contains InterPro accession IPR006352: Phosphoglucosamine mutase   chr1:26672527-26676418 REVERSE   Aliases: F5A18.9, F5A18_9                                                                                                                                   | 10.7 | 8.5  | 2.2  | 5.0  |
| 4113  | AT4G29735.1 | expressed protein, contains Pfam domain PF05251: Uncharacterised protein family (UPF0197)   chr4:14562645-14564384 REVERSE   Aliases: None                                                                                                                                                                                                                                                                                                                               | 10.7 | 8.9  | 1.8  | 5.2  |
| 11395 | AT1G75950.1 | Symbol: SKP1   E3 ubiquitin ligase SCF complex subunit SKP1/ASK1 (At1), E3 ubiquitin ligase; skp1a; identical to Skp1a GI:3068807, Skp1p GI:1432083 and UIP1 GI:3719209 from (Arabidopsis thaliana); contains Pfam profiles PF01466: Skp1 family, dimerisation domain and PF03931: Skp1 family, tetramerisation domain;   chr1:28520258-28521360 FORWARD   Aliases: ARABIDOPSIS SKP1 HOMOLOGUE, ASK1, ATSKP1, SKP1A, T4O12.17, T4O12_17, UFO INTERACTING PROTEIN 1, UIP1 | 10.7 | 9.9  | 0.8  | 2.0  |
| 5166  | AT2G27020.1 | Symbol: PAG1   20S proteasome alpha subunit G (PAG1) (PRC8), identical to proteasome subunit alpha type 3 SP:O23715, GI:12644056 from (Arabidopsis thaliana); identical to cDNA proteasome subunit prc8 GI:2511591   chr2:11535437-11538054 REVERSE   Aliases: 20S PROTEASOME SUBUNIT PAG1, T20P8.7, T20P8_7                                                                                                                                                             | 10.7 | 7.8  | 2.9  | 4.5  |
| 9501  | AT3G16640.1 | Symbol: TCTP   translationally controlled tumor family protein, similar to translationally controlled tumor protein GB:AAD10032 from (Hevea brasiliensis)   chr3:5669379-5670823 REVERSE   Aliases: MGL6.19, TRANSLATIONALLY CONTROLLED TUMOR PROTEIN                                                                                                                                                                                                                    | 10.7 | 11.3 | -0.6 | -2.5 |
| 17748 | AT1G18880.1 | proton-dependent oligopeptide transport (POT) family protein, contains Pfam profile: PF00854 POT family   chr1:6520744-6523359 FORWARD   Aliases: F6A14.2, F6A14_2                                                                                                                                                                                                                                                                                                       | 10.7 | 10.4 | 0.3  | 0.6  |
| 13667 | AT3G06400.1 | DNA-dependent ATPase, putative, similar to DNA-dependent ATPase SNF2H (Mus musculus) GI:14028669; contains Pfam profiles PF00271: Helicase conserved C-terminal domain, PF00176: SNF2 family N-terminal domain, PF00249: Myb-like DNA-binding domain   chr3:1941007-1946930 FORWARD   Aliases: F24P17.13, F24P17_13                                                                                                                                                      | 10.7 | 10.9 | -0.3 | -1.4 |
| 1082  | AT5G61220.1 | complex 1 family protein / LVR family protein, contains Pfam PF05347: Complex 1 protein (LYR family)   chr5:24642802-24644149 REVERSE   Aliases: MAF19.16, MAF19_16                                                                                                                                                                                                                                                                                                      | 10.7 | 6.7  | 4.0  | 9.3  |
| 7955  | AT5G11670.1 | malate oxidoreductase, putative, similar to NADP-dependent malic enzyme (EC 1.1.1.40) (NADP-ME) (SP:P12628) {Phaseolus vulgaris}                                                                                                                                                                                                                                                                                                                                         | 10.7 | 11.4 | -0.7 | -3.1 |
| 19130 | AT4G38920.1 | vacuolar ATP synthase 16 kDa proteolipid subunit 3 / V-ATPase 16 kDa proteolipid subunit 3 (AVAP3) (AVA-P3), identical to SP:P59227 Vacuolar ATP synthase 16 kDa proteolipid subunit 1/3/5 (EC 3.6.3.14) (V-ATPase 16 kDa proteolipid subunit 1/3/5) {Arabidopsis thaliana}; contains Pfam profile PF00137: ATP synthase subunit C   chr4:18147205-18149261 FORWARD   Aliases: F19H22.20                                                                                 | 10.7 | 10.8 | -0.1 | -0.4 |
| 7516  | AT5G47890.1 | NADH-ubiquinone oxidoreductase B8 subunit, putative, similar to SP:O43678 NADH-ubiquinone oxidoreductase B8 subunit (EC 1.6.5.3) (EC 1.6.99.3) (Complex I-B8) (CI-B8) {Homo sapiens}; contains Pfam profile PF05047: Mitochondrial ribosomal protein L51 / S25 / CI-B8 domain   chr5:19405963-19407852 FORWARD   Aliases: MCA23.23, MCA23_23                                                                                                                             | 10.7 | 10.0 | 0.6  | 3.3  |
| 9714  | AT3G59920.1 | Symbol: ATGDI2                                                                                                                                                                                                                                                                                                                                                                                                                                                           | 10.7 | 9.6  | 1.0  | 2.5  |
| 4311  | AT5G58710.1 | Symbol: ROC7   peptidyl-prolyl cis-trans isomerase, putative / cyclophilin, putative / rotamase, putative (ROC7), similar to cyclophilin (Arabidopsis thaliana) gi:2443755:gb:AAB71401   chr5:23735018-23736975 FORWARD   Aliases: CYCLOPHILIN, MZN1.23, MZN1_23                                                                                                                                                                                                         | 10.7 | 9.1  | 1.5  | 5.0  |
| 920   | AT2G25210.1 | 60S ribosomal protein L39 (RPL39A)   chr2:10746934-10747631 FORWARD   Aliases: T22F11.20, T22F11_20                                                                                                                                                                                                                                                                                                                                                                      | 10.7 | 7.4  | 3.3  | 9.8  |
| 6925  | AT1G72370.2 | Symbol: P40   similar to 40S ribosomal protein SA (RPSaB) [Arabidopsis thaliana] (TAIR:At3g04770.2); similar to RSSA_DAUCA 40S ribosomal protein SA (p40) (GB:O80377); contains InterPro domain Ribosomal protein S2, eukaryotic and archaeal form (InterPro:IPR005707); contains InterPro domain Ribosomal protein S2 (InterPro:IPR001865)   chr1:27246607-27248589 REVERSE   Aliases: AP40, P40, RP40, RPSAA, T10D10.16, T10D10_16                                     | 10.7 | 8.8  | 1.9  | 3.6  |
| 11045 | AT3G52880.1 | monodehydroascorbate reductase, putative, monodehydroascorbate reductase (NADH), Lycopersicon esculentum, PIR:T06407   chr3:19612190-19615431 REVERSE   Aliases: F8J2.50                                                                                                                                                                                                                                                                                                 | 10.7 | 9.6  | 1.0  | 2.1  |
| 3883  | AT2G30970.1 | Symbol: ASP1   aspartate aminotransferase, mitochondrial / transaminase A (ASP1), identical to SP:P46643 Aspartate aminotransferase, mitochondrial precursor (EC 2.6.1.1) (Transaminase A) {Arabidopsis thaliana}   chr2:13185926-13188984 FORWARD   Aliases: ASPARTATE AMINOTRANSFERASE 1, F7F1.18, F7F1_18                                                                                                                                                             | 10.7 | 6.3  | 4.3  | 5.4  |
| 10505 | AT4G30010.1 | expressed protein   chr4:14672877-14673225 FORWARD   Aliases: F6G3.40, F6G3_40                                                                                                                                                                                                                                                                                                                                                                                           | 10.7 | 9.9  | 0.8  | 2.2  |
| 5939  | AT2G22425.1 | expressed protein, weak similarity to Swiss-Prot:Q9Y6A9 microsomal signal peptidase 12 kDa subunit (SPase 12 kDa subunit, SPC12, HSPC033) (Homo sapiens)                                                                                                                                                                                                                                                                                                                 | 10.7 | 10.2 | 0.5  | 4.1  |



|                                                                                                                                                                                                                                                                                                                                                                                                                           |      |      |      |      |
|---------------------------------------------------------------------------------------------------------------------------------------------------------------------------------------------------------------------------------------------------------------------------------------------------------------------------------------------------------------------------------------------------------------------------|------|------|------|------|
| 535 AT1G13690.1   Symbol: ATE1   RNA recognition motif (RRM)-containing protein, contains Pfam profile: PF00076 RNA recognition motif   chr1:4693286-4694404 FORWARD   Aliases: F21F23.13, F21F23_13, GRPE HOMOLOG                                                                                                                                                                                                        | 10.7 | 7.5  | 3.2  | 11.7 |
| 2532 AT4G11010.1   Symbol: NDPK3   nucleoside diphosphate kinase 3, mitochondrial (NDK3), identical to Nucleoside diphosphate kinase III, mitochondrial precursor (NDK III) (NDP kinase III) (NDPK III) (SP:O49203) (Arabidopsis thaliana); contains Pfam PF00334 : Nucleoside diphosphate kinase domain;                                                                                                                 | 10.7 | 8.5  | 2.2  | 6.6  |
| 4200 AT5G46020.1   expressed protein   chr5:18680104-18682054 REVERSE   Aliases: MCL19.6, MCL19_6                                                                                                                                                                                                                                                                                                                         | 10.6 | 9.4  | 1.2  | 5.1  |
| 1724 AT5G14800.1   Symbol: P5CR   pyrroline-5-carboxylate reductase, identical to pyrroline-5-carboxylate reductase SP:P54904 from (Arabidopsis thaliana)   chr5:4785965-4787840 REVERSE   Aliases: AT P5C1, AT P5R, PYRROLINE 5 CARBOXYLATE (P5C) REDUCTASE, T9L3.100, T9L3_100                                                                                                                                          | 10.6 | 8.2  | 2.4  | 7.8  |
| 3188 AT5G52310.1   Symbol: COR78   low-temperature-responsive protein 78 (LTI78) / desiccation-responsive protein 29A (RD29A)   chr5:21258075-21260839 FORWARD   Aliases: COLD REGULATED 78, K24M7.4, K24M7_4, LTI140, LTI78, RD29A, RESPONSIVE TO DESSICATION 29A                                                                                                                                                        | 10.6 | 12.7 | -2.0 | -5.9 |
| 8707 AT4G16240.1   expressed protein   chr4:9192351-9192583 REVERSE   Aliases: DL4160C, FCAALL.320                                                                                                                                                                                                                                                                                                                        | 10.6 | 9.8  | 0.9  | 2.8  |
| 12353 AT1G29150.1   Symbol: AT59   26S proteasome regulatory subunit, putative (RPN6), similar to 19S proteasome subunit 9 GB:AAC34120 GI:3450889 from (Arabidopsis thaliana)   chr1:10180505-10182689 FORWARD   Aliases: 19S PROTEASOME SUBUNIT 9, F28N24.15, F28N24_15, RPN6                                                                                                                                            | 10.6 | 9.8  | 0.8  | 1.7  |
| 4531 AT1G65290.1   acyl carrier family protein / ACP family protein, similar to SP:P53665 Acyl carrier protein, mitochondrial precursor (ACP) (NADH-ubiquinone oxidoreductase 9.6 kDa subunit) (MtACP-1) {Arabidopsis thaliana}; contains InterPro accession IPR003881: Isochorismatase   chr1:24252515-24254065 REVERSE   Aliases: T8F5.6, T8F5_6                                                                        | 10.6 | 9.1  | 1.5  | 4.9  |
| 6645 AT5G58290.1   Symbol: RPT3   26S proteasome AAA-ATPase subunit (RPT3), identical to 26S proteasome AAA-ATPase subunit RPT3 GI:6652882 from (Arabidopsis thaliana)   chr5:23586304-23588556 FORWARD   Aliases: 26S PROTEASOME AAA ATPASE SUBUNIT RPT3, MCK7.16, MCK7_16                                                                                                                                               | 10.6 | 8.7  | 2.0  | 3.7  |
| 9126 AT5G58740.1   nuclear movement family protein, contains Pfam profile: PF03593 nuclear movement protein                                                                                                                                                                                                                                                                                                               | 10.6 | 9.9  | 0.7  | 2.7  |
| 368 AT2G36620.1   60S ribosomal protein L24 (RPL24A)   chr2:15357486-15358944 REVERSE   Aliases: F13K3.2, F13K3_2                                                                                                                                                                                                                                                                                                         | 10.6 | 8.0  | 2.6  | 13.3 |
| 2117 AT1G33040.1   nascent polypeptide-associated complex (NAC) domain-containing protein, similar to alpha-NAC, non-muscle form (Mus musculus) GI:1666690; contains Pfam profile PF01849: NAC domain   chr1:11966479-11967823 FORWARD   Aliases: F9L11.19, F9L11_19                                                                                                                                                      | 10.6 | 7.1  | 3.5  | 7.2  |
| 20639 AT1G11650.2   Symbol: ATRBP45B   RNA-binding protein 45 (RBP45), putative, similar to gb:U90212 DNA binding protein ACBF from Nicotiana tabacum and contains 3 PF:00076 RNA recognition motif domains. ESTs gb:T44278, gb:R65195, gb:N65904, gb:H37499, gb:R90487, gb:N95952, gb:T44278, gb:Z20166, gb:N96891, gb:W43137, gb:F15504, gb:F1   chr1:3914774-3918163 FORWARD   Aliases: ATRBP45B, F25C20.21, F25C20_21 | 10.6 | 10.7 | -0.0 | -0.1 |
| 4968 AT5G54940.2   eukaryotic translation initiation factor SUI1, putative, similar to SP:P32911 Protein translation factor SUI1 {Saccharomyces cerevisiae}; contains Pfam profile PF01253: Translation initiation factor SUI1   chr5:22325497-22326633 REVERSE   Aliases: MBG8.21, MBG8_21                                                                                                                               | 10.6 | 11.3 | -0.7 | -4.6 |
| 5347 AT2G27450.2   Symbol: NLP1   carbon-nitrogen hydrolase family protein, low similarity to beta-alanine synthase (Drosophila melanogaster) GI:14334063; contains Pfam profile PF00795: hydrolase, carbon-nitrogen family   chr2:11744510-11746676 REVERSE   Aliases: ATNLP1, CPA, F10A12.13, F10A12_13, N CARBAMOYLPUTRESCINE AMIDOHYDROLASE, NITRILASE LIKE PROTEIN 1                                                 | 10.6 | 8.7  | 1.9  | 4.4  |
| 14866 AT1G48030.2   dihydrolipoamide dehydrogenase 1, mitochondrial / lipoamide dehydrogenase 1 (MTPD1), identical to GB:AAF34795 (gi:12704696) from (Arabidopsis thaliana)                                                                                                                                                                                                                                               | 10.6 | 10.1 | 0.5  | 1.2  |
| 508 AT2G30410.1   Symbol: KIS   tubulin folding cofactor A (KIESEL), identical to cDNA tubulin folding cofactor A, GI:20514256, SP:O04350 Tubulin-specific chaperone A (Tubulin-folding cofactor A) (CFA) (TCP1-chaperonin cofactor A homolog) {Arabidopsis thaliana}   chr2:12966403-12967845 FORWARD   Aliases: KIESEL, T9D9.22, T9D9_22                                                                                | 10.6 | 8.4  | 2.2  | 11.9 |
| 5532 AT1G12230.1   transaldolase, putative, similar to Swiss-Prot:P30148 transaldolase B (EC 2.2.1.2) (Escherichia coli O157:H7)   chr1:4148032-4151023 FORWARD   Aliases: T28K15.4, T28K15_4                                                                                                                                                                                                                             | 10.6 | 8.3  | 2.3  | 4.3  |
| 9755 AT4G40030.1   histone H3.2, identical to Histone H3.2, minor Lolium temulentum SP:P11105, nearly identical to histone H3.2 Mus pahari GI:515005; contains Pfam profile PF00125 Core histone H2A/H2B/H3/H4   chr4:18555571-18556964 REVERSE   Aliases: T5J17.200, T5J17_200                                                                                                                                           | 10.6 | 9.8  | 0.8  | 2.4  |
| 12556 AT4G29040.1   Symbol: RPT2A   26S proteasome AAA-ATPase subunit (RPT2a), almost identical to 26S proteasome AAA-ATPase subunit RPT2a (GI:6652880) {Arabidopsis thaliana}; Drosophila melanogaster 26S proteasome subunit 4 ATPase, PID:g1066065   chr4:14312309-14314568 FORWARD   Aliases: 26S PROTEASOME AAA ATPASE SUBUNIT RPT2A, F19B15.70, F19B15_70                                                           | 10.6 | 10.1 | 0.5  | 1.7  |



|                                                                                                                                                                                                                                                                                                                                                                                                                                                                                                                                                                                                     |      |      |      |      |
|-----------------------------------------------------------------------------------------------------------------------------------------------------------------------------------------------------------------------------------------------------------------------------------------------------------------------------------------------------------------------------------------------------------------------------------------------------------------------------------------------------------------------------------------------------------------------------------------------------|------|------|------|------|
| 2763 AT5G59910.1   histone H2B, nearly identical to histone H2B Arabidopsis thaliana GI:2407802; contains Pfam profile PF00125 Core histone H2A/H2B/H3/H4   chr5:24144354-24145161 FORWARD   Aliases: MMN10.15, MMN10_15                                                                                                                                                                                                                                                                                                                                                                            | 10.6 | 9.3  | 1.3  | 6.4  |
| 1041 AT4G14615.1   expressed protein   chr4:8383765-8385074 FORWARD   Aliases: None                                                                                                                                                                                                                                                                                                                                                                                                                                                                                                                 | 10.6 | 8.7  | 1.9  | 9.4  |
| 4236 AT4G34870.1   Symbol: ROC5   peptidyl-prolyl cis-trans isomerase / cyclophilin (CYP1) / rotamase, identical to cyclophilin (CYP1) gi:992643:gb:AAA75512; similar to peptidyl-prolyl cis-trans isomerase, PPIase (cyclophilin, cyclosporin A-binding protein) (Catharanthus roseus) SWISS-PROT:Q39613   chr4:16614332-16615318 FORWARD   Aliases: ATCYP1, CYCLOPHILIN, F11I11.110, F11I11_110, ROTAMASE CYP                                                                                                                                                                                     | 10.6 | 7.9  | 2.7  | 5.1  |
| 14615 AT1G11580.1   pectin methylesterase, putative, similar to pectin methylesterase GI:1617583 from (Lycopersicon esculentum)   chr1:3888690-3890811 FORWARD   Aliases: ATPMEPCRA, T23J18.24, T23J18_24                                                                                                                                                                                                                                                                                                                                                                                           | 10.6 | 9.7  | 0.9  | 1.2  |
| 13821 AT2G31570.1   Symbol: ATGPX2                                                                                                                                                                                                                                                                                                                                                                                                                                                                                                                                                                  | 10.6 | 11.1 | -0.5 | -1.4 |
| 14271 AT4G16330.1   oxidoreductase, 2OG-Fe(II) oxygenase family protein, similar to flavonone-3-hydroxylase (naringenin,2-oxoglutarate 3-dioxygenase) from Malus domestica (SP:Q06942), Pyrus communis (GI:20269881); contains Pfam domain PF03171, 2OG-Fe(II) oxygenase superfamily                                                                                                                                                                                                                                                                                                                | 10.6 | 10.3 | 0.3  | 1.3  |
| 8768 AT2G30490.1   Symbol: ATC4H   trans-cinnamate 4-monooxygenase / cinnamic acid 4-hydroxylase (C4H) (CA4H) / cytochrome P450 73 (CYP73) (CYP73A5), identical to SP:P92994: Trans-cinnamate 4-monooxygenase (EC 1.14.13.11) (Cinnamic acid 4-hydroxylase) (CA4H) (C4H) (P450C4H) (Cytochrome P450 73). {Arabidopsis thaliana}; molecular marker C4H (GB:U71080)   chr2:13000740-13002847 REVERSE   Aliases: C4H, CINNAMATE 4 HYDROXYLASE, CINNAMATE 4 HYDROXYLASE, CYP73A5, T6B20.16, T6B20_16                                                                                                    | 10.6 | 11.4 | -0.9 | -2.8 |
| 3376 AT4G02230.1   60S ribosomal protein L19 (RPL19C), similar to L19 from several species   chr4:979229-980667 REVERSE   Aliases: T2H3.3, T2H3_3                                                                                                                                                                                                                                                                                                                                                                                                                                                   | 10.6 | 8.3  | 2.3  | 5.7  |
| 7373 AT5G12470.1   expressed protein   chr5:4044625-4047439 REVERSE   Aliases: None                                                                                                                                                                                                                                                                                                                                                                                                                                                                                                                 | 10.6 | 9.6  | 1.0  | 3.4  |
| 15598 AT3G52220.1   expressed protein   chr3:19380340-19382033 REVERSE   Aliases: T25B15.5                                                                                                                                                                                                                                                                                                                                                                                                                                                                                                          | 10.6 | 10.3 | 0.3  | 1.0  |
| 4055 AT2G20860.1   Symbol: LIP1   lipoic acid synthase (LIP1), identical to gi:3928758 contains Pfam profile PF04055: radical SAM domain protein   chr2:8986660-8988286 FORWARD   Aliases: F5H14.17, F5H14_17, LIPOIC ACID SYNTHASE                                                                                                                                                                                                                                                                                                                                                                 | 10.6 | 8.3  | 2.3  | 5.2  |
| 497 AT3G09970.1   calcineurin-like phosphoesterase family protein, contains Pfam profile: PF00149 Calcineurin-like phosphoesterase                                                                                                                                                                                                                                                                                                                                                                                                                                                                  | 10.6 | 8.4  | 2.2  | 12.0 |
| 571 AT3G52580.1   40S ribosomal protein S14 (RPS14C), ribosomal protein S14 -Zea mays,PIR2:A30097   chr3:19514203-19515902 FORWARD   Aliases: F3C22.6                                                                                                                                                                                                                                                                                                                                                                                                                                               | 10.6 | 6.5  | 4.1  | 11.5 |
| 1503 AT2G43460.1   60S ribosomal protein L38 (RPL38A)   chr2:18053081-18054478 REVERSE   Aliases: T1O24.20                                                                                                                                                                                                                                                                                                                                                                                                                                                                                          | 10.6 | 8.5  | 2.1  | 8.2  |
| 227 AT5G41010.1   DNA-directed RNA polymerases I, II, and III 7 kDa subunit, putative, similar to SP:P53803 DNA-directed RNA polymerases I, II, and III 7.0 kDa polypeptide (EC 2.7.7.6) (ABC10-alpha) (RPB7.0) (RPB10alpha) {Homo sapiens}; contains Pfam profile PF03604: DNA directed RNA polymerase, 7 kDa subunit   chr5:16441278-16442180 FORWARD   Aliases: MEE6.8, MEE6_8                                                                                                                                                                                                                   | 10.6 | 8.6  | 2.0  | 15.8 |
| 3019 AT3G09300.1   oxysterol-binding family protein, similar to SP:P22059 Oxysterol-binding protein 1 {Homo sapiens}; contains Pfam profile PF01237: Oxysterol-binding protein   chr3:2857883-2860674 FORWARD   Aliases: F3L24.17                                                                                                                                                                                                                                                                                                                                                                   | 10.6 | 9.2  | 1.4  | 6.1  |
| 4315 AT5G66680.1   Symbol: DGL1   dolichyl-diphosphooligosaccharide-protein glycosyltransferase 48kDa subunit family protein, similar to SP:Q05052 Dolichyl-diphosphooligosaccharide--protein glycosyltransferase 48 kDa subunit precursor (EC 2.4.1.119) (Oligosaccharyl transferase 48 kDa subunit) {Canis familiaris}; contains Pfam profile PF03345: Dolichyl-diphosphooligosaccharide-protein glycosyltransferase 48kD subunit   chr5:26634770-26637893 REVERSE   Aliases: MSN2.7, MSN2_7                                                                                                      | 10.6 | 9.5  | 1.1  | 5.0  |
| 383 AT5G19370.1   rhodanese-like domain-containing protein / PPIC-type PPIASE domain-containing protein, low similarity to MPT-synthase sulfurylase (Synechococcus sp. PCC 7942) GI:2950364; contains Pfam profiles PF00581: Rhodanese-like domain, PF00639: PPIC-type PPIASE domain; identical to cDNA peptidyl-prolyl cis-trans isomerase GI:2246379   chr5:6524148-6526668 REVERSE   Aliases: F7K24.120, F7K24_120                                                                                                                                                                               | 10.6 | 7.8  | 2.7  | 13.0 |
| 11043 AT3G12290.1   tetrahydrofolate dehydrogenase/cyclohydrolase, putative, similar to SP:P07245 C-1-tetrahydrofolate synthase, cytoplasmic (C1-THF synthase) (Includes: Methylenetetrahydrofolate dehydrogenase (EC 1.5.1.5); Methenyltetrahydrofolate cyclohydrolase (EC 3.5.4.9); Formyltetrahydrofolate synthetase (EC 6.3.4.3)) {Saccharomyces cerevisiae}; contains Pfam profiles PF02882: Tetrahydrofolate dehydrogenase/cyclohydrolase, NAD(P)-binding domain, PF00763: Tetrahydrofolate dehydrogenase/cyclohydrolase, catalytic domain   chr3:3919509-3921526 FORWARD   Aliases: F28J15.8 | 10.6 | 9.9  | 0.7  | 2.1  |
| 16318 AT4G20850.1   Symbol: TPP2   subtilase family protein, contains similarity to Tripeptidyl-peptidase II (EC 3.4.14.10) (TPP-II) (Tripeptidyl aminopeptidase) (Swiss-Prot:P29144) (Homo sapiens)   chr4:11160732-11169900 REVERSE   Aliases: T13K14.10, T13K14_10, TRIPEPTIDYL PEPTIDASE II                                                                                                                                                                                                                                                                                                     | 10.6 | 10.7 | -0.2 | -0.9 |

|                                                                                                                                                                                                                                                                                                                                                                                                 |      |      |      |      |
|-------------------------------------------------------------------------------------------------------------------------------------------------------------------------------------------------------------------------------------------------------------------------------------------------------------------------------------------------------------------------------------------------|------|------|------|------|
| 20806 AT4G39980.1   Symbol: DHS1   2-dehydro-3-deoxyphosphoheptonate aldolase 1 / 3-deoxy-D-arabino-heptulosonate 7-phosphate synthase 1 / DAHP synthetase 1 (DHS1), nearly identical to SP:P29965   chr4:18539575-18542087 FORWARD   Aliases: 3 DEOXY D ARABINO HEPTULOSONATE 7 PHOSPHATE SYNTHASE 1, 3 DEOXY D ARABINO HEPTULOSONATE Y PHOSPHATE SYNTHASE, T5J17.150, T5J17_150               | 10.6 | 10.6 | -0.0 | -0.1 |
| 6213 AT4G16450.1   expressed protein   chr4:9280104-9280740 FORWARD   Aliases: DL4250W, FCAALL.388                                                                                                                                                                                                                                                                                              | 10.6 | 9.8  | 0.7  | 3.9  |
| 3033 AT5G45010.1   DSS1/SEM1 family protein, contains Pfam profile PF05160: DSS1/SEM1 family   chr5:18184471-18185601 REVERSE   Aliases: K21C13.20, K21C13_20                                                                                                                                                                                                                                   | 10.6 | 8.9  | 1.7  | 6.1  |
| 2187 AT1G01050.1   inorganic pyrophosphatase, putative (soluble) / pyrophosphate phospho-hydrolase, putative / PPase, putative, strong similarity to SP:Q43187 Soluble inorganic pyrophosphatase (EC 3.6.1.1) (Pyrophosphate phospho- hydrolase) (PPase) {Solanum tuberosum}; contains Pfam profile PF00719: inorganic pyrophosphatase   chr1:31181-33148 REVERSE   Aliases: T25K16.5, T25K16_5 | 10.6 | 8.4  | 2.2  | 7.1  |
| 20647 AT4G34110.1   Symbol: PAB2   polyadenylate-binding protein 2 (PABP2), non-consensus TA donor splice site at exon 2, polyadenylate-binding protein - Triticum aestivum (common wheat),PIR:T06979   chr4:16336392-16340102 FORWARD   Aliases: F28A23.130, F28A23_130, POLY(A) BINDING PROTEIN 2                                                                                             | 10.5 | 10.5 | 0.0  | 0.1  |
| 5066 AT5G54900.1   Symbol: ATRBP45A   RNA-binding protein 45 (RBP45), putative, contains similarity to polyadenylate-binding protein 5   chr5:22312609-22315572 FORWARD   Aliases: ATRBP45A, MBG8.17, MBG8_17                                                                                                                                                                                   | 10.5 | 9.2  | 1.4  | 4.5  |
| 2191 AT1G74470.1   geranylgeranyl reductase, identical to geranylgeranyl reductase GB:Y14044 (Arabidopsis thaliana) (involvement: chlorophyll, the tocopherol and the phylloquinone pathways Eur J Biochem 1998 Jan 15;251(1-2):413-7)   chr1:27994826-27996667 FORWARD   Aliases: F1M20.15, F1M20_15                                                                                           | 10.5 | 6.3  | 4.3  | 7.1  |
| 7734 AT4G10320.1   isoleucyl-tRNA synthetase, putative / isoleucine--tRNA ligase, putative, similar to SP:P41252 Isoleucyl-tRNA synthetase, cytoplasmic (EC 6.1.1.5) (Isoleucine--tRNA ligase) (IleRS) (IRS) {Homo sapiens}; contains Pfam profile PF00133: tRNA synthetases class I (I, L, M and V)   chr4:6397326-6404505 REVERSE   Aliases: F24G24.120, F24G24_120                           | 10.5 | 9.7  | 0.8  | 3.2  |
| 14977 AT4G22310.1   expressed protein, contains Pfam domain, PF03650: Uncharacterized protein family (UPF0041)   chr4:11791357-11792848 FORWARD   Aliases: T10I14.140, T10I14_140                                                                                                                                                                                                               | 10.5 | 9.9  | 0.6  | 1.2  |
| 4161 AT3G57050.3   Symbol: CBL   cystathionine beta-lyase, chloroplast / beta-cystathionase / cysteine lyase (CBL), identical to SP:P53780 Cystathionine beta-lyase, chloroplast precursor (EC 4.4.1.8) (CBL) (Beta-cystathionase) (Cysteine lyase) {Arabidopsis thaliana}                                                                                                                      | 10.5 | 9.2  | 1.3  | 5.1  |
| 1485 AT2G35635.1   Symbol: UBQ7   ubiquitin family protein, contains INTERPRO:IPR000626 ubiquitin domain   chr2:14988073-14989195 FORWARD   Aliases: None                                                                                                                                                                                                                                       | 10.5 | 6.6  | 3.9  | 8.3  |
| 7692 AT5G43060.1   cysteine proteinase, putative / thiol protease, putative, similar to cysteine proteinase RD21A precursor (thiol protease) GI:435619, SP:P43297 from (Arabidopsis thaliana)   chr5:17286772-17289388 REVERSE   Aliases: MMG4.7, MMG4_7                                                                                                                                        | 10.5 | 11.8 | -1.3 | -3.2 |
| 5308 AT3G58680.1   ethylene-responsive transcriptional coactivator, putative, similar to ethylene-responsive transcriptional coactivator (Lycopersicon esculentum) gi:5669634:gb:AAD46402   chr3:21718253-21719881 FORWARD   Aliases: T20N10.30, T20N10_30                                                                                                                                      | 10.5 | 8.9  | 1.6  | 4.4  |
| 7231 AT5G66760.1   Symbol: SDH1 1                                                                                                                                                                                                                                                                                                                                                               | 10.5 | 9.1  | 1.4  | 3.4  |
| 2992 AT3G55520.1   immunophilin, putative / FKBP-type peptidyl-prolyl cis-trans isomerase, putative, POSSIBLE PEPTIDYL-PROLYL CIS-TRANS ISOMERASE) (EC 5.2.1.8) (PPIASE) (ROTAMASE) SP:P30416(Mouse);P59 PROTEIN (HSP BINDING IMMUNOPHILIN), rabbit, SWISSPROT:P27124:FKB4_RABBIT   chr3:20604691-20606324 FORWARD   Aliases: T22E16.180                                                        | 10.5 | 8.6  | 2.0  | 6.1  |
| 1867 AT2G19680.1   mitochondrial ATP synthase g subunit family protein, contains Pfam profile: PF04718 mitochondrial ATP synthase g subunit                                                                                                                                                                                                                                                     | 10.5 | 7.0  | 3.5  | 7.6  |
| 7522 AT1G65820.1   microsomal glutathione s-transferase, putative, similar to MGST3_HUMAN SP:O14880                                                                                                                                                                                                                                                                                             | 10.5 | 11.4 | -0.9 | -3.3 |
| 6586 AT5G67590.1   Symbol: FRO1   NADH-ubiquinone oxidoreductase-related, contains weak similarity to NADH-ubiquinone oxidoreductase 21 kDa subunit, mitochondrial precursor (EC 1.6.5.3) (EC 1.6.99.3) (Complex I-21KD) (CI-21KD). (Swiss-Prot:P25711) (Neurospora crassa); contains Pfam PF04800: ETC complex I subunit conserved region                                                      | 10.5 | 8.8  | 1.7  | 3.7  |
| 20584 AT3G52930.1   fructose-bisphosphate aldolase, putative, similar to SP:O65735:ALF_CICAR Fructose-bisphosphate aldolase, cytoplasmic isozyme {Cicer arietinum}, cytosolic aldolase (Fragaria x ananassa) GI:10645188; contains Pfam profile PF00274 Fructose-bisphosphate aldolase class-I   chr3:19637726-19639920 REVERSE   Aliases: F8J2.100                                             | 10.5 | 10.5 | 0.1  | 0.1  |
| 2001 AT1G06680.1   Symbol: PSBP   photosystem II oxygen-evolving complex 23 (OEC23), JBC 14:211-238 (2002); identical to 23 kDa polypeptide of oxygen-evolving complex (OEC) GB:CAA66785 GI:1769905 (Arabidopsis thaliana)   chr1:2047878-2049417 FORWARD   Aliases: F12K11.3, F12K11_3, OE23, OEE2, OXYGEN EVOLVING ENHANCER PROTEIN 2                                                         | 10.5 | 6.7  | 3.8  | 7.4  |

|                   |                                                                                                                                                                                                                                                                                                                                                                                                                                                                                                                    |      |      |      |      |
|-------------------|--------------------------------------------------------------------------------------------------------------------------------------------------------------------------------------------------------------------------------------------------------------------------------------------------------------------------------------------------------------------------------------------------------------------------------------------------------------------------------------------------------------------|------|------|------|------|
| 3476 AT3G07568.1  | expressed protein   chr3:2416249-2417796 REVERSE   Aliases: None                                                                                                                                                                                                                                                                                                                                                                                                                                                   | 10.5 | 8.4  | 2.1  | 5.7  |
| 2494 AT3G09860.1  | expressed protein   chr3:3026125-3027213 FORWARD   Aliases: F8A24.9                                                                                                                                                                                                                                                                                                                                                                                                                                                | 10.5 | 7.5  | 3.0  | 6.7  |
| 10048 AT1G79660.1 | expressed protein   chr1:29980756-29981666 FORWARD   Aliases: F20B17.9, F20B17_9                                                                                                                                                                                                                                                                                                                                                                                                                                   | 10.5 | 9.7  | 0.8  | 2.3  |
| 17849 AT1G59960.1 | aldo/keto reductase, putative, similar to NADPH-dependent codeinone reductase GI:6478210 (Papaver somniferum), NAD(P)H dependent 6'-deoxychalcone synthase (Glycine max)(GI:18728)   chr1:22074961-22076812 REVERSE   Aliases: F23H11.27, F23H11_27                                                                                                                                                                                                                                                                | 10.5 | 10.7 | -0.2 | -0.6 |
| 10155 AT4G11150.1 | Symbol: TUF   vacuolar ATP synthase subunit E / V-ATPase E subunit / vacuolar proton pump E subunit (VATE), identical to SP:Q39258 Vacuolar ATP synthase subunit E (EC 3.6.3.14) (V-ATPase E subunit) (Vacuolar proton pump E subunit) {Arabidopsis thaliana}   chr4:6799958-6801927 FORWARD   Aliases: EMB2448, EMBRYO DEFECTIVE 2448, T22B4.130, T22B4_130, TUFF, VACUOLAR H+ ATPASE SUBUNIT E ISOFORM 1, VHA E1                                                                                                 | 10.5 | 11.1 | -0.6 | -2.3 |
| 4517 AT3G59280.1  | Symbol: TXR1   signaling molecule-related, contains similarity to mitochondria-associated granulocyte macrophage CSF signaling molecule, mitochondrial precursor (CGI-136) (Mus musculus) SWISS-PROT:Q9CQV1   chr3:21919890-21921699 REVERSE   Aliases: F25L23.140, THAXTOMIN A RESISTANT 1                                                                                                                                                                                                                        | 10.5 | 9.1  | 1.4  | 4.9  |
| 1063 AT3G47370.3  | similar to 40S ribosomal protein S20 (RPS20A) [Arabidopsis thaliana] (TAIR:At3g45030.1); similar to 40S ribosomal protein S20 (RPS20C) [Arabidopsis thaliana] (TAIR:At5g62300.1); similar to 40S subunit ribosomal protein [Oryza sativa (japonica cultivar-group)] (GB:XP_550614.1); contains InterPro domain Ribosomal protein S10, eukaryotic and archaeal form (InterPro:IPR005729); contains InterPro domain Ribosomal protein S10 (InterPro:IPR001848)   chr3:17464463-17465496 REVERSE   Aliases: T21L8.120 | 10.5 | 8.2  | 2.3  | 9.3  |
| 2319 AT1G62750.1  | elongation factor Tu family protein, similar to elongation factor G SP:P34811 (Glycine max (Soybean))   chr1:23237099-23240112 REVERSE   Aliases: F23N19.11, F23N19_11                                                                                                                                                                                                                                                                                                                                             | 10.5 | 6.9  | 3.6  | 6.9  |
| 3454 AT3G62810.1  | complex 1 family protein / LVR family protein, contains Pfam PF05347: Complex 1 protein (LYR family)   chr3:23238683-23239341 FORWARD   Aliases: F26K9.240                                                                                                                                                                                                                                                                                                                                                         | 10.5 | 7.4  | 3.1  | 5.7  |
| 12204 AT3G24830.1 | 60S ribosomal protein L13A (RPL13aB), similar to 60S RIBOSOMAL PROTEIN L13A GB:P35427 from (Rattus norvegicus)   chr3:9064570-9066089 FORWARD   Aliases: K7P8.13                                                                                                                                                                                                                                                                                                                                                   | 10.5 | 9.9  | 0.6  | 1.8  |
| 137 AT2G26500.2   | cytochrome b6f complex subunit (petM), putative, nearly identical to cytochrome b6f complex subunit (GI:3090403) (Arabidopsis thaliana); alternative splice forms exist   chr2:11277353-11278031 FORWARD   Aliases: T9J22.17, T9J22_17                                                                                                                                                                                                                                                                             | 10.5 | 3.8  | 6.7  | 18.6 |
| 20117 NA          |                                                                                                                                                                                                                                                                                                                                                                                                                                                                                                                    | 10.5 | 10.4 | 0.1  | 0.2  |
| 495 AT1G61520.2   | Symbol: LHCA3*1   similar to chlorophyll A-B binding protein, putative (LHCA5) [Arabidopsis thaliana] (TAIR:At1g45474.1); similar to chlorophyll A-B binding protein, putative (LHCA5) [Arabidopsis thaliana] (TAIR:At1g45474.2); similar to probable chlorophyll a/b-binding protein type III precursor - garden pea chloroplast (GB:T06411); contains InterPro domain Chlorophyll A-B binding protein (InterPro:IPR001344)   chr1:22703738-22705048 FORWARD   Aliases: LHCA3*1, T25B24.12, T25B24_12             | 10.5 | 6.3  | 4.2  | 12.0 |
| 5583 AT4G32940.1  | Symbol: GAMMA VPE   vacuolar processing enzyme gamma / gamma-VPE, nearly identical to SP:Q39119 Vacuolar processing enzyme, gamma-isozyme precursor (EC 3.4.22.-) (Gamma-VPE) {Arabidopsis thaliana}   chr4:15900273-15903271 REVERSE   Aliases: F26P21.60, F26P21_60, GAMMAVPE                                                                                                                                                                                                                                    | 10.5 | 11.8 | -1.3 | -4.2 |
| 5748 AT3G12260.1  | complex 1 family protein / LVR family protein, contains Pfam PF05347: Complex 1 protein (LYR family)   chr3:3908947-3910403 REVERSE   Aliases: F28J15.12                                                                                                                                                                                                                                                                                                                                                           | 10.5 | 8.2  | 2.3  | 4.2  |
| 9136 AT5G23540.1  | 26S proteasome regulatory subunit, putative, similar to 26S proteasome-associated pad1 homolog (Homo sapiens) GI:1923256, 26S proteasome, non-ATPase subunit (Mus musculus) GI:2505940; contains Pfam profile PF01398: Mov34/MPN/PAD-1 family   chr5:7937672-7939578 FORWARD   Aliases: MQM1.19, MQM1_19                                                                                                                                                                                                           | 10.5 | 8.7  | 1.7  | 2.7  |
| 4393 AT1G02160.1  | expressed protein   chr1:410785-411590 FORWARD   Aliases: T6A9.18                                                                                                                                                                                                                                                                                                                                                                                                                                                  | 10.5 | 9.4  | 1.0  | 5.0  |
| 8790 AT4G02890.3  | Symbol: UBQ14   polyubiquitin (UBQ14), identical to GI:166795; similar to N. sylvestris hexameric polyubiquitin, GenBank accession number M74101   chr4:1278530-1280028 REVERSE   Aliases: T5J8.21, T5J8_21                                                                                                                                                                                                                                                                                                        | 10.5 | 9.7  | 0.7  | 2.8  |
| 3470 AT3G11630.1  | 2-cys peroxiredoxin, chloroplast (BAS1), identical to SP:Q96291 2-cys peroxiredoxin BAS1, chloroplast precursor {Arabidopsis thaliana}; contains Pfam profile: PF00578 AhpC/TSA (alkyl hydroperoxide reductase and thiol-specific antioxidant) family   chr3:3672126-3674081 FORWARD   Aliases: F24K9.28, F24K9_28, T19F11.3                                                                                                                                                                                       | 10.5 | 7.1  | 3.3  | 5.7  |
| 8077 AT2G21870.2  | expressed protein   chr2:9327278-9329814 REVERSE   Aliases: F7D8.19, F7D8_19                                                                                                                                                                                                                                                                                                                                                                                                                                       | 10.5 | 8.9  | 1.6  | 3.1  |



|                                                                                                                                                                                                                                                                                                                                                                                                                       |      |      |      |      |
|-----------------------------------------------------------------------------------------------------------------------------------------------------------------------------------------------------------------------------------------------------------------------------------------------------------------------------------------------------------------------------------------------------------------------|------|------|------|------|
| 2944 AT3G59760.3   Symbol: OASC   cysteine synthase, mitochondrial, putative / O-acetylserine (thiol)-lyase, putative / O-acetylserine sulfhydrylase, putative, similar to SP:Q43725 Cysteine synthase, mitochondrial precursor (EC 4.2.99.8) (O- acetylserine sulfhydrylase) (O-acetylserine (Thiol)-lyase) {Arabidopsis thaliana}   chr3:22083451-22086393 REVERSE   Aliases: ATCS C, CSASE C, F24G16.30            | 10.5 | 7.6  | 2.9  | 6.2  |
| 11436 AT1G14400.2   Symbol: UBC1   ubiquitin-conjugating enzyme 1 (UBC1), E2; identical to gi:431259, SP:P25865   chr1:4927021-4928528 REVERSE   Aliases: ATUBC1, F14L17.17, F14L17_17, UBIQUITIN CARRIER PROTEIN 1                                                                                                                                                                                                   | 10.5 | 10.0 | 0.5  | 2.0  |
| 8749 AT1G16810.2   similar to CGI-144-like protein [Lycopersicon esculentum] (GB:CAC81814.1)   chr1:5755610-5756888 FORWARD   Aliases: F17F16.25                                                                                                                                                                                                                                                                      | 10.5 | 10.0 | 0.5  | 2.8  |
| 1879 AT4G21110.1   G10 family protein, contains Pfam profile: PF01125 G10 protein   chr4:11267196-11268968 FORWARD   Aliases: F7J7.50, F7J7_50                                                                                                                                                                                                                                                                        | 10.5 | 8.9  | 1.5  | 7.6  |
| 9092 AT5G61210.1   Symbol: SNAP33                                                                                                                                                                                                                                                                                                                                                                                     | 10.5 | 9.3  | 1.2  | 2.7  |
| 7005 AT2G41840.1   40S ribosomal protein S2 (RPS2C)                                                                                                                                                                                                                                                                                                                                                                   | 10.5 | 9.2  | 1.2  | 3.5  |
| 18846 NA                                                                                                                                                                                                                                                                                                                                                                                                              | 10.5 | 10.2 | 0.2  | 0.4  |
| 15367 ATCG00220.1   Symbol: PSBM   PSII low MW protein   chrC:28707-28811 REVERSE   Aliases: PSBM                                                                                                                                                                                                                                                                                                                     | 10.5 | 9.8  | 0.6  | 1.1  |
| 8930 AT1G72020.1   expressed protein   chr1:27112954-27114093 REVERSE   Aliases: F28P5.9, F28P5_9                                                                                                                                                                                                                                                                                                                     | 10.5 | 9.2  | 1.2  | 2.7  |
| 9479 AT2G35810.1   expressed protein   chr2:15056229-15057324 FORWARD   Aliases: F11F19.28, F11F19_28                                                                                                                                                                                                                                                                                                                 | 10.5 | 9.1  | 1.4  | 2.5  |
| 10043 AT1G51200.1   zinc finger (AN1-like) family protein, contains Pfam domains, PF01428: AN1-like Zinc finger and PF01754: A20-like zinc finger   chr1:18988102-18990236 FORWARD   Aliases: F11M15.7, F11M15_7                                                                                                                                                                                                      | 10.4 | 9.6  | 0.8  | 2.3  |
| 1258 AT1G60950.1   Symbol: FED A   ferredoxin, chloroplast (PETF), identical to FERREDOXIN PRECURSOR GB:P16972 (SP:P16972) from (Arabidopsis thaliana)   chr1:22448185-22448826 FORWARD   Aliases: FERRODOXIN A                                                                                                                                                                                                       | 10.4 | 6.0  | 4.4  | 8.8  |
| 5837 AT2G41530.1   esterase, putative, similar to SP:P10768 Esterase D (EC 3.1.1.1) {Homo sapiens}; contains Pfam profile: PF00756 putative esterase   chr2:17330573-17332689 REVERSE   Aliases: T32G6.5, T32G6_5                                                                                                                                                                                                     | 10.4 | 8.9  | 1.5  | 4.1  |
| 6500 AT2G26080.1   glycine dehydrogenase (decarboxylating), putative / glycine decarboxylase, putative / glycine cleavage system P-protein, putative, strong similarity to SP:P26969 Glycine dehydrogenase (decarboxylating), mitochondrial precursor (EC 1.4.4.2) {Pisum sativum}; contains Pfam profile PF02347: Glycine cleavage system P-protein   chr2:11116098-11120906 REVERSE   Aliases: T19L18.11, T19L18_11 | 10.4 | 8.8  | 1.7  | 3.8  |
| 7978 AT5G43460.1   lesion inducing protein-related, similar to ORF, able to induce HR-like lesions (Nicotiana tabacum)   chr5:17477112-17478979 FORWARD   Aliases: MWF20.18, MWF20_18                                                                                                                                                                                                                                 | 10.4 | 9.9  | 0.5  | 3.1  |
| 13258 AT1G68300.1   universal stress protein (USP) family protein, similar to ER6 protein (Lycopersicon esculentum) GI:5669654; contains Pfam profile PF00582: universal stress protein family   chr1:25602007-25603007 REVERSE   Aliases: T22E19.7, T22E19_7                                                                                                                                                         | 10.4 | 9.9  | 0.6  | 1.5  |
| 8238 ATCG00300.1   Symbol: YCF9   encodes PsbZ, which is a subunit of photosystem II. In Chlamydomonas, this protein has been shown to be essential in the interaction between PS II and the light harvesting complex II.   chrC:35751-35939 FORWARD   Aliases: YCF9                                                                                                                                                  | 10.4 | 9.5  | 1.0  | 3.0  |
| 8919 AT4G05160.1   Encodes a peroxisomal protein involved in the activation of fatty acids through esterification with CoA. At4g05160 preferentially activates fatty acids with medium chain length (C6:0 and C7:0) as well as even-numbered long-chain fatty acids (C14:0,                                                                                                                                           | 10.4 | 10.8 | -0.4 | -2.7 |
| 10237 ATCG00540.1   Symbol: PETA   Encodes cytochrome f apoprotein; involved in photosynthetic electron transport chain; encoded by the chloroplast genome and is transcriptionally repressed by a nuclear gene HCF2.   chrC:61657-62619 FORWARD   Aliases: PETA                                                                                                                                                      | 10.4 | 9.1  | 1.4  | 2.3  |
| 9084 AT5G41670.2   6-phosphogluconate dehydrogenase family protein, contains Pfam profiles: PF00393 6-phosphogluconate dehydrogenase C-terminal domain, PF03446 NAD binding domain of 6-phosphogluconate   chr5:16682558-16684399 REVERSE   Aliases: MBK23.20, MBK23_20                                                                                                                                               | 10.4 | 10.9 | -0.5 | -2.7 |
| 20751 AT1G24180.1   Symbol: IAR4   pyruvate dehydrogenase E1 component alpha subunit, mitochondrial, putative, similar to SP:P52901 Pyruvate dehydrogenase E1 component alpha subunit, mitochondrial precursor (EC 1.2.4.1) (PDHE1-A) {Arabidopsis thaliana}; contains Pfam profile PF00676: Dehydrogenase E1 component   chr1:8560519-8563484 REVERSE   Aliases: F3I6.11, F3I6_11                                    | 10.4 | 10.4 | 0.0  | 0.1  |
| 1746 AT1G73230.1   nascent polypeptide-associated complex (NAC) domain-containing protein, similar to SP:P20290 Transcription factor BTF3 (RNA polymerase B transcription factor 3) {Homo sapiens}; contains Pfam profile PF01849: NAC domain   chr1:27543969-27545603 REVERSE   Aliases: T18K17.10, T18K17_10                                                                                                        | 10.4 | 7.5  | 2.9  | 7.8  |
| 18106 AT3G10410.1   Symbol: SCPL49                                                                                                                                                                                                                                                                                                                                                                                    | 10.4 | 10.1 | 0.3  | 0.6  |



|                                                                                                                                                                                                                                                                                                                                                                                                                                                                                                          |      |      |      |      |
|----------------------------------------------------------------------------------------------------------------------------------------------------------------------------------------------------------------------------------------------------------------------------------------------------------------------------------------------------------------------------------------------------------------------------------------------------------------------------------------------------------|------|------|------|------|
| 2797 AT3G02560.2   40S ribosomal protein S7 (RPS7B), similar to ribosomal protein S7 GB:AAD26256 from ( <i>Secale cereale</i> )   chr3:541807-543341 FORWARD   Aliases: F16B3.19, F16B3_19                                                                                                                                                                                                                                                                                                               | 10.4 | 8.4  | 2.1  | 6.4  |
| 10725 AT3G50000.1   Symbol: CKA2   casein kinase II alpha chain 2, identical to casein kinase II, alpha chain 2 (CK II) ( <i>Arabidopsis thaliana</i> ) SWISS-PROT:Q08466   chr3:18545470-18547878 FORWARD   Aliases: ATCKA2, ATPK15D, CASEIN KINASE II, ALPHA CHAIN 2, F3A4.80                                                                                                                                                                                                                          | 10.4 | 9.5  | 0.9  | 2.2  |
| 16185 AT1G56580.1   expressed protein, contains Pfam profile PF04398: Protein of unknown function, DUF538   chr1:21201924-21202621 REVERSE   Aliases: F25P12.97, F25P12_97                                                                                                                                                                                                                                                                                                                               | 10.4 | 10.2 | 0.3  | 0.9  |
| 1648 AT1G17510.1   expressed protein   chr1:6023497-6024302 REVERSE   Aliases: F1L3.22, F1L3_22                                                                                                                                                                                                                                                                                                                                                                                                          | 10.4 | 7.6  | 2.8  | 8.0  |
| 19917 AT2G23070.1   casein kinase II alpha chain, putative, similar to casein kinase II, alpha chain (CK II) ( <i>Zea mays</i> ) SWISS-PROT:P28523; contains protein kinase domain, Pfam:PF00069   chr2:9831052-9833978 REVERSE   Aliases: F21P24.13, F21P24_13                                                                                                                                                                                                                                          | 10.4 | 10.5 | -0.1 | -0.2 |
| 17214 AT1G37130.1   Symbol: NIA2   nitrate reductase 2 (NR2), identical to SP:P11035 Nitrate reductase 2 (formerly EC 1.6.6.1) (NR2) { <i>Arabidopsis thaliana</i> }                                                                                                                                                                                                                                                                                                                                     | 10.4 | 10.7 | -0.3 | -0.7 |
| 23 AT5G64870.1   expressed protein   chr5:25946764-25948610 REVERSE   Aliases: MXK3.10, MXK3_10                                                                                                                                                                                                                                                                                                                                                                                                          | 10.4 | 2.9  | 7.5  | 30.0 |
| 4799 AT5G63000.1   expressed protein   chr5:25297238-25298759 REVERSE   Aliases: MJH22.6, MJH22_6                                                                                                                                                                                                                                                                                                                                                                                                        | 10.4 | 9.0  | 1.4  | 4.7  |
| 2063 AT1G26880.1   60S ribosomal protein L34 (RPL34A), identical to GB:Q42351, location of EST 105E2T7, gb:T22624   chr1:9315370-9316716 REVERSE   Aliases: T2P11.7, T2P11_7                                                                                                                                                                                                                                                                                                                             | 10.4 | 7.9  | 2.5  | 7.3  |
| 15500 AT3G14595.1   expressed protein   chr3:4908957-4910483 FORWARD   Aliases: None                                                                                                                                                                                                                                                                                                                                                                                                                     | 10.4 | 10.2 | 0.2  | 1.1  |
| 1943 AT5G02270.1   Symbol: ATNAP9                                                                                                                                                                                                                                                                                                                                                                                                                                                                        | 10.4 | 12.0 | -1.6 | -7.5 |
| 2919 AT3G46430.1   expressed protein   chr3:17098672-17099482 FORWARD   Aliases: F18L15.150, F18L15_150                                                                                                                                                                                                                                                                                                                                                                                                  | 10.4 | 8.6  | 1.8  | 6.2  |
| 1886 AT5G58420.1   40S ribosomal protein S4 (RPS4D), ribosomal protein S4, <i>Arabidopsis thaliana</i> , PIR:T48480                                                                                                                                                                                                                                                                                                                                                                                      | 10.4 | 8.5  | 1.9  | 7.6  |
| 4344 AT3G15590.1   DNA-binding protein, putative, similar to DNA-binding protein ( <i>Triticum aestivum</i> ) GI:6958202; contains Pfam profile: PF01535 PPR repeat   chr3:5275408-5277994 REVERSE   Aliases: MQD17.5                                                                                                                                                                                                                                                                                    | 10.4 | 9.6  | 0.8  | 5.0  |
| 2062 AT3G23990.1   Symbol: HSP60   chaperonin (CPN60) (HSP60), identical to SWISS-PROT:P29197- chaperonin CPN60, mitochondrial precursor (HSP60) ( <i>Arabidopsis thaliana</i> )   chr3:8668935-8672585 FORWARD   Aliases: F14O13.1                                                                                                                                                                                                                                                                      | 10.4 | 6.9  | 3.5  | 7.3  |
| 9408 AT1G51980.1   mitochondrial processing peptidase alpha subunit, putative, similar to mitochondrial processing peptidase alpha subunit, mitochondrial precursor, Alpha-MPP (Ubiquinol-cytochrome C reductase subunit II) ( <i>Potato</i> ) SWISS-PROT:P29677   chr1:19327071-19330551 REVERSE   Aliases: F5F19.4, F5F19_4                                                                                                                                                                            | 10.4 | 8.5  | 1.9  | 2.6  |
| 5436 AT3G17090.2   similar to protein phosphatase 2C family protein / PP2C family protein [ <i>Arabidopsis thaliana</i> ] (TAIR:At4g38520.2); similar to protein phosphatase 2C family protein / PP2C family protein [ <i>Arabidopsis thaliana</i> ] (TAIR:At4g38520.1); similar to protein phosphatase 2c-like protein [ <i>Thellungiella halophila</i> ] (GB:AAM19705.1); contains InterPro domain Protein phosphatase 2C-like (InterPro:IPR001932)   chr3:5826809-5829627 FORWARD   Aliases: K14A17.4 | 10.4 | 9.3  | 1.1  | 4.3  |
| 4864 AT1G49670.1   ARP protein (REF), identical to ARP protein GB:CAA89858 GI:886434 from ( <i>Arabidopsis thaliana</i> ); contains Pfam profile PF00107: oxidoreductase, zinc-binding dehydrogenase family   chr1:18384930-18389775 REVERSE   Aliases: F14J22.10, F14J22_10                                                                                                                                                                                                                             | 10.4 | 9.0  | 1.4  | 4.7  |
| 4570 AT1G73880.1   UDP-glucuronosyl/UDP-glucosyl transferase family protein, contains Pfam profile: PF00201 UDP-glucuronosyl and UDP-glucosyl transferase   chr1:27788642-27790465 FORWARD   Aliases: F2P9.25, F2P9_25                                                                                                                                                                                                                                                                                   | 10.4 | 7.4  | 3.0  | 4.8  |
| 1107 AT3G63410.1   Symbol: APG1   chloroplast inner envelope membrane protein, putative (APG1), similar to SP:P23525 37 kDa inner envelope membrane protein, chloroplast precursor (E37) { <i>Spinacia oleracea</i> }; contains Pfam profile PF01209: methyltransferase, UbiE/COQ5 family   chr3:23426190-23428093 REVERSE   Aliases: ALBINO OR PALE GREEN MUTANT 1, MAA21.40, VITAMIN E DEFECTIVE, VTE3                                                                                                 | 10.4 | 5.7  | 4.7  | 9.2  |
| 8416 AT2G02050.1   NADH-ubiquinone oxidoreductase B18 subunit, putative, contains Pfam PF05676: NADH-ubiquinone oxidoreductase B18 subunit (NDUFB7); similar to NADH-ubiquinone oxidoreductase B18 subunit (EC 1.6.5.3) (EC 1.6.99.3) (Complex I-B18) (CI-B18) (Cell adhesion protein SQM1) (Swiss-Prot:P17568) ( <i>Homo sapiens</i> ); similar to NADH:ubiquinone oxidoreductase NDUFB7 subunit (GI:9651635) ( <i>Homo sapiens</i> )                                                                   | 10.4 | 9.1  | 1.2  | 2.9  |
| 798 AT3G08690.1   ubiquitin-conjugating enzyme 11 (UBC11), E2; identical to gi:12643427, SP:P35134                                                                                                                                                                                                                                                                                                                                                                                                       | 10.4 | 6.9  | 3.4  | 10.3 |
| 2573 AT3G04840.1   40S ribosomal protein S3A (RPS3aA), similar to 40S ribosomal protein S3A (S phase specific protein GBIS289) GB:P49396 ( <i>Brassica rapa</i> )   chr3:1329699-1331581 FORWARD   Aliases: T9J14.21, T9J14_21                                                                                                                                                                                                                                                                           | 10.4 | 8.2  | 2.2  | 6.6  |

|                                                                                                                                                                                                                                                                                                                                                                                                                                                                                                                                                             |      |      |      |      |
|-------------------------------------------------------------------------------------------------------------------------------------------------------------------------------------------------------------------------------------------------------------------------------------------------------------------------------------------------------------------------------------------------------------------------------------------------------------------------------------------------------------------------------------------------------------|------|------|------|------|
| 164 AT1G48160.1   signal recognition particle 19 kDa protein, putative / SRP19, putative, similar to signal recognition particle 19 kDa protein subunit SRP19 GI:624221 (Oryza sativa (japonica cultivar-group)); contains Pfam profile: PF01922 SRP19 protein   chr1:17790214-17792693 REVERSE   Aliases: F21D18.11, F21D18_11                                                                                                                                                                                                                             | 10.4 | 6.7  | 3.7  | 17.4 |
| 18999 AT5G03345.1   expressed protein   chr5:814122-815618 FORWARD   Aliases: None                                                                                                                                                                                                                                                                                                                                                                                                                                                                          | 10.4 | 10.4 | -0.1 | -0.4 |
| 4129 AT2G27860.1   Symbol: AXS1   expressed protein   chr2:11871470-11873975 REVERSE   Aliases: F15K20.4, F15K20_4, UDP D APIOSE/UDP D XYLOSE SYNTHASE 1                                                                                                                                                                                                                                                                                                                                                                                                    | 10.4 | 8.3  | 2.1  | 5.1  |
| 4128 AT1G08200.1   Symbol: AXS2   expressed protein   chr1:2573857-2576709 REVERSE   Aliases: T23G18.6, T23G18_6, UDP D APIOSE/UDP D XYLOSE SYNTHASE 2                                                                                                                                                                                                                                                                                                                                                                                                      | 10.4 | 8.3  | 2.1  | 5.1  |
| 10430 ATCG01040.1   Symbol: YCF5   hypothetical protein   chrC:114461-115447 FORWARD   Aliases: YCF5                                                                                                                                                                                                                                                                                                                                                                                                                                                        | 10.4 | 9.0  | 1.4  | 2.2  |
| 7383 AT3G56460.1   oxidoreductase, zinc-binding dehydrogenase family protein, low similarity to probable NADP-dependent oxidoreductase (zeta-crystallin homolog) P1 (SP:Q39172)(gi:886428) and P2 (SP:Q39173)(gi:886430), zeta-crystallin / quinone reductase (NADPH) - Mus musculus, PIR:A54932; contains Pfam profile PF00107: oxidoreductase, zinc-binding dehydrogenase family   chr3:20943674-20945466 REVERSE   Aliases: T5P19.110                                                                                                                    | 10.4 | 9.4  | 1.0  | 3.4  |
| 11676 AT5G20000.1   Symbol: RPT6A   26S proteasome AAA-ATPase subunit, putative, almost identical to 26S proteasome AAA-ATPase subunit RPT6a GI:6652888 from (Arabidopsis thaliana); almost identical to a member of conserved Sug1 CAD family AtSUG1 GI:13537115 from (Arabidopsis thaliana)   chr5:6756635-6759751 FORWARD   Aliases: 26S PROTEASOME AAA ATPASE SUBUNIT, F28I16.150, F28I16_150                                                                                                                                                           | 10.4 | 8.7  | 1.6  | 1.9  |
| 11675 AT5G19990.1   Symbol: ATSUG1                                                                                                                                                                                                                                                                                                                                                                                                                                                                                                                          | 10.4 | 8.7  | 1.6  | 1.9  |
| 3728 AT4G15000.1   60S ribosomal protein L27 (RPL27C)   chr4:8571829-8572485 FORWARD   Aliases: DL3545W, FCAALL.99                                                                                                                                                                                                                                                                                                                                                                                                                                          | 10.4 | 8.0  | 2.4  | 5.5  |
| 4937 AT3G46040.1   40S ribosomal protein S15A (RPS15aD), cytoplasmic ribosomal protein S15a, Arabidopsis thaliana, EMBL:ATAF1412   chr3:16925554-16926744 FORWARD   Aliases: F12M12.10                                                                                                                                                                                                                                                                                                                                                                      | 10.4 | 9.2  | 1.1  | 4.6  |
| 493 AT1G80560.1   3-isopropylmalate dehydrogenase, chloroplast, putative, strong similarity to 3-ISOPROPYLMALATE DEHYDROGENASE PRECURSOR GB:P29102 SP:P29102 from (Brassica napus)                                                                                                                                                                                                                                                                                                                                                                          | 10.4 | 5.4  | 5.0  | 12.0 |
| 5628 AT5G16470.1   zinc finger (C2H2 type) family protein, contains Pfam profile: PF00096 zinc finger, C2H2 type   chr5:5379419-5380043 FORWARD   Aliases: MQK4.20, MQK4_20                                                                                                                                                                                                                                                                                                                                                                                 | 10.4 | 9.2  | 1.2  | 4.2  |
| 18477 AT4G02620.1   vacuolar ATPase subunit F family protein, contains weak similarity to vacuolar ATP synthase subunit F (EC 3.6.3.14) (V-ATPase F subunit) (Vacuolar proton pump F subunit) (V-ATPase 14 kDa subunit) (Swiss-Prot:P50408) (Rattus norvegicus); contains Pfam PF01990: ATP synthase (F/14-kDa) subunit   chr4:1149248-1151346 REVERSE   Aliases: T10P11.25, T10P11_25                                                                                                                                                                      | 10.4 | 10.5 | -0.1 | -0.5 |
| 8983 AT2G01470.1   Symbol: STL2P   St12p protein (ST12p) / SEC12p protein, putative, 99.8% identical to St12p protein (GI:166878) {Arabidopsis thaliana}   chr2:211969-214464 REVERSE   Aliases: ATSEC12, F2I9.9, F2I9_9, SEC12P LIKE PROTEIN                                                                                                                                                                                                                                                                                                               | 10.4 | 9.6  | 0.7  | 2.7  |
| 104 AT3G26650.1   Symbol: GAPA   glyceraldehyde 3-phosphate dehydrogenase A, chloroplast (GAPA) / NADP-dependent glyceraldehydephosphate dehydrogenase subunit A, identical to SP:P25856 Glyceraldehyde 3-phosphate dehydrogenase A, chloroplast precursor (EC 1.2.1.13) (NADP-dependent glyceraldehydephosphate dehydrogenase subunit A) {Arabidopsis thaliana}   chr3:9796330-9798282 FORWARD   Aliases: GAPA 1, GLYCERALDEHYDE 3 PHOSPHATE DEHYDROGENASE A SUBUNIT, GLYCERALDEHYDE 3 PHOSPHATE DEHYDROGENASE A SUBUNIT, MLJ15.3                          | 10.4 | 2.9  | 7.4  | 20.4 |
| 5259 AT1G45000.1   26S proteasome regulatory complex subunit p42D, putative, similar to 26S proteasome regulatory complex subunit p42D (Drosophila melanogaster) gi:6434958:gb:AAF08391   chr1:17011584-17014326 FORWARD   Aliases: F27F5.8, F27F5_8                                                                                                                                                                                                                                                                                                        | 10.3 | 9.4  | 1.0  | 4.4  |
| 4181 AT4G34030.1   Symbol: MCCB   methylcrotonyl-CoA carboxylase beta chain, mitochondrial / 3-methylcrotonyl-CoA carboxylase 2 (MCCB), identical to SP:Q9LDD8 Methylcrotonyl-CoA carboxylase beta chain, mitochondrial precursor (EC 6.4.1.4) (3-Methylcrotonyl-CoA carboxylase 2) (MCCase beta subunit) (3-methylcrotonyl-CoA:carbon dioxide ligase beta subunit) {Arabidopsis thaliana}; contains Pfam profile: PF01039 carboxyl transferase domain   chr4:16301198-16304031 FORWARD   Aliases: 3 METHYLCROTONYL COA CARBOXYLASE, F28A23.210, F28A23_210 | 10.3 | 9.5  | 0.9  | 5.1  |
| 5827 AT4G18040.1   Symbol: EIF4E   eukaryotic translation initiation factor 4E 1 / eIF-4E1 / mRNA cap-binding protein 1 (EIF4E1), identical to SP:O23252 Eukaryotic translation initiation factor 4E (eIF-4E) (eIF4E) (mRNA cap-binding protein) (eIF-4F 25 kDa subunit) (eIF-4F P26 subunit) {Arabidopsis thaliana}   chr4:10016583-10018198 REVERSE   Aliases: AT.EIF4E1, CUCUMOVIRUS MULTIPLICATION 1, CUM1, EUKARYOTIC TRANSLATION INITIATION FACTOR 4E, F15J5.10, F15J5_10, LSP1                                                                       | 10.3 | 8.1  | 2.2  | 4.1  |
| 1081 AT5G27770.1   60S ribosomal protein L22 (RPL22C), ribosomal protein L22 (cytosolic), Rattus norvegicus, PIR:S52084   chr5:9835890-9837332 FORWARD   Aliases: T1G16.100, T1G16_100                                                                                                                                                                                                                                                                                                                                                                      | 10.3 | 8.0  | 2.3  | 9.3  |
| 14225 AT3G46000.1   Symbol: ADF2   actin-depolymerizing factor, putative (ADF2), strong similarity to SP:Q9ZSK3 Actin-depolymerizing factor 4 (ADF-4) (AtADF4) {Arabidopsis thaliana}; contains Pfam profile PF00241: Cofilin/tropomyosin-type actin-binding protein   chr3:16918466-16919980 REVERSE   Aliases: ACTIN DEPOLYMERIZING FACTOR 2, F16L2.210                                                                                                                                                                                                   | 10.3 | 9.9  | 0.4  | 1.3  |

|                                                                                                                                                                                                                                                                                                                                                                                                                                                                                                                                                                                          |      |      |      |      |
|------------------------------------------------------------------------------------------------------------------------------------------------------------------------------------------------------------------------------------------------------------------------------------------------------------------------------------------------------------------------------------------------------------------------------------------------------------------------------------------------------------------------------------------------------------------------------------------|------|------|------|------|
| 4001 AT2G16060.1   Symbol: AHB1   non-symbiotic hemoglobin 1 (HB1) (GLB1), identical to SP:O24520 Non-symbiotic hemoglobin 1 (Hb1) (ARATH GLB1) {Arabidopsis thaliana}   chr2:6989703-6990713 REVERSE   Aliases: ARATH GLB1, F7H1.8, F7H1_8, GLB1, HEMOGLOBIN, NSHB1                                                                                                                                                                                                                                                                                                                     | 10.3 | 9.1  | 1.3  | 5.3  |
| 10963 AT2G44060.2   late embryogenesis abundant family protein / LEA family protein, similar to ethylene-responsive late embryogenesis-like protein (Lycopersicon esculentum) GI:1684830; contains Pfam profile PF03168: Late embryogenesis abundant protein                                                                                                                                                                                                                                                                                                                             | 10.3 | 9.2  | 1.1  | 2.1  |
| 10937 ATCG00040.1   Symbol: MATK   Encodes a maturase located in the trnK intron in the chloroplast genome.                                                                                                                                                                                                                                                                                                                                                                                                                                                                              | 10.3 | 8.9  | 1.5  | 2.1  |
| 5470 AT5G65760.1   serine carboxypeptidase S28 family protein, similar to SP:P42785 Lysosomal Pro-X carboxypeptidase precursor (EC 3.4.16.2) (Prolylcarboxypeptidase) (PRCP) (Proline carboxypeptidase) {Homo sapiens}; contains Pfam profile PF05577: Serine carboxypeptidase S28                                                                                                                                                                                                                                                                                                       | 10.3 | 8.8  | 1.5  | 4.3  |
| 1035 AT4G00810.2   60S acidic ribosomal protein P1 (RPP1B), similar to acidic ribosomal protein p1   chr4:345952-347192 REVERSE   Aliases: A_TM018A10.9, A_TM018A10_9, T18A10.8, T18A10_8                                                                                                                                                                                                                                                                                                                                                                                                | 10.3 | 6.5  | 3.9  | 9.4  |
| 3115 AT5G24800.1   Symbol: BZO2H2                                                                                                                                                                                                                                                                                                                                                                                                                                                                                                                                                        | 10.3 | 8.7  | 1.7  | 6.0  |
| 1696 AT3G06610.1   DNA-binding enhancer protein-related, similar to huntingtin interacting protein HYPK (GI:3329429) (Homo sapiens); identical to Egd2p (GI:172043) (Saccharomyces cerevisiae) similar to EGD2 protein (GAL4 DNA-binding enhancer protein 2) (Swiss-Prot:P38879) (Saccharomyces cerevisiae)                                                                                                                                                                                                                                                                              | 10.3 | 8.4  | 1.9  | 7.9  |
| 1842 AT3G14600.1   60S ribosomal protein L18A (RPL18aC), similar to GB:CAA08791 from (Podocoryne carnea)   chr3:4910704-4912180 FORWARD   Aliases: MIE1.10                                                                                                                                                                                                                                                                                                                                                                                                                               | 10.3 | 7.7  | 2.6  | 7.6  |
| 13371 AT1G56190.1   phosphoglycerate kinase, putative, similar to SP:P41758 Phosphoglycerate kinase, chloroplast precursor (EC 2.7.2.3) {Chlamydomonas reinhardtii}; contains Pfam profile PF00162: phosphoglycerate kinase   chr1:21032030-21034314 FORWARD   Aliases: F14G9.19, F14G9_19                                                                                                                                                                                                                                                                                               | 10.3 | 9.8  | 0.5  | 1.5  |
| 3892 AT1G23310.2   Symbol: GGT1   similar to glutamate:glyoxylate aminotransferase 2 (GGT2) [Arabidopsis thaliana] (TAIR:At1g70580.1); similar to glutamate:glyoxylate aminotransferase 2 (GGT2) [Arabidopsis thaliana] (TAIR:At1g70580.2); similar to alanine aminotransferase [Oryza sativa (indica cultivar-group)] (GB:AAO84040.1); contains InterPro domain 1-aminocyclopropane-1-carboxylate synthase (InterPro:IPR001176)   chr1:8268393-8271922 REVERSE   Aliases: ALANINE 2 OXOGLUTARATE AMINOTRANSFERASE 1, AOAT1, F26F24.16, F26F24_16, GLUTAMATE:GLYOXYLATE AMINOTRANSFERASE | 10.3 | 9.0  | 1.3  | 5.3  |
| 1622 AT3G22630.1   Symbol: PBD1   20S proteasome beta subunit D (PBD1) (PRGB), identical to GB:CAA74026 from (Arabidopsis thaliana) ( FEBS Lett. (1997) 416 (3), 281-285); identical to cDNA proteasome subunit prgb GI:2511589   chr3:8009547-8010851 REVERSE   Aliases: F16J14.20, MULTICATALYTIC ENDOPEPTIDASE COMPLEX, PROTEASOME COMPONENT, BETA SUBUNIT, PRCGB, PROTEASOME SUBUNIT PRGB                                                                                                                                                                                            | 10.3 | 7.2  | 3.1  | 8.0  |
| 2228 AT5G60540.1   Symbol: EMB2407   SNO glutamine amidotransferase family protein, similar to pyridoxine synthesis protein PDX2 (Cercospora nicotianae) GI:9954418; contains Pfam profile PF01174: SNO glutamine amidotransferase family   chr5:24353849-24356028 REVERSE   Aliases: EMB2407, EMBRYO DEFECTIVE 2407, MUF9.1, MUF9_1                                                                                                                                                                                                                                                     | 10.3 | 6.7  | 3.6  | 7.1  |
| 2028 AT1G18500.1   2-isopropylmalate synthase, putative, strong similarity to 2-isopropylmalate synthase (IMS1) (Arabidopsis thaliana) GI:12330687; contains Pfam profile PF00682: HMGL-like   chr1:6369340-6373018 FORWARD   Aliases: F15H18.3, F15H18_3                                                                                                                                                                                                                                                                                                                                | 10.3 | 7.5  | 2.8  | 7.3  |
| 1480 AT1G07700.3   thioredoxin family protein, low similarity to thioredoxin (Gallus gallus) GI:212766; contains Pfam profile: PF00085 Thioredoxin   chr1:2379644-2381357 FORWARD   Aliases: F24B9.21, F24B9_21                                                                                                                                                                                                                                                                                                                                                                          | 10.3 | 7.2  | 3.1  | 8.3  |
| 2417 AT3G23570.1   dienelactone hydrolase family protein, similar to SP:Q9ZT66 Endo-1,3;1,4-beta-D-glucanase precursor (EC 3.2.1.-) {Zea mays}; contains Pfam profile: PF01738 dienelactone hydrolase family   chr3:8457785-8459698 REVERSE   Aliases: MDB19.5                                                                                                                                                                                                                                                                                                                           | 10.3 | 6.6  | 3.7  | 6.8  |
| 1170 AT4G10040.1   cytochrome c, putative, similar to cytochrome c (Pumpkin, Winter squash) SWISS-PROT:P00051   chr4:6276995-6278501 FORWARD   Aliases: F28M11.5                                                                                                                                                                                                                                                                                                                                                                                                                         | 10.3 | 7.5  | 2.8  | 9.0  |
| 2629 AT4G22740.2   glycine-rich protein   chr4:11942812-11945967 REVERSE   Aliases: T12H17.1                                                                                                                                                                                                                                                                                                                                                                                                                                                                                             | 10.3 | 8.0  | 2.3  | 6.5  |
| 13842 AT2G46800.2   Symbol: ZAT1   zinc transporter (ZAT), identical to zinc transporter ZAT (Arabidopsis thaliana) gi:4206640:gb:AAD11757; member of the cation diffusion facilitator (CDF) family, or cation efflux (CE) family, PMID:11500563   chr2:19244503-19246474 FORWARD   Aliases: ATMTP1, F19D11.8, MTP1, ZINC TRANSPORTER OF ARABIDOPSIS THALIANA, ZINC TRANSPORTER ZAT                                                                                                                                                                                                      | 10.3 | 10.6 | -0.3 | -1.4 |
| 2480 AT5G14590.1   isocitrate dehydrogenase, putative / NADP+ isocitrate dehydrogenase, putative, strong similarity to isocitrate dehydrogenase (NADP+) (Nicotiana tabacum) GI:3021512; contains Pfam domain PF00180: dehydrogenase, isocitrate/isopropylmalate family   chr5:4703301-4706738 REVERSE   Aliases: T15N1.80, T15N1_80                                                                                                                                                                                                                                                      | 10.3 | 8.1  | 2.2  | 6.7  |
| 16513 AT2G40890.1   Symbol: CYP98A3   cytochrome P450 98A3, putative (CYP98A3), identical to Cytochrome P450 98A3 (SP:O22203) (Arabidopsis thaliana); similar to gi:17978651 from Pinus taeda   chr2:17065131-17067730 REVERSE   Aliases: REF8, T20B5.9, T20B5_9                                                                                                                                                                                                                                                                                                                         | 10.3 | 10.7 | -0.4 | -0.9 |



|                                                                                                                                                                                                                                                                                                                                                                                                                                                                                                                                                                                   |      |      |      |      |
|-----------------------------------------------------------------------------------------------------------------------------------------------------------------------------------------------------------------------------------------------------------------------------------------------------------------------------------------------------------------------------------------------------------------------------------------------------------------------------------------------------------------------------------------------------------------------------------|------|------|------|------|
| 16121 AT1G53280.1   DJ-1 family protein, similar to DJ-1 protein (Homo sapiens) GI:1780755; similar to DJ-1 beta (GI:18642508) (Drosophila melanogaster); contains Pfam profile: PF01965 Thij/Pfpl family; TIGRFAM TIGR01383: DJ-1 family protein   chr1:19867968-19871057 REVERSE   Aliases: F12M16.18, F12M16_18                                                                                                                                                                                                                                                                | 10.3 | 10.4 | -0.2 | -0.9 |
| 7509 AT5G19550.1   Symbol: ASP2   aspartate aminotransferase, cytoplasmic isozyme 1 / transaminase A (ASP2), identical to SP:P46645 Aspartate aminotransferase, cytoplasmic isozyme 1 (EC 2.6.1.1) (Transaminase A) {Arabidopsis thaliana}                                                                                                                                                                                                                                                                                                                                        | 10.3 | 8.4  | 1.9  | 3.3  |
| 3519 AT3G59540.1   60S ribosomal protein L38 (RPL38B), 60S RIBOSOMAL PROTEIN L38 - Lycopersicon esculentum, EMBL:X69979   chr3:22006655-22007783 REVERSE   Aliases: T16L24.90                                                                                                                                                                                                                                                                                                                                                                                                     | 10.3 | 7.7  | 2.6  | 5.6  |
| 8613 AT5G53350.1   Symbol: CLPX   ATP-dependent Clp protease ATP-binding subunit ClpX1 (CLPX), identical to CLP protease regulatory subunit CLPX GI:2674203 from (Arabidopsis thaliana)   chr5:21661124-21664933 FORWARD   Aliases: K19E1.15, K19E1_15                                                                                                                                                                                                                                                                                                                            | 10.3 | 10.8 | -0.5 | -2.9 |
| 5187 AT3G60820.2   Symbol: PBF1   similar to 20S proteasome beta subunit C1 (PBC1) (PRCT) [Arabidopsis thaliana] (TAIR:At1g21720.1); similar to beta 6 subunit of 20S proteasome [Oryza sativa (japonica cultivar-group)] (GB:BAA28276.1); contains InterPro domain Proteasome B-type subunit (InterPro:IPR000243); contains InterPro domain Multispecific proteasome protease (InterPro:IPR001353)   chr3:22482730-22484904 REVERSE   Aliases: 20S PROTEASOME BETA SUBUNIT PBF1, T4C21.230                                                                                       | 10.3 | 8.2  | 2.1  | 4.5  |
| 8953 ATCG00790.1   Symbol: RPL16   chloroplast gene encoding a ribosomal protein L16, which is a constituent of 50S large ribosomal subunit   chrC:81189-82652 REVERSE   Aliases: RIBOSOMAL PROTEIN L16, RPL16                                                                                                                                                                                                                                                                                                                                                                    | 10.3 | 8.1  | 2.1  | 2.7  |
| 3248 AT5G20180.2   ribosomal protein L36 family protein, contains Pfam profile: PF00444 ribosomal protein L36   chr5:6810966-6812148 FORWARD   Aliases: F5O24.70, F5O24_70                                                                                                                                                                                                                                                                                                                                                                                                        | 10.3 | 8.8  | 1.5  | 5.9  |
| 9531 AT4G34230.2   Symbol: CAD5   similar to cinnamyl-alcohol dehydrogenase (CAD) [Arabidopsis thaliana] (TAIR:At3g19450.1); similar to cinnamyl alcohol dehydrogenase [Aralia cordata] (GB:BAA03099.1); contains InterPro domain Zinc-containing alcohol dehydrogenase superfamily (InterPro:IPR002085); contains InterPro domain Zinc-containing alcohol dehydrogenase (InterPro:IPR002328)   chr4:16386723-16388723 REVERSE   Aliases: ATCAD5, CAD 5, CINNAMYL ALCOHOL DEHYDROGENASE 5, F10M10.11                                                                              | 10.3 | 9.1  | 1.2  | 2.5  |
| 4136 AT5G15320.1   expressed protein, predicted protein, Arabidopsis thaliana   chr5:4977541-4978897 FORWARD   Aliases: F8M21.210, F8M21_210                                                                                                                                                                                                                                                                                                                                                                                                                                      | 10.3 | 9.3  | 1.0  | 5.1  |
| 289 AT2G41300.1   strictosidine synthase family protein, similar to strictosidine synthase (Rauvolfia serpentina)(SP:P15324); contains strictosidine synthase domain PF03088; protein alignments support a CG non-consensus donor splice site.   chr2:17221315-17223370 REVERSE   Aliases: F13H10.15, F13H10_15                                                                                                                                                                                                                                                                   | 10.3 | 3.6  | 6.7  | 14.5 |
| 1141 AT5G67490.1   expressed protein   chr5:26951379-26952178 REVERSE   Aliases: K9I9.5, K9I9_5                                                                                                                                                                                                                                                                                                                                                                                                                                                                                   | 10.3 | 7.7  | 2.6  | 9.1  |
| 4114 AT2G45790.1   eukaryotic phosphomannomutase family protein, contains Pfam profile: PF03332 eukaryotic phosphomannomutase   chr2:18862853-18865442 FORWARD   Aliases: F4I18.23                                                                                                                                                                                                                                                                                                                                                                                                | 10.3 | 8.7  | 1.6  | 5.2  |
| 642 AT5G30510.1   30S ribosomal protein S1, putative, similar to Swiss-Prot:P29344 30S ribosomal protein S1, chloroplast precursor (CS1) (Spinacia oleracea)   chr5:11636256-11638528 REVERSE   Aliases: None                                                                                                                                                                                                                                                                                                                                                                     | 10.3 | 7.9  | 2.4  | 11.0 |
| 956 AT1G09200.1   histone H3, identical to histone H3 from Zea mays SP:P05203, Medicago sativa GI:166384, Encephalartos altensteinii SP:P08903, Pisum sativum SP:P02300; contains Pfam profile PF00125 Core histone H2A/H2B/H3/H4   chr1:2971595-2972201 REVERSE   Aliases: T12M4.9                                                                                                                                                                                                                                                                                               | 10.3 | 3.9  | 6.3  | 9.7  |
| 1423 AT4G15930.1   dynein light chain, putative, similar to dynein light chain 2 (Mus musculus) GI:15545995; contains Pfam profile PF01221: Dynein light chain type 1   chr4:9036236-9038077 FORWARD   Aliases: DL4005W, FCAALL.238                                                                                                                                                                                                                                                                                                                                               | 10.3 | 8.8  | 1.4  | 8.4  |
| 17168 AT5G46730.1   glycine-rich protein   chr5:18981239-18982295 FORWARD   Aliases: MZA15.15, MZA15_15                                                                                                                                                                                                                                                                                                                                                                                                                                                                           | 10.3 | 9.9  | 0.3  | 0.7  |
| 5790 AT1G56340.2   Symbol: CRT1   similar to calreticulin 2 (CRT2) [Arabidopsis thaliana] (TAIR:At1g09210.1); similar to calreticulin [Beta vulgaris subsp. vulgaris] (GB:CAA05161.1); similar to calreticulin [Nicotiana glauca] (GB:CAA95999.1); similar to calreticulin (GB:AAA80652.1); similar to calcium-binding protein calreticulin [Prunus armeniaca] (GB:AAD32207.1); similar to CRTC_RICCO Calreticulin precursor (GB:P93508); contains InterPro domain Calreticulin (InterPro:IPR001580)   chr1:21093545-21096322 REVERSE   Aliases: CALRETICULIN 1, F14G9.5, F14G9_5 | 10.3 | 9.0  | 1.3  | 4.1  |
| 658 AT1G05205.1   expressed protein   chr1:1509212-1510280 REVERSE   Aliases: None                                                                                                                                                                                                                                                                                                                                                                                                                                                                                                | 10.3 | 8.1  | 2.1  | 10.9 |
| 3032 AT1G47260.1   Symbol: APFI   bacterial transferase hexapeptide repeat-containing protein, contains Pfam profile PF00132: Bacterial transferase hexapeptide (four repeats)   chr1:17323048-17325924 REVERSE   Aliases: F8G22.2, F8G22_2                                                                                                                                                                                                                                                                                                                                       | 10.3 | 8.7  | 1.6  | 6.1  |
| 13733 AT5G10450.2   Symbol: GRF6   similar to 14-3-3 protein GF14 kappa (GRF8) [Arabidopsis thaliana] (TAIR:At5g65430.2); similar to 14-3-3 g-1 protein [Nicotiana tabacum] (GB:BAD12179.1); similar to 14-3-3 protein [Solanum tuberosum] (GB:CAA72384.1); similar to GF14 lambda [Brassica napus] (GB:AAK26636.1); contains InterPro domain 14-3-3 protein (InterPro:IPR000308)   chr5:3283868-3286348 REVERSE   Aliases: 14 3 3 LIKE PROTEIN 1, AFT1, F12B17.200, F12B17_200, GF14 LAMBDA                                                                                      | 10.3 | 10.7 | -0.5 | -1.4 |



|                                                                                                                                                                                                                                                                                                                                                                                                                                                           |      |      |      |       |
|-----------------------------------------------------------------------------------------------------------------------------------------------------------------------------------------------------------------------------------------------------------------------------------------------------------------------------------------------------------------------------------------------------------------------------------------------------------|------|------|------|-------|
| 8251 AT2G34470.2   Symbol: UREG   similar to urease accessory protein G [Solanum tuberosum] (GB:CAC33002.1); similar to urease accessory protein G [Solanum tuberosum] (GB:CAC33000.1); contains InterPro domain Urease accessory protein UreG (InterPro:IPR004400); contains InterPro domain HypB/UreG, nucleotide-binding (InterPro:IPR002894)   chr2:14537814-14539584 REVERSE   Aliases: PSKF109, T31E10.19, T31E10_19, UREASE ACCESSORY PROTEIN UREG | 10.3 | 11.1 | -0.8 | -3.0  |
| 13428 AT4G26710.2   ATP synthase subunit H family protein, contains similarity to Swiss-Prot:O15342 Vacuolar ATP synthase subunit H (V-ATPase H subunit) (Vacuolar proton pump H subunit) (V-ATPase M9.2 subunit) (V-ATPase 9.2 kDa membrane accessory protein) (Homo sapiens)   chr4:13468603-13469941 FORWARD   Aliases: F10M23.50, F10M23_50                                                                                                           | 10.3 | 9.8  | 0.5  | 1.5   |
| 228 AT5G13280.1   Symbol: AK LYS1   aspartate kinase, identical to aspartate kinase (Arabidopsis thaliana) GI:4376158   chr5:4249441-4252839 FORWARD   Aliases: AK, ASPARTATE KINASE, T31B5.100, T31B5_100                                                                                                                                                                                                                                                | 10.3 | 5.5  | 4.7  | 15.7  |
| 2860 AT3G13580.3   60S ribosomal protein L7 (RPL7D), similar to 60S ribosomal protein L7 GB:AAD14525 GI:4262232 from (Arabidopsis thaliana)                                                                                                                                                                                                                                                                                                               | 10.3 | 8.7  | 1.5  | 6.3   |
| 1389 AT5G47700.1   60S acidic ribosomal protein P1 (RPP1C)   chr5:19345029-19346209 REVERSE   Aliases: MCA23.2, MCA23_2                                                                                                                                                                                                                                                                                                                                   | 10.3 | 8.2  | 2.0  | 8.5   |
| 846 AT1G20450.2   Symbol: ERD10   dehydrin (ERD10), identical to dehydrin ERD10 (Low-temperature-induced protein LTI45) (Arabidopsis thaliana) SWISS-PROT:P42759   chr1:7087993-7089596 REVERSE   Aliases: ER10, ERD10, F5M15.21, F5M15_21, LTI45                                                                                                                                                                                                         | 10.3 | 12.8 | -2.5 | -10.1 |
| 1055 AT4G13170.1   60S ribosomal protein L13A (RPL13aC), ribosomal protein L13a -Lupinus luteus,PID:e1237871   chr4:7654940-7656561 REVERSE   Aliases: F17N18.60, F17N18_60                                                                                                                                                                                                                                                                               | 10.3 | 6.9  | 3.3  | 9.4   |
| 4962 AT3G53430.1   60S ribosomal protein L12 (RPL12B), 60S RIBOSOMAL PROTEIN L12, Prunus armeniaca, SWISSPROT:RL12_PRUAR   chr3:19820665-19821447 REVERSE   Aliases: F4P12.130                                                                                                                                                                                                                                                                            | 10.2 | 8.2  | 2.0  | 4.6   |
| 11065 AT5G27380.1   Symbol: GSH2   glutathione synthetase (GSH2), non-consensus AT donor splice site at exon 6, AC acceptor splice site at exon 7; identical to Swiss-Prot:P46416 glutathione synthetase, chloroplast precursor (Glutathione synthase) (GSH synthetase) (GSH-S) (Arabidopsis thaliana)   chr5:9668039-9670858 REVERSE   Aliases: F21A20.90, F21A20_90, GLUTATHIONE SYNTHETASE, GSHB                                                       | 10.2 | 10.5 | -0.3 | -2.1  |
| 599 AT4G12600.1   ribosomal protein L7Ae/L30e/S12e/Gadd45 family protein, Similar to NHP2/L7Ae family proteins, see SWISSPROT:P32495 and PMID:2063628.   chr4:7453199-7454478 FORWARD   Aliases: T1P17.190, T1P17_190                                                                                                                                                                                                                                     | 10.2 | 6.8  | 3.5  | 11.3  |
| 360 AT1G70780.1   expressed protein   chr1:26698845-26700041 REVERSE   Aliases: F5A18.4, F5A18_4                                                                                                                                                                                                                                                                                                                                                          | 10.2 | 11.8 | -1.5 | -13.4 |
| 6264 AT3G61220.1   short-chain dehydrogenase/reductase (SDR) family protein, similar to carbonyl reductase GI:1049108 from (Mus musculus)   chr3:22673962-22675468 FORWARD   Aliases: T20K12.120                                                                                                                                                                                                                                                          | 10.2 | 9.2  | 1.1  | 3.9   |
| 15659 AT3G55770.5   similar to LIM domain-containing protein [Arabidopsis thaliana] (TAIR:At2g39900.1); similar to LIM domain protein [Gossypium hirsutum] (GB:AAL38006.1); contains InterPro domain Zn-binding protein, LIM (InterPro:IPR001781)   chr3:20714379-20716299 FORWARD   Aliases: F1116.180                                                                                                                                                   | 10.2 | 10.5 | -0.3 | -1.0  |
| 973 AT2G32090.2   lactoylglutathione lyase family protein / glyoxalase I family protein, contains glyoxalase family protein domain, Pfam:PF00903   chr2:13651704-13652906 FORWARD   Aliases: F22D22.16, F22D22_16                                                                                                                                                                                                                                         | 10.2 | 7.0  | 3.2  | 9.6   |
| 5531 AT1G42960.1   expressed protein localized to the inner membrane of the chloroplast.   chr1:16128235-16129727 FORWARD   Aliases: F13A11.2, F13A11_2                                                                                                                                                                                                                                                                                                   | 10.2 | 9.1  | 1.1  | 4.3   |
| 5917 AT5G20570.1   Symbol: RBX1   ring-box protein-related, similar to ring-box protein 1 GI:4769004 from (Homo sapiens)   chr5:6956662-6958313 REVERSE   Aliases: F7C8.160, F7C8_160, HRT1, ROC1                                                                                                                                                                                                                                                         | 10.2 | 9.2  | 1.1  | 4.1   |
| 735 AT4G21620.1   glycine-rich protein   chr4:11491495-11492179 FORWARD   Aliases: F17L22.80, F17L22_80                                                                                                                                                                                                                                                                                                                                                   | 10.2 | 6.4  | 3.8  | 10.6  |
| 11062 AT3G01770.1   DNA-binding bromodomain-containing protein, contains bromodomain, INTERPRO:IPR001487   chr3:275418-278792 REVERSE   Aliases: F28J7.10                                                                                                                                                                                                                                                                                                 | 10.2 | 9.7  | 0.5  | 2.1   |
| 664 AT5G01650.1   macrophage migration inhibitory factor family protein / MIF family protein, contains pfam profile: PF001187 Macrophage migration inhibitory factor   chr5:242547-244096 REVERSE   Aliases: F7A7.170, F7A7_170                                                                                                                                                                                                                           | 10.2 | 7.0  | 3.3  | 10.9  |
| 953 AT5G02610.1   60S ribosomal protein L35 (RPL35D), ribosomal protein L35- cytosolic, Arabidopsis thaliana, PIR:T00549   chr5:587528-588731 FORWARD   Aliases: T22P11.200, T22P11_200                                                                                                                                                                                                                                                                   | 10.2 | 6.9  | 3.3  | 9.7   |
| 3733 AT5G08040.1   expressed protein   chr5:2577203-2578120 REVERSE   Aliases: T22D6.2                                                                                                                                                                                                                                                                                                                                                                    | 10.2 | 8.3  | 1.9  | 5.5   |

|                                                                                                                                                                                                                                                                                                                                   |      |      |      |       |
|-----------------------------------------------------------------------------------------------------------------------------------------------------------------------------------------------------------------------------------------------------------------------------------------------------------------------------------|------|------|------|-------|
| 976 AT1G49970.1   Symbol: CLPR1   ATP-dependent Clp protease proteolytic subunit (ClpR1) (nClpP5), identical to nClpP5 GB:BAA82069 GI:5360595 from (Arabidopsis thaliana); identical to cDNA nClpP5 (nuclear encoded ClpP5) GI:5360594   chr1:18505201-18508277 REVERSE   Aliases: F2J10.14, F2J10_14, NCLPP5                     | 10.2 | 7.7  | 2.5  | 9.6   |
| 11140 AT3G07680.1   emp24/gp25L/p24 family protein, similar to SP:Q15363 Cop-coated vesicle membrane protein p24 precursor (p24A) {Homo sapiens}; contains Pfam profile PF01105: emp24/gp25L/p24 family   chr3:2455308-2456885 FORWARD   Aliases: MLP3.13                                                                         | 10.2 | 9.6  | 0.6  | 2.0   |
| 410 AT5G01530.1   chlorophyll A-B binding protein CP29 (LHCB4), identical to CP29 (Arabidopsis thaliana) GI:298036; contains Pfam profile: PF00504 chlorophyll A-B binding protein                                                                                                                                                | 10.2 | 4.7  | 5.5  | 12.7  |
| 3608 AT5G48570.1   peptidyl-prolyl cis-trans isomerase, putative / FK506-binding protein, putative, similar to rof1 (Arabidopsis thaliana) GI:1373396   chr5:19707768-19711071 REVERSE   Aliases: K15N18.12, K15N18_12                                                                                                            | 10.2 | 8.2  | 2.0  | 5.6   |
| 19356 AT2G25670.2   expressed protein   chr2:10935742-10938135 REVERSE   Aliases: F3N11.12, F3N11_12                                                                                                                                                                                                                              | 10.2 | 10.1 | 0.1  | 0.3   |
| 3438 AT5G03455.1   Symbol: CDC25   rhodanese-like domain-containing protein, contains Rhodanese-like domain PF:00581   chr5:862558-864107 FORWARD   Aliases: ARATH;CDC25                                                                                                                                                          | 10.2 | 9.0  | 1.2  | 5.7   |
| 1876 AT2G37870.1   protease inhibitor/seed storage/lipid transfer protein (LTP) family protein, contains Pfam protease inhibitor/seed storage/LTP family domain PF00234   chr2:15866317-15866985 FORWARD   Aliases: T8P21.22, T8P21_22                                                                                            | 10.2 | 6.6  | 3.7  | 7.6   |
| 14043 AT2G21560.1   expressed protein, contains weak similarity to reticulocyte-binding protein 2 homolog A (Plasmodium falciparum) gi:9754767:gb:AAF98066   chr2:9237348-9238588 REVERSE   Aliases: F2G1.17, F2G1_17                                                                                                             | 10.2 | 9.6  | 0.6  | 1.4   |
| 941 AT5G67220.1   nitrogen regulation family protein, similar to unknown protein (gb:AAF51525.1) ; contains Pfam domain PF01207: Dihydrouridine synthase (Dus); similar to (SP:P45672) NIFR3-like protein (SP:P45672) (Azospirillum brasilense)   chr5:26836684-26839190 REVERSE   Aliases: K21H1.18, K21H1_18                    | 10.2 | 8.3  | 1.9  | 9.7   |
| 3254 AT5G46250.2   RNA recognition motif (RRM)-containing protein, contains similarity to RNA-binding protein; contains InterPro entry IPR000504: RNA-binding region RNP-1 (RNA recognition motif) (RRM)   chr5:18772535-18775505 FORWARD   Aliases: MPL12.3, MPL12_3                                                             | 10.2 | 11.1 | -0.9 | -5.9  |
| 244 AT5G05710.1   pleckstrin homology (PH) domain-containing protein, similar to AtPH1 (Arabidopsis thaliana) GI:5926716; contains Pfam profile PF00169: PH domain                                                                                                                                                                | 10.2 | 5.9  | 4.3  | 15.4  |
| 2005 AT3G14290.1   Symbol: PAE2   20S proteasome alpha subunit E2 (PAE2), identical to 20S proteasome subunit PAE2 GB:AAC32061 from (Arabidopsis thaliana)                                                                                                                                                                        | 10.2 | 8.9  | 1.4  | 7.4   |
| 688 AT3G54260.1   expressed protein, various predicted proteins, Arabidopsis thaliana   chr3:20095988-20097741 REVERSE   Aliases: F24B22.220                                                                                                                                                                                      | 10.2 | 7.7  | 2.5  | 10.8  |
| 209 AT4G30950.1   Symbol: FAD6   omega-6 fatty acid desaturase, chloroplast (FAD6) (FADC), identical to GI:493068                                                                                                                                                                                                                 | 10.2 | 4.5  | 5.7  | 16.4  |
| 5702 AT4G33250.1   Symbol: EIF3K   eukaryotic translation initiation factor 3 subunit 11 / eIF-3 p25 / eIF3k (TIF3K1), identical to Swiss-Prot:Q9SZA3 eukaryotic translation initiation factor 3 subunit 11 (eIF-3 p25) (eIF3k) (Arabidopsis thaliana); identical to cDNA initiation factor 3k GI:12407752                        | 10.2 | 8.3  | 1.9  | 4.2   |
| 2595 AT5G61030.1   RNA-binding protein, putative, similar to RNA-binding protein from (Solanum tuberosum) GI:15822705, (Nicotiana tabacum) GI:15822703, (Nicotiana sylvestris) GI:624925; contains InterPro entry IPR000504: RNA-binding region RNP-1 (RNA recognition motif) (RRM)                                               | 10.2 | 8.3  | 1.9  | 6.6   |
| 523 AT1G54320.1   LEM3 (ligand-effect modulator 3) family protein / CDC50 family protein, Similar to GI:11994416; GI:4966357; GI:4835763; GI:9757735 from (Arabidopsis thaliana)   chr1:20279202-20281624 REVERSE   Aliases: F20D21.14, F20D21_14                                                                                 | 10.2 | 11.9 | -1.7 | -11.8 |
| 5150 AT2G47640.3   small nuclear ribonucleoprotein D2, putative / snRNP core protein D2, putative / Sm protein D2, putative, similar to small nuclear ribonucleoprotein Sm D2 (snRNP core protein D2) (Sm-D2) (Mus musculus) SWISS-PROT:P43330   chr2:19544275-19545669 FORWARD   Aliases: F17A22.3                               | 10.2 | 9.2  | 1.0  | 4.5   |
| 13568 AT3G12580.1   Symbol: HSP70   heat shock protein 70, putative / HSP70, putative, strong similarity to heat shock protein GI:425194 (Spinacia oleracea)   chr3:3991268-3993798 REVERSE   Aliases: HSP70, T2E22.11                                                                                                            | 10.2 | 9.8  | 0.4  | 1.5   |
| 609 AT4G20260.4   similar to DREPP plasma membrane polypeptide-related [Arabidopsis thaliana] (TAIR:At5g44610.1); similar to DREPP2 protein [Nicotiana tabacum] (GB:CAB91552.1); contains InterPro domain DREPP plasma membrane polypeptide (InterPro:IPR008469)   chr4:10940749-10943512 FORWARD   Aliases: F1C12.180, F1C12_180 | 10.2 | 12.2 | -2.0 | -11.2 |
| 1762 AT1G27400.1   60S ribosomal protein L17 (RPL17A), similar to GB:P51413 from (Arabidopsis thaliana); similar to ESTs gb:L33542 and gb:AA660016   chr1:9515122-9516912 FORWARD   Aliases: F17L21.19, F17L21_19                                                                                                                 | 10.2 | 6.6  | 3.5  | 7.8   |
| 1989 AT4G37910.1   Symbol: MTHSC70 1   heat shock protein 70, mitochondrial, putative / HSP70, mitochondrial, putative, strong similarity to SP:Q01899 Heat shock 70 kDa protein, mitochondrial precursor {Phaseolus vulgaris}   chr4:17825074-17828171 REVERSE   Aliases: F20D10.30, F20D10_30, MTHSC70 1                        | 10.2 | 7.7  | 2.5  | 7.4   |

|                                                                                                                                                                                                                                                                                                                                                                                                                                                                          |      |      |      |      |
|--------------------------------------------------------------------------------------------------------------------------------------------------------------------------------------------------------------------------------------------------------------------------------------------------------------------------------------------------------------------------------------------------------------------------------------------------------------------------|------|------|------|------|
| 301 AT3G51820.1   chlorophyll synthetase, putative, identical to gi:972938 putative chlorophyll synthetase from Arabidopsis thaliana   chr3:19226980-19230027 REVERSE   Aliases: ATEM1.7, ATG4                                                                                                                                                                                                                                                                           | 10.2 | 5.6  | 4.6  | 14.3 |
| 12198 AT2G37410.2   Symbol: ATTIM17 2   mitochondrial import inner membrane translocase (TIM17), nearly identical to SP:Q9SP35 Mitochondrial import inner membrane translocase subunit TIM17 {Arabidopsis thaliana}                                                                                                                                                                                                                                                      | 10.2 | 9.3  | 0.8  | 1.8  |
| 1218 AT4G32520.1   glycine hydroxymethyltransferase, putative / serine hydroxymethyltransferase, putative / serine/threonine aldolase, putative, similar to serine hydroxymethyltransferase (Chlamydomonas reinhardtii) GI:17066746; contains Pfam profile PF00464: serine hydroxymethyltransferase                                                                                                                                                                      | 10.2 | 6.7  | 3.5  | 8.9  |
| 512 AT3G44590.2   60S acidic ribosomal protein P2 (RPP2D), acidic ribosomal protein P2, maize, PIR:S54179                                                                                                                                                                                                                                                                                                                                                                | 10.2 | 7.7  | 2.5  | 11.9 |
| 11240 AT1G26850.3   dehydration-responsive family protein, similar to early-responsive to dehydration stress ERD3 protein (Arabidopsis thaliana) GI:15320410; contains Pfam profile PF03141: Putative methyltransferase   chr1:9300860-9304120 REVERSE   Aliases: T2P11.4, T2P11_4                                                                                                                                                                                       | 10.2 | 9.7  | 0.5  | 2.0  |
| 4513 AT4G17520.1   nuclear RNA-binding protein, putative, similar to nuclear RNA binding protein GI:6492264 from (Arabidopsis thaliana)   chr4:9771343-9773605 FORWARD   Aliases: DL4795W, FCAALL.142                                                                                                                                                                                                                                                                    | 10.2 | 8.8  | 1.4  | 4.9  |
| 8684 AT3G57650.1   Symbol: LPAT2   acyl-CoA:1-acylglycerol-3-phosphate acyltransferase, putative, similar to acyl-CoA:1-acylglycerol-3-phosphate acyltransferase GI:4583544 from (Brassica napus)   chr3:21360491-21364151 FORWARD   Aliases: F15B8.160                                                                                                                                                                                                                  | 10.2 | 9.7  | 0.5  | 2.8  |
| 13765 AT4G32870.1   expressed protein, hypothetical protein F17H15.20 Arabidopsis thaliana chromosome II BAC F17H15, PID:g3643606   chr4:15862147-15862745 FORWARD   Aliases: T16I18.80, T16I18_80                                                                                                                                                                                                                                                                       | 10.2 | 9.9  | 0.3  | 1.4  |
| 1447 AT5G50870.1   ubiquitin-conjugating enzyme, putative, strong similarity to ubiquitin conjugating enzyme (Lycopersicon esculentum) GI:886679; contains Pfam profile PF00179: Ubiquitin-conjugating enzyme   chr5:20716709-20718302 REVERSE   Aliases: K3K7.1, K3K7_1                                                                                                                                                                                                 | 10.2 | 6.0  | 4.2  | 8.3  |
| 1211 AT5G61820.1   expressed protein, MtN19, Medicago truncatula, EMBL:MTY15367   chr5:24851544-24853917 REVERSE   Aliases: MAC9.6, MAC9_6                                                                                                                                                                                                                                                                                                                               | 10.2 | 11.8 | -1.6 | -9.0 |
| 4284 AT5G40930.1   Symbol: TOM20 4   mitochondrial import receptor subunit TOM20-4 / translocase of outer membrane 20 kDa subunit 4, identical to mitochondrial import receptor subunit TOM20-4 SP:P82805 from (Arabidopsis thaliana)   chr5:16421688-16423224 FORWARD   Aliases: MMG1.2, MMG1_2, TOM20, TRANSLOCASE OF OUTER MEMBRANE 20 4                                                                                                                              | 10.2 | 8.5  | 1.7  | 5.0  |
| 14065 AT1G22300.3   Symbol: GRF10   14-3-3 protein GF14 epsilon (GRF10), identical to 14-3-3 protein GF14 epsilon GI:5802798, SP:P48347 from (Arabidopsis thaliana)                                                                                                                                                                                                                                                                                                      | 10.2 | 9.4  | 0.7  | 1.4  |
| 436 AT2G30200.2   similar to malonyl-CoA:ACP transacylase [Perilla frutescens] (GB:AAG43518.1); contains InterPro domain Acyl transferase domain (InterPro:IPR001227)   chr2:12890074-12892845 REVERSE   Aliases: T27E13.6, T27E13_6                                                                                                                                                                                                                                     | 10.2 | 5.5  | 4.6  | 12.5 |
| 3678 AT5G14030.1   translocon-associated protein beta (TRAPB) family protein, low similarity to SP:P23438 Translocon-associated protein, beta subunit precursor (TRAP-beta) (Signal sequence receptor beta subunit) {Canis familiaris}; contains Pfam profile PF05753: Translocon-associated protein beta (TRAPB)   chr5:4526813-4528411 FORWARD   Aliases: MUA22.2, MUA22_2                                                                                             | 10.2 | 8.9  | 1.3  | 5.5  |
| 3363 AT4G33510.1   Symbol: DHS2   2-dehydro-3-deoxyphosphoheptonate aldolase 2 / 3-deoxy-D-arabino-heptulosonate 7-phosphate synthase 2 / DAHP synthetase 2 (DHS2), nearly identical to SP:Q00218   chr4:16116450-16118800 FORWARD   Aliases: 3 DEOXY D ARABINO HEPTULOSONATE 7 PHOSPHATE SYNTHASE, F17M5.270, F17M5_270                                                                                                                                                 | 10.2 | 8.8  | 1.4  | 5.8  |
| 10960 AT5G52920.1   pyruvate kinase, putative, similar to pyruvate kinase isozyme G, chloroplast precursor (Nicotiana tabacum) SWISS-PROT:Q40546   chr5:21480769-21484043 FORWARD   Aliases: MXC20.15, MXC20_15                                                                                                                                                                                                                                                          | 10.2 | 9.5  | 0.6  | 2.1  |
| 10742 AT4G20360.1   elongation factor Tu / EF-Tu (TUFA), identical to SWISS-PROT:P17745 elongation factor Tu, chloroplast precursor (EF-Tu) (Arabidopsis thaliana)   chr4:10989963-10991720 FORWARD   Aliases: F9F13.10, F9F13_10                                                                                                                                                                                                                                        | 10.2 | 9.3  | 0.9  | 2.1  |
| 7092 AT2G06050.2   Symbol: OPR3   12-oxophytodienoate reductase (OPR3) / delayed dehiscence1 (DDE1), nearly identical to DELAYED DEHISCENCE1 (GI:7688991) and to OPR3 (GI:10242314); contains Pfam profile PF00724:oxidoreductase, FAD/FMN-binding; identical to cDNA OPDA-reductase homolog GI:5059114   chr2:2359112-2362124 REVERSE   Aliases: 12 OXO PHYTODIENOATE REDUCTASE, 12 OXOPHYTODIENOATE 10,11 REDUCTASE, F5K7.19, F5K7_19                                  | 10.2 | 8.7  | 1.5  | 3.5  |
| 8218 AT4G05390.1   ferredoxin--NADP(+) reductase, putative / adrenodoxin reductase, putative, strong similarity to SP:P41345 Ferredoxin--NADP reductase, root isozyme, chloroplast precursor (EC 1.18.1.2) (FNR) {Oryza sativa}, ferredoxin-NADP reductase precursor (Zea mays) GI:500751   chr4:2738712-2740562 REVERSE   Aliases: C6L9.70, C6L9_70                                                                                                                     | 10.2 | 9.2  | 0.9  | 3.0  |
| 4119 AT3G47520.1   Symbol: MDH   malate dehydrogenase (NAD), chloroplast (MDH), identical to chloroplast NAD-malate dehydrogenase (Arabidopsis thaliana) GI:3256066; contains InterPro entry IPR001236: Lactate/malate dehydrogenase; contains Pfam profiles PF00056: lactate/malate dehydrogenase, NAD binding domain and PF02866: lactate/malate dehydrogenase, alpha/beta C-terminal domain   chr3:17524259-17526026 FORWARD   Aliases: F1P2.70, MALATE DEHYDROGENASE | 10.2 | 8.5  | 1.7  | 5.2  |



|                                                                                                                                                                                                                                                                                                                                                                                                                               |      |      |      |      |
|-------------------------------------------------------------------------------------------------------------------------------------------------------------------------------------------------------------------------------------------------------------------------------------------------------------------------------------------------------------------------------------------------------------------------------|------|------|------|------|
| 12175 AT4G03520.1   Symbol: ATHM2   thioredoxin M-type 2, chloroplast (TRX-M2), nearly identical to SP:Q9SEU8 Thioredoxin M-type 2, chloroplast precursor (TRX-M2) {Arabidopsis thaliana}   chr4:1562357-1564164 REVERSE   Aliases: F9H3.15, F9H3_15, T5L23.1                                                                                                                                                                 | 10.2 | 9.5  | 0.6  | 1.8  |
| 15646 AT1G15690.1   Symbol: AVP1   pyrophosphate-energized vacuolar membrane proton pump / pyrophosphate-energized inorganic pyrophosphatase (AVP-3), identical to pyrophosphate-energized vacuolar membrane proton pump (pyrophosphate-energized inorganic pyrophosphatase) SP:P31414 from (Arabidopsis thaliana)   chr1:5398985-5402949 FORWARD   Aliases: ATAVP3, AVP 3, F7H2.3, F7H2_3, VACUOLAR H+ PYROPHOSPHATASE AVP 3 | 10.2 | 9.8  | 0.4  | 1.0  |
| 3721 AT1G10590.3   DNA-binding protein-related, contains weak similarity to G-quartet DNA binding protein 3 (Tetrahymena thermophila) gi:4583503:gb:AAD25098   chr1:3502051-3503410 REVERSE   Aliases: F20B24.1                                                                                                                                                                                                               | 10.2 | 9.2  | 1.0  | 5.5  |
| 905 AT2G41650.1   expressed protein   chr2:17370985-17371512 FORWARD   Aliases: T32G6.17, T32G6_17                                                                                                                                                                                                                                                                                                                            | 10.2 | 8.1  | 2.1  | 9.9  |
| 2081 AT5G58110.1   expressed protein, predicted proteins, Homo sapiens and Drosophila melanogaster   chr5:23532412-23533860 FORWARD   Aliases: K21L19.11, K21L19_11                                                                                                                                                                                                                                                           | 10.2 | 8.7  | 1.5  | 7.3  |
| 11839 AT2G30620.1   histone H1.2, nearly identical to SP:P26569 Histone H1.2 {Arabidopsis thaliana}   chr2:13052008-13053588 FORWARD   Aliases: T6B20.3, T6B20_3                                                                                                                                                                                                                                                              | 10.2 | 9.7  | 0.5  | 1.9  |
| 1619 AT3G46560.1   Symbol: TIM9   mitochondrial import inner membrane translocase (TIM9), identical to mitochondrial import inner membrane translocase subunit Tim9 (Arabidopsis thaliana) Swiss-Prot:Q9XGX9; contains Pfam domain, PF02953: Tim10/DDP family zinc finger   chr3:17149572-17150473 FORWARD   Aliases: EMB2474, EMBRYO DEFECTIVE 2474, F12A12.80                                                               | 10.2 | 7.6  | 2.6  | 8.0  |
| 5300 AT5G42790.1   Symbol: PAF1   20S proteasome alpha subunit F1 (PAF1), (gb:AAC32062.1)   chr5:17176278-17178298 REVERSE   Aliases: 20S PROTEASOME SUBUNIT PAF1, MJB21.17, MJB21_17, PAF1                                                                                                                                                                                                                                   | 10.1 | 8.1  | 2.1  | 4.4  |
| 295 AT1G73940.1   expressed protein   chr1:27801974-27803248 REVERSE   Aliases: F2P9.19, F2P9_19                                                                                                                                                                                                                                                                                                                              | 10.1 | 5.5  | 4.7  | 14.4 |
| 20948 AT2G29700.1   Symbol: ATPH1   pleckstrin homology (PH) domain-containing protein (PH1), identical to AtPH1 (Arabidopsis thaliana) GI:5926716; contains Pfam profile PF00169: PH domain   chr2:12704497-12705244 FORWARD   Aliases: ARABIDOPSIS THALIANA PLECKSTRIN HOMOLOGUE 1, T27A16.20, T27A16_20                                                                                                                    | 10.1 | 10.2 | -0.0 | -0.0 |
| 7265 AT4G13010.1   oxidoreductase, zinc-binding dehydrogenase family protein, low similarity to probable NADP-dependent oxidoreductase (zeta-crystallin homolog) P1 (SP:Q39172)(gi:886428) and P2 (SP:Q39173)(gi:886430); contains Pfam profile PF00107: oxidoreductase, zinc-binding dehydrogenase family   chr4:7600548-7602726 FORWARD   Aliases: F25G13.100, F25G13_100                                                   | 10.1 | 8.8  | 1.3  | 3.4  |
| 14428 AT4G24330.1   expressed protein, hypothetical protein - Caenorhabditis elegans,PID:e1350884   chr4:12603531-12606338 REVERSE   Aliases: T22A6.160, T22A6_160                                                                                                                                                                                                                                                            | 10.1 | 9.8  | 0.3  | 1.3  |
| 12704 AT1G16890.2   ubiquitin-conjugating enzyme, putative, nearly identical to ubiquitin-conjugating enzyme E2 (Catharanthus roseus) GI:5381319; contains Pfam profile PF00179: Ubiquitin-conjugating enzyme   chr1:5776339-5778448 REVERSE   Aliases: F17F16.19                                                                                                                                                             | 10.1 | 9.5  | 0.6  | 1.7  |
| 12705 AT1G78870.3   similar to ubiquitin-conjugating enzyme, putative [Arabidopsis thaliana] (TAIR:At1g16890.2); similar to ubiquitin-conjugating enzyme E2 [Catharanthus roseus] (GB:AAD42941.1); contains InterPro domain Ubiquitin-conjugating enzymes (InterPro:IPR000608)   chr1:29655348-29657410 FORWARD   Aliases: F9K20.8, F9K20_8                                                                                   | 10.1 | 9.5  | 0.6  | 1.7  |
| 15686 AT1G02305.1   cathepsin B-like cysteine protease, putative, similar to cathepsin B-like cysteine proteinase (Nicotiana rustica) GI:609175; contains Pfam profile PF00112: Papain family cysteine protease   chr1:455778-458124 FORWARD   Aliases: None                                                                                                                                                                  | 10.1 | 10.6 | -0.5 | -1.0 |
| 18116 AT1G21440.1   mutase family protein, similar to carboxyvinyl-carboxyphosphonate phosphorylmutase GB:O49290 from (Arabidopsis thaliana); similar to carboxyphosphoenolpyruvate mutase (GI:47149) (Streptomyces hygroscopicus); contains Prosite PS00161: Isocitrate lyase signature   chr1:7502159-7504140 REVERSE   Aliases: F24J8.7, F24J8_7                                                                           | 10.1 | 9.9  | 0.3  | 0.6  |
| 6310 AT5G26880.1   tRNA/rRNA methyltransferase (SpoU) family protein, low similarity to tRNA (Gm18) methyltransferase (Thermus thermophilus) GI:11079208; contains Pfam profile PF00588: SpoU rRNA Methylase (RNA methyltransferase, TrmH) family   chr5:9457700-9459233 REVERSE   Aliases: F2P16.25, F2P16_25                                                                                                                | 10.1 | 9.5  | 0.6  | 3.9  |
| 5432 AT2G33220.1   expressed protein   chr2:14085948-14087213 FORWARD   Aliases: F25I18.4, F25I18_4                                                                                                                                                                                                                                                                                                                           | 10.1 | 9.0  | 1.2  | 4.3  |
| 435 AT1G31230.1   bifunctional aspartate kinase/homoserine dehydrogenase / AK-HSDH, nearly identical to gb:X71364 (PIR:S46497) aspartate kinase / homoserine dehydrogenase from Arabidopsis thaliana; contains ACT domain                                                                                                                                                                                                     | 10.1 | 6.5  | 3.7  | 12.5 |
| 20458 AT1G64950.1   Symbol: CYP89A5   cytochrome P450, putative, similar to cytochrome P450 89A2 (CYPLXXXIX) (SP:Q42602) (Arabidopsis thaliana);similar to cytochrome P450 (GI:438242) (Solanum melongena)   chr1:24131224-24133121 FORWARD   Aliases: F13O11.25, F13O11_25                                                                                                                                                   | 10.1 | 10.1 | 0.0  | 0.1  |

|                                                                                                                                                                                                                                                                                                                                                                                                                                                                                                                                                                                                                                                                                                     |      |      |      |      |
|-----------------------------------------------------------------------------------------------------------------------------------------------------------------------------------------------------------------------------------------------------------------------------------------------------------------------------------------------------------------------------------------------------------------------------------------------------------------------------------------------------------------------------------------------------------------------------------------------------------------------------------------------------------------------------------------------------|------|------|------|------|
| 1047 AT4G22570.1   adenine phosphoribosyltransferase, putative, strong similarity to Adenine phosphoribosyltransferase ( <i>Hordeum vulgare</i> subsp. <i>vulgare</i> ) GI:9711921; contains Pfam profile PF00156: Phosphoribosyl transferase domain   chr4:11882161-11885414 REVERSE   Aliases: F7K2.150, F7K2_150                                                                                                                                                                                                                                                                                                                                                                                 | 10.1 | 6.2  | 3.9  | 9.4  |
| 2821 AT4G01850.1   S-adenosylmethionine synthetase 2 (SAM2), identical to S-adenosylmethionine synthetase 2 (Methionine adenosyltransferase 2, AdoMet synthetase 2) ( <i>Arabidopsis thaliana</i> ) SWISS-PROT:P17562   chr4:796097-798285 REVERSE   Aliases: T7B11.11, T7B11_11                                                                                                                                                                                                                                                                                                                                                                                                                    | 10.1 | 11.5 | -1.3 | -6.3 |
| 5593 AT5G51040.2   expressed protein, contains InterPro domain Protein of unknown function DUF339 (InterPro:IPR005631)   chr5:20767886-20769250 FORWARD   Aliases: K3K7.22, K3K7_22                                                                                                                                                                                                                                                                                                                                                                                                                                                                                                                 | 10.1 | 9.1  | 1.0  | 4.2  |
| 3747 AT3G20500.1   calcineurin-like phosphoesterase family protein, contains Pfam profile: PF00149 calcineurin-like phosphoesterase                                                                                                                                                                                                                                                                                                                                                                                                                                                                                                                                                                 | 10.1 | 8.3  | 1.8  | 5.4  |
| 2643 AT5G02790.1   In2-1 protein, putative, similar to In2-1, <i>Zea mays</i> , EMBL:X58573                                                                                                                                                                                                                                                                                                                                                                                                                                                                                                                                                                                                         | 10.1 | 6.3  | 3.8  | 6.5  |
| 4847 AT3G25230.1   Symbol: ROF1   peptidyl-prolyl cis-trans isomerase / FK506-binding protein (ROF1), identical to rotamase FKBP (ROF1) GB:U49453 ( <i>Arabidopsis thaliana</i> ) (Mol. Gen. Genet. 252 (5), 510-517 (1996))   chr3:9189444-9192642 FORWARD   Aliases: MJL12.21, ROTAMASE FKBP 1                                                                                                                                                                                                                                                                                                                                                                                                    | 10.1 | 7.9  | 2.2  | 4.7  |
| 843 AT2G28000.1   Symbol: CPN60A                                                                                                                                                                                                                                                                                                                                                                                                                                                                                                                                                                                                                                                                    | 10.1 | 7.3  | 2.9  | 10.1 |
| 9632 AT4G13180.1   short-chain dehydrogenase/reductase (SDR) family protein, similar to short-chain type dehydrogenase/reductase SP:Q08632 ( <i>Picea abies</i> )   chr4:7657192-7658193 REVERSE   Aliases: F17N18.70, F17N18_70                                                                                                                                                                                                                                                                                                                                                                                                                                                                    | 10.1 | 8.0  | 2.1  | 2.5  |
| 2700 AT2G18230.1   inorganic pyrophosphatase (soluble) (PPA) / pyrophosphate phospho-hydrolase / PPase, nearly identical to SP:P21216 Soluble inorganic pyrophosphatase (EC 3.6.1.1) (Pyrophosphate phospho- hydrolase) (PPase) { <i>Arabidopsis thaliana</i> }   chr2:7939009-7941411 REVERSE   Aliases: T30D6.26, T30D6_26                                                                                                                                                                                                                                                                                                                                                                        | 10.1 | 5.5  | 4.6  | 6.5  |
| 1471 AT4G01150.1   expressed protein   chr4:493548-494795 FORWARD   Aliases: F2N1.18, F2N1_18                                                                                                                                                                                                                                                                                                                                                                                                                                                                                                                                                                                                       | 10.1 | 6.7  | 3.4  | 8.3  |
| 11164 AT1G79230.1   Symbol: ST1   mercaptopyruvate sulfurtransferase (MST1) (RDH1), identical to mercaptopyruvate sulfurtransferase GI:6009981 and thiosulfate sulfurtransferase GI:5834508 from ( <i>Arabidopsis thaliana</i> )   chr1:29805586-29808832 FORWARD   Aliases: ARABIDOPSIS THALIANA RHODANESE HOMOLOGUE 1, ATMST1, ATRDH1, MERCAPTOPYRUVATE SULFURTRANSFERASE, MERCAPTOPYRUVATE SULFURTRANSFERASE 1, MST1, YUP8H12R.17, YUP8H12R_17                                                                                                                                                                                                                                                   | 10.1 | 8.5  | 1.6  | 2.0  |
| 696 AT2G44860.1   60S ribosomal protein L24, putative   chr2:18507444-18509617 REVERSE   Aliases: T13E15.13                                                                                                                                                                                                                                                                                                                                                                                                                                                                                                                                                                                         | 10.1 | 6.7  | 3.4  | 10.7 |
| 3429 AT4G18730.1   Symbol: RPL16B                                                                                                                                                                                                                                                                                                                                                                                                                                                                                                                                                                                                                                                                   | 10.1 | 8.0  | 2.1  | 5.7  |
| 3430 AT5G45775.2   60S ribosomal protein L11 (RPL11D)   chr5:18582292-18583785 REVERSE   Aliases: None                                                                                                                                                                                                                                                                                                                                                                                                                                                                                                                                                                                              | 10.1 | 8.0  | 2.1  | 5.7  |
| 15457 AT3G10770.2   expressed protein   chr3:3372275-3374276 REVERSE   Aliases: T7M13.15                                                                                                                                                                                                                                                                                                                                                                                                                                                                                                                                                                                                            | 10.1 | 9.8  | 0.3  | 1.1  |
| 8064 AT3G06050.1   Symbol: ATPRXIIF/PRXIIF   Encodes a mitochondrial matrix localized peroxiredoxin involved in redox homeostasis. Knockout mutants have reduced root growth under certain oxidative stress conditions.   chr3:1826160-1827867 REVERSE   Aliases: ATPRXIIF, F24F17.3, F24F17_3, PRXIIF                                                                                                                                                                                                                                                                                                                                                                                              | 10.1 | 7.7  | 2.4  | 3.1  |
| 18418 AT1G29470.2   similar to dehydration-responsive protein-related [ <i>Arabidopsis thaliana</i> ] (TAIR:At5g64030.1); similar to dehydration-responsive protein-related [ <i>Arabidopsis thaliana</i> ] (TAIR:At3g51070.1); similar to dehydration-responsive protein-related [ <i>Arabidopsis thaliana</i> ] (TAIR:At2g34300.1); similar to OSJNBb0020J19.14 [ <i>Oryza sativa</i> ( <i>japonica</i> cultivar-group)] (GB:XP_474482.1); similar to ankyrin-like protein [ <i>Oryza sativa</i> ( <i>japonica</i> cultivar-group)] (GB:BAD82580.1); contains InterPro domain Putative methyltransferase DUF248 (InterPro:IPR004159)   chr1:10310231-10313741 REVERSE   Aliases: F15D2.5, F15D2_5 | 10.1 | 10.0 | 0.1  | 0.5  |
| 354 AT1G53460.1   expressed protein   chr1:19958158-19960300 REVERSE   Aliases: T3F20.22, T3F20_22                                                                                                                                                                                                                                                                                                                                                                                                                                                                                                                                                                                                  | 10.1 | 7.1  | 3.0  | 13.5 |
| 479 AT3G58700.1   60S ribosomal protein L11 (RPL11B), ribosomal protein L11, cytosolic, <i>Arabidopsis thaliana</i> , PIR:S49033   chr3:21722540-21723930 FORWARD   Aliases: T20N10.50                                                                                                                                                                                                                                                                                                                                                                                                                                                                                                              | 10.1 | 7.7  | 2.4  | 12.1 |
| 2212 AT3G07910.1   expressed protein   chr3:2523163-2524171 REVERSE   Aliases: F17A17.25                                                                                                                                                                                                                                                                                                                                                                                                                                                                                                                                                                                                            | 10.1 | 8.5  | 1.6  | 7.1  |
| 8517 AT1G80460.2   Symbol: NHO1   similar to glycerol kinase [ <i>Pandanus amaryllifolius</i> ] (GB:AAR88660.1); contains InterPro domain Carbohydrate kinase, FGGY (InterPro:IPR000577); contains InterPro domain Glycerol kinase (InterPro:IPR005999)   chr1:30251637-30254197 REVERSE   Aliases: GLI1, T21F11.21, T21F11_21                                                                                                                                                                                                                                                                                                                                                                      | 10.1 | 10.8 | -0.7 | -2.9 |
| 537 AT5G48870.1   Symbol: SAD1   small nuclear ribonucleoprotein, putative / snRNP, putative / Sm protein, putative, similar to U6 snRNA-associated Sm-like protein LSm5 ( <i>Homo sapiens</i> ) SWISS-PROT:Q9Y4Y9                                                                                                                                                                                                                                                                                                                                                                                                                                                                                  | 10.1 | 8.2  | 1.9  | 11.7 |
| 7461 AT1G16240.2   Symbol: SYP51   similar to syntaxin 52 (SYP52) [ <i>Arabidopsis thaliana</i> ] (TAIR:At1g79590.1); similar to putative syntaxin of plants 52 [ <i>Oryza sativa</i> ( <i>japonica</i> cultivar-group)] (GB:XP_463898.1); contains InterPro domain Target SNARE coiled-coil domain (InterPro:IPR000727)   chr1:5555001-5556797 REVERSE   Aliases: ATSYP51, F3O9.4, F3O9_4, SYNTAXIN OF PLANTS 51                                                                                                                                                                                                                                                                                   | 10.1 | 10.7 | -0.6 | -3.3 |

|                   |                                                                                                                                                                                                                                                                                                                                                                                                     |      |      |      |      |
|-------------------|-----------------------------------------------------------------------------------------------------------------------------------------------------------------------------------------------------------------------------------------------------------------------------------------------------------------------------------------------------------------------------------------------------|------|------|------|------|
| 5912 AT3G11710.1  | lysyl-tRNA synthetase, putative / lysine--tRNA ligase, putative, similar to SP:Q43776 Lysyl-tRNA synthetase (EC 6.1.1.6) (Lysine--tRNA ligase) {Lycopersicon esculentum}; contains Pfam profile PF00152: tRNA synthetases class II (D, K and N)   chr3:3702179-3705707 REVERSE   Aliases: T19F11.11, T19F11_11                                                                                      | 10.1 | 9.1  | 0.9  | 4.1  |
| 7815 AT5G59150.1  | Ras-related GTP-binding protein, putative, similar to Ras-related protein Rab11C SP:Q40193 from (Lotus japonicus)   chr5:23893835-23895655 FORWARD   Aliases: MNC17.6, MNC17_6                                                                                                                                                                                                                      | 10.1 | 10.5 | -0.4 | -3.2 |
| 2922 AT2G27710.3  | 60S acidic ribosomal protein P2 (RPP2B)   chr2:11823868-11824944 FORWARD   Aliases: F15K20.19, F15K20_19                                                                                                                                                                                                                                                                                            | 10.1 | 7.6  | 2.5  | 6.2  |
| 9894 AT4G34050.2  | coffeoyl-CoA 3-O-methyltransferase, putative, nearly identical to GI:2960356 (Populus balsamifera subsp. trichocarpa), GI:684942 (Medicago sativa subsp. sativa) isoform contains a GT-TG intron which removes an internal segment of the protein.   chr4:16310820-16311978 FORWARD   Aliases: F28A23.190, F28A23_190                                                                               | 10.1 | 11.1 | -1.0 | -2.4 |
| 10610 AT1G14610.1 | Symbol: TWN2   valyl-tRNA synthetase / valine--tRNA ligase (VALRS), nearly identical to SP:P93736 Valyl-tRNA synthetase (EC 6.1.1.9) (Valine--tRNA ligase) (ValRS) {Arabidopsis thaliana}   chr1:5008239-5014512 REVERSE   Aliases: T5E21.11, T5E21_11, TWIN 2, VALRS, VALYL TRNA SYNTHETASE                                                                                                        | 10.1 | 9.5  | 0.6  | 2.2  |
| 9829 AT5G65620.1  | peptidase M3 family protein / thimet oligopeptidase family protein, similar to SP:P27237 Oligopeptidase A (EC 3.4.24.70) {Salmonella typhimurium}; contains Pfam profile PF01432: Peptidase family M3   chr5:26239174-26243549 FORWARD   Aliases: K21L13.14, K21L13_14                                                                                                                              | 10.1 | 9.3  | 0.7  | 2.4  |
| 6592 AT5G55290.1  | ATP synthase subunit H family protein, contains weak similarity to Vacuolar ATP synthase subunit H (EC 3.6.3.14) (V-ATPase H subunit) (Vacuolar proton pump H subunit) (V-ATPase M9.2 subunit) (V-ATPase 9.2 kDa membrane accessory protein) (Swiss-Prot:P81103) (Bos taurus); contains Pfam profile PF05493: ATP synthase subunit H   chr5:22440263-22441312 REVERSE   Aliases: MCO15.24, MCO15_24 | 10.1 | 9.5  | 0.6  | 3.7  |
| 1028 AT3G02180.2  | Symbol: SP1L   expressed protein   chr3:404891-405656 FORWARD   Aliases: F1C9.3, SPIRAL 1 LIKE                                                                                                                                                                                                                                                                                                      | 10.1 | 8.1  | 2.0  | 9.5  |
| 8820 AT3G13070.1  | CBS domain-containing protein / transporter associated domain-containing protein, similar to SP:Q54318 Hemolysin C (Serpulina hyodysenteriae) {Treponema hyodysenteriae}; contains Pfam profiles PF00571: CBS domain, PF03471: Transporter associated domain, PF01595: Domain of unknown function   chr3:4191518-4195119 REVERSE   Aliases: MJG19.2                                                 | 10.1 | 9.3  | 0.8  | 2.8  |
| 3659 AT1G74270.1  | 60S ribosomal protein L35a (RPL35aC), similar to ribosomal protein L33B GB:NP_014877 from (Saccharomyces cerevisiae)   chr1:27931917-27933158 REVERSE   Aliases: F1O17.6, F1O17_6                                                                                                                                                                                                                   | 10.1 | 8.1  | 2.0  | 5.5  |
| 1566 AT3G52090.1  | Symbol: ATRPB13.6   DNA-directed RNA polymerase II 13.6 kDa subunit (RPB13.6), identical to SP:Q38859 DNA-directed RNA polymerase II 13.6 kDa polypeptide (EC 2.7.7.6) {Arabidopsis thaliana}   chr3:19328832-19330030 REVERSE   Aliases: F4F15.200, RNA POLYMERASE II 13.6 KDA SUBUNIT                                                                                                             | 10.1 | 8.0  | 2.1  | 8.1  |
| 3743 AT1G16310.1  | cation efflux family protein, contains cation efflux family protein domain, Pfam:PF01545                                                                                                                                                                                                                                                                                                            | 10.1 | 7.0  | 3.1  | 5.5  |
| 859 AT1G14980.1   | Symbol: CPN10   10 kDa chaperonin (CPN10), identical to SP:P34893 from (Arabidopsis thaliana)   chr1:5165623-5166740 REVERSE   Aliases: CHAPERONIN 10, MITOCHONDRIAL CHAPERONIN 10, T15D22.2, T15D22_2                                                                                                                                                                                              | 10.1 | 6.9  | 3.2  | 10.1 |
| 3986 AT3G55620.1  | Symbol: EMB1624   eukaryotic translation initiation factor 6, putative / eIF-6, putative, similar to SP:O55135 Eukaryotic translation initiation factor 6 (eIF-6) (B4 integrin interactor) {Mus musculus}; contains Pfam profile PF01912: eIF-6 family   chr3:20645182-20647485 FORWARD   Aliases: EMB1624, EMBRYO DEFECTIVE 1624, F1I16.30                                                         | 10.1 | 8.2  | 1.9  | 5.3  |
| 622 AT3G13860.1   | chaperonin, putative, similar to SWISS-PROT:P29197- chaperonin CPN60, mitochondrial precursor (HSP60) (Arabidopsis thaliana) ; contains Pfam:PF00118 domain, TCP-1/cpn60 chaperonin family   chr3:4561524-4565256 REVERSE   Aliases: MCP4.9                                                                                                                                                         | 10.1 | 7.1  | 3.0  | 11.1 |
| 3020 AT3G47470.1  | Symbol: CAB4   chlorophyll A-B binding protein 4, chloroplast / LHCI type III CAB-4 (CAB4), identical to SP:P27521 Chlorophyll A-B binding protein 4, chloroplast precursor (LHCI type III CAB-4) (LHCP) {Arabidopsis thaliana}                                                                                                                                                                     | 10.1 | 6.5  | 3.6  | 6.1  |
| 11235 AT1G04750.2 | Symbol: VAMP7B                                                                                                                                                                                                                                                                                                                                                                                      | 10.1 | 9.0  | 1.1  | 2.0  |
| 5910 AT1G74210.1  | glycerophosphoryl diester phosphodiesterase family protein, low similarity to glycerophosphodiester phosphodiesterase (Borrelia hermsii) GI:1399038; contains Pfam profile PF03009: Glycerophosphoryl diester phosphodiesterase family   chr1:27913979-27916602 FORWARD   Aliases: F1O17.12, F1O17_12                                                                                               | 10.1 | 8.7  | 1.3  | 4.1  |
| 13687 AT2G34690.1 | Symbol: ACD11   expressed protein   chr2:14637430-14639029 FORWARD   Aliases: ACCELERATED CELL DEATH 11, T29F13.10, T29F13_10                                                                                                                                                                                                                                                                       | 10.1 | 9.8  | 0.2  | 1.4  |
| 5265 AT3G25520.1  | Symbol: ATL5   60S ribosomal protein L5, similar to 60S ribosomal protein L5 GB:P49625 from (Oryza sativa)   chr3:9270524-9272626 REVERSE   Aliases: A. THALIANA RIBOSOMAL PROTEIN L5, MWL2.17, RIBOSOMAL PROTEIN L5                                                                                                                                                                                | 10.1 | 7.7  | 2.4  | 4.4  |
| 7016 AT5G61510.1  | NADP-dependent oxidoreductase, putative, similar to zeta-crystallin homolog TED2 from Zinnia elegans (gi:531096); contains Pfam zinc-binding dehydrogenase domain PF00107   chr5:24754171-24756224 REVERSE   Aliases: K11J9.5, K11J9_5                                                                                                                                                              | 10.1 | 8.8  | 1.3  | 3.5  |



|                                                                                                                                                                                                                                                                                                                                                                                                                                                                                          |      |      |      |      |
|------------------------------------------------------------------------------------------------------------------------------------------------------------------------------------------------------------------------------------------------------------------------------------------------------------------------------------------------------------------------------------------------------------------------------------------------------------------------------------------|------|------|------|------|
| 5681 ATCG00080.1   Symbol: PSBI   PSII I protein   chrC:7583-7693 FORWARD   Aliases: PSBI                                                                                                                                                                                                                                                                                                                                                                                                | 10.1 | 7.3  | 2.8  | 4.2  |
| 5755 AT5G01410.1   stress-responsive protein, putative, similar to ethylene-inducible protein HEVER (Hevea brasiliensis) SWISS-PROT:Q39963   chr5:172317-173613 REVERSE   Aliases: T1008.120, T1008_120                                                                                                                                                                                                                                                                                  | 10.1 | 7.9  | 2.2  | 4.2  |
| 831 AT3G02870.2   similar to inositol monophosphatase family protein [Arabidopsis thaliana] (TAIR:At1g31190.1); similar to L-galactose-1-phosphate phosphatase [Malus x domestica] (GB:AAV49507.1); contains InterPro domain Inositol monophosphatase (InterPro:IPR000760)                                                                                                                                                                                                               | 10.0 | 7.7  | 2.3  | 10.1 |
| 3606 AT4G22212.1   Encodes a defensin-like (DEFL) family protein.   chr4:11753998-11754700 FORWARD   Aliases: None                                                                                                                                                                                                                                                                                                                                                                       | 10.0 | 11.4 | -1.4 | -5.6 |
| 18487 AT5G48930.1   transferase family protein, similar to anthranilate N-hydroxycinnamoyl/benzoyltransferase from Dianthus caryophyllus (GI:3288180, GI:2239091); contains Pfam profile PF02458 transferase family   chr5:19853525-19855371 REVERSE   Aliases: K19E20.4, K19E20_4                                                                                                                                                                                                       | 10.0 | 10.3 | -0.3 | -0.5 |
| 14177 AT3G17810.1   dihydroorotate dehydrogenase family protein / dihydroorotate oxidase family protein, low similarity to SP:Q12882 Dihydropyrimidine dehydrogenase (NADP+) precursor (EC 1.3.1.2) (DPD) (DHPDHase) (Dihydrouracil dehydrogenase) (Dihydrothymine dehydrogenase) {Homo sapiens}; contains Pfam profile PF01180: Dihydroorotate dehydrogenase   chr3:6094157-6096572 FORWARD   Aliases: MEB5.3                                                                           | 10.0 | 9.0  | 1.0  | 1.3  |
| 7527 AT2G18390.1   Symbol: TTN5   ADP-ribosylation factor-like protein 2 (ARL2), identical to ARL2 G-protein (Halimasch; HAL; TITAN5) GI:20514265 from (Arabidopsis thaliana); identical to cDNA ARL2 G-protein mRNA GI:20514264; contains Pfam profile PF00025: ADP-ribosylation factor family; contains TIGRfam profile TIGR00231: small GTP-binding protein domain   chr2:7995247-7996943 FORWARD   Aliases: ARG1 LIKE 2, ARL2, ATARLC1, HAL, HALLIMASCH, T30D6.10, T30D6_10, TITAN 5 | 10.0 | 9.5  | 0.5  | 3.3  |
| 6043 AT3G15640.1   cytochrome c oxidase family protein, contains Pfam domain, PF01215: Cytochrome c oxidase subunit Vb   chr3:5299117-5301752 FORWARD   Aliases: MSJ11.5                                                                                                                                                                                                                                                                                                                 | 10.0 | 9.1  | 1.0  | 4.0  |
| 9606 AT4G30600.1   signal recognition particle receptor alpha subunit family protein, similar to Signal recognition particle receptor alpha subunit (SR-alpha) (Docking protein alpha) (DP-alpha) (SP:P08240) (Homo sapiens); similar to Signal recognition particle receptor alpha subunit                                                                                                                                                                                              | 10.0 | 10.6 | -0.5 | -2.5 |
| 815 AT1G23220.1   dynein light chain type 1 family protein, similar to SP:O02414 Dynein light chain LC6, flagellar outer arm {Anthocidaris crassispina}; contains Pfam profile PF01221: Dynein light chain type 1   chr1:8242499-8244307 FORWARD   Aliases: F26F24.7, F26F24_7                                                                                                                                                                                                           | 10.0 | 6.6  | 3.4  | 10.2 |
| 827 AT2G35040.1   AICARFT/IMPCHase bienzyme family protein, similar to SP:P12048 Bifunctional purine biosynthesis protein purH (Includes: Phosphoribosylaminoimidazolecarboxamide formyltransferase (EC 2.1.2.3) (AICAR transformylase); IMP cyclohydrolase (EC 3.5.4.10) (Inosinicase) (IMP synthetase) (ATIC)) {Bacillus subtilis}; contains Pfam profiles PF01808: AICARFT/IMPCHase bienzyme, PF02142: MGS-like domain   chr2:14772239-14775367 REVERSE   Aliases: F19I3.27, F19I3_27 | 10.0 | 5.1  | 4.9  | 10.2 |
| 14485 AT3G08710.1   thioredoxin family protein, similar to thioredoxin H-type GB:P29448 SP:P29448 (Arabidopsis thaliana), Thioredoxin H-type 2 (TRX-H2) SP:Q07090 {Nicotiana tabacum}; contains Pfam profile: PF00085 Thioredoxin   chr3:2645223-2646496 FORWARD   Aliases: F17O14.18                                                                                                                                                                                                    | 10.0 | 9.6  | 0.4  | 1.3  |
| 7881 AT5G54855.1   pollen Ole e 1 allergen and extensin family protein, contains Pfam domain, PF01190: Pollen proteins Ole e I family   chr5:22300026-22301613 FORWARD   Aliases: None                                                                                                                                                                                                                                                                                                   | 10.0 | 10.5 | -0.4 | -3.2 |
| 1729 AT3G22320.1   Symbol: ATRPABC24.3   DNA-directed RNA polymerase, putative, similar to SP:P19388 DNA-directed RNA polymerase II 23 kDa polypeptide (EC 2.7.7.6) {Homo sapiens}; contains Pfam profiles PF03871: RNA polymerase Rpb5 N-terminal domain, PF01191: RNA polymerase Rpb5 C-terminal domain   chr3:7890893-7892330 REVERSE   Aliases: MCB17.20                                                                                                                             | 10.0 | 8.2  | 1.8  | 7.8  |
| 17445 AT3G15610.1   transducin family protein / WD-40 repeat family protein, contains 7 WD-40 repeats (PF00400); similar to serine/threonine kinase receptor associated protein GB:NP_035629 (SP:Q9Z1Z2) (Mus musculus); UNR-interacting protein GB:NP_009109 (Homo sapiens)                                                                                                                                                                                                             | 10.0 | 10.1 | -0.1 | -0.7 |
| 10341 NA                                                                                                                                                                                                                                                                                                                                                                                                                                                                                 | 10.0 | 10.5 | -0.4 | -2.3 |
| 2290 AT1G54690.1   histone H2A, putative, strong similarity to histone H2A GI:3204129 SP:O65759 from Cicer arietinum, Picea abies SP:P35063; contains Pfam profile PF00125 Core histone H2A/H2B/H3/H4   chr1:20417983-20418954 REVERSE   Aliases: T22H22.12, T22H22_12                                                                                                                                                                                                                   | 10.0 | 6.4  | 3.6  | 7.0  |
| 5248 AT5G50460.1   protein transport protein SEC61 gamma subunit, putative, similar to Swiss-Prot:Q19967 protein transport protein SEC61 gamma subunit (Caenorhabditis elegans)   chr5:20568663-20569792 REVERSE   Aliases: MBA10.8                                                                                                                                                                                                                                                      | 10.0 | 7.9  | 2.1  | 4.4  |
| 17758 AT2G30950.1   Symbol: VAR2   FtsH protease (VAR2), identical to zinc dependent protease VAR2 GI:7650138 from (Arabidopsis thaliana)   chr2:13181402-13184300 FORWARD   Aliases: F7F1.16, F7F1_16, FTSH2, VAR2, VARIEGATED 2, YELLOW VARIEGATED                                                                                                                                                                                                                                     | 10.0 | 10.2 | -0.2 | -0.6 |
| 6466 AT1G08110.4   similar to lactoylglutathione lyase, putative / glyoxalase I, putative [Arabidopsis thaliana] (TAIR:At1g67280.1); similar to Glyoxalase I [Cicer arietinum] (GB:CAA12028.1); contains InterPro domain Glyoxalase I (InterPro:IPR004361); contains InterPro domain Glyoxalase/Bleomycin resistance protein/dioxygenase domain (InterPro:IPR004360)   chr1:2535368-2537928 FORWARD   Aliases: T6D22.20, T6D22_20                                                        | 10.0 | 7.8  | 2.2  | 3.8  |

|                                                                                                                                                                                                                                                                                                                                                                                                                                                                                                                                           |      |      |      |      |
|-------------------------------------------------------------------------------------------------------------------------------------------------------------------------------------------------------------------------------------------------------------------------------------------------------------------------------------------------------------------------------------------------------------------------------------------------------------------------------------------------------------------------------------------|------|------|------|------|
| 10327 AT2G47320.1   peptidyl-prolyl cis-trans isomerase cyclophilin-type family protein, contains Pfam domain, PF00160: peptidyl-prolyl cis-trans isomerase, cyclophilin-type   chr2:19434442-19435987 FORWARD   Aliases: T8I13.16                                                                                                                                                                                                                                                                                                        | 10.0 | 8.9  | 1.1  | 2.3  |
| 20619 AT4G10840.2   kinesin light chain-related, low similarity to kinesin light chain ( <i>Plectonema boryanum</i> ) GI:2645229; contains Pfam profile PF00515 TPR Domain   chr4:6656512-6659252 FORWARD   Aliases: F25I24.50, F25I24_50                                                                                                                                                                                                                                                                                                 | 10.0 | 10.0 | 0.0  | 0.1  |
| 4215 AT2G22860.1   Symbol: ATPSK2                                                                                                                                                                                                                                                                                                                                                                                                                                                                                                         | 10.0 | 8.9  | 1.2  | 5.1  |
| 11985 AT1G63460.1   glutathione peroxidase, putative, contains Pfam profile: PF00255 glutathione peroxidases                                                                                                                                                                                                                                                                                                                                                                                                                              | 10.0 | 9.7  | 0.3  | 1.8  |
| 396 AT3G30775.1   Symbol: ERD5   proline oxidase, mitochondrial / osmotic stress-responsive proline dehydrogenase (POX) (PRO1) (ERD5), nearly identical to SP:P92983 Proline oxidase, mitochondrial precursor (EC 1.5.3.-) (Osmotic stress- induced proline dehydrogenase) ( <i>Arabidopsis thaliana</i> ); identical to cDNA proline oxidase precursor GI:1817543                                                                                                                                                                        | 10.0 | 6.5  | 3.5  | 12.9 |
| 5787 AT3G45970.1   Symbol: ATEXLA1   expansin family protein (EXPL1), similar to cim1 induced allergen, Glycine max, EMBL:U03860; expansin-like gene, PMID:11641069, www.bio.psu.edu/expansins   chr3:16907151-16908293 FORWARD   Aliases: ARABIDOPSIS THALIANA EXPANSIN LIKE A1, ATEXPL1, ATHEXP BETA 2.1, EXPL1, F16L2.180, F16L2_180                                                                                                                                                                                                   | 10.0 | 10.7 | -0.8 | -4.1 |
| 767 AT5G16710.1   dehydroascorbate reductase, putative, Strong similarity to dehydroascorbate reductase ( <i>Spinacia oleracea</i> ) gi:10952512 gb:AAG24945   chr5:5483291-5485069 FORWARD   Aliases: F5E19.50, F5E19_50                                                                                                                                                                                                                                                                                                                 | 10.0 | 7.2  | 2.8  | 10.4 |
| 14779 AT1G16210.1   expressed protein, ESTs gb:T04357 and gb:AA595092 come from this gene   chr1:5546127-5547546 REVERSE   Aliases: F3O9.2, F3O9_2                                                                                                                                                                                                                                                                                                                                                                                        | 10.0 | 9.5  | 0.5  | 1.2  |
| 1772 AT5G53400.1   nuclear movement family protein, contains Pfam profile: PF03593 nuclear movement protein                                                                                                                                                                                                                                                                                                                                                                                                                               | 10.0 | 6.7  | 3.3  | 7.8  |
| 14896 AT1G02840.3   Symbol: SR1   pre-mRNA splicing factor SF2 (SF2) / SR1 protein, identical to SP:O22315 Pre-mRNA splicing factor SF2 (SR1 protein) { <i>Arabidopsis thaliana</i> }   chr1:626741-629819 FORWARD   Aliases: ATSRP34, F22D16.16, F22D16_16, SRP34                                                                                                                                                                                                                                                                        | 10.0 | 9.8  | 0.2  | 1.2  |
| 786 AT3G06310.1   NADH-ubiquinone oxidoreductase 19 kDa subunit (NDUFA8) family protein, contains Pfam profile PF05850: NADH-ubiquinone oxidoreductase 19 kDa subunit (NDUFA8); similar to NADH-ubiquinone oxidoreductase 19 kDa subunit (EC 1.6.5.3) (EC 1.6.99.3) (Complex I-19KD) (CI-19KD) (Complex I-PGIV) (CI-PGIV) (Swiss-Prot:P51970) ( <i>Homo sapiens</i> )   chr3:1912978-1914387 REVERSE   Aliases: F24P17.23, F24P17_23                                                                                                      | 10.0 | 8.0  | 2.0  | 10.3 |
| 90 AT4G03210.2   Symbol: XTH9   similar to xyloglucan:xyloglucosyl transferase / xyloglucan endotransglycosylase / endo-xyloglucan transferase (EXGT-A4) [ <i>Arabidopsis thaliana</i> ] (TAIR:At5g13870.1); similar to sadtomato protein [ <i>Capsicum annuum</i> ] (GB:AAS77347.1); contains InterPro domain Glycoside hydrolase, family 16 (InterPro:IPR000757); contains InterPro domain Beta-glucanase (InterPro:IPR008264)   chr4:1415953-1417352 FORWARD   Aliases: F4C21.14, F4C21_14, XYLOGLUCAN ENDOTRANGLUCOSYLASE/HYDROLASE 9 | 10.0 | 4.1  | 5.9  | 21.2 |
| 1552 AT1G28350.1   similar to tRNA synthetase class I (W and Y) family protein [ <i>Arabidopsis thaliana</i> ] (TAIR:At2g33840.1); similar to putative tyrosyl-tRNA synthetase [ <i>Oryza sativa</i> ( <i>japonica</i> cultivar-group)] (GB:XP_480120.1); contains InterPro domain Aminoacyl-tRNA synthetase, class Ib (InterPro:IPR002305)   chr1:9944470-9949786 FORWARD   Aliases: F3M18.22, F3M18_22                                                                                                                                  | 10.0 | 7.5  | 2.5  | 8.1  |
| 1553 AT2G33840.1   tRNA synthetase class I (W and Y) family protein, similar to SP:P54577 Tyrosyl-tRNA synthetase (EC 6.1.1.1) (Tyrosyl--tRNA ligase) (TyrRS) { <i>Homo sapiens</i> }; contains Pfam profile PF00579: tRNA synthetases class I (W and Y)   chr2:14322044-14324575 FORWARD   Aliases: T1B8.14, T1B8_14                                                                                                                                                                                                                     | 10.0 | 7.5  | 2.5  | 8.1  |
| 8794 AT4G23650.1   Symbol: CDPK6   calcium-dependent protein kinase, putative / CDPK, putative, similar to calcium-dependent protein kinase ( <i>Marchantia polymorpha</i> ) gi:5162877:dbj:BAA81748; contains protein kinase domain, Pfam:PF00069; contains EF hand domain (calcium-binding EF-hand), Pfam:PF00036, INTERPRO:IPR002048   chr4:12324779-12327469 REVERSE   Aliases: CALCIUM DEPENDENT PROTEIN KINASE 6, CPK3, F9D16.120, F9D16_120                                                                                        | 10.0 | 9.3  | 0.7  | 2.8  |
| 1079 AT4G02510.1   Symbol: TOC159                                                                                                                                                                                                                                                                                                                                                                                                                                                                                                         | 10.0 | 8.2  | 1.8  | 9.3  |
| 11707 AT5G41520.1   40S ribosomal protein S10 (RPS10B), contains similarity to 40S ribosomal protein S10   chr5:16626419-16627889 REVERSE   Aliases: MBK23.4, MBK23_4                                                                                                                                                                                                                                                                                                                                                                     | 10.0 | 9.4  | 0.6  | 1.9  |
| 16690 AT5G56630.1   phosphofructokinase family protein, similar to phosphofructokinase ( <i>Amycolatopsis methanolica</i> ) GI:17432243; contains Pfam profile PF00365: Phosphofructokinase   chr5:22941148-22944189 FORWARD   Aliases: MIK19.8, MIK19_8                                                                                                                                                                                                                                                                                  | 10.0 | 9.7  | 0.3  | 0.8  |
| 1367 AT3G18130.1   guanine nucleotide-binding family protein / activated protein kinase C receptor (RACK1), identical to guanine nucleotide-binding protein; activated protein kinase C receptor; RACK1 (GI:9294068) { <i>Arabidopsis thaliana</i> }; contains Pfam profile: PF00400 WD domain, G-beta repeat (7 copies)   chr3:6210912-6212439 REVERSE   Aliases: MRC8.11                                                                                                                                                                | 10.0 | 6.2  | 3.7  | 8.5  |
| 16119 AT5G20660.1   24 kDa vacuolar protein, putative, similar to 24 kDa vacuolar protein VP24 ( <i>Ipomoea batatas</i> ) gi:5821406:dbj:BAA83809   chr5:6986237-6991045 FORWARD   Aliases: T1M15.60, T1M15_60                                                                                                                                                                                                                                                                                                                            | 10.0 | 10.1 | -0.2 | -0.9 |

|                                                                                                                                                                                                                                                                                                                                                                                                                                                                                                                         |      |      |      |      |
|-------------------------------------------------------------------------------------------------------------------------------------------------------------------------------------------------------------------------------------------------------------------------------------------------------------------------------------------------------------------------------------------------------------------------------------------------------------------------------------------------------------------------|------|------|------|------|
| 5723 AT1G21720.1   Symbol: PBC1   20S proteasome beta subunit C1 (PBC1) (PRCT), almost identical to GB: AAC32069 from ( <i>Arabidopsis thaliana</i> ), EST gb:T76747 comes from this gene; identical to cDNA proteasome subunit prct GI:2511567   chr1:7626272-7628251 FORWARD   Aliases: 20S PROTEASOME BETA SUBUNIT PBC1, F8K7.15, F8K7_15                                                                                                                                                                            | 10.0 | 6.1  | 3.9  | 4.2  |
| 7845 AT1G36980.1   expressed protein   chr1:14027484-14029382 FORWARD   Aliases: T32E20.29, T32E20_29                                                                                                                                                                                                                                                                                                                                                                                                                   | 10.0 | 10.5 | -0.5 | -3.2 |
| 1583 AT3G05060.1   SAR DNA-binding protein, putative, strong similarity to SAR DNA-binding protein-1 ( <i>Pisum sativum</i> ) GI:3132696; contains Pfam profile PF01798: Putative snoRNA binding domain; encodes NOP58-like protein   chr3:1412873-1415958 REVERSE   Aliases: T12H1.2, T12H1_2                                                                                                                                                                                                                          | 10.0 | 7.9  | 2.1  | 8.1  |
| 2697 AT4G02930.1   elongation factor Tu, putative / EF-Tu, putative, similar to mitochondrial elongation factor Tu ( <i>Arabidopsis thaliana</i> ) gi:1149571:emb:CAA61511   chr4:1295409-1298397 REVERSE   Aliases: T4I9.19                                                                                                                                                                                                                                                                                            | 10.0 | 7.1  | 2.9  | 6.5  |
| 16958 AT1G06760.1   histone H1, putative, similar to histone H1-1 GB:CAA44312 GI:16314 from ( <i>Arabidopsis thaliana</i> ); identical to cDNA H1-1C mRNA for histone H1-1 (partial) GI:732560   chr1:2076503-2077697 REVERSE   Aliases: F4H5.15, F4H5_15                                                                                                                                                                                                                                                               | 10.0 | 10.2 | -0.2 | -0.8 |
| 6098 AT1G16700.1   NADH-ubiquinone oxidoreductase 23 kDa subunit, mitochondrial, putative, very strong similarity to SP:Q42599 NADH-ubiquinone oxidoreductase 23 kDa subunit, mitochondrial precursor (EC 1.6.5.3) (EC 1.6.99.3) (Complex I-23KD) (CI-23KD) (Complex I- 28.5KD) (CI-28.5KD) { <i>Arabidopsis thaliana</i> }; contains Pfam profile PF00037: iron-sulfur cluster-binding protein   chr1:5709718-5711889 FORWARD   Aliases: F19K19.1, F19K19_1                                                            | 10.0 | 6.9  | 3.1  | 4.0  |
| 6099 AT1G79010.1   NADH-ubiquinone oxidoreductase 23 kDa subunit, mitochondrial (TYKY), identical to SP:Q42599 NADH-ubiquinone oxidoreductase 23 kDa subunit, mitochondrial precursor (EC 1.6.5.3) (EC 1.6.99.3) (Complex I-23KD) (CI-23KD) (Complex I- 28.5KD) (CI-28.5KD) { <i>Arabidopsis thaliana</i> }   chr1:29729814-29731910 REVERSE   Aliases: YUP8H12R.37, YUP8H12R_37                                                                                                                                        | 10.0 | 6.9  | 3.1  | 4.0  |
| 8406 AT4G24470.2   Symbol: ZIM   zinc finger (GATA type) protein ZIM (ZIM), identical to zinc-finger protein expressed in Inflorescence Meristem, ZIM gi:8918533 from ( <i>Arabidopsis thaliana</i> )   chr4:12645600-12647950 FORWARD   Aliases: T22A6.300, T22A6_300                                                                                                                                                                                                                                                  | 10.0 | 8.9  | 1.0  | 2.9  |
| 506 AT1G24735.1   caffeoyl-CoA 3-O-methyltransferase, putative, similar to SP:Q43237 ( <i>Vitis vinifera</i> ), GI:684942 ( <i>Medicago sativa</i> subsp. <i>sativa</i> )   chr1:8758685-8759434 FORWARD   Aliases: F5A9.20, F5A9_20                                                                                                                                                                                                                                                                                    | 10.0 | 4.9  | 5.1  | 11.9 |
| 3683 AT4G27500.1   Symbol: PPI1   expressed protein, non-consensus GA donor splice site at exon 6   chr4:13743178-13745906 FORWARD   Aliases: F27G19.100, F27G19_100, PROTON PUMP INTERACTOR 1                                                                                                                                                                                                                                                                                                                          | 10.0 | 11.3 | -1.3 | -5.5 |
| 901 AT3G25220.1   Symbol: FKBP15 1   FK506-binding protein 2-1 (FKBP15-1) / immunophilin / peptidyl-prolyl cis-trans isomerase / rotamase, identical to SP:Q38935 FK506-binding protein 2-1 precursor (EC 5.2.1.8) (Peptidyl-prolyl cis- trans isomerase) (PPIase) (Rotamase) (15 kDa FKBP) (FKBP-15-1) { <i>Arabidopsis thaliana</i> }, immunophilin (FKBP15-1) GB:U52046 ( <i>Arabidopsis thaliana</i> ) (Proc. Natl. Acad. Sci. U.S.A. 93 (14), 6964-6969 (1996))   chr3:9183855-9185849 FORWARD   Aliases: MJL12.19 | 9.9  | 8.3  | 1.7  | 9.9  |
| 38 AT2G21330.3   similar to fructose-bisphosphate aldolase, putative [ <i>Arabidopsis thaliana</i> ] (TAIR:At4g38970.1); similar to plastidic aldolase NPALDP1 [ <i>Nicotiana paniculata</i> ] (GB:BAA77604.1); similar to latex plastidic aldolase-like protein [ <i>Hevea brasiliensis</i> ] (GB:AAM46780.1); contains InterPro domain Fructose-bisphosphate aldolase, class-I (InterPro:IPR000741)   chr2:9135228-9137293 REVERSE   Aliases: F3K23.9, F3K23_9                                                        | 9.9  | 2.7  | 7.3  | 27.3 |
| 12138 AT1G80780.2   CCR4-NOT transcription complex protein, putative, similar to SWISS-PROT:Q60809 CCR4-NOT transcription complex, subunit 7 (CCR4-associated factor 1, (CAF1) ( <i>Mus musculus</i> )   chr1:30363007-30364265 FORWARD   Aliases: F23A5.13, F23A5_13                                                                                                                                                                                                                                                   | 9.9  | 10.4 | -0.4 | -1.8 |
| 6329 AT4G38740.1   Symbol: ROC1   peptidyl-prolyl cis-trans isomerase / cyclophilin / rotamase / cyclosporin A-binding protein (ROC1), identical to SP:P34790 Peptidyl-prolyl cis-trans isomerase (EC 5.2.1.8) (PPIase) (Rotamase) (Cyclophilin) (Cyclosporin A-binding protein) { <i>Arabidopsis thaliana</i> }   chr4:18083389-18084245 REVERSE   Aliases: CYCLOPHILIN, T9A14.20, T9A14_20                                                                                                                            | 9.9  | 6.7  | 3.2  | 3.8  |
| 1361 AT3G01690.1   expressed protein   chr3:256562-258554 FORWARD   Aliases: F4P13.23, F4P13_23                                                                                                                                                                                                                                                                                                                                                                                                                         | 9.9  | 11.6 | -1.6 | -8.6 |
| 17678 AT5G67600.1   expressed protein   chr5:26976797-26977535 REVERSE   Aliases: K9I9.17, K9I9_17                                                                                                                                                                                                                                                                                                                                                                                                                      | 9.9  | 10.2 | -0.2 | -0.6 |
| 12942 AT3G57280.1   expressed protein, contains Pfam profile PF03647: Uncharacterised protein family (UPF0136)   chr3:21204820-21206695 FORWARD   Aliases: F28O9.130                                                                                                                                                                                                                                                                                                                                                    | 9.9  | 9.6  | 0.3  | 1.6  |
| 4103 AT5G47620.3   heterogeneous nuclear ribonucleoprotein, putative / hnRNP, putative   chr5:19319496-19321316 REVERSE   Aliases: MNJ7.21, MNJ7_21                                                                                                                                                                                                                                                                                                                                                                     | 9.9  | 10.8 | -0.9 | -5.2 |
| 1127 AT4G25740.2   similar to 40S ribosomal protein S10 (RPS10C) [ <i>Arabidopsis thaliana</i> ] (TAIR:At5g52650.1); similar to RS10_ORYSA 40S ribosomal protein S10 (GB:Q9AYP4); contains InterPro domain Plectin/S10, N-terminal (InterPro:IPR005326)   chr4:13107273-13108822 REVERSE   Aliases: F14M19.20, F14M19_20                                                                                                                                                                                                | 9.9  | 7.2  | 2.7  | 9.2  |
| 19896 AT1G51680.2   Symbol: 4CL1   4-coumarate--CoA ligase 1 / 4-coumaroyl-CoA synthase 1 (4CL1), identical to SP:Q42524 4-coumarate--CoA ligase 1 (EC 6.2.1.12) (4CL1) (4-coumaroyl-CoA synthase 1) { <i>Arabidopsis thaliana</i> }   chr1:19163097-19165220 REVERSE   Aliases: 4 COUMARATE:COA LIGASE, 4 COUMARATE:COA LIGASE 1, 4CL.1, AT4CL1, F19C24.11, F19C24_11                                                                                                                                                  | 9.9  | 9.8  | 0.2  | 0.2  |



|                                                                                                                                                                                                                                                                                                                                                                                                                                                                                                                                                                                             |     |      |      |      |
|---------------------------------------------------------------------------------------------------------------------------------------------------------------------------------------------------------------------------------------------------------------------------------------------------------------------------------------------------------------------------------------------------------------------------------------------------------------------------------------------------------------------------------------------------------------------------------------------|-----|------|------|------|
| 3048 AT1G50200.1   Symbol: ALATS   aminoacyl-tRNA synthetase family protein, contains Pfam profiles: PF01411 tRNA synthetases class II (A), PF02272 DHHA1 domain   chr1:18594882-18602149 REVERSE   Aliases: ACD, ALANYL TRNA SYNTHETASE, ALARS, F14I3.17, F14I3_17                                                                                                                                                                                                                                                                                                                         | 9.9 | 10.9 | -1.0 | -6.1 |
| 4648 AT3G43520.1   expressed protein, contains Pfam profile PF03647: Uncharacterised protein family (UPF0136)   chr3:15417012-15418896 FORWARD   Aliases: T18D12.90                                                                                                                                                                                                                                                                                                                                                                                                                         | 9.9 | 8.3  | 1.6  | 4.8  |
| 18066 AT1G01550.2   Symbol: BPS1   similar to expressed protein [Arabidopsis thaliana] (TAIR:At2g46080.1); similar to OSJNBa0018M05.6 [Oryza sativa (japonica cultivar-group)] (GB:XP_474319.1)   chr1:199792-201775 FORWARD   Aliases: BYPASS 1, F22L4.9, F22L4_9                                                                                                                                                                                                                                                                                                                          | 9.9 | 10.1 | -0.2 | -0.6 |
| 51 AT4G38970.2   fructose-bisphosphate aldolase, putative, strong similarity to plastidic fructose-bisphosphate aldolase (EC 4.1.2.13) from Nicotiana paniculata (NPALDP1) (GI:4827251), Oryza sativa, PIR2:T02057 (SP:Q40677)   chr4:18163490-18165734 REVERSE   Aliases: F19H22.70, F19H22_70                                                                                                                                                                                                                                                                                             | 9.9 | 3.8  | 6.2  | 25.6 |
| 14118 AT2G16710.1   hesB-like domain-containing protein, similar to IscA (putative iron-sulfur cluster assembly protein) (Azotobacter vinelandii) GI:2271523; contains Pfam profile PF01521: HesB-like domain   chr2:7255255-7257367 FORWARD   Aliases: T24I21.12, T24I21_12                                                                                                                                                                                                                                                                                                                | 9.9 | 9.5  | 0.4  | 1.4  |
| 3428 AT4G25130.1   peptide methionine sulfoxide reductase, putative, strong similarity to SP:P54151 Peptide methionine sulfoxide reductase (EC 1.8.4.6) {Brassica napus}; contains Pfam profile PF01625: Peptide methionine sulfoxide reductase   chr4:12898603-12900074 REVERSE   Aliases: F24A6.2                                                                                                                                                                                                                                                                                         | 9.9 | 6.8  | 3.2  | 5.7  |
| 10159 AT1G64850.1   calcium-binding EF hand family protein, contains INTERPRO:IPR002048 calcium-binding EF-hand domain   chr1:24100098-24101271 REVERSE   Aliases: F13O11.15, F13O11_15                                                                                                                                                                                                                                                                                                                                                                                                     | 9.9 | 9.6  | 0.3  | 2.3  |
| 4329 AT3G13845.1   expressed protein   chr3:4557333-4558586 REVERSE   Aliases: None                                                                                                                                                                                                                                                                                                                                                                                                                                                                                                         | 9.9 | 8.7  | 1.2  | 5.0  |
| 16676 AT3G19640.1   magnesium transporter CorA-like family protein (MRS2-3), low similarity to SP:Q01926 RNA splicing protein MRS2, mitochondrial precursor {Saccharomyces cerevisiae}; contains Pfam profile PF01544: CorA-like Mg2+ transporter protein   chr3:6820936-6823312 FORWARD   Aliases: MMB12.11                                                                                                                                                                                                                                                                                | 9.9 | 9.7  | 0.2  | 0.8  |
| 2106 AT2G44310.1   calcium-binding EF hand family protein, contains INTERPRO:IPR002048 calcium-binding EF-hand domain   chr2:18316288-18316902 FORWARD   Aliases: F4I1.12                                                                                                                                                                                                                                                                                                                                                                                                                   | 9.9 | 7.5  | 2.3  | 7.2  |
| 16741 AT4G27750.1   expressed protein   chr4:13841694-13843639 FORWARD   Aliases: T29A15.240, T29A15_240                                                                                                                                                                                                                                                                                                                                                                                                                                                                                    | 9.9 | 9.6  | 0.3  | 0.8  |
| 9213 AT2G47470.3   Symbol: ATPDIL2 1   similar to thioredoxin family protein [Arabidopsis thaliana] (TAIR:At2g32920.1); similar to thioredoxin family protein [Arabidopsis thaliana] (TAIR:At1g04980.1); similar to protein disulfide-isomerase precursor [Nicotiana tabacum] (GB:CAA72092.1); contains InterPro domain Disulphide isomerase (InterPro:IPR005788); contains InterPro domain Thioredoxin type domain (InterPro:IPR006662); contains InterPro domain Thioredoxin domain 2 (InterPro:IPR006663)   chr2:19488492-19491085 FORWARD   Aliases: ATPDIL2 1, PDI LIKE 2 1, T30B22.23 | 9.9 | 8.8  | 1.1  | 2.6  |
| 406 AT1G48350.1   ribosomal protein L18 family protein, similar to ribosomal protein L18 GI:3980238 from (Thermotoga maritima)   chr1:17870876-17872010 FORWARD   Aliases: F11A17.10, F11A17_10                                                                                                                                                                                                                                                                                                                                                                                             | 9.9 | 5.7  | 4.2  | 12.8 |
| 13837 AT3G11930.4   similar to universal stress protein (USP) family protein [Arabidopsis thaliana] (TAIR:At3g58450.1); similar to putative ethylene-responsive protein [Oryza sativa (japonica cultivar-group)] (GB:AAP53941.1); contains InterPro domain Usp domain (InterPro:IPR006016); contains InterPro domain Universal stress protein (Usp) (InterPro:IPR006015)   chr3:3776265-3777700 FORWARD   Aliases: MEC18.3                                                                                                                                                                  | 9.9 | 10.2 | -0.3 | -1.4 |
| 96 AT4G24040.1   Symbol: ATTRE1                                                                                                                                                                                                                                                                                                                                                                                                                                                                                                                                                             | 9.9 | 3.8  | 6.0  | 21.1 |
| 18295 AT5G49540.1   expressed protein, contains Pfam profile PF05646: Protein of unknown function (DUF786)   chr5:20121810-20123334 REVERSE   Aliases: K6M13.9, K6M13_9                                                                                                                                                                                                                                                                                                                                                                                                                     | 9.9 | 9.8  | 0.1  | 0.5  |
| 716 AT2G33800.1   ribosomal protein S5 family protein, contains Pfam profiles PF03719: Ribosomal protein S5, C-terminal domain, PF00333: Ribosomal protein S5, N-terminal domain   chr2:14307848-14309506 REVERSE   Aliases: T1B8.10, T1B8_10                                                                                                                                                                                                                                                                                                                                               | 9.9 | 7.4  | 2.5  | 10.7 |
| 6376 AT4G02580.1   NADH-ubiquinone oxidoreductase 24 kDa subunit, putative, similar to NADH-ubiquinone oxidoreductase 24 kDa subunit, mitochondrial precursor (EC 1.6.5.3) (EC 1.6.99.3) (Polypeptide II) (Swiss-Prot:P04394) (Bos taurus)   chr4:1134494-1137156 FORWARD   Aliases: T10P11.14, T10P11_14                                                                                                                                                                                                                                                                                   | 9.9 | 7.2  | 2.7  | 3.8  |
| 8779 AT2G01350.2   quinolinate phosphoribosyl transferase family protein, contains Pfam profile: PF01729 quinolinate phosphoribosyl transferase, C-terminal domain   chr2:165145-167246 REVERSE   Aliases: F10A8.23, F10A8_23                                                                                                                                                                                                                                                                                                                                                               | 9.9 | 9.3  | 0.6  | 2.8  |
| 7565 AT1G30230.1   elongation factor 1-beta / EF-1-beta, identical to SP:P48006 Elongation factor 1-beta (EF-1-beta) {Arabidopsis thaliana}                                                                                                                                                                                                                                                                                                                                                                                                                                                 | 9.9 | 8.2  | 1.7  | 3.3  |
| 7566 AT2G18110.1   elongation factor 1-beta, putative / EF-1-beta, putative, nearly identical to eEF-1beta (Arabidopsis thaliana) GI:398606                                                                                                                                                                                                                                                                                                                                                                                                                                                 | 9.9 | 8.2  | 1.7  | 3.3  |

|                                                                                                                                                                                                                                                                                              |     |      |      |      |
|----------------------------------------------------------------------------------------------------------------------------------------------------------------------------------------------------------------------------------------------------------------------------------------------|-----|------|------|------|
| 20049 AT1G60940.2   serine/threonine protein kinase, putative, similar to serine/threonine-protein kinase ASK1 from (Arabidopsis thaliana), SWISS-PROT:P43291   chr1:22442804-22445882 REVERSE   Aliases: T7P1.8, T7P1_8                                                                     | 9.9 | 9.9  | -0.1 | -0.2 |
| 14253 NA                                                                                                                                                                                                                                                                                     | 9.9 | 9.0  | 0.8  | 1.3  |
| 1003 AT2G37760.3   aldo/keto reductase family protein, similar to chalcone reductase (Sesbania rostrata)(GI:2792155), and aldose reductase ALDRXV4 (Xerophyta viscosa)(GI:4539944), (Hordeum vulgare)(GI:728592)   chr2:15838948-15840909 FORWARD   Aliases: T8P21.6                         | 9.9 | 6.7  | 3.2  | 9.5  |
| 19811 AT4G31180.2   aspartyl-tRNA synthetase, putative / aspartate--tRNA ligase, putative, similar to Aspartyl-tRNA synthetase (Aspartate--tRNA ligase) (AspRS) (Homo sapiens) GI:20178330   chr4:15155916-15159568 FORWARD   Aliases: F6E21.100, F6E21_100                                  | 9.9 | 9.9  | -0.0 | -0.2 |
| 11100 AT2G21160.1   translocon-associated protein alpha (TRAP alpha) family protein, contains Pfam profile: PF03896 translocon-associated protein (TRAP), alpha subunit   chr2:9075412-9077508 FORWARD   Aliases: F26H11.8, F26H11_8                                                         | 9.9 | 9.1  | 0.7  | 2.0  |
| 3268 AT5G23900.1   60S ribosomal protein L13 (RPL13D)   chr5:8064016-8065520 REVERSE   Aliases: MRO11.6, MRO11_6                                                                                                                                                                             | 9.9 | 8.0  | 1.9  | 5.8  |
| 2538 AT1G75270.1   dehydroascorbate reductase, putative, similar to GI:6939839 from (Oryza sativa)   chr1:28253736-28255010 REVERSE   Aliases: F22H5.1, F22H5_1                                                                                                                              | 9.9 | 7.7  | 2.2  | 6.6  |
| 17402 AT5G65430.2   Symbol: GRF8   14-3-3 protein GF14 kappa (GRF8), identical to 14-3-3 protein GF14 kappa GI:5802794, SP:P48348 from (Arabidopsis thaliana)   chr5:26165427-26167568 REVERSE   Aliases: GF14 KAPPA, GF14 KAPPA ISOFORM, MNA5.16, MNA5_16                                   | 9.9 | 10.2 | -0.4 | -0.7 |
| 5812 AT5G42890.1   sterol carrier protein 2 (SCP-2) family protein, similar to sterol carrier protein-2 (Homo sapiens) GI:432973; contains Pfam profile PF02036: SCP-2 sterol transfer family   chr5:17211500-17213260 REVERSE   Aliases: MBD2.8, MBD2_8                                     | 9.9 | 8.7  | 1.1  | 4.1  |
| 930 AT4G14320.1   60S ribosomal protein L36a/L44 (RPL36aB)                                                                                                                                                                                                                                   | 9.9 | 7.8  | 2.1  | 9.8  |
| 16704 AT1G62790.2   protease inhibitor/seed storage/lipid transfer protein (LTP) family protein, contains Pfam protease inhibitor/seed storage/LTP family domain PF00234   chr1:23256003-23257547 FORWARD   Aliases: F23N19.16, F23N19_16                                                    | 9.9 | 9.6  | 0.2  | 0.8  |
| 7907 AT5G63850.1   Symbol: AAP4   amino acid transporter 4, putative (AAP4), identical to amino acid transporter GI:608671 from (Arabidopsis thaliana);   chr5:25568281-25570746 FORWARD   Aliases: MGI19.6, MGI19_6                                                                         | 9.8 | 6.6  | 3.2  | 3.2  |
| 5735 AT5G43850.1   acireductone dioxygenase (ARD/ARD') family protein, similar to iron-deficiency induced gene (Hordeum vulgare) GI:14522834, SIPL (Homo sapiens) GI:16551383; contains Pfam profile PF03079: ARD/ARD' family   chr5:17644412-17646385 REVERSE   Aliases: MQD19.21, MQD19_21 | 9.8 | 9.0  | 0.9  | 4.2  |
| 805 AT2G30140.1   UDP-glucuronosyl/UDP-glucosyl transferase family protein, contains Pfam profile: PF00201 UDP-glucuronosyl and UDP-glucosyl transferase   chr2:12879211-12880897 FORWARD   Aliases: T27E13.12, T27E13_12                                                                    | 9.8 | 7.1  | 2.8  | 10.2 |
| 2999 AT3G03160.1   expressed protein   chr3:729775-730474 FORWARD   Aliases: T17B22.15, T17B22_15                                                                                                                                                                                            | 9.8 | 8.8  | 1.1  | 6.1  |
| 8696 AT4G02450.1   glycine-rich protein, similar to several proteins containing a tandem repeat region such as Plasmodium falciparum GGM tandem repeat protein (GB:U27807)   chr4:1073774-1075878 REVERSE   Aliases: T14P8.5, T14P8_5                                                        | 9.8 | 9.3  | 0.6  | 2.8  |
| 19425 ATCG00490.1   Symbol: RBCL   large subunit of RUBISCO.   chrC:54958-56397 FORWARD   Aliases: RBCL                                                                                                                                                                                      | 9.8 | 9.6  | 0.2  | 0.3  |
| 7886 AT3G62600.1   DNAJ heat shock family protein, similar to DnaJ homolog subfamily B member 11 precursor (SP:Q99KV1){Mus musculus}; contains Pfam PF00226: DnaJ domain; contains PfaPF01556: DnaJ C terminal regionm   chr3:23161766-23164486 REVERSE   Aliases: F26K9.30                  | 9.8 | 8.7  | 1.1  | 3.2  |
| 17288 AT3G29075.1   glycine-rich protein   chr3:11052726-11053931 REVERSE   Aliases: MRI12.9                                                                                                                                                                                                 | 9.8 | 9.5  | 0.3  | 0.7  |
| 6480 AT5G09650.1   inorganic pyrophosphatase family protein, similar to SP:Q15181 Inorganic pyrophosphatase (EC 3.6.1.1) (Pyrophosphate {Homo sapiens}); contains Pfam profile PF00719: inorganic pyrophosphatase   chr5:2991156-2993214 REVERSE   Aliases: F17I14.160, F17I14_160           | 9.8 | 8.5  | 1.4  | 3.8  |
| 510 AT3G49470.1   nascent polypeptide-associated complex (NAC) domain-containing protein, similar to alpha-NAC, non-muscle form (Mus musculus) GI:1666690; contains Pfam profile PF01849: NAC domain   chr3:18351974-18353459 FORWARD   Aliases: T9C5.70                                     | 9.8 | 5.8  | 4.0  | 11.9 |
| 1759 AT3G63250.2   Symbol: ATHMT 2/HMT 2   homocysteine S-methyltransferase 2 (HMT-2), 99.7% identical to homocysteine S-methyltransferase AtHMT-2 (GI:6685163) (Arabidopsis thaliana)   chr3:23381313-23383591 REVERSE   Aliases: ATHMT 2, F16M2.100, HMT 2                                 | 9.8 | 7.6  | 2.3  | 7.8  |
| 169 AT4G17600.1   Symbol: LIL3:1                                                                                                                                                                                                                                                             | 9.8 | 3.2  | 6.7  | 17.2 |
| 15234 AT1G21770.1   expressed protein   chr1:7651635-7652275 REVERSE   Aliases: F8K7.21, F8K7_21                                                                                                                                                                                             | 9.8 | 9.5  | 0.4  | 1.1  |

|                                                                                                                                                                                                                                                                                                                                                                                                                                                                                                                                                                                                                                                                            |     |      |      |       |
|----------------------------------------------------------------------------------------------------------------------------------------------------------------------------------------------------------------------------------------------------------------------------------------------------------------------------------------------------------------------------------------------------------------------------------------------------------------------------------------------------------------------------------------------------------------------------------------------------------------------------------------------------------------------------|-----|------|------|-------|
| 4285 AT1G62180.1   Symbol: APR2   5'-adenylylsulfate reductase 2, chloroplast (APR2) (APSR) / adenosine 5'-phosphosulfate 5'-adenylylsulfate (APS) sulfotransferase 2 / 3'-phosphoadenosine-5'-phosphosulfate (PAPS) reductase homolog 43 (PRH-43), identical to SP:P92981 5'-adenylylsulfate reductase 2, chloroplast precursor (EC 1.8.4.9) (Adenosine 5'-phosphosulfate 5'-adenylylsulfate sulfotransferase 2) (APS sulfotransferase 2) (Thioredoxin independent APS reductase 2) (3'-phosphoadenosine-5'-phosphosulfate reductase homolog 43) (PAPS reductase homolog 43) (Prh-43) {Arabidopsis thaliana}; identical to cDNA PAPS reductase homolog (PRH43) GI:1710115 | 9.8 | 8.4  | 1.5  | 5.0   |
| 7999 AT3G61860.1   Symbol: ATRSP31   arginine/serine-rich splicing factor RSP31 (RSP31), identical to SP:P92964 Arginine/serine-rich splicing factor RSP31 {Arabidopsis thaliana}   chr3:22911047-22913309 REVERSE   Aliases: ARGININE/SERINE RICH SPLICING FACTOR, F21F14.30                                                                                                                                                                                                                                                                                                                                                                                              | 9.8 | 10.6 | -0.7 | -3.1  |
| 425 AT5G23020.1   Symbol: MAM L   2-isopropylmalate synthase 2 (IMS2), identical to 2-isopropylmalate synthase (IMS2) (Arabidopsis thaliana) GI:12330689   chr5:7718206-7721842 FORWARD   Aliases: 2 ISOPROPYLMALATE SYNTHASE 2, IMS2, METHYLTHIOALKYMALATE SYNTHASE LIKE, MYJ24.1, MYJ24_1                                                                                                                                                                                                                                                                                                                                                                                | 9.8 | 11.1 | -1.3 | -12.6 |
| 10719 AT2G16860.1   GCIP-interacting family protein, similar to GCIP-interacting protein mp29 (GI:27372623) (Mus musculus); similar to GCIP-interacting protein P29 (GI:11967379) (Homo sapiens)   chr2:7311002-7313735 REVERSE   Aliases: F12A24.4, F12A24_4                                                                                                                                                                                                                                                                                                                                                                                                              | 9.8 | 9.3  | 0.5  | 2.2   |
| 5923 AT3G24200.2   similar to putative oxygenase [Oryza sativa (japonica cultivar-group)] (GB:XP_470364.1); contains InterPro domain Flavoprotein monooxygenase (InterPro:IPR000733); contains InterPro domain NAD-binding site (InterPro:IPR000205); contains InterPro domain Aromatic-ring hydroxylase (InterPro:IPR003042); contains InterPro domain UbiH/COQ6 monooxygenase (InterPro:IPR000689)   chr3:8747838-8751376 REVERSE   Aliases: MUJ8.10                                                                                                                                                                                                                     | 9.8 | 8.4  | 1.4  | 4.1   |
| 1398 AT1G17880.1   nascent polypeptide-associated complex (NAC) domain-containing protein / BTF3b-like transcription factor, putative, similar to SP:P20290 Transcription factor BTF3 (RNA polymerase B transcription factor 3) {Homo sapiens}; contains Pfam profile PF01849: NAC domain; identical to cDNA BTF3b-like factor GI:5912423   chr1:6152420-6153946 REVERSE   Aliases: F2H15.11, F2H15_11                                                                                                                                                                                                                                                                     | 9.8 | 6.4  | 3.4  | 8.5   |
| 3674 AT5G58930.1   expressed protein, contains Pfam PF05340: Protein of unknown function (DUF740)   chr5:23811541-23813687 REVERSE   Aliases: K19M22.12, K19M22_12                                                                                                                                                                                                                                                                                                                                                                                                                                                                                                         | 9.8 | 9.2  | 0.7  | 5.5   |
| 11743 AT1G64720.1   Symbol: CP5   expressed protein, weak similarity to SP:P53809 Phosphatidylcholine transfer protein (PC-TP) {Rattus norvegicus}   chr1:24050216-24052261 REVERSE   Aliases: CP5, F13O11.4, F13O11_4                                                                                                                                                                                                                                                                                                                                                                                                                                                     | 9.8 | 9.2  | 0.6  | 1.9   |
| 19695 AT5G47200.1   Ras-related GTP-binding protein, putative, similar to GTP-binding protein GI:303750 from (Pisum sativum)                                                                                                                                                                                                                                                                                                                                                                                                                                                                                                                                               | 9.8 | 9.7  | 0.1  | 0.3   |
| 2888 AT1G12200.1   flavin-containing monooxygenase family protein / FMO family protein, low similarity to FMO2 from Homo sapiens (SP:Q99518); contains Pfam profile: PF00743 Flavin-binding monooxygenase-like   chr1:4137531-4140026 FORWARD   Aliases: T28K15.7, T28K15_7                                                                                                                                                                                                                                                                                                                                                                                                | 9.8 | 7.5  | 2.3  | 6.3   |
| 703 AT2G25720.1   expressed protein   chr2:10962597-10963130 REVERSE   Aliases: F3N11.17, F3N11_17                                                                                                                                                                                                                                                                                                                                                                                                                                                                                                                                                                         | 9.8 | 6.9  | 2.9  | 10.7  |
| 4399 AT5G20500.1   glutaredoxin, putative, similar to glutaredoxin (Populus tremula x Populus tremuloides) gi:19548658:gb:AAL90750   chr5:6938600-6940269 FORWARD   Aliases: F7C8.90, F7C8_90                                                                                                                                                                                                                                                                                                                                                                                                                                                                              | 9.8 | 8.0  | 1.9  | 5.0   |
| 17176 AT2G37340.3   Symbol: RSZ33   splicing factor RSZ33 (RSZ33), nearly identical to splicing factor RSZ33 (Arabidopsis thaliana) GI:9843663; contains Pfam profiles PF00076: RNA recognition motif. (a.k.a. RRM, RBD, or RNP domain), PF00098: Zinc knuckle   chr2:15677226-15679750 REVERSE   Aliases: F3G5.13, F3G5_13                                                                                                                                                                                                                                                                                                                                                | 9.8 | 9.7  | 0.1  | 0.7   |
| 3269 AT2G26990.1   Symbol: FUS12   COP9 signalosome complex subunit 2 / CSN complex subunit 2 (CSN2), proteasome, COP9-complex and eIF3-domain protein; identical to CSN complex subunit 2 (Arabidopsis thaliana) GI:18056655; identical to cDNA CSN complex subunit 2 (CSN2) GI:18056654   chr2:11526585-11529665 REVERSE   Aliases: ATCSN2, CONSTITUTIVE PHOTOMORPHOGENIC 12, COP12, CSN2, FUSCA 12, T20P8.4, T20P8_4                                                                                                                                                                                                                                                    | 9.8 | 7.8  | 2.0  | 5.8   |
| 2127 AT1G47960.1   Symbol: C/MIF1                                                                                                                                                                                                                                                                                                                                                                                                                                                                                                                                                                                                                                          | 9.8 | 7.4  | 2.4  | 7.2   |
| 4135 AT5G16150.3   hexose transporter, putative, strong similarity to hexose transporter (Arabidopsis thaliana) GI:8347250; contains Pfam profile PF00083: major facilitator superfamily protein   chr5:5272690-5275818 FORWARD   Aliases: T21H19.70, T21H19_70                                                                                                                                                                                                                                                                                                                                                                                                            | 9.8 | 8.6  | 1.2  | 5.1   |
| 739 AT1G16000.1   expressed protein   chr1:5494530-5495317 FORWARD   Aliases: T24D18.10, T24D18_10                                                                                                                                                                                                                                                                                                                                                                                                                                                                                                                                                                         | 9.8 | 6.4  | 3.5  | 10.6  |
| 3163 AT2G18040.1   Symbol: PIN1AT                                                                                                                                                                                                                                                                                                                                                                                                                                                                                                                                                                                                                                          | 9.8 | 7.6  | 2.3  | 5.9   |
| 293 AT2G41290.1   strictosidine synthase family protein, similar to strictosidine synthase (Rauvolfia serpentina)(SP:P15324); contains strictosidine synthase domain PF03088   chr2:17217533-17220037 REVERSE   Aliases: F13H10.16, F13H10_16                                                                                                                                                                                                                                                                                                                                                                                                                              | 9.8 | 6.1  | 3.7  | 14.4  |
| 13749 ATCG00740.1   Symbol: RPOA   RNA polymerase alpha subunit   chrC:77901-78890 REVERSE   Aliases: RPOA                                                                                                                                                                                                                                                                                                                                                                                                                                                                                                                                                                 | 9.8 | 9.0  | 0.8  | 1.4   |
| 20039 AT1G63940.4   monodehydroascorbate reductase, putative, similar to monodehydroascorbate reductase GB:AAD28178 (Brassica juncea)   chr1:23733769-23737555 FORWARD   Aliases: T12P18.4, T12P18_4                                                                                                                                                                                                                                                                                                                                                                                                                                                                       | 9.8 | 9.9  | -0.1 | -0.2  |



|                                                                                                                                                                                                                                                                                                                                                                                                                                        |     |      |      |      |
|----------------------------------------------------------------------------------------------------------------------------------------------------------------------------------------------------------------------------------------------------------------------------------------------------------------------------------------------------------------------------------------------------------------------------------------|-----|------|------|------|
| 343 AT2G16890.2   UDP-glucuronosyl/UDP-glucosyl transferase family protein, contains Pfam profile: PF00201 UDP-glucuronosyl and UDP-glucosyl transferase   chr2:7323971-7326263 FORWARD   Aliases: F12A24.7, F12A24_7                                                                                                                                                                                                                  | 9.8 | 4.1  | 5.7  | 13.7 |
| 8432 AT1G32210.1   Symbol: ATDAD1                                                                                                                                                                                                                                                                                                                                                                                                      | 9.8 | 8.9  | 0.9  | 2.9  |
| 514 AT5G50800.1   nodulin MtN3 family protein, similar to MtN3 GI:1619602 (root nodule development) from (Medicago truncatula)   chr5:20682303-20684530 REVERSE   Aliases: K7B16.1, K7B16_1                                                                                                                                                                                                                                            | 9.8 | 4.6  | 5.2  | 11.9 |
| 11654 AT1G26670.1   Symbol: VTI12   vesical transport v-SNARE 12 (VTI12) / vesicle soluble NSF attachment protein receptor VTI1b (VTI1B) receptor VTI1b, identical to SP:Q9SEL5 Vesicle transport v-SNARE 12 (AtVTI12) (Vesicle transport v-SNARE protein VTI1b) (Vesicle soluble NSF attachment protein receptor VTI1b) (AtVTI1b) {Arabidopsis thaliana}   chr1:9215951-9217990 FORWARD   Aliases: ATVTI12, T24P13.5, T24P13_5, VTI1B | 9.8 | 10.1 | -0.3 | -1.9 |
| 1927 AT1G77380.1   Symbol: AAP3   amino acid carrier, putative / amino acid permease, putative, strong similarity to amino acid carrier GI:3293031 from (Ricinus communis); contains Pfam profile PF01490: Transmembrane amino acid transporter protein; identical to cDNA AAP3 (Amino Acid Permease) GI:3970651   chr1:29079782-29082284 REVERSE   Aliases: F2P24.9, F2P24_9                                                          | 9.8 | 7.1  | 2.7  | 7.5  |
| 120 AT2G07340.2   prefoldin-related KE2 family protein, contains similarity to Swiss-Prot:O60925 prefoldin subunit 1 (Homo sapiens); contains Pfam domain, PF01920: KE2 family protein   chr2:3045556-3046716 FORWARD   Aliases: T13E11.11, T13E11_11                                                                                                                                                                                  | 9.8 | 5.9  | 3.9  | 19.7 |
| 18934 AT1G66240.1   copper homeostasis factor, putative / copper chaperone, putative (CCH), similar to gi:3168840 contains Pfam profile PF00403: Heavy-metal-associated domain   chr1:24689940-24690995 REVERSE   Aliases: T6J19.6, T6J19_6                                                                                                                                                                                            | 9.8 | 9.7  | 0.1  | 0.4  |
| 18680 AT3G06350.1   Symbol: EMB3004   dehydroquinase dehydratase, putative / shikimate dehydrogenase, putative, similar to dehydroquinase dehydratase/shikimate dehydrogenase (Nicotiana tabacum)(GI:535771), dehydroquinase dehydratase/shikimate:NADP oxidoreductase (Lycopersicon esculentum)(GI:3169883)   chr3:1924368-1927759 REVERSE   Aliases: EMB3004, EMBRYO DEFECTIVE 3004, F24P17.18, F24P17_18                            | 9.8 | 9.7  | 0.1  | 0.5  |
| 5477 AT3G45770.2   oxidoreductase, zinc-binding dehydrogenase family protein, similar to nuclear receptor binding factor-1 NRBF-1 - Rattus norvegicus, EMBL:AB015724; contains Pfam zinc-binding dehydrogenase domain PF00107   chr3:16816547-16818780 REVERSE   Aliases: F16L2.2                                                                                                                                                      | 9.8 | 7.9  | 1.9  | 4.3  |
| 351 AT1G11430.1   plastid developmental protein DAG, putative, similar to DAG protein, chloroplast precursor (Garden snapdragon) SWISS-PROT:Q38732                                                                                                                                                                                                                                                                                     | 9.8 | 6.5  | 3.3  | 13.5 |
| 2560 AT5G55160.1   Symbol: SUM2   small ubiquitin-like modifier 2 (SUMO), similar to ubiquitin-like protein SMT3 SP:P55852 from (Arabidopsis thaliana); identical to cDNA small ubiquitin-like modifier 2 (SUMO) GI:22652843; contains Pfam profile PF00240: Ubiquitin family   chr5:22400795-22402151 REVERSE   Aliases: MCO15.11, MCO15_11, SMALL UBIQUITIN LIKE MODIFIER 2, SUMO 2, SUMO2                                           | 9.8 | 8.3  | 1.4  | 6.6  |
| 3599 AT4G12340.1   expressed protein   chr4:7321276-7322448 REVERSE   Aliases: T4C9.180, T4C9_180                                                                                                                                                                                                                                                                                                                                      | 9.8 | 8.1  | 1.7  | 5.6  |
| 2458 AT1G04430.1   dehydration-responsive protein-related, similar to early-responsive to dehydration stress ERD3 protein (Arabidopsis thaliana) GI:15320410; contains Pfam profile PF03141: Putative methyltransferase   chr1:1198136-1201526 FORWARD   Aliases: F19P19.11, F19P19_11                                                                                                                                                 | 9.8 | 7.6  | 2.2  | 6.7  |
| 4199 AT5G64310.1   Symbol: AGP1   arabinogalactan-protein (AGP1), identical to gi:3883120 gb:AAC77823   chr5:25739159-25739872 FORWARD   Aliases: ARABINO GALACTAN PROTEIN 1, MSJ1.15, MSJ1_15                                                                                                                                                                                                                                         | 9.8 | 7.9  | 1.9  | 5.1  |
| 8909 AT1G43310.1   triose phosphate/phosphate translocator-related, similar to SP:P52178 Triose phosphate/phosphate translocator, non-green plastid, chloroplast precursor (CTPT) {Brassica oleracea}   chr1:16348414-16348915 REVERSE   Aliases: F1I21.17, F1I21_17                                                                                                                                                                   | 9.8 | 7.4  | 2.4  | 2.7  |
| 8910 AT5G33320.1   Symbol: CUE1   triose phosphate/phosphate translocator, putative, similar to SWISS-PROT:P52178 triose phosphate/phosphate translocator (Cauliflower) {Brassica oleracea}   chr5:12606068-12608978 FORWARD   Aliases: ARAPPT, CAB UNDEREXPRESSED 1, F19N2.40, F19N2_40, PHOSPHATE/PHOSPHOENOLPYRUVATE TRANSLOCATOR, PHOSPHOENOLPYRUVATE/PHOSPHATE TRANSLOCATOR, PPT                                                  | 9.8 | 7.4  | 2.4  | 2.7  |
| 4771 AT5G25940.1   early nodulin-related, contains weak similarity to Swiss-Prot:Q02921 early nodulin 93 (N-93) (Glycine max)   chr5:9053704-9055217 REVERSE   Aliases: T1N24.3, T1N24_3                                                                                                                                                                                                                                               | 9.8 | 8.2  | 1.6  | 4.7  |
| 168 AT3G23325.1   splicing factor, putative, similar to Splicing factor 3B subunit 10 (SF3b10) (Pre-mRNA splicing factor SF3b 10 kDa subunit) (Swiss-Prot:Q9BWJ5) (Homo sapiens)   chr3:8345778-8347056 FORWARD   Aliases: None                                                                                                                                                                                                        | 9.8 | 4.4  | 5.3  | 17.2 |
| 809 AT2G35795.1   DNAJ heat shock N-terminal domain-containing protein, contains Pfam profile PF00226 DnaJ domain   chr2:15049289-15050646 FORWARD   Aliases: T20F21.1, T20F21_1                                                                                                                                                                                                                                                       | 9.8 | 7.4  | 2.3  | 10.2 |
| 2122 AT5G47810.1   phosphofructokinase family protein, similar to phosphofructokinase (Amycolatopsis methanolica) GI:17432243; contains Pfam profile PF00365: Phosphofructokinase   chr5:19373582-19375351 REVERSE   Aliases: MCA23.13, MCA23_13                                                                                                                                                                                       | 9.8 | 8.0  | 1.8  | 7.2  |

|                                                                                                                                                                                                                                                                                                                                                                                                                                                                                                                          |     |      |      |      |
|--------------------------------------------------------------------------------------------------------------------------------------------------------------------------------------------------------------------------------------------------------------------------------------------------------------------------------------------------------------------------------------------------------------------------------------------------------------------------------------------------------------------------|-----|------|------|------|
| 5978 AT1G66260.1   RNA and export factor-binding protein, putative, similar to GI:7159943 from (Mus musculus) (RNA 6 (4), 638-650 (2000))   chr1:24699303-24702093 REVERSE   Aliases: T6J19.1, T6J19_1                                                                                                                                                                                                                                                                                                                   | 9.8 | 10.6 | -0.8 | -4.0 |
| 18919 AT3G60450.1   expressed protein   chr3:22351940-22353285 FORWARD   Aliases: T8B10.110                                                                                                                                                                                                                                                                                                                                                                                                                              | 9.8 | 9.6  | 0.2  | 0.4  |
| 2348 AT1G25260.1   acidic ribosomal protein P0-related, contains similarity to 60S acidic ribosomal protein GI:5815233 from (Homo sapiens)   chr1:8853946-8855847 REVERSE   Aliases: F4F7.35, F4F7_35                                                                                                                                                                                                                                                                                                                    | 9.8 | 7.0  | 2.8  | 6.9  |
| 7771 AT5G63840.1   Symbol: RSW3   alpha-glucosidase, putative, similar to alpha-glucosidase GI:2648032 from (Solanum tuberosum)   chr5:25562282-25566425 FORWARD   Aliases: MGI19.5, MGI19_5, RADIAL SWELLING 3                                                                                                                                                                                                                                                                                                          | 9.8 | 8.7  | 1.0  | 3.2  |
| 7614 AT5G60160.1   aspartyl aminopeptidase, putative, similar to SP:Q9ULA0 Aspartyl aminopeptidase (EC 3.4.11.21) {Homo sapiens}; contains Pfam profile PF02127: Aminopeptidase I zinc metalloprotease (M18)   chr5:24240942-24244094 REVERSE   Aliases: F15L12.1, F15L12_1                                                                                                                                                                                                                                              | 9.8 | 8.5  | 1.2  | 3.3  |
| 3223 AT3G12920.1   expressed protein   chr3:4121890-4123503 REVERSE   Aliases: MGH6.3                                                                                                                                                                                                                                                                                                                                                                                                                                    | 9.8 | 10.5 | -0.8 | -5.9 |
| 4095 AT3G02630.1   acyl-(acyl-carrier-protein) desaturase, putative / stearoyl-ACP desaturase, putative, similar to Acyl-(acyl-carrier protein) desaturase from Sesamum indicum GI:575942, Cucumis sativus SP:P32061, Ricinus communis SP:P22337; contains Pfam profile PF03405 Fatty acid desaturase   chr3:562038-564877 FORWARD   Aliases: F16B3.26, F16B3_26                                                                                                                                                         | 9.8 | 6.2  | 3.5  | 5.2  |
| 194 AT5G07800.1   flavin-containing monooxygenase family protein / FMO family protein, similar to flavin-containing monooxygenase 2 (FMO2) from Homo sapiens (GI:1834493); contains Pfam profile: PF00743 Flavin-binding monooxygenase-like   chr5:2486607-2489297 REVERSE   Aliases: MXM12.4, MXM12_4                                                                                                                                                                                                                   | 9.8 | 4.5  | 5.3  | 16.7 |
| 3291 AT5G63400.2   Symbol: ADK1   similar to adenylate kinase, putative [Arabidopsis thaliana] (TAIR:At5g50370.1); similar to adenylate kinase-a [Oryza sativa] (GB:BAA01180.1); similar to adenylate kinase [Oryza sativa] (GB:BAA94761.1); contains InterPro domain Adenylate kinase, active site lid (InterPro:IPR007862); contains InterPro domain Adenylate kinase (InterPro:IPR000850)   chr5:25410227-25412090 REVERSE   Aliases: ADENYLATE KINASE 1, MLE2.3, MLE2_3                                              | 9.8 | 7.7  | 2.1  | 5.8  |
| 4437 AT1G72680.1   cinnamyl-alcohol dehydrogenase, putative, similar to cinnamyl-alcohol dehydrogenase GB:AAC35846 (Medicago sativa), SP:Q08350 (Picea abies)   chr1:27362894-27364678 REVERSE   Aliases: F28P22.13, F28P22_13                                                                                                                                                                                                                                                                                           | 9.7 | 6.4  | 3.3  | 4.9  |
| 883 AT2G04630.1   DNA-directed RNA polymerase II, putative, similar to SP:Q24320 DNA-directed RNA polymerase II 14.4 kDa polypeptide (EC 2.7.7.6) (RPB6) {Drosophila melanogaster}; contains Pfam profile PF01192: RNA polymerases K / 14 to 18 kDa subunit   chr2:1618933-1620308 REVERSE   Aliases: F28I8.33, F28I8_33                                                                                                                                                                                                 | 9.7 | 8.1  | 1.7  | 9.9  |
| 16054 AT2G38710.2   similar to DUF51 family protein [Dictyostelium discoideum] (GB:EAL65703.1); contains InterPro domain Protein of unknown function DUF51 (InterPro:IPR002733)   chr2:16191447-16194213 REVERSE   Aliases: T6A23.9, T6A23_9                                                                                                                                                                                                                                                                             | 9.7 | 10.0 | -0.3 | -1.0 |
| 331 AT1G15820.1   Symbol: LHCB6   chlorophyll A-B binding protein, chloroplast (LHCB6), nearly identical to Lhcb6 protein (Arabidopsis thaliana) GI:4741960; contains Pfam profile PF00504: Chlorophyll A-B binding protein   chr1:5446123-5447776 REVERSE   Aliases: CP24, F7H2.16, F7H2_16, LHCB6                                                                                                                                                                                                                      | 9.7 | 4.0  | 5.7  | 13.8 |
| 761 AT4G09550.1   expressed protein   chr4:6039132-6040171 FORWARD   Aliases: T15G18.30, T15G18_30                                                                                                                                                                                                                                                                                                                                                                                                                       | 9.7 | 6.2  | 3.6  | 10.5 |
| 17035 AT2G17870.1   cold-shock DNA-binding family protein, contains Pfam domains, PF00313: 'Cold-shock' DNA-binding domain and PF00098: Zinc knuckle                                                                                                                                                                                                                                                                                                                                                                     | 9.7 | 9.9  | -0.2 | -0.8 |
| 9590 AT1G64520.1   26S proteasome regulatory subunit, putative (RPN12), similar to 26S proteasome regulatory complex subunit p30 GB:AAF08395 GI:6434966 from (Drosophila melanogaster)   chr1:23960061-23961981 FORWARD   Aliases: F1N19.9, F1N19_9                                                                                                                                                                                                                                                                      | 9.7 | 8.3  | 1.5  | 2.5  |
| 3202 AT5G57120.1   expressed protein, weak similarity to SP:Q14978 Nucleolar phosphoprotein p130 {Homo sapiens}   chr5:23139766-23141739 REVERSE   Aliases: MUL3.6, MUL3_6                                                                                                                                                                                                                                                                                                                                               | 9.7 | 8.2  | 1.5  | 5.9  |
| 19131 AT1G15340.1   Symbol: MBD10   methyl-CpG-binding domain-containing protein, contains Pfam profile PF01429: Methyl-CpG binding domain   chr1:5275672-5277657 REVERSE   Aliases: F9L1.28, F9L1_28                                                                                                                                                                                                                                                                                                                    | 9.7 | 9.6  | 0.1  | 0.4  |
| 8811 AT2G43750.1   Symbol: OASB   cysteine synthase, chloroplast / O-acetylserine (thiol)-lyase / O-acetylserine sulfhydrylase / cpACS1 (OASB), identical to SP:P47999 Cysteine synthase, chloroplast precursor (EC 4.2.99.8) (O-acetylserine sulfhydrylase) (O-acetylserine (Thiol)-lyase) (cpACS1) {Arabidopsis thaliana}; identical to cDNA O-acetylserine lyase (At.OAS.7-4) GI:6983575   chr2:18136488-18139629 REVERSE   Aliases: ACS1, ATCS B, CPACS1, CSASE B, CYSTEINE SYNTHASE, CYSTEINE SYNTHASE 1, F18O19.14 | 9.7 | 8.9  | 0.8  | 2.8  |
| 13534 AT4G22670.1   tetratricopeptide repeat (TPR)-containing protein, similar to Hsc70-interacting protein (Hip) from {Homo sapiens} SP:P50502, {Rattus norvegicus} SP:P50503; contains Pfam profile PF00515: tetratricopeptide repeat (TPR) domain                                                                                                                                                                                                                                                                     | 9.7 | 9.4  | 0.3  | 1.5  |
| 1753 AT3G09735.1   DNA-binding S1FA family protein, contains Pfam profile: PF04689 DNA binding protein S1FA                                                                                                                                                                                                                                                                                                                                                                                                              | 9.7 | 8.2  | 1.5  | 7.8  |

|                                                                                                                                                                                                                                                                                                                                                                                                                                                                                                         |     |      |      |      |
|---------------------------------------------------------------------------------------------------------------------------------------------------------------------------------------------------------------------------------------------------------------------------------------------------------------------------------------------------------------------------------------------------------------------------------------------------------------------------------------------------------|-----|------|------|------|
| 3762 AT4G34350.1   Symbol: CLB6   Arabidopsis ISPH is involved in the plastid nonmevalonate pathway of isoprenoid biosynthesis. It was shown to complement the lethal phenotype of E.coli ispH mutant and is therefore most likely encodes a protein with 4-hydroxy-3-methylbut-2-en-1-yl diphosphate reductase activity involved in the last step of mevalonate-independent isopentenyl biosynthesis.   chr4:16428484-16431117 REVERSE   Aliases: CHLOROPLAST BIOGENESIS, F10M10.120, F10M10_120, ISPH | 9.7 | 8.1  | 1.6  | 5.4  |
| 10383 AT5G63030.1   glutaredoxin, putative, similar to glutaredoxin (Ricinus communis) gi:1732424:emb:CAA89699   chr5:25303511-25304906 FORWARD   Aliases: MJH22.9, MJH22_9                                                                                                                                                                                                                                                                                                                             | 9.7 | 9.3  | 0.4  | 2.2  |
| 3117 AT3G50685.1   expressed protein   chr3:18845200-18845815 REVERSE   Aliases: None                                                                                                                                                                                                                                                                                                                                                                                                                   | 9.7 | 8.5  | 1.2  | 6.0  |
| 2349 AT1G18640.2   Symbol: PSP   3-phosphoserine phosphatase (PSP), nearly identical to 3-phosphoserine phosphatase GI:3759177 from (Arabidopsis thaliana)                                                                                                                                                                                                                                                                                                                                              | 9.7 | 7.7  | 2.0  | 6.9  |
| 3058 AT5G01340.1   mitochondrial substrate carrier family protein, contains Pfam profile: PF00153 mitochondrial carrier protein   chr5:143054-144719 REVERSE   Aliases: T1008.50, T1008_50                                                                                                                                                                                                                                                                                                              | 9.7 | 6.9  | 2.8  | 6.1  |
| 8443 AT3G46030.1   histone H2B, putative, strong similarity to histone H2B Arabidopsis thaliana GI:2407802, Gossypium hirsutum SP:O22582, Lycopersicon esculentum GI:3021489; contains Pfam profile PF00125 Core histone H2A/H2B/H3/H4   chr3:16924433-16925116 REVERSE   Aliases: F16L2.240                                                                                                                                                                                                            | 9.7 | 8.9  | 0.8  | 2.9  |
| 85 AT5G16990.1   NADP-dependent oxidoreductase, putative, strong similarity to probable NADP-dependent oxidoreductase (zeta-crystallin homolog) P1 (SP:Q39172)(gi:886428) and P2 (SP:Q39173)(gi:886430), Arabidopsis thaliana   chr5:5581661-5584032 REVERSE   Aliases: F2K13.140, F2K13_140                                                                                                                                                                                                            | 9.7 | 3.7  | 6.1  | 21.5 |
| 5766 AT5G20890.1   chaperonin, putative, similar to SWISS-PROT:P78371- T-complex protein 1, beta subunit (TCP-1-beta) (Homo sapiens); contains Pfam:PF00118 domain, TCP-1/cpn60 chaperonin family   chr5:7086655-7090083 REVERSE   Aliases: F22D1.60, F22D1_60                                                                                                                                                                                                                                          | 9.7 | 8.6  | 1.1  | 4.2  |
| 15378 AT5G56030.1   Symbol: HSP81 2   heat shock protein 81-2 (HSP81-2), nearly identical to SP:P55737 Heat shock protein 81-2 (HSP81-2) {Arabidopsis thaliana}   chr5:22704058-22706876 FORWARD   Aliases: HEAT SHOCK PROTEIN 81 2, MDA7.7, MDA7_7                                                                                                                                                                                                                                                     | 9.7 | 9.5  | 0.2  | 1.1  |
| 7342 AT3G26770.1   short-chain dehydrogenase/reductase (SDR) family protein, similar to sex determination protein tasselseed 2 SP:P50160 from (Zea mays)   chr3:9846721-9848385 FORWARD   Aliases: MDJ14.1                                                                                                                                                                                                                                                                                              | 9.7 | 8.8  | 0.9  | 3.4  |
| 9282 AT4G35830.1   aconitate hydratase, cytoplasmic / citrate hydro-lyase / aconitase (ACO), identical to SP:Q42560 Aconitate hydratase, cytoplasmic (EC 4.2.1.3) (Citrate hydro-lyase) (Aconitase) {Arabidopsis thaliana}; contains Pfam profiles PF00330: Aconitase family (aconitate hydratase), PF00694: Aconitase C-terminal domain   chr4:16972602-16978061 REVERSE   Aliases: F4B14.100, F4B14_100                                                                                               | 9.7 | 10.2 | -0.5 | -2.6 |
| 241 AT1G28110.2   Symbol: SCPL45                                                                                                                                                                                                                                                                                                                                                                                                                                                                        | 9.7 | 5.2  | 4.5  | 15.5 |
| 16059 AT3G06580.1   Symbol: GAL1   galactokinase (GAL1), identical to galactokinase (Galactose kinase) (Arabidopsis thaliana) SWISS-PROT:Q9SEE5   chr3:2048911-2052031 REVERSE   Aliases: F5E6.9, F5E6_9, GALACTOSE KINASE 1                                                                                                                                                                                                                                                                            | 9.7 | 9.2  | 0.5  | 1.0  |
| 15217 AT1G01630.1   SEC14 cytosolic factor, putative / phosphoglyceride transfer protein, putative, contains Pfam PF00650 : CRAL/TRIO domain and PF03765 : CRAL/TRIO, N-terminus; similar to polyphosphoinositide binding protein Ssh2p GB:AAB94599 GI:2739046 from (Glycine max)   chr1:229057-230917 FORWARD   Aliases: T1N6.1, T1N6_1                                                                                                                                                                | 9.7 | 9.3  | 0.4  | 1.1  |
| 1996 AT5G11340.1   GCN5-related N-acetyltransferase (GNAT) family protein, low similarity to SP:Q03503 L-A virus GAG protein N-acetyltransferase (EC 2.3.1.-) {Saccharomyces cerevisiae}; contains Pfam profile PF00583: acetyltransferase, GNAT family   chr5:3619156-3621232 FORWARD   Aliases: F2111.230, F2111_230                                                                                                                                                                                  | 9.7 | 7.6  | 2.1  | 7.4  |
| 18648 AT5G43830.1   expressed protein, similar to auxin down-regulated protein ARG10 (Vigna radiata) GI:2970051, wali7 (aluminum-induced protein) (Triticum aestivum) GI:451193   chr5:17639563-17641545 REVERSE   Aliases: MQD19.19, MQD19_19                                                                                                                                                                                                                                                          | 9.7 | 9.5  | 0.2  | 0.5  |
| 12847 AT5G20070.1   MutT/nudix family protein, low similarity to SP:Q19427 NADH pyrophosphatase (EC 3.6.1.-) {Caenorhabditis elegans}; contains Pfam profile PF00293: NUDIX domain   chr5:6779862-6782484 FORWARD   Aliases: F28I16.220, F28I16_220                                                                                                                                                                                                                                                     | 9.7 | 9.3  | 0.4  | 1.6  |
| 1353 AT2G37990.1   ribosome biogenesis regulatory protein (RRS1) family protein, contains Pfam profile PF04939: Ribosome biogenesis regulatory protein (RRS1); similar to Ribosome biogenesis regulatory protein homolog (Swiss-Prot:Q15050) (Homo sapiens)                                                                                                                                                                                                                                             | 9.7 | 6.6  | 3.1  | 8.6  |
| 20006 AT5G46210.1   Symbol: CUL4   cullin, putative, similar to SP:Q13619 Cullin homolog 4A (CUL-4A) {Homo sapiens}; contains Pfam profile PF00888: Cullin family   chr5:18748645-18754037 REVERSE   Aliases: CUL4, MDE13.3, MDE13_3                                                                                                                                                                                                                                                                    | 9.7 | 9.6  | 0.0  | 0.2  |
| 10933 AT5G14440.2   similar to surfeit locus protein 2 family protein / SURF2 family protein [Arabidopsis thaliana] (TAIR:At5g40570.1); similar to hypothetical protein DDB0206414 [Dictyostelium discoideum] (GB:EAL67308.1); contains InterPro domain Surfeit locus 2 (InterPro:IPR008833)                                                                                                                                                                                                            | 9.7 | 9.0  | 0.7  | 2.1  |
| 2241 AT2G27960.1   Symbol: CKS1   cyclin-dependent kinase / CDK (CKS1), identical to Cks1 protein (Arabidopsis thaliana) gi:2274859:emb:CAA03859   chr2:11917803-11918703 REVERSE   Aliases: CATALYTIC SUBUNIT OF CYCLIN DEPENDENT KINASE, CDK subunit 1, CKS1, CKS1AT, P10CKS1AT, SUC1, T1E2.12, T1E2_12                                                                                                                                                                                               | 9.7 | 7.2  | 2.5  | 7.0  |



|                                                                                                                                                                                                                                                                                                                                                                                                                                                                                                                                                                                                                                                                                                                                                                                   |     |      |      |       |
|-----------------------------------------------------------------------------------------------------------------------------------------------------------------------------------------------------------------------------------------------------------------------------------------------------------------------------------------------------------------------------------------------------------------------------------------------------------------------------------------------------------------------------------------------------------------------------------------------------------------------------------------------------------------------------------------------------------------------------------------------------------------------------------|-----|------|------|-------|
| 14491 AT5G35680.2   eukaryotic translation initiation factor 1A, putative / eIF-1A, putative / eIF-4C, putative, strong similarity to translation initiation factor (eIF-1A) (Beta vulgaris) GI:17977975; contains Pfam profile PF01176: Eukaryotic initiation factor 1A   chr5:13875151-13876207 REVERSE   Aliases: MXH1.2, MXH1_2                                                                                                                                                                                                                                                                                                                                                                                                                                               | 9.7 | 9.2  | 0.5  | 1.3   |
| 16173 AT3G27770.1   expressed protein   chr3:10286072-10288979 REVERSE   Aliases: MGF10.17                                                                                                                                                                                                                                                                                                                                                                                                                                                                                                                                                                                                                                                                                        | 9.7 | 10.1 | -0.4 | -0.9  |
| 260 AT5G25770.2   expressed protein   chr5:8969219-8972049 REVERSE   Aliases: F18A17.20, F18A17_20                                                                                                                                                                                                                                                                                                                                                                                                                                                                                                                                                                                                                                                                                | 9.7 | 11.7 | -2.1 | -15.1 |
| 18998 AT1G04120.1   Symbol: ATMRP5                                                                                                                                                                                                                                                                                                                                                                                                                                                                                                                                                                                                                                                                                                                                                | 9.7 | 9.6  | 0.1  | 0.4   |
| 7134 AT1G54270.1   Symbol: EIF4A 2   eukaryotic translation initiation factor 4A-2 / eIF-4A-2, similar to eukaryotic translation initiation factor 4A GI:19696 from (Nicotiana plumbaginifolia)   chr1:20263359-20265933 FORWARD   Aliases: F20D21.9, F20D21_9                                                                                                                                                                                                                                                                                                                                                                                                                                                                                                                    | 9.7 | 8.6  | 1.1  | 3.5   |
| 7678 AT2G02510.1   expressed protein   chr2:673304-674738 FORWARD   Aliases: T8K22.19, T8K22_19                                                                                                                                                                                                                                                                                                                                                                                                                                                                                                                                                                                                                                                                                   | 9.7 | 9.1  | 0.6  | 3.3   |
| 4084 AT5G22740.1   Symbol: ATCSLA02   glycosyl transferase family 2 protein, similar to beta-(1-3)-glucosyl transferase GB:AA62210 GI:3687658 from (Bradyrhizobium japonicum), cellulose synthase from Agrobacterium tumeficiens (gi:710492) and Agrobacterium radiobacter (gi:710493); contains Pfam glycosyl transferase, group 2 family protein domain PF00535                                                                                                                                                                                                                                                                                                                                                                                                                 | 9.7 | 7.1  | 2.6  | 5.2   |
| 6956 AT3G15020.1   malate dehydrogenase (NAD), mitochondrial, putative, similar to mitochondrial NAD-dependent malate dehydrogenase GB:CAA10320 SP:Q9ZP06 (Arabidopsis thaliana); contains InterPro entry IPR001236: Lactate/malate dehydrogenase   chr3:5056083-5058255 FORWARD   Aliases: K15M2.16                                                                                                                                                                                                                                                                                                                                                                                                                                                                              | 9.7 | 7.9  | 1.7  | 3.6   |
| 1269 AT3G49720.1   expressed protein   chr3:18450988-18453182 REVERSE   Aliases: T16K5.70                                                                                                                                                                                                                                                                                                                                                                                                                                                                                                                                                                                                                                                                                         | 9.7 | 7.0  | 2.7  | 8.8   |
| 16169 AT2G04900.1   expressed protein   chr2:1722478-1723828 FORWARD   Aliases: F1O13.3                                                                                                                                                                                                                                                                                                                                                                                                                                                                                                                                                                                                                                                                                           | 9.7 | 9.5  | 0.2  | 0.9   |
| 550 AT5G18040.1   expressed protein   chr5:5972421-5974158 FORWARD   Aliases: MCM23.14, MCM23_14                                                                                                                                                                                                                                                                                                                                                                                                                                                                                                                                                                                                                                                                                  | 9.7 | 7.4  | 2.3  | 11.6  |
| 6528 AT3G03250.1   Symbol: UGP   Is thought to encodes a cytosolic UDP-glucose pyrophosphorylase with strong similarity to UTP--glucose-1-phosphate uridylyltransferase (SwissProt P19595, EC 2.7.7.9, UDP-glucose pyrophosphorylase <i>Solanum tuberosum</i>).   chr3:749486-754166 REVERSE   Aliases: T17B22.6, T17B22_6, UGP, UGPASE                                                                                                                                                                                                                                                                                                                                                                                                                                           | 9.7 | 7.6  | 2.1  | 3.8   |
| 14029 AT5G17380.1   pyruvate decarboxylase family protein, similar to 2-hydroxyphytanoyl-CoA lyase (Homo sapiens) GI:6273457; contains InterPro entry IPR000399: Pyruvate decarboxylase   chr5:5724770-5726748 REVERSE   Aliases: T10B6.40, T10B6_40                                                                                                                                                                                                                                                                                                                                                                                                                                                                                                                              | 9.7 | 10.2 | -0.5 | -1.4  |
| 17707 AT1G49820.1   5-methylthioribose kinase family, contains TIGRfam TIGR01767: 5-methylthioribose kinase profile   chr1:18446600-18448766 FORWARD   Aliases: F10F5.1, F10F5_1                                                                                                                                                                                                                                                                                                                                                                                                                                                                                                                                                                                                  | 9.7 | 9.3  | 0.3  | 0.6   |
| 10189 AT1G24050.1   expressed protein, similar to hypothetical protein [Arabidopsis thaliana] (TAIR:At1g70220.1); similar to hypothetical protein DDB0191031 [Dictyostelium discoideum] (GB:EAL72551.1)   chr1:8507009-8508853 FORWARD   Aliases: T23E23.20, T23E23_20                                                                                                                                                                                                                                                                                                                                                                                                                                                                                                            | 9.7 | 8.8  | 0.8  | 2.3   |
| 3988 AT1G02140.1   mago nashi family protein, similar to Mago Nashi, Genbank Accession Number U03559; contains Pfam PF02792: Mago nashi protein domain   chr1:403195-404439 REVERSE   Aliases: T7I23.7, T7I23_7                                                                                                                                                                                                                                                                                                                                                                                                                                                                                                                                                                   | 9.7 | 6.9  | 2.7  | 5.3   |
| 253 AT5G06210.1   RNA-binding protein, putative, contains similarity to RNA-binding protein from (Nicotiana tabacum) GI:15822703, (Nicotiana glauca) GI:624925, (Solanum tuberosum) GI:15822705; contains InterPro entry IPR000504: RNA-binding region RNP-1 (RNA recognition motif) (RRM)   chr5:1878472-1879741 FORWARD   Aliases: MBL20.9, MBL20_9                                                                                                                                                                                                                                                                                                                                                                                                                             | 9.7 | 6.1  | 3.5  | 15.2  |
| 20557 AT1G79940.2   similar to DNAJ heat shock N-terminal domain-containing protein / sec63 domain-containing protein [Arabidopsis thaliana] (TAIR:At4g21180.1); similar to DNAJ-like Sec63 homologue [Plasmodium falciparum 3D7] (GB:NP_705096.1); contains InterPro domain Heat shock protein DnaJ (InterPro:IPR003095); contains InterPro domain Heat shock protein DnaJ, N-terminal (InterPro:IPR001623); contains InterPro domain Sec63 domain (InterPro:IPR004179)   chr1:30074497-30078232 FORWARD   Aliases: F19K16.10, F19K16_10                                                                                                                                                                                                                                         | 9.7 | 9.6  | 0.0  | 0.1   |
| 12792 AT4G33360.1   terpene cyclase/mutase-related, low similarity to squalene-hopene cyclase from Zymomonas mobilis (SP:P33990)   chr4:16067675-16069377 REVERSE   Aliases: F17M5.120, F17M5_120                                                                                                                                                                                                                                                                                                                                                                                                                                                                                                                                                                                 | 9.7 | 8.9  | 0.8  | 1.6   |
| 11307 AT5G67380.2   Symbol: CKA1   similar to casein kinase II alpha chain 2 [Arabidopsis thaliana] (TAIR:At3g50000.1); similar to casein kinase 2 catalytic subunit [Nicotiana tabacum] (GB:BAC02726.1); similar to casein kinase 2 catalytic subunit [Nicotiana tabacum] (GB:BAC02727.1); similar to protein kinase CK2 alpha chain [Nicotiana tabacum] (GB:CAD27342.1); similar to protein kinase CK2 alpha chain [Nicotiana tabacum] (GB:CAD27341.1); contains InterPro domain Serine/threonine protein kinase, active site (InterPro:IPR008271); contains InterPro domain Serine/threonine protein kinase (InterPro:IPR002290); contains InterPro domain Protein kinase (InterPro:IPR000719)   chr5:26898192-26900634 REVERSE   Aliases: ATCKA1, ATPK12D, K8K14.10, K8K14_10 | 9.7 | 9.1  | 0.6  | 2.0   |

|                                                                                                                                                                                                                                                                                                                                                                                                                                                                                                                                                                                                                                                                                                                                                    |     |      |      |      |
|----------------------------------------------------------------------------------------------------------------------------------------------------------------------------------------------------------------------------------------------------------------------------------------------------------------------------------------------------------------------------------------------------------------------------------------------------------------------------------------------------------------------------------------------------------------------------------------------------------------------------------------------------------------------------------------------------------------------------------------------------|-----|------|------|------|
| 575 AT1G57540.2   expressed protein, contains similarity to T-box domain GI:5931592 from ( <i>Cynops pyrrhogaster</i> )   chr1:21313995-21315077 REVERSE   Aliases: F25P12.4                                                                                                                                                                                                                                                                                                                                                                                                                                                                                                                                                                       | 9.7 | 6.3  | 3.3  | 11.4 |
| 441 AT2G18400.1   ribosomal protein L6 family protein   chr2:7996561-7997668 REVERSE   Aliases: T30D6.9, T30D6_9                                                                                                                                                                                                                                                                                                                                                                                                                                                                                                                                                                                                                                   | 9.7 | 6.5  | 3.1  | 12.5 |
| 873 AT5G63310.1   Symbol: NDPK2   nucleotide diphosphate kinase II, chloroplast (NDPK2), identical to SP:O64903 Nucleoside diphosphate kinase II, chloroplast precursor (NDK II) (NDP kinase II) (NDPK II) (NDPK Ia) ( <i>Arabidopsis thaliana</i> ); contains Pfam PF00334 : Nucleoside diphosphate kinase domain; contains Pfam profile PF00334: Nucleoside diphosphate kinase   chr5:25389130-25391081 REVERSE   Aliases: MDC12.28, MDC12_28, NDPK IA, NDPK IA IA, NDPK1A, NUCLEOSIDE DIPHOSPHATE KINASE 2, NUCLEOSIDE DIPHOSPHATE KINASE IA                                                                                                                                                                                                    | 9.7 | 6.1  | 3.5  | 10.0 |
| 8551 AT1G49300.2   similar to Ras-related GTP-binding protein, putative [ <i>Arabidopsis thaliana</i> ] (TAIR:At3g18820.1); similar to putative GTP-binding protein [ <i>Cucumis sativus</i> ] (GB:AAQ72787.1); contains InterPro domain Small GTP-binding protein domain (InterPro:IPR005225); contains InterPro domain Ras small GTPase, Rab type (InterPro:IPR003579); contains InterPro domain Ras small GTPase, Rho type (InterPro:IPR003578); contains InterPro domain Ras small GTPase, Ras type (InterPro:IPR003577); contains InterPro domain Ras GTPase superfamily (InterPro:IPR001806); contains InterPro domain GTP-binding nuclear protein Ran (InterPro:IPR002041)   chr1:18238417-18241195 FORWARD   Aliases: F13F21.26, F13F21_26 | 9.7 | 10.2 | -0.5 | -2.9 |
| 3435 NA                                                                                                                                                                                                                                                                                                                                                                                                                                                                                                                                                                                                                                                                                                                                            | 9.7 | 4.3  | 5.3  | 5.7  |
| 621 AT1G29250.1   expressed protein, contains TIGRFAM TIGR00285: conserved hypothetical protein TIGR00285   chr1:10223252-10224713 REVERSE   Aliases: F28N24.7, F28N24_7                                                                                                                                                                                                                                                                                                                                                                                                                                                                                                                                                                           | 9.7 | 6.6  | 3.1  | 11.1 |
| 3916 AT3G17940.1   aldose 1-epimerase family protein, similar to ALDOSE 1-EPIMERASE PRECURSOR GB:P05149 (SP:P05149) from ( <i>Acinetobacter calcoaceticus</i> ); contains Pfam profile PF01263 Aldose 1-epimerase   chr3:6143525-6145324 REVERSE   Aliases: MEB5.16                                                                                                                                                                                                                                                                                                                                                                                                                                                                                | 9.7 | 8.6  | 1.0  | 5.3  |
| 12592 AT2G25070.1   protein phosphatase 2C, putative / PP2C, putative   chr2:10670319-10673043 REVERSE   Aliases: F13D4.1                                                                                                                                                                                                                                                                                                                                                                                                                                                                                                                                                                                                                          | 9.7 | 10.0 | -0.3 | -1.7 |
| 3980 AT3G19820.2   Symbol: DWF1   cell elongation protein / DWARF1 / DIMINUTO (DIM), identical to GB:S71189 (SP:Q39085) from ( <i>Arabidopsis thaliana</i> ); contains Pfam FAD binding domain PF01565   chr3:6879624-6882265 REVERSE   Aliases: CABBAGE 1, CBB1, DIM, DIM1, DIMINUTIA, DIMINUTO 1, DW1, DWARF 1, EVE1, MPN9.6                                                                                                                                                                                                                                                                                                                                                                                                                     | 9.7 | 7.0  | 2.6  | 5.3  |
| 8019 AT4G34720.1   vacuolar ATP synthase 16 kDa proteolipid subunit 1 / V-ATPase 16 kDa proteolipid subunit 1 (AVAP1) (AVA-P1), identical to SP:P59227 Vacuolar ATP synthase 16 kDa proteolipid subunit 1/3/5 (EC 3.6.3.14) (V-ATPase 16 kDa proteolipid subunit 1/3/5) { <i>Arabidopsis thaliana</i> }; contains Pfam profile PF00137: ATP synthase subunit C   chr4:16567829-16569300 REVERSE   Aliases: T4L20.300                                                                                                                                                                                                                                                                                                                               | 9.6 | 10.6 | -1.0 | -3.1 |
| 16205 AT1G05180.3   Symbol: AXR1   similar to auxin-resistance protein, putative [ <i>Arabidopsis thaliana</i> ] (TAIR:At2g32410.1); similar to putative ubiquitin-activating enzyme (alternative splicing product) [ <i>Oryza sativa</i> (japonica cultivar-group)] (GB:XP_470133.1)   chr1:1498113-1501823 REVERSE   Aliases: AUXIN RESISTANT 1, AUXIN RESISTANT PROTEIN 1, YUP8H12.21, YUP8H12_21                                                                                                                                                                                                                                                                                                                                               | 9.6 | 9.8  | -0.2 | -0.9 |
| 3615 AT2G36950.1   heavy-metal-associated domain-containing protein, nearly identical to farnesylated protein ATFP2 (GI:4097545) Pfam profile PF00403: Heavy-metal-associated domain   chr2:15522212-15524010 FORWARD   Aliases: T1J8.13, T1J8_13                                                                                                                                                                                                                                                                                                                                                                                                                                                                                                  | 9.6 | 11.6 | -2.0 | -5.5 |
| 8426 AT2G20420.1   succinyl-CoA ligase (GDP-forming) beta-chain, mitochondrial, putative / succinyl-CoA synthetase, beta chain, putative / SCS-beta, putative, identical to SP:O82662 Succinyl-CoA ligase (GDP-forming) beta-chain, mitochondrial precursor (EC 6.2.1.4) (Succinyl-CoA synthetase, beta chain) (SCS- beta) { <i>Arabidopsis thaliana</i> }; similar to SP:O97580 Succinyl-CoA ligase (ADP-forming) beta-chain, mitochondrial precursor (EC 6.2.1.5) { <i>Sus scrofa</i> }; contains Pfam profiles PF00549: CoA-ligase, PF02222: ATP-grasp domain   chr2:8812537-8815187 FORWARD   Aliases: F11A3.3, F11A3_3                                                                                                                        | 9.6 | 7.8  | 1.8  | 2.9  |
| 1344 AT1G72170.1   expressed protein, contains Pfam PF04418: Domain of unknown function (DUF543)   chr1:27159997-27161338 FORWARD   Aliases: T9N14.2                                                                                                                                                                                                                                                                                                                                                                                                                                                                                                                                                                                               | 9.6 | 7.1  | 2.5  | 8.6  |
| 1488 AT3G04550.1   expressed protein   chr3:1225928-1227442 FORWARD   Aliases: F7O18.2, F7O18_2                                                                                                                                                                                                                                                                                                                                                                                                                                                                                                                                                                                                                                                    | 9.6 | 7.5  | 2.1  | 8.3  |
| 734 AT4G25810.1   Symbol: XTR6   xyloglucan:xyloglucosyl transferase, putative / xyloglucan endotransglycosylase, putative / endo-xyloglucan transferase, putative (XTR6), identical to xyloglucan endotransglycosylase-related protein GI:1244758 from ( <i>Arabidopsis thaliana</i> )   chr4:13128655-13129893 FORWARD   Aliases: F14M19.90, F14M19_90, XYLOGLUCAN ENDOTRANGLYCOSYLASE 6                                                                                                                                                                                                                                                                                                                                                         | 9.6 | 4.6  | 5.1  | 10.6 |
| 1208 AT4G29840.2   Symbol: MTO2   threonine synthase, chloroplast, identical to SP:Q9S7B5 Threonine synthase, chloroplast precursor (EC 4.2.3.1) (TS) { <i>Arabidopsis thaliana</i> }   chr4:14597716-14601061 REVERSE   Aliases: F27B13.80, F27B13_80, METHIONINE OVER ACCUMULATOR, THREONINE SYNTHASE, TS                                                                                                                                                                                                                                                                                                                                                                                                                                        | 9.6 | 6.5  | 3.1  | 9.0  |
| 7507 AT5G12040.2   carbon-nitrogen hydrolase family protein, similar to Nit protein 2 ( <i>Homo sapiens</i> ) GI:9367116; contains Pfam profile PF00795: hydrolase, carbon-nitrogen family   chr5:3885155-3888055 FORWARD   Aliases: F14F18.210, F14F18_210                                                                                                                                                                                                                                                                                                                                                                                                                                                                                        | 9.6 | 8.8  | 0.9  | 3.3  |
| 3027 AT3G47833.1   expressed protein   chr3:17659618-17661125 FORWARD   Aliases: None                                                                                                                                                                                                                                                                                                                                                                                                                                                                                                                                                                                                                                                              | 9.6 | 8.5  | 1.2  | 6.1  |

|                                                                                                                                                                                                                                                                                                                                                                                                                            |     |      |      |      |
|----------------------------------------------------------------------------------------------------------------------------------------------------------------------------------------------------------------------------------------------------------------------------------------------------------------------------------------------------------------------------------------------------------------------------|-----|------|------|------|
| 4935 AT5G38660.1   Symbol: APE1   expressed protein, similar to unknown protein (pir::S75762)   chr5:15490363-15492765 REVERSE   Aliases: ACCLIMATION OF PHOTOSYNTHESIS TO ENVIRONMENT, MBB18.21, MBB18_21                                                                                                                                                                                                                 | 9.6 | 7.4  | 2.2  | 4.6  |
| 20220 AT3G13410.1   expressed protein   chr3:4361889-4364242 REVERSE   Aliases: MRP15.4                                                                                                                                                                                                                                                                                                                                    | 9.6 | 9.6  | 0.1  | 0.2  |
| 3857 AT1G17470.1   Symbol: ATDRG1                                                                                                                                                                                                                                                                                                                                                                                          | 9.6 | 8.0  | 1.6  | 5.4  |
| 13736 AT5G47120.1   Symbol: ATBI 1                                                                                                                                                                                                                                                                                                                                                                                         | 9.6 | 10.4 | -0.7 | -1.4 |
| 78 AT1G68470.1   exostosin family protein, contains Pfam profile: PF03016                                                                                                                                                                                                                                                                                                                                                  | 9.6 | 3.5  | 6.2  | 22.2 |
| 1890 AT5G08100.2   L-asparaginase / L-asparagine amidohydrolase, identical to Swiss-Prot:P50287 L-asparaginase (EC 3.5.1.1) (L-asparagine amidohydrolase) (Arabidopsis thaliana)   chr5:2593051-2594628 REVERSE   Aliases: T22D6.40, T22D6_40                                                                                                                                                                              | 9.6 | 7.8  | 1.8  | 7.6  |
| 17705 AT3G44110.2   Symbol: ATJ3   DNAJ heat shock protein, putative (J3), identical to AtJ3 (Arabidopsis thaliana) GI:2641638, strong similarity to several plant DnaJ proteins from PGR; contains Pfam profiles PF00226 DnaJ domain, PF00684 DnaJ central domain (4 repeats), PF01556 DnaJ C terminal region   chr3:15879781-15882208 REVERSE   Aliases: ATJ, F26G5.60                                                   | 9.6 | 9.2  | 0.4  | 0.6  |
| 10737 AT3G21865.1   expressed protein   chr3:7701139-7703328 REVERSE   Aliases: MSD21.24, MSD21_24                                                                                                                                                                                                                                                                                                                         | 9.6 | 9.2  | 0.4  | 2.1  |
| 1902 AT3G50910.1   expressed protein   chr3:18930494-18933219 FORWARD   Aliases: F18B3.190                                                                                                                                                                                                                                                                                                                                 | 9.6 | 7.9  | 1.7  | 7.6  |
| 5789 AT3G19240.1   expressed protein   chr3:6664256-6666564 FORWARD   Aliases: MVI11.21                                                                                                                                                                                                                                                                                                                                    | 9.6 | 8.3  | 1.3  | 4.1  |
| 3464 AT5G46030.1   expressed protein, contains Pfam profile PF05129: Putative zinc binding domain (DUF701)   chr5:18687356-18688566 FORWARD   Aliases: MCL19.8, MCL19_8                                                                                                                                                                                                                                                    | 9.6 | 8.4  | 1.2  | 5.7  |
| 1789 AT5G13630.1   Symbol: GUN5   magnesium-chelatase subunit chlH, chloroplast, putative / Mg-protoporphyrin IX chelatase, putative (CHLH), nearly identical to magnesium chelatase subunit GI:1154627 from (Arabidopsis thaliana); contains Pfam profile: PF02514 CobN/magnesium chelatase family protein   chr5:4387337-4392230 REVERSE   Aliases: CCH, CCH1, CHLH, CONDITIONAL CHLORINA, GENOMES UNCOUPLED 5, T6I14.12 | 9.6 | 6.2  | 3.4  | 7.7  |
| 3987 AT2G31090.1   expressed protein   chr2:13263215-13263788 FORWARD   Aliases: T16B12.10, T16B12_10                                                                                                                                                                                                                                                                                                                      | 9.6 | 10.8 | -1.2 | -5.3 |
| 13987 AT1G79690.1   MutT/nudix family protein, contains Pfam NUDIX domain (PF00293); very low similarity to Chain A and Chain B of Escherichia coli isopentenyl diphosphate:dimethylallyl diphosphate isomerase (gi:15826361) (gi:15826360)   chr1:29990223-29996035 FORWARD   Aliases: F20B17.11, F20B17_11                                                                                                               | 9.6 | 9.9  | -0.3 | -1.4 |
| 19350 AT1G74090.1   sulfotransferase family protein, similar to SP:P52837 Flavonol 4'-sulfotransferase (EC 2.8.2.-) (F4-ST) {Flaveria chloraefolia}; contains Pfam profile PF00685: Sulfotransferase domain   chr1:27866570-27867854 FORWARD   Aliases: F2P9.4, F2P9_4                                                                                                                                                     | 9.6 | 9.5  | 0.1  | 0.3  |
| 885 AT3G04920.1   40S ribosomal protein S24 (RPS24A), similar to ribosomal protein S19 GB:445612 (Solanum tuberosum) and similar to ribosomal protein S24 GB:4506703 (Homo sapiens)   chr3:1360888-1362301 FORWARD   Aliases: T9J14.13, T9J14_13                                                                                                                                                                           | 9.6 | 6.4  | 3.2  | 9.9  |
| 760 AT5G16570.1   Symbol: GLN1;4                                                                                                                                                                                                                                                                                                                                                                                           | 9.6 | 7.3  | 2.3  | 10.5 |
| 13580 AT5G53800.1   expressed protein   chr5:21865361-21867337 FORWARD   Aliases: MGN6.19, MGN6_19                                                                                                                                                                                                                                                                                                                         | 9.6 | 8.8  | 0.8  | 1.5  |
| 8626 AT5G63510.1   bacterial transferase hexapeptide repeat-containing protein, contains similarity to acetyltransferase; contains Pfam profile PF00132: Bacterial transferase hexapeptide (four repeats)   chr5:25441226-25443067 FORWARD   Aliases: MLE2.14, MLE2_14                                                                                                                                                     | 9.6 | 8.4  | 1.3  | 2.9  |
| 6984 AT4G35985.1   senescence/dehydration-associated protein-related, similar to senescence-associated protein 12 (Hemerocallis hybrid cultivar) gi:3551958:gb:AAC34857; similar to early-responsive to dehydration stress ERD7 protein (Arabidopsis thaliana) gi:15320412:dbj:BAB63916   chr4:17032271-17033865 REVERSE   Aliases: None                                                                                   | 9.6 | 10.5 | -0.9 | -3.5 |
| 10332 AT1G70490.3   ADP-ribosylation factor, putative, nearly identical to ADP-ribosylation factor 1 GB:P36397 (Arabidopsis thaliana), ADP-ribosylation factor GI:166586 (Arabidopsis thaliana)   chr1:26567590-26569453 REVERSE   Aliases: F24J13.6, F24J13_6                                                                                                                                                             | 9.6 | 8.6  | 1.0  | 2.3  |
| 7690 AT4G13780.1   methionine--tRNA ligase, putative / methionyl-tRNA synthetase, putative / MetRS, putative, similar to methionyl-tRNA synthetase (Oryza sativa) GI:4091008; contains Pfam profiles PF00133: tRNA synthetases class I (I, L, M and V), PF01588: Putative tRNA binding domain   chr4:7993198-7998511 REVERSE   Aliases: F18A5.170, F18A5_170                                                               | 9.6 | 8.8  | 0.8  | 3.2  |
| 377 AT2G24190.1   short-chain dehydrogenase/reductase (SDR) family protein, contains INTERPRO family IPR002198 short-chain dehydrogenase/reductase (SDR) superfamily   chr2:10290820-10292014 REVERSE   Aliases: F27D4.10, F27D4_10                                                                                                                                                                                        | 9.6 | 6.1  | 3.6  | 13.1 |



|                                                                                                                                                                                                                                                                                                                                                                                                                                |     |      |      |      |
|--------------------------------------------------------------------------------------------------------------------------------------------------------------------------------------------------------------------------------------------------------------------------------------------------------------------------------------------------------------------------------------------------------------------------------|-----|------|------|------|
| 7973 AT3G23640.1   glycosyl hydrolase family 31 protein, similar to alpha-glucosidase II from SP:Q9F234 (Bacillus thermoamyloliquefaciens); contains Pfam profile: PF01055 Glycosyl hydrolases family 31   chr3:8501935-8509591 FORWARD   Aliases: MDB19.14                                                                                                                                                                    | 9.6 | 9.2  | 0.4  | 3.1  |
| 8254 AT4G35000.1   Symbol: APX3   L-ascorbate peroxidase 3 (APX3), identical to ascorbate peroxidase 3 (Arabidopsis thaliana) GI:2444019, L-ascorbate peroxidase (Arabidopsis thaliana) gi:1523791:emb:CAA66926; similar to ascorbate peroxidase (Gossypium hirsutum) gi:1019946:gb:AAB52954   chr4:16664827-16667710 REVERSE   Aliases: ASCORBATE PEROXIDASE 3, M4E13.60, M4E13_60                                            | 9.6 | 7.7  | 1.9  | 3.0  |
| 6531 AT2G47610.1   60S ribosomal protein L7A (RPL7aA)   chr2:19536860-19538725 FORWARD   Aliases: T30B22.8                                                                                                                                                                                                                                                                                                                     | 9.6 | 7.8  | 1.8  | 3.7  |
| 8084 AT5G16050.1   Symbol: GRF5   14-3-3 protein GF14 epsilon (GRF5), identical to 14-3-3 protein GF14 epsilon GI:2232148 from (Arabidopsis thaliana)   chr5:5243748-5245814 REVERSE   Aliases: F1N13.190, F1N13_190, GF14 UPSILON, GF14 UPSILON CHAIN                                                                                                                                                                         | 9.6 | 7.7  | 1.9  | 3.1  |
| 14198 AT3G09810.1   Symbol: AT3G09805   isocitrate dehydrogenase, putative / NAD+ isocitrate dehydrogenase, putative, strong similarity to isocitrate dehydrogenase (NAD+) GB:CAA65502 GI:3021506 (Nicotiana tabacum)   chr3:3008699-3011442 FORWARD   Aliases: AT3G09805, F8A24.14, F8A24_14                                                                                                                                  | 9.6 | 8.7  | 0.9  | 1.3  |
| 5473 AT5G55070.1   2-oxoacid dehydrogenase family protein, similar to SP:Q01205 Dihydrolipoamide succinyltransferase component of 2-oxoglutarate dehydrogenase complex, mitochondrial precursor (EC 2.3.1.61) {Rattus norvegicus}; contains Pfam profiles PF00198: 2-oxo acid dehydrogenases acyltransferase (catalytic domain), PF00364: Biotin-requiring enzyme   chr5:22364490-22368043 FORWARD   Aliases: MCO15.2, MCO15_2 | 9.6 | 7.3  | 2.3  | 4.3  |
| 1804 AT3G60210.1   chloroplast chaperonin 10, putative, similar to chloroplast chaperonin 10 GI:14041813 from (Arabidopsis thaliana)   chr3:22262219-22263800 REVERSE   Aliases: F27H5.5                                                                                                                                                                                                                                       | 9.6 | 6.3  | 3.3  | 7.7  |
| 9131 AT1G09330.1   expressed protein, contains 3 transmembrane domains; contains Pfam profile PF05832: Eukaryotic protein of unknown function   chr1:3012764-3015093 REVERSE   Aliases: T31J12.5, T31J12_5                                                                                                                                                                                                                     | 9.6 | 8.9  | 0.7  | 2.7  |
| 528 AT2G23930.1   small nuclear ribonucleoprotein G, putative / snRNP-G, putative / Sm protein G, putative, similar to small nuclear ribonucleoprotein G (snRNP-G, Sm protein G, Sm-G, SmG) (Homo sapiens) SWISS-PROT:Q15357   chr2:10189345-10190320 FORWARD   Aliases: T29E15.13, T29E15_13                                                                                                                                  | 9.6 | 7.2  | 2.4  | 11.8 |
| 4407 AT5G65660.1   hydroxyproline-rich glycoprotein family protein   chr5:26262475-26263605 REVERSE   Aliases: K21L13.18, K21L13_18                                                                                                                                                                                                                                                                                            | 9.6 | 10.8 | -1.2 | -4.9 |
| 3934 AT5G17990.1   Symbol: TRP1   anthranilate phosphoribosyltransferase, identical to anthranilate phosphoribosyltransferase, chloroplast precursor (EC 2.4.2.18) SP:Q02166 from (Arabidopsis thaliana)   chr5:5957215-5959906 FORWARD   Aliases: MCM23.6, MCM23_6, PAT1, PHOSPHORIBOSYLANTHRANILATE TRANSFERASE, PHOSPHORIBOSYLANTHRANILATE TRANSFERASE 1, TRYPTOPHAN BIOSYNTHESIS 1                                         | 9.6 | 7.2  | 2.4  | 5.3  |
| 2809 AT2G40060.1   expressed protein   chr2:16733562-16735263 FORWARD   Aliases: T28M21.22, T28M21_22                                                                                                                                                                                                                                                                                                                          | 9.6 | 8.6  | 1.0  | 6.4  |
| 21047 AT4G34450.1   coatamer gamma-2 subunit, putative / gamma-2 coat protein, putative / gamma-2 COP, putative, similar to SP:Q9UBF2 Coatamer gamma-2 subunit (Gamma-2 coat protein) (Gamma-2 COP) {Homo sapiens}; contains Pfam profile: PF01602 Adaptin N terminal region                                                                                                                                                   | 9.6 | 9.6  | 0.0  | 0.0  |
| 7878 AT5G52540.1   expressed protein, contains PF05684: Protein of unknown function (DUF819)   chr5:21338654-21341006 REVERSE   Aliases: F6N7.1, F6N7_1                                                                                                                                                                                                                                                                        | 9.6 | 7.4  | 2.2  | 3.2  |
| 6599 AT3G02770.1   dimethylmenaquinone methyltransferase family protein, similar to bacterial S-adenosylmethionine:2-demethylmenaquinone methyltransferases; contains Pfam profile PF03737: Dimethylmenaquinone methyltransferase   chr3:600900-602218 REVERSE   Aliases: F13E7.29, F13E7_29                                                                                                                                   | 9.6 | 8.4  | 1.1  | 3.7  |
| 1015 AT2G20060.1   ribosomal protein L4 family protein, contains Pfam profile PF00573: ribosomal protein L4/L1 family   chr2:8666124-8668562 FORWARD   Aliases: T2G17.14, T2G17_14                                                                                                                                                                                                                                             | 9.6 | 6.4  | 3.2  | 9.5  |
| 8356 AT3G18780.2   Symbol: ACT2   actin 2 (ACT2), identical to SP:Q96292 Actin 2 {Arabidopsis thaliana}; nearly identical to SP:Q96293 Actin 8 (Arabidopsis thaliana) GI:1669387 and to At1g49240   chr3:6474877-6477210 FORWARD   Aliases: ACTIN 2, ACTIN2, DEFORMED ROOT HAIRS 1, DER1, LIGHT STRESS REGULATED 2, LSR2, MVE11.16                                                                                             | 9.6 | 10.9 | -1.3 | -3.0 |
| 1905 AT3G03150.1   expressed protein   chr3:727561-729467 REVERSE   Aliases: T17B22.16, T17B22_16                                                                                                                                                                                                                                                                                                                              | 9.6 | 7.0  | 2.5  | 7.5  |
| 8408 AT1G77370.1   glutaredoxin, putative, similar to glutaredoxin (Ricinus communis) gi:1732424:emb:CAA89699   chr1:29078741-29079683 FORWARD   Aliases: F2P24.8, F2P24_8                                                                                                                                                                                                                                                     | 9.6 | 10.3 | -0.7 | -2.9 |
| 17065 AT4G21580.2   similar to NADP-dependent oxidoreductase, putative [Arabidopsis thaliana] (TAIR:At5g61510.1); similar to Putative quinone oxidoreductase [Oryza sativa] (GB:AAK98702.1); contains InterPro domain Zinc-containing alcohol dehydrogenase superfamily (InterPro:IPR002085)                                                                                                                                   | 9.6 | 9.3  | 0.3  | 0.8  |
| 2712 AT1G22450.1   Symbol: COX6B   cytochrome c oxidase subunit 6b, putative (COX6b), nearly identical to subunit 6b of cytochrome c oxidase (Arabidopsis thaliana) GI:6518353   chr1:7925303-7927267 FORWARD   Aliases: ATCOX6B2, CYTOCHROME C OXIDASE 6B, F12K8.20, F12K8_20, SUBUNIT 6B OF CYTOCHROME C OXIDASE                                                                                                             | 9.6 | 7.8  | 1.8  | 6.5  |

|                                                                                                                                                                                                                                                                                                                                                                                                                                                                                                                             |     |      |      |      |
|-----------------------------------------------------------------------------------------------------------------------------------------------------------------------------------------------------------------------------------------------------------------------------------------------------------------------------------------------------------------------------------------------------------------------------------------------------------------------------------------------------------------------------|-----|------|------|------|
| 2638 AT2G40430.1   expressed protein, identical to Protein At2g40430 (Swiss-Prot:O22892) (Arabidopsis thaliana); similar to Glioma tumor suppressor candidate region gene 2 protein (p60) (Swiss-Prot:Q9NZM5) (Homo sapiens)   chr2:16886297-16889505 REVERSE   Aliases: T2P4.22                                                                                                                                                                                                                                            | 9.6 | 8.3  | 1.3  | 6.5  |
| 14831 AT3G52850.1   Symbol: ATELP1                                                                                                                                                                                                                                                                                                                                                                                                                                                                                          | 9.6 | 9.1  | 0.5  | 1.2  |
| 13464 AT5G23760.1   heavy-metal-associated domain-containing protein, Pfam profile PF00403: Heavy-metal-associated domain   chr5:8013090-8014231 REVERSE   Aliases: MRO11.20, MRO11_20                                                                                                                                                                                                                                                                                                                                      | 9.6 | 9.2  | 0.4  | 1.5  |
| 13067 AT2G39780.1   Symbol: RNS2   ribonuclease 2 (RNS2), identical to ribonuclease 2 precursor SP:P42814, GI:289210; contains a ribonuclease T2 family histidine active site signature (PDOC00459)                                                                                                                                                                                                                                                                                                                         | 9.6 | 10.1 | -0.6 | -1.6 |
| 15799 AT2G35120.1   glycine cleavage system H protein, mitochondrial, putative, similar to SP:Q39732 Glycine cleavage system H protein, mitochondrial precursor {Flaveria anomala}; contains Pfam profile PF01597: Glycine cleavage H-protein   chr2:14812718-14814415 REVERSE   Aliases: T4C15.21, T4C15_21                                                                                                                                                                                                                | 9.6 | 8.9  | 0.7  | 1.0  |
| 14242 AT1G11860.2   aminomethyltransferase, putative, similar to aminomethyltransferase, mitochondrial precursor SP:O49849 from (Flaveria anomala)   chr1:4001294-4003441 FORWARD   Aliases: F12F1.30, F12F1_30                                                                                                                                                                                                                                                                                                             | 9.6 | 9.9  | -0.3 | -1.3 |
| 468 AT5G06290.1   2-cys peroxiredoxin, chloroplast, putative, very strong similarity to SP:Q96291 2-cys peroxiredoxin BAS1, chloroplast precursor {Arabidopsis thaliana}; contains Pfam profile: PF00578 AhpC/TSA (alkyl hydroperoxide reductase and thiol-specific antioxidant) family   chr5:1919249-1921404 FORWARD   Aliases: MHF15.19, MHF15_19                                                                                                                                                                        | 9.6 | 4.9  | 4.7  | 12.2 |
| 8735 AT3G05970.1   Symbol: LACS6   long-chain-fatty-acid--CoA ligase / long-chain acyl-CoA synthetase (LACS6), strong similarity to AMP-binding protein (MF39P) gi:1617274 from Brassica napus, similar to putative long-chain-fatty-acid--CoA ligase (brain isozyme) GB:P33124 (Rattus norvegicus); contains Pfam AMP-binding enzyme domain PF00501; identical to cDNA AtLACS6 for long-chain acyl-CoA synthetase GI:22531705   chr3:1786324-1791808 REVERSE   Aliases: F2O10.7, F2O10_7, LONG CHAIN ACYL COA SYNTHETASE 6 | 9.6 | 9.9  | -0.4 | -2.8 |
| 21058 AT5G28050.2   similar to cytidine/deoxycytidylate deaminase family protein [Arabidopsis thaliana] (TAIR:At3g05300.1); similar to putative cytidine deaminase; putative deoxycytidylate deaminase [Cicer arietinum] (GB:CAA07230.1); contains InterPro domain Cytidine/deoxycytidylate deaminase, zinc-binding region (InterPro:IPR002125)   chr5:10043918-10045886 REVERSE   Aliases: F15F15.120, F15F15_120                                                                                                          | 9.6 | 9.6  | -0.0 | -0.0 |
| 19951 AT2G31400.1   pentatricopeptide (PPR) repeat-containing protein, low similarity to fertility restorer (Petunia x hybrida) GI:22128587, post-transcriptional control of chloroplast gene expression CRP1 (Zea mays) GI:3289002; contains Pfam profile PF01535: PPR repeat   chr2:13394081-13397783 REVERSE   Aliases: T28P16.11, T28P16_11                                                                                                                                                                             | 9.6 | 9.6  | -0.0 | -0.2 |
| 2993 AT3G11510.1   40S ribosomal protein S14 (RPS14B), similar to 40S ribosomal protein S14 GB:P19950 (Zea mays)   chr3:3623463-3624945 REVERSE   Aliases: F24K9.19                                                                                                                                                                                                                                                                                                                                                         | 9.6 | 6.3  | 3.2  | 6.1  |
| 6872 AT4G35230.1   protein kinase family protein, contains protein kinase domain, Pfam:PF00069   chr4:16755123-16758096 REVERSE   Aliases: F23E12.210, F23E12_210                                                                                                                                                                                                                                                                                                                                                           | 9.6 | 8.8  | 0.8  | 3.6  |
| 1925 AT5G58490.1   cinnamoyl-CoA reductase family, similar to cinnamoyl-CoA reductase from Pinus taeda (GI:17978649), Eucalyptus gunnii (GI:2058311)   chr5:23660248-23661824 FORWARD   Aliases: MQJ2.6, MQJ2_6                                                                                                                                                                                                                                                                                                             | 9.6 | 6.3  | 3.2  | 7.5  |
| 5519 AT2G23340.1   encodes a member of the DREB subfamily A-5 of ERF/AP2 transcription factor family. The protein contains one AP2 domain. There are 16 members in this subfamily including RAP2.1, RAP2.9 and RAP2.10.   chr2:9945079-9945953 FORWARD   Aliases: T20D16.3, T20D16_3                                                                                                                                                                                                                                        | 9.6 | 11.4 | -1.9 | -4.3 |
| 1703 AT3G19740.1   similar to AAA-type ATPase family protein [Arabidopsis thaliana] (TAIR:At1g50140.1); similar to spastin-like [Oryza sativa (japonica cultivar-group)] (GB:BAD37292.1); contains InterPro domain AAA ATPase (InterPro:IPR003593); contains InterPro domain AAA ATPase, central region (InterPro:IPR003959)   chr3:6855843-6859040 REVERSE   Aliases: MMB12.22                                                                                                                                             | 9.6 | 8.3  | 1.3  | 7.9  |
| 18642 AT3G01520.1   universal stress protein (USP) family protein, similar to ER6 protein (GI:5669654) (Lycopersicon esculentum); contains Pfam profile PF00582: universal stress protein family   chr3:208446-210110 FORWARD   Aliases: F4P13.7, F4P13_7                                                                                                                                                                                                                                                                   | 9.6 | 9.8  | -0.2 | -0.5 |
| 1229 AT2G01090.1   ubiquinol-cytochrome C reductase complex 7.8 kDa protein, putative / mitochondrial hinge protein, putative, similar to SP:P48504 Ubiquinol-cytochrome C reductase complex 7.8 kDa protein (EC 1.10.2.2) (Mitochondrial hinge protein) (CR7) {Solanum tuberosum}; contains Pfam profile PF02320: Ubiquinol-cytochrome C reductase hinge protein   chr2:80014-81200 FORWARD   Aliases: F23H14.6, F23H14_6                                                                                                  | 9.6 | 6.8  | 2.8  | 8.9  |
| 15623 AT5G58020.1   expressed protein, contains PF04641: Protein of unknown function, DUF602                                                                                                                                                                                                                                                                                                                                                                                                                                | 9.6 | 9.2  | 0.4  | 1.0  |
| 867 AT3G17300.1   expressed protein   chr3:5907240-5908898 FORWARD   Aliases: MGD8.14                                                                                                                                                                                                                                                                                                                                                                                                                                       | 9.6 | 6.9  | 2.7  | 10.0 |

|                                                                                                                                                                                                                                                                                                                                                                                                                                                                                |     |      |      |       |
|--------------------------------------------------------------------------------------------------------------------------------------------------------------------------------------------------------------------------------------------------------------------------------------------------------------------------------------------------------------------------------------------------------------------------------------------------------------------------------|-----|------|------|-------|
| 14044 AT1G53580.2   similar to hydroxyacylglutathione hydrolase, cytoplasmic / glyoxalase II (GLX2-2) [Arabidopsis thaliana] (TAIR:At3g10850.1); similar to putative glyoxalase II [Oryza sativa (japonica cultivar-group)] (GB:NP_916812.1); contains InterPro domain Beta-lactamase-like (InterPro:IPR001279)   chr1:19994943-19996898 REVERSE   Aliases: F22G10.9, T3F20.11, T3F20_11                                                                                       | 9.6 | 10.0 | -0.4 | -1.4  |
| 1454 AT5G56940.1   ribosomal protein S16 family protein, contains Pfam profile PF00886: ribosomal protein S16   chr5:23048027-23049637 FORWARD   Aliases: MHM17.5, MHM17_5                                                                                                                                                                                                                                                                                                     | 9.6 | 7.4  | 2.2  | 8.3   |
| 14352 AT1G55840.1   SEC14 cytosolic factor (SEC14) / phosphoglyceride transfer protein, similar to polyphosphoinositide binding protein SEC14 homolog Ssh1p (GB:AAB94598) (Glycine max); identified in Eur J Biochem 1998 Dec 1;258(2):402-10 as AtSEC14, characterized by functional complementation in S. cerevisiae.   chr1:20877268-20879938 FORWARD   Aliases: F14J16.8, F14J16_8                                                                                         | 9.6 | 8.9  | 0.6  | 1.3   |
| 20810 AT1G08480.1   expressed protein   chr1:2684237-2685620 FORWARD   Aliases: T27G7.26                                                                                                                                                                                                                                                                                                                                                                                       | 9.6 | 9.6  | -0.0 | -0.1  |
| 10862 AT1G23490.1   Symbol: ATARF/ATARF1/ATARFA1A   Gene encoding ADP-ribosylation factor and similar to other ARFs and ARF-like proteins. Members of this family are known to be essential for vesicle coating and uncoating and functions in GTP-binding. The gene is shown to play a role in cell division, cell expansion and cellulose production using antisense construct.   chr1:8336693-8338661 FORWARD   Aliases: ATARF, ATARF1, ATARFA1A, F28C11.12, F5O8.5, F5O8_5 | 9.5 | 8.9  | 0.7  | 2.1   |
| 586 AT5G40730.1   Symbol: AGP24   arabinogalactan-protein (AGP24)                                                                                                                                                                                                                                                                                                                                                                                                              | 9.5 | 12.7 | -3.2 | -11.4 |
| 6843 AT1G68790.1   expressed protein   chr1:25838372-25842982 REVERSE   Aliases: F14K14.10, F14K14_10                                                                                                                                                                                                                                                                                                                                                                          | 9.5 | 7.5  | 2.0  | 3.6   |
| 2161 AT1G34430.1   Symbol: EMB3003   dihydrolipoamide S-acetyltransferase, putative, similar to dihydrolipoamide S-acetyltransferase (LTA2) (Arabidopsis thaliana) GI:5881963; contains Pfam profiles PF00198: 2-oxo acid dehydrogenases acyltransferase (catalytic domain), PF00364: Biotin-requiring enzyme, PF02817: e3 binding domain   chr1:12587730-12590120 REVERSE   Aliases: EMB3003, EMBRYO DEFECTIVE 3003, F12K21.24, F12K21_24                                     | 9.5 | 6.7  | 2.8  | 7.2   |
| 15781 AT2G45950.1   Symbol: ASK20   SKP1 family protein, similar to glycoprotein FP21 SP:P52285 from (Dictyostelium discoideum); contains Pfam profile PF01466: Skp1 family, dimerisation domain   chr2:18911397-18914871 REVERSE   Aliases: ARABIDOPSIS SKP1 LIKE 20, ASK20, F4I18.7                                                                                                                                                                                          | 9.5 | 10.2 | -0.7 | -1.0  |
| 15782 AT3G61415.1   Symbol: ASK21   SKP1 family protein, low similarity to SP:P52285 Glycoprotein FP21 precursor {Dictyostelium discoideum}; contains Pfam profile PF01466: Skp1 family, dimerisation domain   chr3:22733685-22737383 REVERSE   Aliases: ARABIDOPSIS SKP1 LIKE 21, ASK21                                                                                                                                                                                       | 9.5 | 10.2 | -0.7 | -1.0  |
| 255 AT3G27400.1   pectate lyase family protein, similar to pectate lyase GP:7547009 from (Vitis vinifera); contains Pfam profile: PF00544 pectate lyase   chr3:10141560-10144462 FORWARD   Aliases: K1G2.22                                                                                                                                                                                                                                                                    | 9.5 | 2.2  | 7.3  | 15.2  |
| 853 AT2G44460.1   glycosyl hydrolase family 1 protein, contains Pfam PF00232 : Glycosyl hydrolase family 1 domain; TIGRFAM TIGR01233: 6-phospho-beta-galactosidase; similar to beta-glucosidase 1 (GI:12043529) (Arabidopsis thaliana)   chr2:18353576-18357042 FORWARD   Aliases: F4I1.27                                                                                                                                                                                     | 9.5 | 3.3  | 6.2  | 10.1  |
| 4495 AT5G55920.1   nucleolar protein, putative, similar to SP:P46087 Proliferating-cell nucleolar antigen p120 (Proliferation-associated nucleolar protein p120) {Homo sapiens}, SP:P40991 Nucleolar protein NOP2 {Saccharomyces cerevisiae}; contains Pfam profile PF01189: NOL1/NOP2/sun family   chr5:22662709-22666673 REVERSE   Aliases: None                                                                                                                             | 9.5 | 8.2  | 1.3  | 4.9   |
| 8475 AT1G27450.2   Symbol: APT1   adenine phosphoribosyltransferase 1 (APT1), nearly identical to SP:P31166 Adenine phosphoribosyltransferase 1 (EC 2.4.2.7) (APRT) {Arabidopsis thaliana}                                                                                                                                                                                                                                                                                     | 9.5 | 7.4  | 2.1  | 2.9   |
| 439 AT2G37660.1   expressed protein   chr2:15802392-15804137 REVERSE   Aliases: F13M22.16, F13M22_16                                                                                                                                                                                                                                                                                                                                                                           | 9.5 | 5.7  | 3.8  | 12.5  |
| 7985 AT5G65780.1   branched-chain amino acid aminotransferase 5 / branched-chain amino acid transaminase 5 (BCAT5), nearly identical to SP:Q9FYA6 Branched-chain amino acid aminotransferase 5, chloroplast precursor (EC 2.6.1.42) (Atbcat-5) {Arabidopsis thaliana}; contains Pfam profile: PF01063 aminotransferase class IV   chr5:26332616-26335980 FORWARD   Aliases: MPA24.13, MPA24_13                                                                                 | 9.5 | 7.8  | 1.7  | 3.1   |
| 19800 AT1G11360.2   universal stress protein (USP) family protein, contains Pfam PF00582: universal stress protein family domain; similar to ethylene-responsive ER6 protein (GI:5669654) (Lycopersicon esculentum)   chr1:3821529-3823053 REVERSE   Aliases: T23J18.35, T23J18_35                                                                                                                                                                                             | 9.5 | 9.5  | 0.1  | 0.2   |
| 6373 AT5G55000.2   Symbol: FIP2   potassium channel tetramerisation domain-containing protein / pentapeptide repeat-containing protein, contains Pfam profiles PF02214: K+ channel tetramerisation domain, PF00805: Pentapeptide repeats (8 copies)   chr5:22335536-22338973 FORWARD   Aliases: MBG8.27, MBG8_27                                                                                                                                                               | 9.5 | 7.4  | 2.1  | 3.8   |
| 8447 AT5G08530.1   NADH-ubiquinone oxidoreductase 51 kDa subunit, mitochondrial, putative, similar to NADH-ubiquinone oxidoreductase 51 kDa subunit, mitochondrial precursor (EC 1.6.5.3) (EC 1.6.99.3) from {Homo sapiens} SP:P49821, {Bos taurus} SP:P25708, {Aspergillus niger} SP:Q92406; contains Pfam profile PF01512: Respiratory-chain NADH dehydrogenase 51 Kd subunit   chr5:2759320-2761860 REVERSE   Aliases: MAH20.9, MAH20_9                                     | 9.5 | 8.6  | 1.0  | 2.9   |



|                                                                                                                                                                                                                                                                                                                                                                                                                 |     |      |      |      |
|-----------------------------------------------------------------------------------------------------------------------------------------------------------------------------------------------------------------------------------------------------------------------------------------------------------------------------------------------------------------------------------------------------------------|-----|------|------|------|
| 277 AT5G53580.1   aldo/keto reductase family protein, contains Pfam profile PF00248: oxidoreductase, aldo/keto reductase family   chr5:21782305-21784210 REVERSE   Aliases: MNC6.12, MNC6_12                                                                                                                                                                                                                    | 9.5 | 5.0  | 4.5  | 14.8 |
| 281 AT2G40100.1   Symbol: LHCB4.3   chlorophyll A-B binding protein (LHCB4.3), identical to Lhcb4:3 protein (Arabidopsis thaliana) GI:4741956; contains Pfam profile: PF00504 chlorophyll A-B binding protein   chr2:16752881-16754478 FORWARD   Aliases: F27I1.2, F27I1_2                                                                                                                                      | 9.5 | 3.1  | 6.4  | 14.7 |
| 4703 AT4G31720.2   Symbol: TAFII15   transcription initiation factor IID (TFIID) 23-30kDa subunit (TAF2H) family protein, contains Pfam profile: PF03540 transcription initiation factor TFIID 23-30kDa   chr4:15353958-15356352 REVERSE   Aliases: F28M20.90, F28M20_90                                                                                                                                        | 9.5 | 7.7  | 1.8  | 4.8  |
| 3787 AT1G06570.1   Symbol: PDS1   4-hydroxyphenylpyruvate dioxygenase (HPD), identical to 4-hydroxyphenylpyruvate dioxygenase (HPD) SP:P93836 (Arabidopsis thaliana (Mouse-ear cress))   chr1:2011885-2013544 REVERSE   Aliases: 4 HYDROXYPHENYLPYRUVATE DIOXYGENASE, F12K11.9, F12K11_9, HPD, P HYDROXYPHENYLPYRUVATE DIOXYGENASE, PHYTOENE DESATURATION 1                                                     | 9.5 | 6.9  | 2.7  | 5.4  |
| 4240 AT3G05220.2   heavy-metal-associated domain-containing protein, similar to farnesylated protein 1 (GI:23304411) {Hordeum vulgare subsp. spontaneum}; contains Pfam profile PF00403: Heavy-metal-associated domain   chr3:1489425-1491320 FORWARD   Aliases: T12H1.19, T12H1_19                                                                                                                             | 9.5 | 10.5 | -1.0 | -5.1 |
| 1559 AT3G22840.1   Symbol: ELIP1   chlorophyll A-B binding family protein / early light-induced protein (ELIP), identical to early light-induced protein; ELIP (Arabidopsis thaliana) GI:1872544; contains Pfam profile: PF00504 chlorophyll A-B binding protein; identical to cDNA early light-induced protein GI:1872543                                                                                      | 9.5 | 5.6  | 4.0  | 8.1  |
| 2180 AT1G47250.1   Symbol: PAF2   20S proteasome alpha subunit F2 (PAF2) (PRC2B) (PRS1), identical to GB:AAC32063 from (Arabidopsis thaliana) (Genetics 149 (2), 677-692 (1998)); identical to cDNA proteasome subunit prc2b GI:2511585   chr1:17321617-17324100 FORWARD   Aliases: 20S PROTEASOME SUBUNIT PAF2, F8G22.3, F8G22_3                                                                               | 9.5 | 6.2  | 3.3  | 7.1  |
| 11653 AT5G05100.1   expressed protein   chr5:1505123-1507203 REVERSE   Aliases: MUG13.4, MUG13_4                                                                                                                                                                                                                                                                                                                | 9.5 | 9.8  | -0.3 | -1.9 |
| 12768 AT5G67330.1   Symbol: ATNRAMP4   NRAMP metal ion transporter 4 (NRAMP4), identical to metal transporter Nramp4 (Arabidopsis thaliana) gi:6468014:gb:AAF13279; member of the natural resistance-associated macrophage protein (NRAMP) metal transporter family, PMID:11500563   chr5:26878955-26881123 FORWARD   Aliases: K8K14.5, K8K14_5, METAL TRANSPORTER NRAMP4, NRAMP4                               | 9.5 | 10.1 | -0.5 | -1.6 |
| 11591 AT3G52560.2   ubiquitin-conjugating enzyme family protein, similar to DNA-binding protein CROC-1B (Homo sapiens) GI:1066082; contains Pfam profile PF00179: Ubiquitin-conjugating enzyme   chr3:19505362-19507058 REVERSE   Aliases: F3C22.2                                                                                                                                                              | 9.5 | 8.5  | 1.0  | 1.9  |
| 3263 AT2G27190.1   Symbol: PAP1   iron(III)-zinc(II) purple acid phosphatase (PAP12), identical to iron(III)-zinc(II) purple acid phosphatase (precursor) SP:Q38924 from (Arabidopsis thaliana)   chr2:11628304-11630534 REVERSE   Aliases: PURPLE ACID PHOSPHATASE 1, SECRETED PURPLE ACID PHOSPHATASE PRECURSOR, T22O13.4, T22O13_4                                                                           | 9.5 | 8.7  | 0.8  | 5.8  |
| 1418 AT4G22890.3   expressed protein   chr4:12006997-12009529 FORWARD   Aliases: F7H19.70, F7H19_70                                                                                                                                                                                                                                                                                                             | 9.5 | 6.6  | 2.9  | 8.4  |
| 19712 AT3G05760.1   expressed protein   chr3:1707909-1710529 FORWARD   Aliases: F10A16.5, F10A16_5                                                                                                                                                                                                                                                                                                              | 9.5 | 9.6  | -0.1 | -0.3 |
| 13493 AT1G56280.2   Symbol: ATDI19                                                                                                                                                                                                                                                                                                                                                                              | 9.5 | 10.0 | -0.5 | -1.5 |
| 4487 AT4G35490.1   ribosomal protein L11 family protein, several ribosomal proteins L11   chr4:16855907-16856679 FORWARD   Aliases: F15J1.60, F15J1_60                                                                                                                                                                                                                                                          | 9.5 | 7.1  | 2.4  | 4.9  |
| 8021 AT5G04740.1   ACT domain-containing protein, contains Pfam profile PF01842: ACT domain                                                                                                                                                                                                                                                                                                                     | 9.5 | 10.7 | -1.2 | -3.1 |
| 1875 AT5G22650.2   Symbol: HD2B   expressed protein, non-consensus AT donor splice site at exon 3, AC acceptor splice site at exon 4;   chr5:7534067-7536276 FORWARD   Aliases: ATHD2B, HD2, HDA4, HDT02, HDT2, HISTONE DEACETYLASE, HISTONE DEACETYLASE 2, HISTONE DEACETYLASE 2B, MDJ22.7, MDJ22_7                                                                                                            | 9.5 | 7.7  | 1.8  | 7.6  |
| 1295 AT3G56910.1   expressed protein   chr3:21080395-21081312 REVERSE   Aliases: T8M16.240                                                                                                                                                                                                                                                                                                                      | 9.5 | 7.6  | 1.9  | 8.7  |
| 7293 AT2G26170.2   Symbol: CYP711A1   thromboxane-A synthase, putative / cytochrome P450 family protein, similar to Thromboxane-A synthase (TXA synthase) (TXS) (SP:P47787) (Sus scrofa); contains Pfam profile: PF00067: Cytochrome P450; supported by cDNA: gi_15810029_gb_AY054283.1_   chr2:11147899-11150761 FORWARD   Aliases: MAX1, MORE AXILLARY BRANCHES, MORE AXILLARY BRANCHES 1, T1D16.19, T1D16_19 | 9.5 | 8.6  | 0.9  | 3.4  |
| 2350 AT1G30510.3   ferredoxin--NADP(+) reductase, putative / adrenodoxin reductase, putative, strong similarity to SP:P41345 Ferredoxin--NADP reductase, root isozyme, chloroplast precursor (EC 1.18.1.2) (FNR) {Oryza sativa}, ferredoxin-NADP reductase precursor (Zea mays) GI:500751   chr1:10806968-10809144 REVERSE   Aliases: F26G16.13, F26G16_13                                                      | 9.5 | 11.5 | -2.0 | -6.9 |
| 5133 AT4G15940.1   fumarylacetoacetate hydrolase family protein, contains Pfam domain, PF01557: fumarylacetoacetate hydrolase family protein   chr4:9038304-9040758 FORWARD   Aliases: DL4011W, FCAALL.203                                                                                                                                                                                                      | 9.5 | 7.9  | 1.6  | 4.5  |

|                                                                                                                                                                                                                                                                                                                                                                                                                                                                             |     |      |      |       |
|-----------------------------------------------------------------------------------------------------------------------------------------------------------------------------------------------------------------------------------------------------------------------------------------------------------------------------------------------------------------------------------------------------------------------------------------------------------------------------|-----|------|------|-------|
| 1771 AT2G37120.1   DNA-binding S1FA family protein, contains Pfam profile: PF04689 DNA binding protein S1FA                                                                                                                                                                                                                                                                                                                                                                 | 9.5 | 7.7  | 1.8  | 7.8   |
| 1967 AT1G31970.1   DEAD/DEAH box helicase, putative, similar to p68 RNA helicase (Schizosaccharomyces pombe) GI:173419   chr1:11479846-11482870 FORWARD   Aliases: F5M6.3                                                                                                                                                                                                                                                                                                   | 9.5 | 7.7  | 1.8  | 7.5   |
| 9146 AT1G50670.1   OTU-like cysteine protease family protein, contains Pfam profile PF02338: OTU-like cysteine protease   chr1:18778532-18780621 REVERSE   Aliases: F17J6.19, F17J6_19                                                                                                                                                                                                                                                                                      | 9.5 | 8.9  | 0.6  | 2.6   |
| 6198 AT5G40650.1   Symbol: SDH2 2                                                                                                                                                                                                                                                                                                                                                                                                                                           | 9.5 | 7.9  | 1.6  | 3.9   |
| 549 AT3G12740.1   LEM3 (ligand-effect modulator 3) family protein / CDC50 family protein, Similar to GI:4585976; GI:4966357; GI:4835763; GI:9757735 from (Arabidopsis thaliana)   chr3:4049522-4052050 FORWARD   Aliases: MBK21.12                                                                                                                                                                                                                                          | 9.5 | 11.3 | -1.8 | -11.6 |
| 9986 AT1G27130.1   Symbol: ATGSTU13   glutathione S-transferase, putative, similar to glutathione S-transferase GB: AAF22517 GI:6652870 from (Papaver somniferum)   chr1:9425447-9426873 FORWARD   Aliases: GLUTATHIONE S TRANSFERASE 12, GST12, T7N9.190, T7N9_190                                                                                                                                                                                                         | 9.5 | 9.1  | 0.4  | 2.4   |
| 17013 AT1G24510.2   T-complex protein 1 epsilon subunit, putative / TCP-1-epsilon, putative / chaperonin, putative, identical to SWISS-PROT:O04450- T-complex protein 1, epsilon subunit (TCP-1-epsilon) (Arabidopsis thaliana); strong similarity to SP:P54411 T-complex protein 1, epsilon subunit (TCP-1-epsilon) (CCT-epsilon) (TCP-K36) {Avena sativa}; contains Pfam:PF00118 domain, TCP-1/cpn60 chaperonin family   chr1:8685298-8688231 REVERSE   Aliases: F21J9.17 | 9.5 | 9.3  | 0.2  | 0.8   |
| 1073 AT2G06520.1   membrane protein, putative, contains 2 transmembrane domains;   chr2:2587781-2588355 REVERSE   Aliases: T12H3.7, T12H3_7                                                                                                                                                                                                                                                                                                                                 | 9.5 | 4.7  | 4.8  | 9.3   |
| 7104 AT2G45820.1   DNA-binding protein, putative, identical to DNA-binding protein gi:601843:gb:AAA57124 (Arabidopsis thaliana); contains Pfam domain, PF03766: Remorin, N-terminal region; contains Pfam domain, PF03763: Remorin, C-terminal region   chr2:18870032-18871735 REVERSE   Aliases: F4I18.20                                                                                                                                                                  | 9.5 | 10.3 | -0.8 | -3.5  |
| 17898 AT4G39730.1   lipid-associated family protein, contains PLAT/LH2 (Polycystin-1, Lipoxygenase, Alpha-Toxin/Lipoxygenase homology) domain Pfam:PF01477   chr4:18432893-18433689 FORWARD   Aliases: T19P19.120, T19P19_120                                                                                                                                                                                                                                               | 9.5 | 9.3  | 0.2  | 0.6   |
| 11701 AT2G20360.1   expressed protein   chr2:8793096-8796554 FORWARD   Aliases: F11A3.9, F11A3_9                                                                                                                                                                                                                                                                                                                                                                            | 9.5 | 7.9  | 1.5  | 1.9   |
| 9605 AT5G09830.1   BolA-like family protein, contains Pfam profile: PF01722 BolA-like protein   chr5:3057658-3058822 REVERSE   Aliases: MYH9.4, MYH9_4                                                                                                                                                                                                                                                                                                                      | 9.5 | 9.0  | 0.5  | 2.5   |
| 10823 AT5G17190.1   expressed protein, similar to unknown protein (gb:AAF26109.1)   chr5:5652225-5652985 FORWARD   Aliases: MKP11.4, MKP11_4                                                                                                                                                                                                                                                                                                                                | 9.5 | 8.5  | 1.0  | 2.1   |
| 3801 AT3G02520.1   Symbol: GRF7   14-3-3 protein GF14 nu (GRF7), identical to 14-3-3 protein GF14 nu GI:1531631 from (Arabidopsis thaliana)   chr3:526444-528320 REVERSE   Aliases: F16B3.15, F16B3_15, GF14 NU                                                                                                                                                                                                                                                             | 9.5 | 6.4  | 3.1  | 5.4   |
| 3779 AT1G31340.1   Symbol: RUB1   ubiquitin family protein, contains INTERPRO:IPR000626 ubiquitin domain   chr1:11217865-11219437 REVERSE   Aliases: ATRUB1, NEDD8, RELATED TO UBIQUITIN 1, T19E23.13, T19E23_13                                                                                                                                                                                                                                                            | 9.5 | 6.6  | 2.9  | 5.4   |
| 7156 ATCG00670.1   Symbol: CLPP1   Encodes the only ClpP (caseinolytic protease) encoded within the plastid genome. Contains a highly conserved catalytic triad of Ser-type proteases (Ser-His-Asp). Part of the 350 kDa chloroplast Clp complex. The name reflects nomenclature described in Adam et. al (2001).                                                                                                                                                           | 9.5 | 7.9  | 1.6  | 3.5   |
| 6712 AT1G53210.1   sodium/calcium exchanger family protein / calcium-binding EF hand family protein, contains Pfam profiles: PF01699 sodium/calcium exchanger protein, PF00036 EF hand   chr1:19848300-19851504 FORWARD   Aliases: F12M16.12, F12M16_12                                                                                                                                                                                                                     | 9.5 | 10.7 | -1.2 | -3.7  |
| 373 AT5G53880.1   expressed protein   chr5:21890020-21890529 REVERSE   Aliases: K19P17.4, K19P17_4                                                                                                                                                                                                                                                                                                                                                                          | 9.5 | 4.1  | 5.4  | 13.2  |
| 1250 AT5G42150.1   expressed protein   chr5:16863378-16865507 FORWARD   Aliases: MJC20.26, MJC20_26                                                                                                                                                                                                                                                                                                                                                                         | 9.5 | 6.7  | 2.8  | 8.8   |
| 21043 AT1G52740.1   histone H2A, putative, similar to histone H2A.F/Z Arabidopsis thaliana GI:2407800; contains Pfam profile PF00125 Core histone H2A/H2B/H3/H4   chr1:19648963-19650099 FORWARD   Aliases: F14G24.1, F14G24_1                                                                                                                                                                                                                                              | 9.5 | 9.5  | -0.0 | -0.0  |
| 2416 AT3G57010.1   strictosidine synthase family protein, similar to strictosidine synthase (Rauvolfia serpentina)(SP:P15324)   chr3:21106633-21108430 REVERSE   Aliases: F24I3.90                                                                                                                                                                                                                                                                                          | 9.5 | 6.6  | 2.9  | 6.8   |
| 9193 AT1G56330.1   Symbol: SAR1   GTP-binding protein (SAR1B), identical to GTP-binding protein (SAR1B) (Arabidopsis thaliana) SP:Q01474   chr1:21090220-21092214 REVERSE   Aliases: ATSAR1, ATSARA1B, F14G9.6, F14G9_6, SAR LIKE, SARL, SECRETION ASSOCIATED RAS                                                                                                                                                                                                           | 9.5 | 8.3  | 1.2  | 2.6   |
| 3405 AT5G16840.1   RNA recognition motif (RRM)-containing protein, predicted proteins - Arabidopsis thaliana   chr5:5535923-5538253 FORWARD   Aliases: F5E19.180, F5E19_180                                                                                                                                                                                                                                                                                                 | 9.5 | 7.2  | 2.2  | 5.7   |
| 3829 AT5G05200.1   ABC1 family protein, contains Pfam domain, PF03109: ABC1 family   chr5:1543606-1547138 REVERSE   Aliases: K2A11.7, K2A11_7                                                                                                                                                                                                                                                                                                                               | 9.5 | 8.5  | 1.0  | 5.4   |

|                                                                                                                                                                                                                                                                                                                                                  |     |      |      |      |
|--------------------------------------------------------------------------------------------------------------------------------------------------------------------------------------------------------------------------------------------------------------------------------------------------------------------------------------------------|-----|------|------|------|
| 11246 AT1G10950.1   endomembrane protein 70, putative   chr1:3659216-3663984 FORWARD   Aliases: T19D16.13, T19D16_13                                                                                                                                                                                                                             | 9.5 | 8.9  | 0.6  | 2.0  |
| 814 AT5G14780.1   Symbol: FDH   formate dehydrogenase (FDH), identical to GI:7677266   chr5:4776987-4779497 FORWARD   Aliases: FORMATE DEHYDROGENASE, T9L3.80, T9L3_80                                                                                                                                                                           | 9.5 | 4.9  | 4.5  | 10.2 |
| 2916 AT4G18100.1   60S ribosomal protein L32 (RPL32A), ribosomal protein L32, human, PIR1:R5HU32   chr4:10035497-10036552 REVERSE   Aliases: F15J5.70, F15J5_70                                                                                                                                                                                  | 9.5 | 6.2  | 3.2  | 6.2  |
| 2917 AT5G46430.2   60S ribosomal protein L32 (RPL32B)   chr5:18850494-18851791 FORWARD   Aliases: K11I1.2, K11I1_2                                                                                                                                                                                                                               | 9.5 | 6.2  | 3.2  | 6.2  |
| 10221 AT5G28390.1   RNA recognition motif (RRM)-containing protein, contains InterPro entry IPR000504: RNA-binding region RNP-1 (RNA recognition motif) (RRM)   chr5:10342028-10343001 REVERSE   Aliases: F21B23.40, F21B23_40                                                                                                                   | 9.5 | 10.3 | -0.9 | -2.3 |
| 10220 AT3G52660.2   similar to RNA recognition motif (RRM)-containing protein [Arabidopsis thaliana] (TAIR:At4g00830.1); similar to putative RNA-binding protein [Oryza sativa (japonica cultivar-group)] (GB:AAP52145.1); contains InterPro domain RNA-binding region RNP-1                                                                     | 9.5 | 10.3 | -0.9 | -2.3 |
| 9713 AT1G60810.1   Symbol: ACLA 2                                                                                                                                                                                                                                                                                                                | 9.5 | 8.5  | 1.0  | 2.5  |
| 9960 NA                                                                                                                                                                                                                                                                                                                                          | 9.4 | 7.3  | 2.2  | 2.4  |
| 459 AT3G47860.1   apolipoprotein D-related, contains weak similarity to Apolipoprotein D precursor (ApoD) (Swiss-Prot:P51910) (Mus musculus)   chr3:17667682-17669273 REVERSE   Aliases: T23J7.190                                                                                                                                               | 9.4 | 6.4  | 3.0  | 12.3 |
| 10170 AT5G40670.1   PQ-loop repeat family protein / transmembrane family protein, similar to SP:O60931 Cystinosin {Homo sapiens}; contains Pfam profile PF04193: PQ loop repeat   chr5:16302939-16305013 FORWARD   Aliases: MNF13.23, MNF13_23                                                                                                   | 9.4 | 10.2 | -0.8 | -2.3 |
| 1195 AT2G20450.1   60S ribosomal protein L14 (RPL14A)   chr2:8820947-8822332 FORWARD   Aliases: T13C7.4, T13C7_4                                                                                                                                                                                                                                 | 9.4 | 6.9  | 2.6  | 9.0  |
| 7863 AT1G75750.1   Symbol: GASA1   gibberellin-regulated protein 1 (GASA1) / gibberellin-responsive protein 1, identical to SP:P46689 Gibberellin-regulated protein 1 precursor {Arabidopsis thaliana}; supporting cDNA gi:887938:gb:U11766.1:ATU11766   chr1:28445202-28446023 REVERSE   Aliases: F10A5.6, F10A5_6, GAST1 PROTEIN HOMOLOG       | 9.4 | 10.6 | -1.1 | -3.2 |
| 6204 AT3G51920.1   Symbol: CAM9   calmodulin-9 (CAM9), identical to calmodulin 9 GI:5825602 from (Arabidopsis thaliana); contains Pfam profile PF00036: EF hand   chr3:19279026-19280366 REVERSE   Aliases: CALMODULIN 9, F4F15.30                                                                                                               | 9.4 | 10.2 | -0.8 | -3.9 |
| 7362 AT1G01490.2   similar to heavy-metal-associated domain-containing protein [Arabidopsis thaliana] (TAIR:At5g23760.1); similar to unknown [Populus tremuloides] (GB:AAO63778.1); contains InterPro domain Heavy metal transport/detoxification protein (InterPro:IPR006121)   chr1:180059-182293 REVERSE   Aliases: F22L4.5, F22L4_5          | 9.4 | 10.8 | -1.3 | -3.4 |
| 4283 AT2G38550.1   expressed protein, contains Pfam profile PF03647: Uncharacterised protein family (UPF0136)   chr2:16139092-16141493 FORWARD   Aliases: T6A23.25, T6A23_25                                                                                                                                                                     | 9.4 | 6.9  | 2.5  | 5.0  |
| 10401 AT5G10780.1   expressed protein, HSPC184, Homo sapiens, EMBL:AF151018   chr5:3408347-3410044 FORWARD   Aliases: T30N20.50, T30N20_50                                                                                                                                                                                                       | 9.4 | 8.2  | 1.2  | 2.2  |
| 365 AT5G47680.1   expressed protein, contains Pfam profile PF04243: Protein of unknown function (DUF425)   chr5:19332309-19334748 REVERSE   Aliases: MNJ7.27, MNJ7_27                                                                                                                                                                            | 9.4 | 5.6  | 3.8  | 13.3 |
| 11530 AT1G69410.1   eukaryotic translation initiation factor 5A, putative / eIF-5A, putative, strong similarity to eukaryotic initiation factor 5A (2) (Nicotiana glauca) GI:19702, SP:Q9AXQ6: Eukaryotic translation initiation factor 5A-1 (eIF-5A 1) {Lycopersicon esculentum}   chr1:26092868-26094047 FORWARD   Aliases: F10D13.8, F10D13_8 | 9.4 | 8.6  | 0.8  | 1.9  |
| 17346 AT1G51060.1   histone H2A, putative, similar to histone H2A GI:7595337 from Arabidopsis thaliana, Triticum aestivum GI:536892, Picea abies SP:P35063; contains Pfam profile PF00125 Core histone H2A/H2B/H3/H4                                                                                                                             | 9.4 | 9.2  | 0.2  | 0.7  |
| 11118 AT2G46140.1   late embryogenesis abundant protein, putative / LEA protein, putative, similar to SP:P46518 Late embryogenesis abundant protein Lea14-A {Gossypium hirsutum}; contains Pfam profile PF03168: Late embryogenesis abundant protein                                                                                             | 9.4 | 8.4  | 1.0  | 2.0  |
| 14398 AT1G77840.1   eukaryotic translation initiation factor 5, putative / eIF-5, putative, similar to SP:P55876 Eukaryotic translation initiation factor 5 (eIF-5) {Zea mays}; contains Pfam profiles PF02020: eIF4-gamma/eIF5/eIF2-epsilon, PF01873: Domain found in IF2B/IF5   chr1:29273381-29275480 FORWARD   Aliases: T32E8.15             | 9.4 | 9.0  | 0.4  | 1.3  |
| 2487 AT5G65480.1   expressed protein   chr5:26193247-26195140 FORWARD   Aliases: MNA5.18                                                                                                                                                                                                                                                         | 9.4 | 11.1 | -1.7 | -6.7 |



|                                                                                                                                                                                                                                                                                                                                                                                                                                                                                                                                          |     |      |      |      |
|------------------------------------------------------------------------------------------------------------------------------------------------------------------------------------------------------------------------------------------------------------------------------------------------------------------------------------------------------------------------------------------------------------------------------------------------------------------------------------------------------------------------------------------|-----|------|------|------|
| 848 AT3G62030.1   Symbol: ROC4   peptidyl-prolyl cis-trans isomerase, chloroplast / cyclophilin / rotamase / cyclosporin A-binding protein (ROC4), identical to peptidyl-prolyl cis-trans isomerase, chloroplast precursor, PPIase (cyclophilin, cyclosporin A-binding protein) (Arabidopsis thaliana) SWISS-PROT:P34791; identical to cDNA nuclear-encoded chloroplast stromal cyclophilin (ROC4) GI:405130   chr3:22984585-22986345 FORWARD   Aliases: PEPTIDYLPROLYL ISOMERASE ROC4, ROTAMASE CYCLOPHILIN 4, ROTAMASE CYP 4, T17J13.1 | 9.4 | 5.6  | 3.8  | 10.1 |
| 17530 AT4G24550.2   clathrin adaptor complexes medium subunit family protein, contains Pfam profile: PF00928 adaptor complexes medium subunit family                                                                                                                                                                                                                                                                                                                                                                                     | 9.4 | 9.6  | -0.2 | -0.7 |
| 13755 AT4G21105.1   expressed protein   chr4:11265662-11266982 FORWARD   Aliases: None                                                                                                                                                                                                                                                                                                                                                                                                                                                   | 9.4 | 9.0  | 0.4  | 1.4  |
| 3266 AT1G07040.1   expressed protein   chr1:2160944-2163302 REVERSE   Aliases: F10K1.25, F10K1_25                                                                                                                                                                                                                                                                                                                                                                                                                                        | 9.4 | 6.9  | 2.5  | 5.8  |
| 5241 AT1G02560.1   Symbol: CLPP5   ATP-dependent Clp protease proteolytic subunit (ClpP1), identical to nClpP1 GB:BAA82065 GI:5360579 from (Arabidopsis thaliana); contains Pfam profile PF00574: Clp protease; contains TIGRFam profile TIGR00493: ATP-dependent Clp protease, proteolytic subunit ClpP   chr1:537888-540109 FORWARD   Aliases: CLP PROTEASE 1 PROTEOLYTIC SUBUNIT, NCLPP1, NCLPP5, NUCLEAR ENCODED CLP PROTEASE 1, T14P4.12, T14P4_12                                                                                  | 9.4 | 7.2  | 2.2  | 4.4  |
| 6475 AT5G08570.1   pyruvate kinase, putative, similar to pyruvate kinase, cytosolic isozyme (Glycine max) SWISS-PROT:Q42806                                                                                                                                                                                                                                                                                                                                                                                                              | 9.4 | 7.9  | 1.6  | 3.8  |
| 9312 AT5G38530.1   tryptophan synthase-related, low similarity to tryptophan synthases, beta subunit, from Lactococcus lactis (SP:Q01998), Pyrococcus kodakaraensis (SP:Q9YGB0), Thermus thermophilus (SP:P16609); contains Pfam pyridoxal-phosphate dependent enzyme domain PF00291   chr5:15441269-15443700 FORWARD   Aliases: MBB18.6, MBB18_6                                                                                                                                                                                        | 9.4 | 8.2  | 1.2  | 2.6  |
| 4413 AT3G18490.1   aspartyl protease family protein, contains Pfam domain, PF00026: eukaryotic aspartyl protease   chr3:6348761-6350674 REVERSE   Aliases: MYF24.39                                                                                                                                                                                                                                                                                                                                                                      | 9.4 | 7.9  | 1.5  | 4.9  |
| 2624 AT5G57290.1   60S acidic ribosomal protein P3 (RPP3B)   chr5:23224055-23225121 REVERSE   Aliases: MJB24.10, MJB24_10                                                                                                                                                                                                                                                                                                                                                                                                                | 9.4 | 6.9  | 2.5  | 6.6  |
| 1160 AT3G55280.1   60S ribosomal protein L23A (RPL23aB), various ribosomal L23a proteins   chr3:20511312-20512686 FORWARD   Aliases: T26I12.160                                                                                                                                                                                                                                                                                                                                                                                          | 9.4 | 5.9  | 3.5  | 9.1  |
| 14259 AT1G05850.1   Symbol: ELP   chitinase-like protein 1 (CTL1), similar to class I chitinase GI:7798656 from (Halimolobos perplexa var. perplexa); contains Pfam profile PF00182: Chitinase class I; identical to cDNA chitinase-like protein 1 (CTL1) CTL1-ELP1 allele GI:17226328   chr1:1766502-1768662 REVERSE   Aliases: CHITINASE LIKE PROTEIN 1, CTL1, ECTOPIC DEPOSITION OF LIGNIN IN PITH, ELP1, T20M3.12, T20M3_12                                                                                                          | 9.4 | 10.1 | -0.7 | -1.3 |
| 10975 AT1G43900.1   protein phosphatase 2C, putative / PP2C, putative, similar to protein phosphatase type 2C GI:4336436 from (Lotus japonicus)   chr1:16656485-16658885 FORWARD   Aliases: F9C16.6, F9C16_6                                                                                                                                                                                                                                                                                                                             | 9.4 | 9.0  | 0.4  | 2.1  |
| 10841 AT4G04770.1   Symbol: ATABC1                                                                                                                                                                                                                                                                                                                                                                                                                                                                                                       | 9.4 | 8.8  | 0.6  | 2.1  |
| 15696 AT2G28840.1   ankyrin repeat family protein, contains ankyrin repeats, Pfam:PF00023   chr2:12385436-12387819 FORWARD   Aliases: F8N16.13, F8N16_13                                                                                                                                                                                                                                                                                                                                                                                 | 9.4 | 9.7  | -0.3 | -1.0 |
| 3710 AT4G34710.2   Symbol: ADC2   arginine decarboxylase 2 (SPE2), identical to SP:O23141 Arginine decarboxylase 2 (EC 4.1.1.19) (ARGDC 2) (ADC 2) (ADC-N) {Arabidopsis thaliana}   chr4:16560067-16562936 REVERSE   Aliases: ARGININE DECARBOXYLASE, ARGININE DECARBOXYLASE 2, SPE2, T4L20.290, T4L20_290                                                                                                                                                                                                                               | 9.4 | 7.7  | 1.7  | 5.5  |
| 4384 AT5G05160.1   leucine-rich repeat transmembrane protein kinase, putative   chr5:1528001-1530063 FORWARD   Aliases: K2A11.3, K2A11_3                                                                                                                                                                                                                                                                                                                                                                                                 | 9.4 | 8.3  | 1.1  | 5.0  |
| 6146 AT1G16180.1   TMS membrane family protein / tumour differentially expressed (TDE) family protein, contains Pfam domain, PF03348: TMS membrane protein/tumour differentially expressed protein (TDE)   chr1:5540899-5542896 FORWARD   Aliases: T24D18.26, T24D18_26                                                                                                                                                                                                                                                                  | 9.4 | 11.2 | -1.8 | -3.9 |
| 9917 AT5G18310.2   expressed protein, predicted proteins, Drosophila melanogaster   chr5:6061734-6063024 FORWARD   Aliases: F20L16.30, F20L16_30                                                                                                                                                                                                                                                                                                                                                                                         | 9.4 | 10.0 | -0.6 | -2.4 |
| 3467 AT4G23885.1   expressed protein   chr4:12419404-12420477 FORWARD   Aliases: None                                                                                                                                                                                                                                                                                                                                                                                                                                                    | 9.4 | 8.2  | 1.2  | 5.7  |
| 3633 AT4G16370.1   Symbol: ATOPT3                                                                                                                                                                                                                                                                                                                                                                                                                                                                                                        | 9.4 | 6.4  | 2.9  | 5.5  |
| 9324 AT1G11910.1   aspartyl protease family protein, contains Pfam profiles: PF00026 eukaryotic aspartyl protease, PF03489 surfactant protein B, PF05184 saposin-like type B, region 1   chr1:4016789-4020916 REVERSE   Aliases: F12F1.24, F12F1_24                                                                                                                                                                                                                                                                                      | 9.4 | 11.1 | -1.7 | -2.6 |
| 7138 ATCG00810.1   Symbol: RPL22   encodes a chloroplast ribosomal protein L22, a constituent of the large subunit of the ribosomal complex   chrC:83467-83949 REVERSE   Aliases: RPL22                                                                                                                                                                                                                                                                                                                                                  | 9.4 | 6.8  | 2.5  | 3.5  |
| 9997 AT4G10050.1   hydrolase, alpha/beta fold family protein, similar to protein phosphatase methylesterase-1 (Homo sapiens) GI:5533003; contains Pfam profile PF00561: hydrolase, alpha/beta fold family   chr4:6284447-6287287 REVERSE   Aliases: F28M11.4                                                                                                                                                                                                                                                                             | 9.4 | 8.6  | 0.8  | 2.4  |

|                                                                                                                                                                                                                                                                                                                                                                                                                                                           |     |      |      |      |
|-----------------------------------------------------------------------------------------------------------------------------------------------------------------------------------------------------------------------------------------------------------------------------------------------------------------------------------------------------------------------------------------------------------------------------------------------------------|-----|------|------|------|
| 7203 AT1G76790.1   O-methyltransferase family 2 protein, similar to caffeic acid O-methyltransferase (Catharanthus roseus)(GI:18025321), catechol O-methyltransferase GB:CAA55358 (Vanilla planifolia)   chr1:28827080-28828567 REVERSE   Aliases: F28O16.16, F28O16_16                                                                                                                                                                                   | 9.4 | 8.2  | 1.2  | 3.4  |
| 9934 AT4G17530.1   Symbol: RAB1C   Ras-related GTP-binding protein, putative, very strong similarity to RAB1C (Lotus corniculatus var. japonicus) GI:1370166; contains Pfam profile PF00071: Ras family   chr4:9773094-9775598 REVERSE   Aliases: DL4800C, FCAALL.87                                                                                                                                                                                      | 9.4 | 9.9  | -0.5 | -2.4 |
| 19443 AT4G25030.2   expressed protein   chr4:12864838-12866837 FORWARD   Aliases: F13M23.170, F13M23_170                                                                                                                                                                                                                                                                                                                                                  | 9.4 | 9.3  | 0.1  | 0.3  |
| 1077 AT5G60670.1   60S ribosomal protein L12 (RPL12C), 60S RIBOSOMAL PROTEIN L12 (like), Arabidopsis thaliana, PIR:T45883   chr5:24398136-24398819 REVERSE   Aliases: MUP24.13, MUP24_13                                                                                                                                                                                                                                                                  | 9.4 | 7.3  | 2.1  | 9.3  |
| 3159 AT2G02230.1   Symbol: ATPP2 B1   similar to F-box family protein / SKP1 interacting partner 3-related [Arabidopsis thaliana] (TAIR:At2g02240.1); similar to F-box family protein-like [Oryza sativa (japonica cultivar-group)] (GB:XP_468355.1); contains InterPro domain Cyclin-like F-box (InterPro:IPR001810)   chr2:590222-591649 REVERSE   Aliases: ATPP2 B1, T16F16.2, T16F16_2                                                                | 9.4 | 5.5  | 3.9  | 5.9  |
| 17016 AT3G14310.1   Symbol: ATPME3                                                                                                                                                                                                                                                                                                                                                                                                                        | 9.4 | 8.9  | 0.5  | 0.8  |
| 6090 AT1G16460.3   Symbol: ATRDH2                                                                                                                                                                                                                                                                                                                                                                                                                         | 9.4 | 7.6  | 1.7  | 4.0  |
| 2541 AT5G46160.2   ribosomal protein L14 family protein / huellenlos paralog (HLP), contains Pfam profile PF00238: Ribosomal protein L14p/L23e; identical to cDNA HUELLENLOS PARALOG (HLP) nuclear gene for mitochondrial product GU:18140859   chr5:18728582-18729734 REVERSE   Aliases: MCL19.22, MCL19_22                                                                                                                                              | 9.4 | 7.7  | 1.6  | 6.6  |
| 7459 AT4G15093.1   catalytic LigB subunit of aromatic ring-opening dioxygenase family, contains Pfam PF02900: Catalytic LigB subunit of aromatic ring-opening dioxygenase   chr4:8618370-8619643 FORWARD   Aliases: None                                                                                                                                                                                                                                  | 9.4 | 10.4 | -1.1 | -3.3 |
| 12715 AT1G48920.1   nucleolin, putative, similar to nuM1 protein GI:1279562 from (Medicago sativa)   chr1:18101776-18105291 FORWARD   Aliases: F27K7.6, F27K7_6                                                                                                                                                                                                                                                                                           | 9.4 | 8.9  | 0.5  | 1.7  |
| 18597 AT5G59420.1   oxysterol-binding family protein, similar to SP:P16258 Oxysterol-binding protein 1 {Oryctolagus cuniculus}; contains Pfam profile PF01237: Oxysterol-binding protein   chr5:23978806-23982050 FORWARD   Aliases: F2O15.17, F2O15_17                                                                                                                                                                                                   | 9.4 | 9.5  | -0.2 | -0.5 |
| 13648 AT2G14750.1   Symbol: APK   adenylylsulfate kinase 1 (AKN1), identical to adenylylsulfate kinase 1, chloroplast precursor (APS kinase, Adenosine-5'phosphosulfate kinase, ATP adenosine-5'- phosphosulfate 3'-phosphotransferase) (Arabidopsis thaliana) SWISS-PROT:Q43295   chr2:6321178-6322848 FORWARD   Aliases: ADENOSINE PHOSPHOSULFATE KINASE, APS KINASE, F26C24.11, F26C24_11                                                              | 9.4 | 9.7  | -0.3 | -1.4 |
| 2630 AT1G43710.1   Symbol: EMB1075   serine decarboxylase, identical to serine decarboxylase (Arabidopsis thaliana) GI:15011302; contains Pfam profile PF00282: Pyridoxal-dependent decarboxylase conserved domain                                                                                                                                                                                                                                        | 9.4 | 10.7 | -1.4 | -6.5 |
| 21115 AT4G18930.1   cyclic phosphodiesterase, identical to cyclic phosphodiesterase (Arabidopsis thaliana) gi:2065013:emb:CAA72363   chr4:10370715-10372056 FORWARD   Aliases: F13C5.100, F13C5_100                                                                                                                                                                                                                                                       | 9.4 | 9.4  | 0.0  | 0.0  |
| 375 AT3G29320.1   glucan phosphorylase, putative, similar to alpha-glucan phosphorylase, L isozyme 1 precursor GB:P04045 from (Solanum tuberosum) (J. Biochem. 106 (4), 691-695 (1989))   chr3:11254059-11259051 FORWARD   Aliases: MUO10.17                                                                                                                                                                                                              | 9.4 | 4.4  | 4.9  | 13.2 |
| 7268 ATCG00480.1   Symbol: ATPB   chloroplast-encoded gene for beta subunit of ATP synthase   chrC:52660-54156 REVERSE   Aliases: ATPB                                                                                                                                                                                                                                                                                                                    | 9.4 | 7.6  | 1.7  | 3.4  |
| 17088 AT1G48410.2   Symbol: AGO1   argonaute protein (AGO1), identical to SP:O04379 Argonaute protein (AGO1) {Arabidopsis thaliana}; contains Pfam profiles PF02171: Piwi domain, PF02170: PAZ domain   chr1:17889766-17896236 REVERSE   Aliases: ARGONAUTE 1, ARGONAUTE1, T1N15.2, T1N15_2                                                                                                                                                               | 9.4 | 9.7  | -0.3 | -0.8 |
| 5695 AT2G25950.1   expressed protein   chr2:11075729-11077738 FORWARD   Aliases: F17H15.2                                                                                                                                                                                                                                                                                                                                                                 | 9.4 | 7.3  | 2.0  | 4.2  |
| 4047 AT4G38220.2   aminoacylase, putative / N-acyl-L-amino-acid amidohydrolase, putative, similar to aminoacylase-1 (N-acyl-L-amino-acid amidohydrolase, ACY-1)(Homo sapiens) SWISS-PROT:Q03154   chr4:17925174-17927091 FORWARD   Aliases: F20D10.340, F20D10_340                                                                                                                                                                                        | 9.4 | 10.7 | -1.3 | -5.2 |
| 4304 AT5G23590.2   similar to DNAJ heat shock protein, mitochondrially targeted (GFA2) [Arabidopsis thaliana] (TAIR:At5g48030.1); similar to PREDICTED: similar to hypothetical protein FLJ10634 [Canis familiaris] (GB:XP_535435.1); contains InterPro domain Heat shock protein DnaJ (InterPro:IPR003095); contains InterPro domain Heat shock protein DnaJ, N-terminal (InterPro:IPR001623)   chr5:7953532-7955625 REVERSE   Aliases: MQM1.14, MQM1_14 | 9.4 | 7.7  | 1.6  | 5.0  |
| 4981 AT1G08970.4   Symbol: HAP5C   CCAAT-box binding transcription factor Hap5a, putative   chr1:2882546-2884285 FORWARD   Aliases: F7G19.16, F7G19_16, HAP5C, HEME ACTIVATED PROTEIN 5C                                                                                                                                                                                                                                                                  | 9.4 | 7.1  | 2.3  | 4.6  |

|                   |                                                                                                                                                                                                                                                                                                                                                                                                                                                                                                                        |     |      |      |      |
|-------------------|------------------------------------------------------------------------------------------------------------------------------------------------------------------------------------------------------------------------------------------------------------------------------------------------------------------------------------------------------------------------------------------------------------------------------------------------------------------------------------------------------------------------|-----|------|------|------|
| 669 AT1G65700.2   | similar to small nuclear ribonucleoprotein, putative / snRNP, putative / Sm protein, putative [Arabidopsis thaliana] (TAIR:At1g19120.1); similar to PREDICTED: similar to U6 snRNA-associated Sm-like protein LSm8 [Gallus gallus] (GB:XP_416009.1); contains InterPro domain Small nuclear ribonucleoprotein (Sm protein) (InterPro:IPR001163)   chr1:24437943-24439918 REVERSE   Aliases: F1E22.8, F1E22_8                                                                                                           | 9.4 | 6.2  | 3.2  | 10.9 |
| 10423 AT1G52420.1 | glycosyl transferase family 1 protein, contains Pfam profile: PF00534 Glycosyl transferases group 1   chr1:19531518-19534956 FORWARD   Aliases: F19K6.13                                                                                                                                                                                                                                                                                                                                                               | 9.4 | 9.0  | 0.4  | 2.2  |
| 7488 AT3G17020.1  | universal stress protein (USP) family protein, similar to early nodulin ENOD18 (Vicia faba) GI:11602747; contains Pfam profile PF00582: universal stress protein family   chr3:5802555-5804130 REVERSE   Aliases: K14A17.9                                                                                                                                                                                                                                                                                             | 9.4 | 11.5 | -2.1 | -3.3 |
| 4622 AT2G29960.1  | Symbol: CYP5   peptidyl-prolyl cis-trans isomerase / cyclophilin (CYP5) / rotamase, identical to cyclophilin (Arabidopsis thaliana) gi:2443755:gb:AAB71401   chr2:12776134-12777656 REVERSE   Aliases: ATCYP5, F23F1.12, F23F1_12                                                                                                                                                                                                                                                                                      | 9.4 | 8.1  | 1.3  | 4.8  |
| 11166 AT3G15730.1 | Symbol: PLDALPHA1   phospholipase D alpha 1 / PLD alpha 1 (PLDALPHA1) (PLD1) / choline phosphatase 1, identical to SP:Q38882 Phospholipase D alpha 1 (EC 3.1.4.4) (AtPLDalpha1) (PLD alpha 1) (Choline phosphatase 1) (Phosphatidylcholine-hydrolyzing phospholipase D 1) (PLDalpha) (Arabidopsis thaliana)   chr3:5330344-5333752 FORWARD   Aliases: MSJ11.13, PHOSPHOLIPASE D, PHOSPHOLIPASE D ALPHA 1, PLD                                                                                                          | 9.4 | 8.2  | 1.1  | 2.0  |
| 11448 AT1G19660.2 | similar to wound-responsive protein-related [Arabidopsis thaliana] (TAIR:At1g75380.2); similar to wound-responsive protein-related [Arabidopsis thaliana] (TAIR:At1g75380.1); similar to wound-responsive protein-related [Arabidopsis thaliana] (TAIR:At1g75380.3); similar to putative wound inductive gene [Oryza sativa (japonica cultivar-group)] (GB:XP_481914.1)   chr1:6799972-6802643 REVERSE   Aliases: F14P1.1, F14P1_1                                                                                     | 9.4 | 10.7 | -1.3 | -2.0 |
| 11449 AT1G75380.3 | wound-responsive protein-related, similar to wound inductive gene GI:8096273 from (Nicotiana tabacum)   chr1:28285050-28287694 REVERSE   Aliases: F1B16.9, F1B16_9                                                                                                                                                                                                                                                                                                                                                     | 9.4 | 10.7 | -1.3 | -2.0 |
| 6808 AT4G39660.1  | Symbol: AGT2   alanine--glyoxylate aminotransferase, putative / beta-alanine-pyruvate aminotransferase, putative / AGT, putative, similar to SP:Q64565 Alanine--glyoxylate aminotransferase 2, mitochondrial precursor (EC 2.6.1.44) (AGT 2) (Beta-alanine-pyruvate aminotransferase) {Rattus norvegicus}; contains Pfam profile PF00202: aminotransferase, class III   chr4:18406767-18409466 FORWARD   Aliases: ALANINE:GLYOXYLATE AMINOTRANSFERASE 2, T19P19.50, T19P19_50                                          | 9.4 | 8.1  | 1.3  | 3.6  |
| 1539 AT5G14320.1  | 30S ribosomal protein S13, chloroplast (CS13), ribosomal protein S13 precursor, chloroplast Arabidopsis thaliana, PIR:S59594; identical to cDNA ribosomal protein S13 GI:1515106                                                                                                                                                                                                                                                                                                                                       | 9.4 | 6.7  | 2.7  | 8.1  |
| 854 AT3G56680.1   | expressed protein   chr3:21002259-21004646 FORWARD   Aliases: T8M16.10                                                                                                                                                                                                                                                                                                                                                                                                                                                 | 9.4 | 6.7  | 2.6  | 10.1 |
| 3517 AT5G40780.2  | Symbol: LHT1   lysine and histidine specific transporter, putative, strong similarity to lysine and histidine specific transporter GI:2576361 from (Arabidopsis thaliana); contains Pfam profile PF01490: Transmembrane amino acid transporter protein   chr5:16340910-16344502 FORWARD   Aliases: K1B16.3, K1B16_3, LYSINE AND HISTIDINE SPECIFIC TRANSPORTER                                                                                                                                                         | 9.4 | 11.2 | -1.8 | -5.6 |
| 8092 AT5G51570.1  | band 7 family protein, similar to hypersensitive-induced response protein (Zea mays) GI:7716468; contains Pfam profile PF01145: SPFH domain / Band 7 family   chr5:20966652-20968723 FORWARD   Aliases: K17N15.12, K17N15_12                                                                                                                                                                                                                                                                                           | 9.3 | 7.4  | 2.0  | 3.1  |
| 9448 AT5G13000.1  | Symbol: ATGSL12   glycosyl transferase family 48 protein, contains Pfam profile: PF02364 1,3-beta-glucan synthase   chr5:4110298-4121430 REVERSE   Aliases: GLUCAN SYNTHASE LIKE 12, GSL12, T24H18.170, T24H18_170                                                                                                                                                                                                                                                                                                     | 9.3 | 9.7  | -0.3 | -2.5 |
| 14206 AT5G21090.1 | leucine-rich repeat protein, putative, similar to leucine rich repeat protein (LRP) GI:1619300 from (Lycopersicon esculentum); contains leucine rich-repeat (LRR) domains Pfam:PF00560, INTERPRO:IPR001611   chr5:7164614-7167257 FORWARD   Aliases: T10F18.120, T10F18_120                                                                                                                                                                                                                                            | 9.3 | 8.4  | 0.9  | 1.3  |
| 16409 AT4G01370.1 | Symbol: ATMPK4                                                                                                                                                                                                                                                                                                                                                                                                                                                                                                         | 9.3 | 9.0  | 0.3  | 0.9  |
| 18011 AT4G02860.1 | similar to phenazine biosynthesis PhzC/PhzF family protein [Arabidopsis thaliana] (TAIR:At1g03210.1); similar to phenazine biosynthesis family protein [Oryza sativa (japonica cultivar-group)] (GB:AAU89223.1); contains InterPro domain Phenazine biosynthesis PhzC/PhzF protein (InterPro:IPR003719)   chr4:1268713-1270525 REVERSE   Aliases: T5J8.18, T5J8_18                                                                                                                                                     | 9.3 | 9.1  | 0.3  | 0.6  |
| 661 AT1G01940.1   | peptidyl-prolyl cis-trans isomerase cyclophilin-type family protein, contains Pfam domain, PF00160: peptidyl-prolyl cis-trans isomerase, cyclophilin-type   chr1:323027-324917 FORWARD   Aliases: F22M8.7, F22M8_7                                                                                                                                                                                                                                                                                                     | 9.3 | 4.5  | 4.8  | 10.9 |
| 8100 AT3G04790.1  | ribose 5-phosphate isomerase-related, similar to ribose-5-phosphate isomerase GI:18654317 from (Spinacia oleracea)   chr3:1313324-1314369 FORWARD   Aliases: F7O18.28, F7O18_28                                                                                                                                                                                                                                                                                                                                        | 9.3 | 8.3  | 1.1  | 3.1  |
| 18866 AT5G59160.3 | Symbol: TOPP2   similar to serine/threonine protein phosphatase PP1 isozyme 5 (TOPP5) / phosphoprotein phosphatase 1 [Arabidopsis thaliana] (TAIR:At3g46820.1); similar to protein phosphatase type 1 [Nicotiana tabacum] (GB:CAB07804.1); contains InterPro domain Metallo-phosphoesterase (InterPro:IPR004843); contains InterPro domain Serine/threonine-specific protein phosphatase and bis(5-nucleosyl)-tetrakisphosphate (InterPro:IPR006186)   chr5:23896563-23898855 FORWARD   Aliases: MNC17.9, MNC17_9, PPO | 9.3 | 9.2  | 0.2  | 0.4  |



|                                                                                                                                                                                                                                                                                                                                                                                                                                                                                                                                                                                                                                                                                                                                                                                                                                                                                                 |     |      |      |      |
|-------------------------------------------------------------------------------------------------------------------------------------------------------------------------------------------------------------------------------------------------------------------------------------------------------------------------------------------------------------------------------------------------------------------------------------------------------------------------------------------------------------------------------------------------------------------------------------------------------------------------------------------------------------------------------------------------------------------------------------------------------------------------------------------------------------------------------------------------------------------------------------------------|-----|------|------|------|
| 2495 AT5G32450.1   RNA recognition motif (RRM)-containing protein, various predicted proteins, Arabidopsis thaliana and others   chr5:12096848-12098803 FORWARD   Aliases: F18O9.60, F18O9_60                                                                                                                                                                                                                                                                                                                                                                                                                                                                                                                                                                                                                                                                                                   | 9.3 | 8.5  | 0.9  | 6.7  |
| 6635 AT1G45332.1   mitochondrial elongation factor, putative, similar to mitochondrial elongation factor GI:3917 from (Saccharomyces cerevisiae)   chr1:17174795-17179261 REVERSE   Aliases: AT1G45261, F2G19.2, F2G19_2                                                                                                                                                                                                                                                                                                                                                                                                                                                                                                                                                                                                                                                                        | 9.3 | 6.8  | 2.6  | 3.7  |
| 6636 AT2G45030.1   mitochondrial elongation factor, putative, similar to SP:P25039 Elongation factor G 1, mitochondrial precursor (mEF-G-1) {Saccharomyces cerevisiae}; contains Pfam profiles PF00009: Elongation factor Tu GTP binding domain, PF03764: Elongation factor G domain IV, PF00679: Elongation factor G C-terminus   chr2:18579486-18584045 FORWARD   Aliases: T14P1.16                                                                                                                                                                                                                                                                                                                                                                                                                                                                                                           | 9.3 | 6.8  | 2.6  | 3.7  |
| 1173 AT5G13520.1   peptidase M1 family protein, similar to SP:P09960 Leukotriene A-4 hydrolase (EC 3.3.2.6) (LTA-4 hydrolase) {Homo sapiens}; contains Pfam profile PF01433: Peptidase family M1   chr5:4341543-4344674 REVERSE   Aliases: T6I14.50, T6I14_50                                                                                                                                                                                                                                                                                                                                                                                                                                                                                                                                                                                                                                   | 9.3 | 6.0  | 3.4  | 9.0  |
| 1548 AT3G45160.1   expressed protein   chr3:16544436-16545063 REVERSE   Aliases: T14D3.100                                                                                                                                                                                                                                                                                                                                                                                                                                                                                                                                                                                                                                                                                                                                                                                                      | 9.3 | 5.5  | 3.8  | 8.1  |
| 4281 AT5G63890.2   Symbol: ATHDH   histidinol dehydrogenase, putative / HDH, putative, strong similarity to SP:P24226 Histidinol dehydrogenase, chloroplast precursor (EC 1.1.1.23) (HDH) {Brassica oleracea var.capitata}; contains Pfam profile PF00815: histidinol dehydrogenase   chr5:25582657-25585421 REVERSE   Aliases: HISTIDINOL DEHYDROGENASE, MGI19.9, MGI19_9                                                                                                                                                                                                                                                                                                                                                                                                                                                                                                                      | 9.3 | 7.3  | 2.0  | 5.0  |
| 13325 AT5G54680.1   basic helix-loop-helix (bHLH) family protein, similar to unknown protein (pir :B71406)   chr5:22234286-22236830 FORWARD   Aliases: K5F14.2, K5F14_2                                                                                                                                                                                                                                                                                                                                                                                                                                                                                                                                                                                                                                                                                                                         | 9.3 | 9.6  | -0.3 | -1.5 |
| 2942 AT2G19800.1   Symbol: MIOX2   expressed protein, similar to myo-inositol oxygenase (Sus scrofa) gi:17432544:gb:AAL39076   chr2:8537986-8540533 REVERSE   Aliases: F6F22.17, F6F22_17, MYO INOSITOL OXYGENASE 2                                                                                                                                                                                                                                                                                                                                                                                                                                                                                                                                                                                                                                                                             | 9.3 | 6.4  | 2.9  | 6.2  |
| 10049 AT1G12840.1   Symbol: DET3   vacuolar ATP synthase subunit C (VATC) / V-ATPase C subunit / vacuolar proton pump C subunit (DET3), identical to vacuolar ATP synthase subunit C SP:Q9SDS7 from (Arabidopsis thaliana)   chr1:4375517-4378509 FORWARD   Aliases: DE ETIOLATED 3, F13K23.9, F13K23_9, VACUOLAR ATP SYNTHASE SUBUNIT C                                                                                                                                                                                                                                                                                                                                                                                                                                                                                                                                                        | 9.3 | 8.6  | 0.8  | 2.3  |
| 1861 AT5G03740.1   Symbol: HD2C   zinc finger (C2H2 type) family protein, contains Pfam domain, PF00096: Zinc finger, C2H2 type   chr5:981896-984201 FORWARD   Aliases: F17C15.160, F17C15_160, HISTONE DEACETYLASE 2C                                                                                                                                                                                                                                                                                                                                                                                                                                                                                                                                                                                                                                                                          | 9.3 | 7.8  | 1.5  | 7.6  |
| 17729 AT2G29020.1   Rab5-interacting family protein, similar to Protein C20orf24 (Rab5-interacting protein) (RIP5) (PNAS-11) (Swiss-Prot:Q9BUV8) (Homo sapiens); contains transmembrane domains   chr2:12476806-12478742 FORWARD   Aliases: T9I4.10, T9I4_10                                                                                                                                                                                                                                                                                                                                                                                                                                                                                                                                                                                                                                    | 9.3 | 9.4  | -0.1 | -0.6 |
| 5512 AT1G48450.2   similar to expressed protein [Arabidopsis thaliana] (TAIR:At3g17800.1); similar to unknown [Brassica napus] (GB:AAK30572.1); contains InterPro domain Protein of unknown function DUF760 (InterPro:IPR008479)   chr1:17912171-17914113 REVERSE   Aliases: T1N15.6, T1N15_6                                                                                                                                                                                                                                                                                                                                                                                                                                                                                                                                                                                                   | 9.3 | 8.3  | 1.0  | 4.3  |
| 2261 AT2G20890.1   Symbol: THF1   Chloroplast-localized Thylakoid formation1 gene product involved in vesicle-mediated formation of thylakoid membranes. Thf1 antisense lines contain abnormal chloroplasts early in leaf development (chloroplasts have loosely stacked thylakoid membranes). Expression was induced in the light and decreased under dark conditions.   chr2:8994749-8996494 FORWARD   Aliases: F5H14.14, F5H14_14, THF1, THYLAKOID FORMATION1                                                                                                                                                                                                                                                                                                                                                                                                                                | 9.3 | 7.2  | 2.1  | 7.0  |
| 11535 AT2G05830.3   similar to eukaryotic translation initiation factor 2B family protein / eIF-2B family protein [Arabidopsis thaliana] (TAIR:At3g07300.1); similar to IDI2 [Hordeum vulgare subsp. vulgare] (GB:BA21393.1); contains InterPro domain Initiation factor 2B (InterPro:IPR000649)   chr2:2229704-2232103 FORWARD   Aliases: T6P5.3, T6P5_3                                                                                                                                                                                                                                                                                                                                                                                                                                                                                                                                       | 9.3 | 8.4  | 0.9  | 1.9  |
| 818 AT3G27080.1   Symbol: TOM20 3   mitochondrial import receptor subunit TOM20-3 / translocase of outer membrane 20 kDa subunit 3 (TOM20-3), identical to mitochondrial import receptor subunit TOM20-3 SP:P82874 from (Arabidopsis thaliana)   chr3:9986319-9987866 REVERSE   Aliases: MOJ10.22, TRANSLOCASE OUTER MEMBRANE 20 3                                                                                                                                                                                                                                                                                                                                                                                                                                                                                                                                                              | 9.3 | 6.6  | 2.7  | 10.2 |
| 2863 AT2G29530.1   Symbol: TIM10   mitochondrial import inner membrane translocase (TIM10), identical to mitochondrial import inner membrane translocase subunit Tim10 (Arabidopsis thaliana) Swiss-Prot:Q9ZW33; contains Pfam domain, PF02953: Tim10/DDP family zinc finger   chr2:12647901-12649367 REVERSE   Aliases: F16P2.9, F16P2_9, TIM10                                                                                                                                                                                                                                                                                                                                                                                                                                                                                                                                                | 9.3 | 6.0  | 3.3  | 6.3  |
| 20040 AT4G36515.1   expressed protein   chr4:17229557-17230299 REVERSE   Aliases: None                                                                                                                                                                                                                                                                                                                                                                                                                                                                                                                                                                                                                                                                                                                                                                                                          | 9.3 | 9.2  | 0.1  | 0.2  |
| 4624 AT4G13940.3   Symbol: HOG1   similar to adenosylhomocysteinase, putative / S-adenosyl-L-homocysteine hydrolase, putative / AdoHcyase, putative [Arabidopsis thaliana] (TAIR:At3g23810.1); similar to adenosylhomocysteinase (EC 3.3.1.1) - wheat (GB:T06764); similar to S-adenosyl-L-homocystein hydrolase [Nicotiana sylvestris] (GB:BAA03709.1); similar to adenosylhomocysteinase [Medicago truncatula] (GB:AAO89238.1); similar to S-adenosyl-L-homocysteinase [Lupinus luteus] (GB:AAD56048.1); similar to wheat adenosylhomocysteinase-like protein [Oryza sativa (japonica cultivar-group)] (GB:AAO72664.1); contains InterPro domain S-adenosyl-L-homocysteine hydrolase (InterPro:IPR000043)   chr4:8054856-8057176 FORWARD   Aliases: DL3010W, EMB1395, EMBRYO DEFECTIVE 1395, FCAALL.35, HOMOLOGY DEPENDENT GENE SILENCING 1, S ADENOSYL L HOMOCYSTEINE HYDROLASE, SAHH, SAHH1 | 9.3 | 11.8 | -2.4 | -4.8 |

|                                                                                                                                                                                                                                                                                                                                                                                                                                                                                                           |     |      |      |      |
|-----------------------------------------------------------------------------------------------------------------------------------------------------------------------------------------------------------------------------------------------------------------------------------------------------------------------------------------------------------------------------------------------------------------------------------------------------------------------------------------------------------|-----|------|------|------|
| 3878 AT3G10670.1   Symbol: ATNAP7                                                                                                                                                                                                                                                                                                                                                                                                                                                                         | 9.3 | 6.6  | 2.8  | 5.4  |
| 336 AT3G55170.2   60S ribosomal protein L35 (RPL35C), various ribosomal L35 proteins   chr3:20463946-20465316 REVERSE   Aliases: T26I12.50                                                                                                                                                                                                                                                                                                                                                                | 9.3 | 6.1  | 3.2  | 13.8 |
| 4644 AT1G45130.1   beta-galactosidase, putative / lactase, putative, similar to beta-galactosidase ( <i>Lycopersicon esculentum</i> ) GI:7939619, beta-galactosidase BG1 GI:15081596 from ( <i>Vitis vinifera</i> ); contains Pfam profile PF01301: Glycosyl hydrolases family 35   chr1:17067692-17071702 FORWARD   Aliases: F27F5.20, F27F5_20                                                                                                                                                          | 9.3 | 10.5 | -1.2 | -4.8 |
| 1412 AT3G07770.1   heat shock protein-related, strong similarity to heat-shock protein ( <i>Secale cereale</i> ) GI:556673; contains Pfam profiles PF02518: ATPase, histidine kinase-, DNA gyrase B-, and HSP90-like domain protein, PF00183: Hsp90 protein   chr3:2479561-2484171 FORWARD   Aliases: MLP3.22                                                                                                                                                                                             | 9.3 | 5.2  | 4.1  | 8.4  |
| 3210 AT3G24315.1   sec20 family protein, contains Pfam PF03908: Sec20   chr3:8820464-8822810 REVERSE   Aliases: None                                                                                                                                                                                                                                                                                                                                                                                      | 9.3 | 7.9  | 1.4  | 5.9  |
| 19848 AT2G06530.1   SNF7 family protein, contains Pfam domain, PF03357: SNF7 family   chr2:2588542-2590442 REVERSE   Aliases: T12H3.8, T12H3_8                                                                                                                                                                                                                                                                                                                                                            | 9.3 | 9.3  | 0.1  | 0.2  |
| 1773 AT2G14890.2   Symbol: AGP9   arabinogalactan-protein (AGP9), identical to gi:10880495:gb:AAG24277   chr2:6406703-6408064 FORWARD   Aliases: ARABINOGALACTAN PROTEIN 9, T26I20.5, T26I20_5                                                                                                                                                                                                                                                                                                            | 9.3 | 7.0  | 2.3  | 7.7  |
| 7842 AT3G63520.1   Symbol: CCD1   9-cis-epoxycarotenoid dioxygenase / neoxanthin cleavage enzyme / NCED1 / carotenoid cleavage dioxygenase 1 (CCD1), identical to putative 9-cis-epoxy-carotenoid dioxygenase (GI:3096910); contains Pfam profile PF03055: Retinal pigment epithelial membrane protein   chr3:23463915-23466871 FORWARD   Aliases: ATCCD1, ATNCED1, CAROTENOID CLEAVAGE DIOXYGENASE 1, MAA21.150                                                                                          | 9.3 | 10.1 | -0.7 | -3.2 |
| 10650 AT5G14040.1   mitochondrial phosphate transporter, identical to mitochondrial phosphate transporter GI:3318617 from ( <i>Arabidopsis thaliana</i> )   chr5:4530645-4533072 REVERSE   Aliases: MUA22.4, MUA22_4                                                                                                                                                                                                                                                                                      | 9.3 | 7.9  | 1.5  | 2.2  |
| 1767 AT3G22240.1   expressed protein   chr3:7863684-7864586 REVERSE   Aliases: MMP21.2                                                                                                                                                                                                                                                                                                                                                                                                                    | 9.3 | 11.8 | -2.5 | -7.8 |
| 17614 AT4G29010.1   Symbol: AIM1   abnormal inflorescence meristem 1 / fatty acid multifunctional protein (AIM1), identical to gi:4337025; contains Pfam profiles PF02737 (3-hydroxyacyl-CoA dehydrogenase, NAD binding domain), PF00378 (enoyl-CoA hydratase/isomerase family protein), PF00725 (3-hydroxyacyl-CoA dehydrogenase)   chr4:14296679-14302066 REVERSE   Aliases: ABNORMAL INFLORESCENCE MERISTEM, F19B15.40, F19B15_40                                                                      | 9.3 | 9.1  | 0.3  | 0.7  |
| 1209 AT2G44670.1   senescence-associated protein-related, similar to senescence-associated protein SAG102 (GI:22331931) ( <i>Arabidopsis thaliana</i> );   chr2:18432255-18433135 FORWARD   Aliases: F16B22.16                                                                                                                                                                                                                                                                                            | 9.3 | 5.7  | 3.7  | 9.0  |
| 18310 AT5G40760.1   Symbol: G6PD6   Encodes a cytosolic glucose-6-phosphate dehydrogenase that is insensitive to reduction by DTT and whose mRNA is expressed ubiquitously.                                                                                                                                                                                                                                                                                                                               | 9.3 | 9.1  | 0.3  | 0.5  |
| 11955 AT5G20900.1   expressed protein   chr5:7090751-7092541 FORWARD   Aliases: F22D1.70, F22D1_70                                                                                                                                                                                                                                                                                                                                                                                                        | 9.3 | 8.5  | 0.9  | 1.8  |
| 7007 AT3G20050.1   Symbol: ATTCP 1   T-complex protein 1 alpha subunit / TCP-1-alpha / chaperonin (CCT1), identical to SWISS-PROT:P28769- T-complex protein 1, alpha subunit (TCP-1-alpha) ( <i>Arabidopsis thaliana</i> )   chr3:6998260-7002407 REVERSE   Aliases: MAL21.5, MAL21_5                                                                                                                                                                                                                     | 9.3 | 7.5  | 1.9  | 3.5  |
| 15793 AT3G60600.3   Symbol: VAP27 1   similar to vesicle-associated membrane protein, putative / VAMP, putative [ <i>Arabidopsis thaliana</i> ] (TAIR:At2g45140.1); similar to putative vesicle-associated membrane protein-associated protein [ <i>Oryza sativa</i> ( <i>japonica</i> cultivar-group)] (GB:XP_480176.1); contains InterPro domain Major sperm protein (MSP) domain (InterPro:IPR000535)   chr3:22411370-22413678 FORWARD   Aliases: T4C21.10, VAMP/SYNAPTOBREVIN ASSOCIATED PROTEIN 27 1 | 9.3 | 9.6  | -0.3 | -1.0 |
| 5518 AT4G26410.1   expressed protein   chr4:13346757-13349025 FORWARD   Aliases: M3E9.160, M3E9_160                                                                                                                                                                                                                                                                                                                                                                                                       | 9.3 | 8.1  | 1.2  | 4.3  |
| 19496 AT2G30870.1   Symbol: ATGSTF10   glutathione S-transferase, putative, supported by cDNA GI:443698 GB:D17673   chr2:13148527-13150296 FORWARD   Aliases: ATGSTF4, EARLY DEHYDRATION INDUCED 13, ERD13, F7F1.8, F7F1_8, GLUTATHIONE S TRANSFERASE                                                                                                                                                                                                                                                     | 9.3 | 9.6  | -0.3 | -0.3 |
| 19836 AT3G47000.1   glycosyl hydrolase family 3 protein, beta-D-glucan exohydrolase, <i>Nicotiana tabacum</i> , TREMBL:AB017502_1   chr3:17324631-17327547 REVERSE   Aliases: F13I12.50                                                                                                                                                                                                                                                                                                                   | 9.3 | 9.2  | 0.1  | 0.2  |
| 19182 AT5G39510.1   Symbol: VTI11   vesicle transport v-SNARE 11 (VTI11) / vesicle soluble NSF attachment protein receptor VTI1a (VTI1A), identical to SP:Q9SEL6 Vesicle transport v-SNARE 11 (AtVTI11) (Vesicle transport v-SNARE protein VTI1a) (Vesicle soluble NSF attachment protein receptor VTI1a) (AtVTI1a) { <i>Arabidopsis thaliana</i> }   chr5:15838671-15840992 FORWARD   Aliases: ATVTI11, ATVTI1A, MUL8.190, MUL8_190, SGR4, VTI1A, ZIG                                                    | 9.3 | 9.2  | 0.1  | 0.4  |
| 2665 AT5G13710.1   Symbol: SMT1   sterol 24-C-methyltransferase, putative, similar to SP:P25087 Sterol 24-C-methyltransferase, Delta(24)-sterol C- methyltransferase, <i>Saccharomyces cerevisiae</i>   chr5:4423698-4427050 REVERSE   Aliases: CEPHALOPOD, CPH, MSH12.18, MSH12_18, SAM:CYCLOARTENOL C24 METHYLTRANSFERASE, STEROL METHYLTRANSFERASE 1                                                                                                                                                   | 9.3 | 7.2  | 2.1  | 6.5  |

|                                                                                                                                                                                                                                                                                                                                                                                                                                                                                                                                                                                                                       |     |      |      |      |
|-----------------------------------------------------------------------------------------------------------------------------------------------------------------------------------------------------------------------------------------------------------------------------------------------------------------------------------------------------------------------------------------------------------------------------------------------------------------------------------------------------------------------------------------------------------------------------------------------------------------------|-----|------|------|------|
| 304 AT2G43710.2   Symbol: SSI2   acyl-(acyl-carrier-protein) desaturase / stearoyl-ACP desaturase (SSI2), identical to gi:15149310; contains Pfam profile PF03405: Fatty acid desaturase; identical to cDNA stearoyl ACP desaturase (SSI2), SSI2-FAB2 allele, GI:15149309   chr2:18127039-18129966 FORWARD   Aliases: F18O19.18, FAB2                                                                                                                                                                                                                                                                                 | 9.3 | 5.2  | 4.1  | 14.2 |
| 11230 AT5G17920.1   Symbol: ATCIMS                                                                                                                                                                                                                                                                                                                                                                                                                                                                                                                                                                                    | 9.3 | 6.1  | 3.2  | 2.0  |
| 11229 AT3G03780.2   5-methyltetrahydropteroyltriglutamate--homocysteine methyltransferase, putative / vitamin-B12-independent methionine synthase, putative / cobalamin-independent methionine synthase, putative, very strong similarity to SP:O50008 5-methyltetrahydropteroyltriglutamate--homocysteine methyltransferase (EC 2.1.1.14) (Vitamin-B12-independent methionine synthase isozyme) (Cobalamin-independent methionine synthase isozyme) {Arabidopsis thaliana}; contains Pfam profile PF01717: Methionine synthase, vitamin-B12 independent   chr3:957095-960985 FORWARD   Aliases: F20H23.19, F20H23_19 | 9.3 | 6.1  | 3.2  | 2.0  |
| 4927 AT2G16800.1   high-affinity nickel-transport family protein, contains Pfam domain, PF03824: High-affinity nickel-transport protein   chr2:7292820-7294447 FORWARD   Aliases: T24I21.21, T24I21_21                                                                                                                                                                                                                                                                                                                                                                                                                | 9.3 | 8.4  | 0.9  | 4.6  |
| 1096 AT2G19940.2   semialdehyde dehydrogenase family protein, similar to N-acetyl-glutamyl-phosphate reductase (Campylobacter jejuni) GI:6650362; contains Pfam profiles PF02774: Semialdehyde dehydrogenase dimerisation domain, PF01118: Semialdehyde dehydrogenase NAD binding domain   chr2:8620116-8623099 FORWARD   Aliases: F6F22.3, F6F22_3                                                                                                                                                                                                                                                                   | 9.3 | 4.7  | 4.6  | 9.3  |
| 9848 AT5G50920.1   Symbol: CLPC   Similar to ATP-dependent Clp protease ATP-binding subunit / ClpC, almost identical to ClpC GI:2921158 from (Arabidopsis thaliana); contains Pfam profile PF02861: Clp amino terminal domain; contains Pfam profile PF00004: ATPase, AAA family; contains Pfam profile PF02151: UvrB/uvrC motif. Involved in protein import into the chloroplast. May provide ATP source that drives the TIC translocation machinery,   chr5:20732698-20737597 REVERSE   Aliases: ATHSP93 V, CLPC, HSP93 V, K3K7.7, K3K7_7                                                                           | 9.3 | 8.8  | 0.5  | 2.4  |
| 3991 AT5G13120.1   peptidyl-prolyl cis-trans isomerase cyclophilin-type family protein, contains Pfam domain, PF00160: peptidyl-prolyl cis-trans isomerase, cyclophilin-type   chr5:4162506-4164787 REVERSE   Aliases: T19L5.80, T19L5_80                                                                                                                                                                                                                                                                                                                                                                             | 9.3 | 8.1  | 1.2  | 5.3  |
| 5705 AT1G19920.1   Symbol: APS2   sulfate adenylyltransferase 2 / ATP-sulfurylase 2 (ASA1) (MET3-1) (APS2), identical to ATP sulfurylase (APS2) (Arabidopsis thaliana) GI:1575324   chr1:6914604-6916745 REVERSE   Aliases: ASA1, ATP SULFURYLASE PRECURSOR, F6F9.2, F6F9_2                                                                                                                                                                                                                                                                                                                                           | 9.3 | 6.8  | 2.5  | 4.2  |
| 7605 AT1G53400.1   expressed protein   chr1:19928439-19930268 FORWARD   Aliases: F12M16.29, F12M16_29                                                                                                                                                                                                                                                                                                                                                                                                                                                                                                                 | 9.3 | 10.0 | -0.7 | -3.3 |
| 8083 AT3G09840.1   Symbol: CDC48   cell division cycle protein 48 (CDC48A) (CDC48), identical to SP:P54609 Cell division cycle protein 48 homolog {Arabidopsis thaliana}   chr3:3019345-3023050 FORWARD   Aliases: ATCDC48, CDC48A, CELL DIVISION CYCLE 48, F8A24.11                                                                                                                                                                                                                                                                                                                                                  | 9.3 | 10.6 | -1.3 | -3.1 |
| 7022 AT3G18280.1   protease inhibitor/seed storage/lipid transfer protein (LTP) family protein, similar to TED4 (Zinnia elegans) GI:493721; contains Pfam protease inhibitor/seed storage/LTP family domain PF00234                                                                                                                                                                                                                                                                                                                                                                                                   | 9.3 | 10.6 | -1.3 | -3.5 |
| 14773 AT3G63310.1   expressed protein, low similarity to N-methyl-D-aspartate receptor-associated protein (Drosophila melanogaster) GI:567104; contains Pfam profile PF01027: Uncharacterized protein family UPF0005                                                                                                                                                                                                                                                                                                                                                                                                  | 9.3 | 8.7  | 0.5  | 1.2  |
| 2018 AT3G03980.1   short-chain dehydrogenase/reductase (SDR) family protein, similar to short-chain type dehydrogenase/reductase SP:Q08632 (Picea abies)   chr3:1031749-1033214 FORWARD   Aliases: T11I18.9, T11I18_9                                                                                                                                                                                                                                                                                                                                                                                                 | 9.3 | 5.6  | 3.6  | 7.4  |
| 8730 AT1G63800.1   ubiquitin-conjugating enzyme 5 (UBC5), E2; identical to gi:431269, SP:P42749   chr1:23671279-23672743 REVERSE   Aliases: T12P18.18, T12P18_18                                                                                                                                                                                                                                                                                                                                                                                                                                                      | 9.3 | 10.3 | -1.0 | -2.8 |
| 1570 AT1G09830.1   phosphoribosylamine--glycine ligase (PUR2), identical to phosphoribosylamine--glycine ligase, chloroplast (precursor) SP:P52420 from (Arabidopsis thaliana)   chr1:3192683-3195008 REVERSE   Aliases: F21M12.22, F21M12_22                                                                                                                                                                                                                                                                                                                                                                         | 9.3 | 6.3  | 2.9  | 8.1  |
| 10489 AT4G36020.1   cold-shock DNA-binding family protein, contains Pfam domains, PF00313: 'Cold-shock' DNA-binding domain and PF00098: Zinc knuckle                                                                                                                                                                                                                                                                                                                                                                                                                                                                  | 9.3 | 8.7  | 0.6  | 2.2  |
| 11351 AT4G10610.2   Symbol: RBP37   similar to RNA-binding protein, putative [Arabidopsis thaliana] (TAIR:At1g32790.1); similar to putative RNA-binding protein RBP37 [Oryza sativa (japonica cultivar-group)] (GB:XP_479783.1); contains InterPro domain RNA-binding region RNP-1 (RNA recognition motif) (InterPro:IPR000504)   chr4:6557173-6559591 FORWARD   Aliases: ATRBP37, CID12, RNA BINDING PROTEIN 37, T4F9.70, T4F9_70                                                                                                                                                                                    | 9.3 | 8.5  | 0.8  | 2.0  |
| 3119 AT2G45200.1   Symbol: GOS12   Golgi SNARE 12 protein / Golgi SNAP receptor complex member 1, identical to Probable 28 kDa Golgi SNARE protein (Golgi SNAP receptor complex member 1) (SP:O22151) {Arabidopsis thaliana}   chr2:18644582-18646858 REVERSE   Aliases: ATGOS12, F4L23.29, GOLGI SNARE 12                                                                                                                                                                                                                                                                                                            | 9.3 | 7.5  | 1.8  | 6.0  |
| 417 AT3G50550.2   expressed protein, isoform contains a non-consensus AT donor site at intron 1   chr3:18770444-18771420 FORWARD   Aliases: T20E23.150                                                                                                                                                                                                                                                                                                                                                                                                                                                                | 9.3 | 5.6  | 3.7  | 12.7 |
| 7031 AT5G65270.1   Ras-related GTP-binding family protein, similar to GTP-binding protein RAB11A GI:1370142 from (Lotus japonicus); contains Pfam profile: PF00071 Ras family   chr5:26100602-26101940 FORWARD   Aliases: MQN23.22, MQN23_22                                                                                                                                                                                                                                                                                                                                                                          | 9.3 | 7.3  | 2.0  | 3.5  |



|                                                                                                                                                                                                                                                                                                                                                                                                                                                                                                                                                                                                                                                                                                                                                                                                                                                                                                                                                                        |     |      |      |      |
|------------------------------------------------------------------------------------------------------------------------------------------------------------------------------------------------------------------------------------------------------------------------------------------------------------------------------------------------------------------------------------------------------------------------------------------------------------------------------------------------------------------------------------------------------------------------------------------------------------------------------------------------------------------------------------------------------------------------------------------------------------------------------------------------------------------------------------------------------------------------------------------------------------------------------------------------------------------------|-----|------|------|------|
| 1604 AT5G20160.2   ribosomal protein L7Ae/L30e/S12e/Gadd45 family protein, Similar to NHP2/L7Ae family proteins, see SWISSPROT:P32495 and PMID:2063628.   chr5:6803838-6805197 REVERSE   Aliases: F5O24.50, F5O24_50                                                                                                                                                                                                                                                                                                                                                                                                                                                                                                                                                                                                                                                                                                                                                   | 9.3 | 5.8  | 3.4  | 8.0  |
| 4824 AT4G26840.1   Symbol: SUM1   ubiquitin-like protein (SMT3), identical to Ubiquitin-like protein SMT3 SP:P55852 from(Arabidopsis thaliana); identical to cDNA SMT3 protein GI:1707371   chr4:13497334-13498733 FORWARD   Aliases: F10M23.180, F10M23_180, SMALL UBIQUITIN LIKE MODIFIER 1, SUMO 1, SUMO1                                                                                                                                                                                                                                                                                                                                                                                                                                                                                                                                                                                                                                                           | 9.3 | 7.9  | 1.3  | 4.7  |
| 6963 AT3G27430.2   Symbol: PBB1   20S proteasome beta subunit B (PBB1), identical to 20S proteasome beta subunit PBB1 (PBB1) GB:AAC32066 (Arabidopsis thaliana) (Genetics 149 (2), 677-692 (1998)); contains Pfam profile: PF00227 proteasome A-type and B-type;   chr3:10153754-10156579 FORWARD   Aliases: 20S PROTEASOME BETA SUBUNIT PBB1, K1G2.26                                                                                                                                                                                                                                                                                                                                                                                                                                                                                                                                                                                                                 | 9.3 | 6.4  | 2.8  | 3.5  |
| 13814 AT1G60420.1   DC1 domain-containing protein, contains Pfam domain PF03107: DC1 domain   chr1:22265573-22268324 FORWARD   Aliases: T13D8.29, T13D8_29                                                                                                                                                                                                                                                                                                                                                                                                                                                                                                                                                                                                                                                                                                                                                                                                             | 9.3 | 9.8  | -0.5 | -1.4 |
| 1275 AT2G17280.1   phosphoglycerate/bisphosphoglycerate mutase family protein, contains Pfam profile PF00300: phosphoglycerate mutase family   chr2:7520293-7522122 FORWARD   Aliases: F5J6.4, F5J6_4                                                                                                                                                                                                                                                                                                                                                                                                                                                                                                                                                                                                                                                                                                                                                                  | 9.3 | 4.1  | 5.1  | 8.8  |
| 7218 AT2G17360.1   40S ribosomal protein S4 (RPS4A), contains ribosomal protein S4 signature from residues 8 to 22   chr2:7553567-7555395 FORWARD   Aliases: F5J6.12, F5J6_12                                                                                                                                                                                                                                                                                                                                                                                                                                                                                                                                                                                                                                                                                                                                                                                          | 9.3 | 7.6  | 1.7  | 3.4  |
| 10217 AT1G76140.1   similar to prolyl oligopeptidase, putative / prolyl endopeptidase, putative / post-proline cleaving enzyme, putative [Arabidopsis thaliana] (TAIR:At1g20380.1); similar to putative prolyl endopeptidase [Oryza sativa (japonica cultivar-group)] (GB:NP_908392.1); similar to OTTHUMP00000040498 [Homo sapiens] (GB:CAH72545.1); similar to OSJNBa0084K11.14 [Oryza sativa (japonica cultivar-group)] (GB:XP_473492.1); similar to similar to Prolyl endopeptidase (Post-proline cleaving enzyme) (PE) [Gallus gallus] (GB:NP_001006410.1); similar to prolyl endopeptidase [Mus musculus] (GB:NP_035286.1); contains InterPro domain Prolyl oligopeptidase serine protease (S9A) (InterPro:IPR002470); contains InterPro domain Prolyl oligopeptidase (InterPro:IPR001375); contains InterPro domain Prolyl oligopeptidase, N-terminal beta-propeller domain (InterPro:IPR004106)   chr1:28576024-28579930 FORWARD   Aliases: T23E18.8, T23E18_8 | 9.3 | 10.0 | -0.7 | -2.3 |
| 4369 AT3G56510.2   similar to unnamed protein product [Yarrowia lipolytica CLIB99] (GB:CAG82708.1)   chr3:20954907-20957640 REVERSE   Aliases: T5P19.160                                                                                                                                                                                                                                                                                                                                                                                                                                                                                                                                                                                                                                                                                                                                                                                                               | 9.3 | 8.2  | 1.1  | 5.0  |
| 2787 AT3G16780.1   60S ribosomal protein L19 (RPL19B), similar to ribosomal protein L19 GB:CAA45090 from (Homo sapiens)   chr3:5708931-5710415 FORWARD   Aliases: MGL6.7                                                                                                                                                                                                                                                                                                                                                                                                                                                                                                                                                                                                                                                                                                                                                                                               | 9.3 | 7.3  | 1.9  | 6.4  |
| 6816 AT4G27450.1   expressed protein, similar to auxin down-regulated protein ARG10 (Vigna radiata) GI:2970051, wali7 (aluminum-induced protein) (Triticum aestivum) GI:451193   chr4:13727493-13728892 REVERSE   Aliases: F27G19.50, F27G19_50                                                                                                                                                                                                                                                                                                                                                                                                                                                                                                                                                                                                                                                                                                                        | 9.3 | 8.2  | 1.1  | 3.6  |
| 20332 AT4G13670.1   peptidoglycan-binding domain-containing protein, similar to spore cortex-lytic enzyme prepeptide (GI:1644192) (Bacillus cereus); contains Pfam PF01471: Putative peptidoglycan binding domain; contains Pfam PF00684 : DnaJ central domain (4 repeats)   chr4:7948575-7950881 FORWARD   Aliases: F18A5.60, F18A5_60                                                                                                                                                                                                                                                                                                                                                                                                                                                                                                                                                                                                                                | 9.3 | 9.3  | -0.1 | -0.1 |
| 15353 AT3G24080.1   KRR1 family protein, contains Pfam PF05178: Krr1 family   chr3:8694969-8697131 REVERSE   Aliases: F14O13.28                                                                                                                                                                                                                                                                                                                                                                                                                                                                                                                                                                                                                                                                                                                                                                                                                                        | 9.3 | 8.8  | 0.5  | 1.1  |
| 4319 AT5G10695.1   expressed protein   chr5:3377664-3378222 FORWARD   Aliases: None                                                                                                                                                                                                                                                                                                                                                                                                                                                                                                                                                                                                                                                                                                                                                                                                                                                                                    | 9.3 | 8.0  | 1.3  | 5.0  |
| 3509 AT1G01070.2   nodulin MtN21 family protein, similar to MtN21 GI:2598575 (root nodule development) from (Medicago truncatula)   chr1:38753-40927 REVERSE   Aliases: T25K16.7, T25K16_7                                                                                                                                                                                                                                                                                                                                                                                                                                                                                                                                                                                                                                                                                                                                                                             | 9.3 | 7.0  | 2.2  | 5.6  |
| 1310 AT3G07410.1   Ras-related GTP-binding family protein, contains Pfam profile: PF00071 Ras family   chr3:2372323-2373562 REVERSE   Aliases: F21O3.12                                                                                                                                                                                                                                                                                                                                                                                                                                                                                                                                                                                                                                                                                                                                                                                                                | 9.3 | 5.2  | 4.1  | 8.7  |
| 7432 AT2G32240.1   expressed protein, contains Pfam profile: PF04508 viral A-type inclusion protein repeat   chr2:13691376-13695401 REVERSE   Aliases: F22D22.1, F22D22_1                                                                                                                                                                                                                                                                                                                                                                                                                                                                                                                                                                                                                                                                                                                                                                                              | 9.3 | 10.3 | -1.1 | -3.4 |
| 1850 AT1G66530.1   arginyl-tRNA synthetase, putative / arginine--tRNA ligase, putative, similar to SP:P37880 Arginyl-tRNA synthetase (EC 6.1.1.19) (Arginine--tRNA ligase) (ArgRS) {Cricetulus longicaudatus}; contains Pfam profiles PF00750: arginyl-tRNA synthetase, PF03485: arginyl-tRNA synthetase N-terminal domain   chr1:24822574-24826005 REVERSE   Aliases: F28G11.14, F28G11_14                                                                                                                                                                                                                                                                                                                                                                                                                                                                                                                                                                            | 9.3 | 5.9  | 3.3  | 7.6  |
| 16907 AT5G11680.1   expressed protein, predicted proteins, Arabidopsis thaliana   chr5:3758859-3760848 FORWARD   Aliases: T22P22.70, T22P22_70                                                                                                                                                                                                                                                                                                                                                                                                                                                                                                                                                                                                                                                                                                                                                                                                                         | 9.3 | 9.4  | -0.1 | -0.8 |
| 16421 AT5G54640.1   Symbol: RAT5   histone H2A, identical to histone H2A Arabidopsis thaliana GI:7595337   chr5:22213703-22214713 FORWARD   Aliases: MRB17.14, MRB17_14, RESISTANT TO AGROBACTERIUM TRANSFORMATION 5                                                                                                                                                                                                                                                                                                                                                                                                                                                                                                                                                                                                                                                                                                                                                   | 9.3 | 8.9  | 0.3  | 0.9  |
| 8049 AT2G19790.1   clathrin adaptor complex small chain family protein, contains Pfam profile: PF01217 clathrin adaptor complex small chain                                                                                                                                                                                                                                                                                                                                                                                                                                                                                                                                                                                                                                                                                                                                                                                                                            | 9.2 | 7.2  | 2.0  | 3.1  |

|                                                                                                                                                                                                                                                                                                                                                                                                                                                                                                                                                                                                                                                                                                                                                                                                                                                                                                                                                                                                                                                                                 |     |      |      |      |
|---------------------------------------------------------------------------------------------------------------------------------------------------------------------------------------------------------------------------------------------------------------------------------------------------------------------------------------------------------------------------------------------------------------------------------------------------------------------------------------------------------------------------------------------------------------------------------------------------------------------------------------------------------------------------------------------------------------------------------------------------------------------------------------------------------------------------------------------------------------------------------------------------------------------------------------------------------------------------------------------------------------------------------------------------------------------------------|-----|------|------|------|
| 323 AT5G49910.1   Symbol: cpHSC70 2   heat shock protein 70 / HSP70 (HSC70-7), identical to heat shock protein 70 (Arabidopsis thaliana) GI:6746592   chr5:20320640-20324039 FORWARD   Aliases: HEAT SHOCK PROTEIN 70, HEAT SHOCK PROTEIN 70 7, HSC70 7, K9P8.5, K9P8_5                                                                                                                                                                                                                                                                                                                                                                                                                                                                                                                                                                                                                                                                                                                                                                                                         | 9.2 | 5.6  | 3.7  | 14.0 |
| 1897 AT5G27670.1   histone H2A, putative, similar to histone H2A Lycopersicon esculentum SP:P25469, Pisum sativum SP:P25470, Petroselinum crispum SP:P19177; contains Pfam profile PF00125 Core histone H2A/H2B/H3/H4   chr5:9792579-9793458 REVERSE   Aliases: T1G16.3                                                                                                                                                                                                                                                                                                                                                                                                                                                                                                                                                                                                                                                                                                                                                                                                         | 9.2 | 7.6  | 1.7  | 7.6  |
| 20441 AT1G12520.3   Symbol: CCS1   similar to superoxide dismutase (Cu-Zn), chloroplast (SODCP) / copper/zinc superoxide dismutase (CSD2) [Arabidopsis thaliana] (TAIR:At2g28190.1); similar to putative copper/zinc superoxide dismutase copper chaperone precursor [Lycopersicon esculentum] (GB:AAD12307.2); contains InterPro domain Copper/Zinc superoxide dismutase (InterPro:IPR001424)   chr1:4267104-4268884 REVERSE   Aliases: ATCCS, COPPER/ZINC SUPEROXIDE DISMUTASE COPPER CHAPERONE, F5O11.26, F5O11_26                                                                                                                                                                                                                                                                                                                                                                                                                                                                                                                                                           | 9.2 | 9.3  | -0.0 | -0.1 |
| 7963 AT3G22960.1   pyruvate kinase, putative, similar to pyruvate kinase isozyme A, chloroplast precursor (Ricinus communis) SWISS-PROT:Q43117   chr3:8139242-8141992 FORWARD   Aliases: F5N5.15                                                                                                                                                                                                                                                                                                                                                                                                                                                                                                                                                                                                                                                                                                                                                                                                                                                                                | 9.2 | 8.2  | 1.0  | 3.1  |
| 731 AT2G21820.1   expressed protein   chr2:9309965-9310327 REVERSE   Aliases: F7D8.14, F7D8_14                                                                                                                                                                                                                                                                                                                                                                                                                                                                                                                                                                                                                                                                                                                                                                                                                                                                                                                                                                                  | 9.2 | 6.2  | 3.0  | 10.6 |
| 9962 AT3G24160.1   Symbol: PMP   expressed protein, identical to cDNA putative type 1 membrane protein (PMP)GI:4206764   chr3:8726138-8729396 FORWARD   Aliases: MUJ8.6, PUTATIVE TYPE 1 MEMBRANE PROTEIN                                                                                                                                                                                                                                                                                                                                                                                                                                                                                                                                                                                                                                                                                                                                                                                                                                                                       | 9.2 | 10.0 | -0.7 | -2.4 |
| 1734 AT5G44200.1   Symbol: CBP20   nuclear cap-binding protein, putative, similar to SP:P52298 20 kDa nuclear cap binding protein (CBP20) (NCBP interacting protein 1) {Homo sapiens}; non-consensus AT donor splice site at exon 4, AC acceptor splice site at exon 5; contains InterPro entry IPR000504: RNA-binding region RNP-1 (RNA recognition motif) (RRM)   chr5:17819166-17821154 REVERSE   Aliases: ATCBP20, CAP BINDING PROTEIN 20, MLN1.12, MLN1_12                                                                                                                                                                                                                                                                                                                                                                                                                                                                                                                                                                                                                 | 9.2 | 7.2  | 2.0  | 7.8  |
| 879 AT1G04590.2   Symbol: EMB2748   expressed protein, isoform contains GG acceptor splice site at intron 7   chr1:1258577-1261424 REVERSE   Aliases: EMB2748, EMBRYO DEFECTIVE 2748, T1G11.16, T1G11_16                                                                                                                                                                                                                                                                                                                                                                                                                                                                                                                                                                                                                                                                                                                                                                                                                                                                        | 9.2 | 5.2  | 4.0  | 10.0 |
| 203 AT2G38140.1   Symbol: PSRP4   chloroplast 30S ribosomal protein S31 (PSRP4)   chr2:15987961-15988676 FORWARD   Aliases: 30S RIBOSOMAL PROTEIN S31, F16M14.7, F16M14_7, PLASTID SPECIFIC RIBOSOMAL PROTEIN 4                                                                                                                                                                                                                                                                                                                                                                                                                                                                                                                                                                                                                                                                                                                                                                                                                                                                 | 9.2 | 4.1  | 5.1  | 16.6 |
| 2915 AT3G01540.4   Symbol: DRH1   similar to DEAD box RNA helicase, putative [Arabidopsis thaliana] (TAIR:At5g14610.1); similar to DEAD box RNA helicase, putative [Arabidopsis thaliana] (TAIR:At3g06480.1); similar to putative p68 RNA helicase [Oryza sativa (japonica cultivar-group)] (GB:XP_550286.1); similar to putative RNA helicase, DRH1 [Oryza sativa (japonica cultivar-group)] (GB:XP_462826.1); similar to putative RNA helicase, DRH1 [Oryza sativa (japonica cultivar-group)] (GB:NP_918275.1); similar to P72 DEAD box protein [Pisum sativum] (GB:AAF04377.1); similar to putative ATP-dependent RNA helicase DB10 [Oryza sativa (japonica cultivar-group)] (GB:BAD88050.1); contains InterPro domain WW/Rsp5/WWP domain (InterPro:IPR001202); contains InterPro domain ATP-dependent helicase, DEAD-box (InterPro:IPR000629); contains InterPro domain Helicase, C-terminal (InterPro:IPR001650); contains InterPro domain DEAD/DEAH box helicase (InterPro:IPR001410)   chr3:212525-216678 REVERSE   Aliases: ATDRH1, F4P13.9, F4P13_9, RNA HELICASE DRH1 | 9.2 | 10.7 | -1.4 | -6.2 |
| 6542 AT5G59140.1   SKP1 family protein, similar to elongin C, Drosophila melanogaster, GI:2780365 PIR:JC5794; contains Pfam profile PF01466: Skp1 family, dimerisation domain   chr5:23891676-23892910 REVERSE   Aliases: MNC17.5, MNC17_5                                                                                                                                                                                                                                                                                                                                                                                                                                                                                                                                                                                                                                                                                                                                                                                                                                      | 9.2 | 8.1  | 1.2  | 3.7  |
| 7803 AT4G17040.1   ATP-dependent Clp protease proteolytic subunit, putative, similar to ATP-dependent Clp protease proteolytic subunit GI:7264063 from (Synechococcus sp.PCC 7942)   chr4:9585724-9589381 REVERSE   Aliases: DL4550C, FCAALL.413                                                                                                                                                                                                                                                                                                                                                                                                                                                                                                                                                                                                                                                                                                                                                                                                                                | 9.2 | 7.3  | 2.0  | 3.2  |
| 7981 AT3G54640.1   Symbol: TSA1   tryptophan synthase, alpha subunit (TSA1), identical to gi:619753   chr3:20234137-20236501 REVERSE   Aliases: TRP3, TRYPTOPHAN SYNTHASE ALPHA CHAIN                                                                                                                                                                                                                                                                                                                                                                                                                                                                                                                                                                                                                                                                                                                                                                                                                                                                                           | 9.2 | 7.5  | 1.7  | 3.1  |
| 9809 AT1G56200.1   Symbol: EMB1303   expressed protein   chr1:21034480-21035721 FORWARD   Aliases: EMB1303, EMBRYO DEFECTIVE 1303, F14G9.26, F14G9_26                                                                                                                                                                                                                                                                                                                                                                                                                                                                                                                                                                                                                                                                                                                                                                                                                                                                                                                           | 9.2 | 8.6  | 0.6  | 2.4  |
| 37 AT5G16970.1   NADP-dependent oxidoreductase, putative (P1), identical to probable NADP-dependent oxidoreductase P1, zeta-crystallin homolog (SP:Q39172)(gi:886428), Arabidopsis thaliana; similar to allyl alcohol dehydrogenase (Nicotiana tabacum) GI:6692816; contains Pfam profile PF00107: oxidoreductase, zinc-binding dehydrogenase family   chr5:5576171-5578049 REVERSE   Aliases: F2K13.120, F2K13_120                                                                                                                                                                                                                                                                                                                                                                                                                                                                                                                                                                                                                                                             | 9.2 | 3.2  | 6.1  | 27.4 |
| 20355 AT5G22630.1   prephenate dehydratase family protein, contains Pfam profile PF00800: prephenate dehydratase   chr5:7524345-7526163 FORWARD   Aliases: MDJ22.5, MDJ22_5                                                                                                                                                                                                                                                                                                                                                                                                                                                                                                                                                                                                                                                                                                                                                                                                                                                                                                     | 9.2 | 9.1  | 0.1  | 0.1  |
| 8942 AT1G54360.4   similar to TATA box-binding protein-associated factor (TAF) family protein [Arabidopsis thaliana] (TAIR:At1g04950.1); similar to TATA box-binding protein-associated factor (TAF) family protein [Arabidopsis thaliana] (TAIR:At1g04950.2); similar to SPCC16C4.18c [Schizosaccharomyces pombe] (GB:CAA20756.1); contains InterPro domain Histone-fold/TFIID-TAF/NF-Y (InterPro:IPR007124); contains InterPro domain TATA box binding protein associated factor (TAF) (InterPro:IPR004823)   chr1:20294267-20296991 FORWARD   Aliases: F20D21.18, F20D21_18                                                                                                                                                                                                                                                                                                                                                                                                                                                                                                  | 9.2 | 8.8  | 0.5  | 2.7  |
| 3622 AT1G20580.1   small nuclear ribonucleoprotein, putative / snRNP, putative / Sm protein, putative, similar to small nuclear ribonucleoprotein Sm D3 (snRNP core protein D3, Sm-D3) (Mus musculus) SWISS-PROT:P43331   chr1:7128878-7130631 FORWARD   Aliases: F5M15.9, F5M15_9                                                                                                                                                                                                                                                                                                                                                                                                                                                                                                                                                                                                                                                                                                                                                                                              | 9.2 | 7.7  | 1.6  | 5.5  |

|                   |                                                                                                                                                                                                                                                                                                                                                                                                                                                                                                                                                                             |     |      |      |      |
|-------------------|-----------------------------------------------------------------------------------------------------------------------------------------------------------------------------------------------------------------------------------------------------------------------------------------------------------------------------------------------------------------------------------------------------------------------------------------------------------------------------------------------------------------------------------------------------------------------------|-----|------|------|------|
| 199 AT5G62610.1   | basic helix-loop-helix (bHLH) family protein, contains Pfam profile: PF00010 helix-loop-helix DNA-binding domain                                                                                                                                                                                                                                                                                                                                                                                                                                                            | 9.2 | 5.0  | 4.2  | 16.6 |
| 4543 AT2G17130.2  | Symbol: IDH2   isocitrate dehydrogenase subunit 2 / NAD+ isocitrate dehydrogenase subunit 2, nearly identical to NAD+ dependent isocitrate dehydrogenase subunit 2 (Arabidopsis thaliana) GI:1766048   chr2:7467896-7469636 REVERSE   Aliases: F6P23.14, F6P23_14, ISOCITRATE DEHYDROGENASE SUBUNIT 2, NAD+ DEPENDENT ISOCITRATE DEHYDROGENASE SUBUNIT 2                                                                                                                                                                                                                    | 9.2 | 10.7 | -1.5 | -4.9 |
| 545 AT1G33810.1   | expressed protein   chr1:12265050-12266827 FORWARD   Aliases: F14M2.27                                                                                                                                                                                                                                                                                                                                                                                                                                                                                                      | 9.2 | 4.4  | 4.8  | 11.7 |
| 10148 AT3G02740.1 | aspartyl protease family protein, contains Pfam profile: PF00026 eukaryotic aspartyl protease   chr3:590517-593174 FORWARD   Aliases: F13E7.32, F13E7_32                                                                                                                                                                                                                                                                                                                                                                                                                    | 9.2 | 9.7  | -0.4 | -2.3 |
| 2823 AT5G53850.3  | haloacid dehalogenase-like hydrolase family protein, low similarity to enolase-phosphatase E-1 enzyme (Klebsiella oxytoca) GI:401712; contains InterPro accession IPR005834: Haloacid dehalogenase-like hydrolase   chr5:21878223-21882133 REVERSE   Aliases: K19P17.1, K19P17_1                                                                                                                                                                                                                                                                                            | 9.2 | 10.5 | -1.2 | -6.3 |
| 10838 AT1G04850.1 | ubiquitin-associated (UBA)/TS-N domain-containing protein, weak similarity to SP:P45974 Ubiquitin carboxyl-terminal hydrolase 5 (EC 3.1.2.15) {Homo sapiens}; contains Pfam profile PF00627: UBA/TS-N domain   chr1:1365118-1368792 REVERSE   Aliases: F13M7.16, F13M7_16                                                                                                                                                                                                                                                                                                   | 9.2 | 8.6  | 0.6  | 2.1  |
| 5576 AT2G23610.1  | esterase, putative, similar to ethylene-induced esterase (Citrus sinensis) GI:14279437, polyneuridine aldehyde esterase (Rauvolfia serpentina) GI:6651393; contains Pfam profile PF00561: hydrolase, alpha/beta fold family   chr2:10051259-10053612 REVERSE   Aliases: F26B6.26, F26B6_26                                                                                                                                                                                                                                                                                  | 9.2 | 6.4  | 2.8  | 4.2  |
| 8542 AT3G13200.1  | Cwf15 / Cwc15 cell cycle control family protein, contains Pfam profile PF04889: Cwf15/Cwc15 cell cycle control protein; similar to Cell cycle control protein cwf15 (Swiss-Prot:P78794) (Schizosaccharomyces pombe)   chr3:4242132-4244140 FORWARD   Aliases: MJG19.16                                                                                                                                                                                                                                                                                                      | 9.2 | 8.2  | 1.0  | 2.9  |
| 7658 AT3G10920.2  | Symbol: MSD1   similar to superoxide dismutase (Mn), putative / manganese superoxide dismutase, putative [Arabidopsis thaliana] (TAIR:At3g56350.1); similar to superoxide dismutase [Raphanus sativus] (GB:AAL07333.1); contains InterPro domain Manganese and iron superoxide dismutase (InterPro:IPR001189)   chr3:3417982-3419858 FORWARD   Aliases: F9F8.26, MANGANESE SUPEROXIDE DISMUTASE 1                                                                                                                                                                           | 9.2 | 7.1  | 2.1  | 3.3  |
| 9884 AT3G63000.1  | NPL4 family protein, contains Pfam domain, PF05021: NPL4 family   chr3:23294584-23296515 FORWARD   Aliases: T20O10.100                                                                                                                                                                                                                                                                                                                                                                                                                                                      | 9.2 | 9.8  | -0.6 | -2.4 |
| 732 AT3G03490.1   | peroxisomal protein PEX19 family protein, contains Pfam profile: PF04614 Pex19 protein family   chr3:830172-831853 REVERSE   Aliases: T21P5.9, T21P5_9                                                                                                                                                                                                                                                                                                                                                                                                                      | 9.2 | 7.0  | 2.2  | 10.6 |
| 5466 AT1G70480.2  | expressed protein, similar to expressed protein [Arabidopsis thaliana] (TAIR:At1g23560.1); contains InterPro domain Protein of unknown function DUF220 (InterPro:IPR003863)   chr1:26565722-26567472 FORWARD   Aliases: F24J13.5, F24J13_5                                                                                                                                                                                                                                                                                                                                  | 9.2 | 7.2  | 2.0  | 4.3  |
| 3181 AT5G41210.1  | Symbol: ATGSTT1   glutathione S-transferase (GST10), identical to glutathione transferase AtGST 10 (Arabidopsis thaliana) GI:4049401   chr5:16509603-16511126 REVERSE   Aliases: GST10, MEE6.28, MEE6_28                                                                                                                                                                                                                                                                                                                                                                    | 9.2 | 7.3  | 1.9  | 5.9  |
| 20859 AT5G46620.1 | expressed protein, similar to unknown protein (pir::T05082)   chr5:18934886-18936647 REVERSE   Aliases: F10E10.1, F10E10_1                                                                                                                                                                                                                                                                                                                                                                                                                                                  | 9.2 | 9.2  | -0.0 | -0.1 |
| 3383 AT5G28060.1  | 40S ribosomal protein S24 (RPS24B), 40S ribosomal protein S19, Cyanophora paradoxa, EMBL:CPA245654   chr5:10069553-10070897 REVERSE   Aliases: F15F15.130, F15F15_130                                                                                                                                                                                                                                                                                                                                                                                                       | 9.2 | 6.9  | 2.3  | 5.7  |
| 6081 AT2G26240.1  | expressed protein, contains Pfam profile PF03647: Uncharacterised protein family (UPF0136)   chr2:11174335-11175535 REVERSE   Aliases: T1D16.12, T1D16_12                                                                                                                                                                                                                                                                                                                                                                                                                   | 9.2 | 9.9  | -0.7 | -4.0 |
| 13848 AT5G51410.2 | LUC7 N_terminus domain-containing protein, similar to cisplatin resistance-associated overexpressed protein (Homo sapiens) GI:6899846; contains Pfam profile PF03194: LUC7 N_terminus   chr5:20897967-20900930 REVERSE   Aliases: MFG13.12, MFG13_12                                                                                                                                                                                                                                                                                                                        | 9.2 | 10.0 | -0.8 | -1.4 |
| 4695 AT4G39280.1  | phenylalanyl-tRNA synthetase, putative / phenylalanine--tRNA ligase, putative, similar to SP:Q9Y285 Phenylalanyl-tRNA synthetase alpha chain (EC 6.1.1.20) (Phenylalanine- -tRNA ligase alpha chain) (PheRS) {Homo sapiens}; contains Pfam profile PF01409: tRNA synthetases class II core domain (F)   chr4:18281456-18284843 REVERSE   Aliases: T22F8.180, T22F8_180                                                                                                                                                                                                      | 9.2 | 6.9  | 2.3  | 4.8  |
| 7570 AT5G47720.5  | similar to acetyl-CoA C-acyltransferase, putative / 3-ketoacyl-CoA thiolase, putative [Arabidopsis thaliana] (TAIR:At5g48230.2); similar to acetyl-CoA C-acyltransferase, putative / 3-ketoacyl-CoA thiolase, putative [Arabidopsis thaliana] (TAIR:At5g48230.1); similar to cytosolic acetoacetyl-coenzyme A thiolase [Nicotiana tabacum] (GB:AAU95618.1); similar to peroxisomal acetoacetyl-coenzyme A thiolase [Nicotiana tabacum] (GB:AAU95619.1); contains InterPro domain Thiolase (InterPro:IPR002155)   chr5:19348883-19352038 FORWARD   Aliases: MCA23.4, MCA23_4 | 9.2 | 10.1 | -0.9 | -3.3 |
| 2165 AT1G14450.1  | expressed protein, contains similarity to cytochrome c oxidase subunit I GI:5678701 from (Loligo pealei)                                                                                                                                                                                                                                                                                                                                                                                                                                                                    | 9.2 | 7.6  | 1.7  | 7.2  |
| 2653 AT5G64250.2  | 2-nitropropane dioxygenase family / NPD family, contains Pfam profile PF03060: oxidoreductase, 2-nitropropane dioxygenase (NPD) family   chr5:25714450-25716438 REVERSE   Aliases: MSJ1.9, MSJ1_9                                                                                                                                                                                                                                                                                                                                                                           | 9.2 | 10.6 | -1.4 | -6.5 |



|                                                                                                                                                                                                                                                                                                                                                                                                                                                                                                                          |     |      |      |      |
|--------------------------------------------------------------------------------------------------------------------------------------------------------------------------------------------------------------------------------------------------------------------------------------------------------------------------------------------------------------------------------------------------------------------------------------------------------------------------------------------------------------------------|-----|------|------|------|
| 7050 AT3G25470.1   bacterial hemolysin-related, similar to hemolysine GB:AAD36643 from ( <i>Thermotoga maritima</i> ), contains Pfam profile: PF01479 S4 domain   chr3:9234178-9236450 FORWARD   Aliases: MWL2.14                                                                                                                                                                                                                                                                                                        | 9.2 | 8.8  | 0.4  | 3.5  |
| 3782 AT3G49910.1   60S ribosomal protein L26 (RPL26A), 60S RIBOSOMAL PROTEIN L26, <i>Brassica rapa</i> , EMBL:BRD495   chr3:18515241-18515952 FORWARD   Aliases: F3A4.4                                                                                                                                                                                                                                                                                                                                                  | 9.2 | 7.5  | 1.8  | 5.4  |
| 6314 AT1G80830.1   Symbol: NRAMP1                                                                                                                                                                                                                                                                                                                                                                                                                                                                                        | 9.2 | 10.5 | -1.3 | -3.9 |
| 5970 AT2G33210.1   chaperonin, putative, similar to SWISS-PROT:Q05046- chaperonin CPN60-2, mitochondrial precursor (HSP60-2) ( <i>Cucurbita maxima</i> ); contains Pfam:PF00118 domain, TCP-1/cpn60 chaperonin family   chr2:14081986-14085797 REVERSE   Aliases: F25I18.5, F25I18_5                                                                                                                                                                                                                                     | 9.2 | 7.8  | 1.4  | 4.0  |
| 6536 AT4G22000.1   expressed protein   chr4:11659650-11660916 REVERSE   Aliases: F1N20.100, F1N20_100                                                                                                                                                                                                                                                                                                                                                                                                                    | 9.2 | 7.8  | 1.4  | 3.7  |
| 9220 AT3G17780.1   expressed protein   chr3:6086954-6088342 FORWARD   Aliases: MIG5.8                                                                                                                                                                                                                                                                                                                                                                                                                                    | 9.2 | 8.2  | 1.0  | 2.6  |
| 7253 AT1G16470.2   Symbol: PAB1   similar to 20S proteasome alpha subunit D2 (PAD2) (PRS1) (PRC6) [ <i>Arabidopsis thaliana</i> ] (TAIR:At5g66140.1); similar to proteasome subunit alpha type 2 [ <i>Oryza sativa</i> ( <i>japonica</i> cultivar-group)] (GB:AAT78811.1); contains InterPro domain Proteasome subunit, A-type (InterPro:IPR000426); contains InterPro domain Multispecific proteasome protease (InterPro:IPR001353)   chr1:5622832-5625637 FORWARD   Aliases: F3O9.27, F3O9_27, PROTEASOME SUBUNIT PAB1 | 9.2 | 7.6  | 1.6  | 3.4  |
| 671 AT5G54600.2   50S ribosomal protein L24, chloroplast (CL24), identical to SP:P92959 50S ribosomal protein L24, chloroplast precursor { <i>Arabidopsis thaliana</i> }   chr5:22200204-22201793 FORWARD   Aliases: MRB17.10, MRB17_10                                                                                                                                                                                                                                                                                  | 9.2 | 6.5  | 2.7  | 10.9 |
| 4239 AT2G47400.1   Symbol: CP12 1                                                                                                                                                                                                                                                                                                                                                                                                                                                                                        | 9.2 | 7.7  | 1.5  | 5.1  |
| 3011 AT2G40360.1   transducin family protein / WD-40 repeat family protein, contains 4 WD-40 repeats (PF00400); similar to block of proliferation protein Bop1 (GI:1679772) ( <i>Mus musculus</i> )   chr2:16859958-16863768 REVERSE   Aliases: T3G21.13, T3G21_13                                                                                                                                                                                                                                                       | 9.2 | 7.9  | 1.3  | 6.1  |
| 14269 AT1G68220.1   expressed protein   chr1:25573894-25575375 FORWARD   Aliases: T22E19.15, T22E19_15                                                                                                                                                                                                                                                                                                                                                                                                                   | 9.2 | 9.5  | -0.3 | -1.3 |
| 4658 AT3G17210.1   stable protein 1-related, similar to stable protein 1 (GI:13445204) ( <i>Populus tremula</i> ) PMID:12376651; similar to pop3 peptide GB:AAC26526 from ( <i>Populus balsamifera</i> subsp. <i>trichocarpa</i> X <i>Populus deltoides</i> )   chr3:5882290-5883206 FORWARD   Aliases: MGD8.2                                                                                                                                                                                                           | 9.2 | 7.9  | 1.3  | 4.8  |
| 17348 AT4G02080.1   Symbol: ASAR1   GTP-binding protein (SAR1A), identical to SP:O04834 GTP-binding protein SAR1A. ( <i>Arabidopsis thaliana</i> )   chr4:921462-922776 FORWARD   Aliases: ATSAR2, ATSARA1C, T10M13.9, T10M13_9                                                                                                                                                                                                                                                                                          | 9.2 | 9.5  | -0.3 | -0.7 |
| 8462 AT3G45010.1   Symbol: SCPL48                                                                                                                                                                                                                                                                                                                                                                                                                                                                                        | 9.2 | 10.2 | -1.0 | -2.9 |
| 7106 AT4G09570.1   Symbol: CPK4   calcium-dependent protein kinase, putative / CDPK, putative, similar to calcium-dependent protein kinase ( <i>Arabidopsis thaliana</i> ) gi:604881:dbj:BAA04830; contains protein kinase domain, Pfam:PF00069; contains EF hand domain (calcium-binding EF-hand), Pfam:PF00036, INTERPRO:IPR002048   chr4:6049518-6052332 FORWARD   Aliases: T25P22.10, T25P22_10                                                                                                                      | 9.2 | 8.3  | 0.9  | 3.5  |
| 10848 AT1G77350.2   similar to Krtcap2 protein [ <i>Mus musculus</i> ] (GB:AAH43030.1); similar to keratinocytes associated protein 2 [ <i>Mus musculus</i> ] (GB:NP_079603.1); similar to ENSANGP00000016671 [ <i>Anopheles gambiae</i> str. PEST] (GB:XP_312812.2)   chr1:29075214-29076793 FORWARD   Aliases: F2P24.6, F2P24_6                                                                                                                                                                                        | 9.2 | 8.6  | 0.6  | 2.1  |
| 10339 AT1G19600.1   pfkB-type carbohydrate kinase family protein, contains Pfam profile: PF00294 pfkB family carbohydrate kinase   chr1:6779015-6781164 FORWARD   Aliases: F14P1.7, F14P1_7                                                                                                                                                                                                                                                                                                                              | 9.2 | 8.4  | 0.8  | 2.3  |
| 4948 AT5G59850.1   40S ribosomal protein S15A (RPS15aF), cytoplasmic ribosomal protein S15a, <i>Arabidopsis thaliana</i> , EMBL:ATAF1412   chr5:24129426-24130836 REVERSE   Aliases: MMN10.16                                                                                                                                                                                                                                                                                                                            | 9.2 | 7.0  | 2.2  | 4.6  |
| 18582 AT4G37120.1   Symbol: SMP2   expressed protein   chr4:17486641-17489282 FORWARD   Aliases: AP22.39, AP22_39                                                                                                                                                                                                                                                                                                                                                                                                        | 9.2 | 9.1  | 0.1  | 0.5  |
| 17806 AT2G16510.1   Symbol: AVA P1                                                                                                                                                                                                                                                                                                                                                                                                                                                                                       | 9.2 | 8.9  | 0.3  | 0.6  |
| 4539 AT5G06360.1   ribosomal protein S8e family protein, contains Pfam profile PF01201: Ribosomal protein S8e   chr5:1944772-1946725 FORWARD   Aliases: MHF15.12, MHF15_12                                                                                                                                                                                                                                                                                                                                               | 9.2 | 6.9  | 2.3  | 4.9  |
| 6337 AT5G66140.1   Symbol: PAD2   20S proteasome alpha subunit D2 (PAD2) (PRS1) (PRC6), identical to SP:O24616 Proteasome subunit alpha type 7-2 (EC 3.4.25.1) (20S proteasome alpha subunit D2) { <i>Arabidopsis thaliana</i> }   chr5:26454396-26455947 REVERSE   Aliases: 20S PROTEASOME SUBUNIT PAD2, K2A18.22, K2A18_22                                                                                                                                                                                             | 9.2 | 7.1  | 2.1  | 3.8  |
| 2050 AT3G22230.1   60S ribosomal protein L27 (RPL27B), similar to 60S RIBOSOMAL PROTEIN L27 GB:P41101 from ( <i>Solanum tuberosum</i> )   chr3:7843974-7844604 REVERSE   Aliases: MKA23.22                                                                                                                                                                                                                                                                                                                               | 9.2 | 6.8  | 2.4  | 7.3  |

|                                                                                                                                                                                                                                                                                                                                                                                                                                                                                                                                                        |     |      |      |       |
|--------------------------------------------------------------------------------------------------------------------------------------------------------------------------------------------------------------------------------------------------------------------------------------------------------------------------------------------------------------------------------------------------------------------------------------------------------------------------------------------------------------------------------------------------------|-----|------|------|-------|
| 3418 AT1G63980.2   similar to aldose 1-epimerase family protein [Arabidopsis thaliana] (TAIR:At5g15140.1); similar to CG11180-PA [Drosophila melanogaster] (GB:NP_611495.1); contains InterPro domain D111/G-patch domain (InterPro:IPR000467)   chr1:23744225-23746965 FORWARD   Aliases: F22C12.25, F22C12_25                                                                                                                                                                                                                                        | 9.2 | 7.4  | 1.8  | 5.7   |
| 13032 AT5G54870.1   expressed protein, strong similarity to unknown protein (pir::T04825)   chr5:22306361-22309025 FORWARD   Aliases: MBG8.14, MBG8_14                                                                                                                                                                                                                                                                                                                                                                                                 | 9.2 | 9.7  | -0.6 | -1.6  |
| 7039 AT5G62200.1   embryo-specific protein-related, contains weak similarity to embryo-specific protein 3 (GI:3335171) (Arabidopsis thaliana)   chr5:25001494-25002900 REVERSE   Aliases: MMI9.3, MMI9_3                                                                                                                                                                                                                                                                                                                                               | 9.2 | 7.3  | 1.9  | 3.5   |
| 2666 AT5G65110.2   Symbol: ACX2   similar to acyl-CoA oxidase, putative [Arabidopsis thaliana] (TAIR:At1g06310.1); similar to acyl-CoA oxidase homolog [Phalaenopsis sp. 'True Lady'] (GB:AAB67883.1); similar to acyl-CoA oxidase [Phalaenopsis cv. 'True Lady'] (GB:AAR00586.1); similar to acyl CoA oxidase homolog [Cucurbita sp. cv. Kurokawa Amakuri] (GB:AAC15870.1); contains InterPro domain Acyl-CoA dehydrogenase, C-terminal (InterPro:IPR006090)   chr5:26026861-26029745 REVERSE   Aliases: ACYL COA OXIDASE 2, ATACX2, MQN23.4, MQN23_4 | 9.2 | 10.8 | -1.7 | -6.5  |
| 6728 AT1G72500.1   inter-alpha-trypsin inhibitor heavy chain-related, low similarity to Inter-alpha-inhibitor H4 heavy chain (Rattus norvegicus) GI:2292988; contains Pfam profile PF00092: von Willebrand factor type A domain   chr1:27298998-27302218 REVERSE   Aliases: T10D10.3, T10D10_3                                                                                                                                                                                                                                                         | 9.2 | 10.2 | -1.0 | -3.7  |
| 13764 AT5G15460.2   expressed protein   chr5:5018774-5020656 REVERSE   Aliases: T20K14.70, T20K14_70                                                                                                                                                                                                                                                                                                                                                                                                                                                   | 9.2 | 8.5  | 0.7  | 1.4   |
| 5451 AT2G46100.1   expressed protein   chr2:18960353-18962069 FORWARD   Aliases: T3F17.25                                                                                                                                                                                                                                                                                                                                                                                                                                                              | 9.2 | 7.8  | 1.3  | 4.3   |
| 5590 AT1G77180.2   similar to RNA recognition motif (RRM)-containing protein [Arabidopsis thaliana] (TAIR:At2g16940.1); similar to WD-40 repeat family protein [Arabidopsis thaliana] (TAIR:At5g67320.1); similar to GAMYB-binding protein [Hordeum vulgare subsp. vulgare] (GB:AAO25542.1); contains InterPro domain SKIP/SNW domain (InterPro:IPR004015)   chr1:29004502-29007019 REVERSE   Aliases: T14N5.5, T14N5_5                                                                                                                                | 9.2 | 10.1 | -0.9 | -4.2  |
| 19878 AT3G53110.1   Symbol: LOS4   DEAD/DEAH box helicase, putative, RNA helicase, Mus musculus, PIR:I49731                                                                                                                                                                                                                                                                                                                                                                                                                                            | 9.2 | 9.1  | 0.0  | 0.2   |
| 15091 AT1G53310.3   Symbol: ATPPC1                                                                                                                                                                                                                                                                                                                                                                                                                                                                                                                     | 9.2 | 10.1 | -1.0 | -1.1  |
| 466 AT1G09815.1   DNA polymerase delta subunit 4 family, contains similarity to Swiss-Prot:Q9HCU8 DNA polymerase delta subunit 4 (DNA polymerase delta subunit p12) (Homo sapiens)                                                                                                                                                                                                                                                                                                                                                                     | 9.2 | 7.3  | 1.9  | 12.2  |
| 190 AT4G28750.1   Symbol: PSAE1   photosystem I reaction center subunit IV, chloroplast, putative / PSI-E, putative (PSAE1), identical to SP:Q9S831; similar to SP:P12354 Photosystem I reaction center subunit IV, chloroplast precursor (PSI-E) {Spinacia oleracea}; contains Pfam profile PF02427: Photosystem I reaction centre subunit IV / PsaE   chr4:14202779-14203961 REVERSE   Aliases: F16A16.140, F16A16_140, PSA E1 KNOCKOUT                                                                                                              | 9.2 | 3.7  | 5.5  | 16.7  |
| 955 AT1G60000.2   29 kDa ribonucleoprotein, chloroplast, putative / RNA-binding protein cp29, putative, similar to 29 kDa ribonucleoprotein chloroplast precursor {Nicotiana glauca} SP:Q08935, SP:Q08937; contains InterPro entry IPR000504: RNA-binding region RNP-1 (RNA recognition motif) (RRM) contains an AG-donor site at intron.   chr1:22097238-22098227 REVERSE   Aliases: T2K10.5, T2K10_5                                                                                                                                                 | 9.2 | 5.8  | 3.4  | 9.7   |
| 15349 AT5G60620.1   phospholipid/glycerol acyltransferase family protein, contains Pfam PF01553: Acyltransferase   chr5:24384442-24387015 FORWARD   Aliases: MUP24.4, MUP24_4                                                                                                                                                                                                                                                                                                                                                                          | 9.2 | 9.6  | -0.5 | -1.1  |
| 2433 AT1G47128.1   cysteine proteinase (RD21A) / thiol protease, identical to SP:P43297 Cysteine proteinase RD21A precursor (EC 3.4.22.-) {Arabidopsis thaliana}, thiol protease RD21A SP:P43297 from (Arabidopsis thaliana)   chr1:17285265-17288110 REVERSE   Aliases: F2G19.31, F2G19_31                                                                                                                                                                                                                                                            | 9.2 | 11.7 | -2.6 | -6.8  |
| 706 AT4G32060.1   calcium-binding EF hand family protein, contains INTERPRO:IPR002048 calcium-binding EF-hand domain   chr4:15501084-15503599 FORWARD   Aliases: F10N7.140, F10N7_140                                                                                                                                                                                                                                                                                                                                                                  | 9.2 | 11.5 | -2.3 | -10.7 |
| 21060 AT1G23800.1   Symbol: ALDH2B7   aldehyde dehydrogenase, mitochondrial (ALDH3), nearly identical to mitochondrial aldehyde dehydrogenase ALDH3 (Arabidopsis thaliana) gi:19850249;gb:AAL99612; contains Pfam profile PF00171: aldehyde dehydrogenase (NAD) family protein   chr1:8412041-8414868 REVERSE   Aliases: ALDH2B, F5O8.35, F5O8_35                                                                                                                                                                                                      | 9.2 | 9.2  | 0.0  | 0.0   |
| 1826 AT1G20340.1   Symbol: DRT112                                                                                                                                                                                                                                                                                                                                                                                                                                                                                                                      | 9.2 | 4.9  | 4.3  | 7.7   |
| 20480 AT4G25650.2   Rieske (2Fe-2S) domain-containing protein, similar to cell death suppressor protein lls1 from Zea mays (gi:1935909), Rieske iron-sulfur protein Tic55 from Pisum sativum (gi:2764524); contains Pfam PF00355 Rieske (2Fe-2S) domain   chr4:13080914-13083206 REVERSE   Aliases: L73G19.30, L73G19_30                                                                                                                                                                                                                               | 9.2 | 9.1  | 0.0  | 0.1   |
| 6836 AT5G16070.1   chaperonin, putative, similar to SWISS-PROT:P80317 T-complex protein 1, zeta subunit (TCP-1-zeta) (Mus musculus); contains Pfam:PF00118 domain, TCP-1/cpn60 chaperonin family   chr5:5247357-5251182 REVERSE   Aliases: F1N13.210, F1N13_210                                                                                                                                                                                                                                                                                        | 9.2 | 7.3  | 1.8  | 3.6   |

|                                                                                                                                                                                                                                                                                                                                                                                                                                                                                                                                                                                                                                                                                                                                                                                                                                                                                                                                                                                                                                                                             |     |      |      |      |
|-----------------------------------------------------------------------------------------------------------------------------------------------------------------------------------------------------------------------------------------------------------------------------------------------------------------------------------------------------------------------------------------------------------------------------------------------------------------------------------------------------------------------------------------------------------------------------------------------------------------------------------------------------------------------------------------------------------------------------------------------------------------------------------------------------------------------------------------------------------------------------------------------------------------------------------------------------------------------------------------------------------------------------------------------------------------------------|-----|------|------|------|
| 3597 AT1G52760.1   esterase/lipase/thioesterase family protein, low similarity to monoglyceride lipase from (Homo sapiens) GI:14594904, (Mus musculus) GI:2632162; contains Interpro entry IPR000379   chr1:19655013-19656411 FORWARD   Aliases: F14G24.3, F14G24_3                                                                                                                                                                                                                                                                                                                                                                                                                                                                                                                                                                                                                                                                                                                                                                                                         | 9.2 | 11.0 | -1.9 | -5.6 |
| 1177 AT1G16340.2   similar to 2-dehydro-3-deoxyphosphooctonate aldolase / phospho-2-dehydro-3-deoxyoctonate aldolase / 3-deoxy-D-manno-octulosonic acid 8-phosphate synthetase (KDSA) [Arabidopsis thaliana] (TAIR:At1g79500.1); similar to 2-dehydro-3-deoxyphosphooctonate aldolase / phospho-2-dehydro-3-deoxyoctonate aldolase / 3-deoxy-D-manno-octulosonic acid 8-phosphate synthetase (KDSA) [Arabidopsis thaliana] (TAIR:At1g79500.3); similar to 2-dehydro-3-deoxyphosphooctonate aldolase / phospho-2-dehydro-3-deoxyoctonate aldolase / 3-deoxy-D-manno-octulosonic acid 8-phosphate synthetase (KDSA) [Arabidopsis thaliana] (TAIR:At1g79500.2); similar to 3-desoxy-D-manno octulosonic acid-8-phosphate synthase [Lycopersicon esculentum] (GB:CAC35366.1); similar to putative 2-dehydro-3-deoxyphosphooctonate aldolase [Oryza sativa (japonica cultivar-group)] (GB:AAO72599.1); contains InterPro domain DAHP synthetase I/KDSA superfamily (InterPro:IPR006218); contains InterPro domain 2-dehydro-3-deoxyphosphooctonate aldolase (InterPro:IPR006269) | 9.2 | 5.5  | 3.7  | 9.0  |
| 5184 AT5G58375.1   expressed protein   chr5:23613500-23614186 FORWARD   Aliases: None                                                                                                                                                                                                                                                                                                                                                                                                                                                                                                                                                                                                                                                                                                                                                                                                                                                                                                                                                                                       | 9.2 | 10.8 | -1.6 | -4.5 |
| 16377 AT5G10860.1   CBS domain-containing protein, contains Pfam profile PF00571: CBS domain                                                                                                                                                                                                                                                                                                                                                                                                                                                                                                                                                                                                                                                                                                                                                                                                                                                                                                                                                                                | 9.2 | 9.8  | -0.7 | -0.9 |
| 5307 AT1G55330.1   Symbol: AGP21   arabinogalactan-protein (AGP21)                                                                                                                                                                                                                                                                                                                                                                                                                                                                                                                                                                                                                                                                                                                                                                                                                                                                                                                                                                                                          | 9.2 | 10.7 | -1.6 | -4.4 |
| 1271 AT3G16100.1   Ras-related GTP-binding family protein, contains Pfam profile: PF00071 Ras family   chr3:5459178-5460783 FORWARD   Aliases: MSL1.14                                                                                                                                                                                                                                                                                                                                                                                                                                                                                                                                                                                                                                                                                                                                                                                                                                                                                                                      | 9.2 | 6.4  | 2.8  | 8.8  |
| 10378 AT2G01060.2   myb family transcription factor, contains Pfam profile: PF00249 myb-like DNA-binding domain   chr2:73258-75341 REVERSE   Aliases: F23H14.3, F23H14_3                                                                                                                                                                                                                                                                                                                                                                                                                                                                                                                                                                                                                                                                                                                                                                                                                                                                                                    | 9.2 | 9.6  | -0.5 | -2.3 |
| 18188 AT1G21680.1   expressed protein, similar to TolB protein precursor (SP:Q9ZDM5) {Rickettsia prowazekii}; ESTs gb:N96028, gb:F14286, gb:T20680, gb:F14443, gb:AA657300 and gb:N65244 come from this gene                                                                                                                                                                                                                                                                                                                                                                                                                                                                                                                                                                                                                                                                                                                                                                                                                                                                | 9.2 | 9.4  | -0.3 | -0.5 |
| 4954 AT1G06780.1   glycosyl transferase family 8 protein, contains Pfam profile: PF01501 glycosyl transferase family 8   chr1:2083423-2086961 FORWARD   Aliases: F4H5.13, F4H5_13                                                                                                                                                                                                                                                                                                                                                                                                                                                                                                                                                                                                                                                                                                                                                                                                                                                                                           | 9.2 | 10.9 | -1.7 | -4.6 |
| 19606 AT5G54540.1   expressed protein   chr5:22173738-22175280 FORWARD   Aliases: MRB17.4, MRB17_4                                                                                                                                                                                                                                                                                                                                                                                                                                                                                                                                                                                                                                                                                                                                                                                                                                                                                                                                                                          | 9.2 | 9.3  | -0.1 | -0.3 |
| 18729 AT3G20510.1   expressed protein, contains Pfam profile PF03647: Uncharacterised protein family (UPF0136)   chr3:7160683-7161997 FORWARD   Aliases: K10D20.5                                                                                                                                                                                                                                                                                                                                                                                                                                                                                                                                                                                                                                                                                                                                                                                                                                                                                                           | 9.2 | 9.2  | -0.1 | -0.4 |
| 5784 AT5G38480.2   Symbol: GRF3   similar to 14-3-3 protein GF14 nu (GRF7) [Arabidopsis thaliana] (TAIR:At3g02520.1); similar to 14-3-3 e-1 protein [Nicotiana tabacum] (GB:BAD12176.1); similar to 14-3-3 e-2 protein [Nicotiana tabacum] (GB:BAD12177.1); contains InterPro domain 14-3-3 protein (InterPro:IPR000308)   chr5:15426927-15428746 FORWARD   Aliases: GENERAL REGULATORY FACTOR 3, GF14PSI ISOFORM, MXI10.21, MXI10_21, RCI1                                                                                                                                                                                                                                                                                                                                                                                                                                                                                                                                                                                                                                 | 9.2 | 7.0  | 2.2  | 4.1  |
| 1854 AT3G14430.1   expressed protein   chr3:4824204-4824844 REVERSE   Aliases: MOA2.3                                                                                                                                                                                                                                                                                                                                                                                                                                                                                                                                                                                                                                                                                                                                                                                                                                                                                                                                                                                       | 9.2 | 10.0 | -0.8 | -7.6 |
| 624 AT2G45710.1   40S ribosomal protein S27 (RPS27A)   chr2:18838235-18839281 FORWARD   Aliases: F4I18.31                                                                                                                                                                                                                                                                                                                                                                                                                                                                                                                                                                                                                                                                                                                                                                                                                                                                                                                                                                   | 9.2 | 5.7  | 3.5  | 11.1 |
| 17497 AT2G38870.1   protease inhibitor, putative, similar to SP:P24076 Glu S.griseus protease inhibitor (BGIA) {Momordica charantia}; contains Pfam profile PF00280: Potato inhibitor I family   chr2:16243459-16244358 REVERSE   Aliases: T7F6.4, T7F6_4                                                                                                                                                                                                                                                                                                                                                                                                                                                                                                                                                                                                                                                                                                                                                                                                                   | 9.2 | 9.4  | -0.3 | -0.7 |
| 3523 AT2G33250.1   expressed protein   chr2:14104509-14105788 FORWARD   Aliases: F25I18.1, F25I18_1                                                                                                                                                                                                                                                                                                                                                                                                                                                                                                                                                                                                                                                                                                                                                                                                                                                                                                                                                                         | 9.2 | 7.8  | 1.3  | 5.6  |
| 6973 AT2G17265.1   Symbol: HSK   homoserine kinase (HSK), identical to homoserine kinase (Arabidopsis thaliana) gi:4927412:gb:AAD33097   chr2:7515670-7516837 FORWARD   Aliases: F5J6.24, F5J6_24, HOMOSERINE KINASE                                                                                                                                                                                                                                                                                                                                                                                                                                                                                                                                                                                                                                                                                                                                                                                                                                                        | 9.2 | 7.0  | 2.2  | 3.5  |
| 17749 AT5G12390.1   expressed protein   chr5:4010444-4012040 REVERSE   Aliases: None                                                                                                                                                                                                                                                                                                                                                                                                                                                                                                                                                                                                                                                                                                                                                                                                                                                                                                                                                                                        | 9.2 | 9.3  | -0.2 | -0.6 |
| 1565 AT3G20790.1   oxidoreductase family protein, weak similarity to SP:Q07982 Glucose--fructose oxidoreductase precursor (EC 1.1.99.28) {Zymomonas mobilis}; contains Pfam profiles PF01408: Oxidoreductase family NAD-binding Rossmann fold, PF02894: Oxidoreductase family C-terminal alpha/beta domain   chr3:7268768-7271517 FORWARD   Aliases: MOE17.10                                                                                                                                                                                                                                                                                                                                                                                                                                                                                                                                                                                                                                                                                                               | 9.2 | 6.9  | 2.3  | 8.1  |
| 5258 AT3G51260.2   Symbol: PAD1   similar to 20S proteasome alpha subunit D2 (PAD2) (PRS1) (PRC6) [Arabidopsis thaliana] (TAIR:At5g66140.1); similar to proteasome alpha subunit [Oryza sativa (japonica cultivar-group)] (GB:XP_483663.1); similar to proteasome alpha subunit [Lycopersicon esculentum] (GB:CAA74725.1); contains InterPro domain Proteasome subunit, A-type (InterPro:IPR000426); contains InterPro domain Multispecific proteasome protease (InterPro:IPR001353)   chr3:19041974-19044043 FORWARD   Aliases: 20S PROTEASOME ALPHA SUBUNIT PAD1, F24M12.300                                                                                                                                                                                                                                                                                                                                                                                                                                                                                              | 9.2 | 6.2  | 3.0  | 4.4  |
| 20285 AT1G12910.1   Symbol: AN11   flower pigmentation protein (AN11), contains 3 WD-40 repeats (PF00400); identical to GB:AAC18912 from (Arabidopsis thaliana) (Genes Dev. 11 (11), 1422-1434 (1997))   chr1:4394899-4396289 REVERSE   Aliases: ATAN11, F13K23.16, F13K23_16                                                                                                                                                                                                                                                                                                                                                                                                                                                                                                                                                                                                                                                                                                                                                                                               | 9.2 | 9.1  | 0.1  | 0.2  |



|                                                                                                                                                                                                                                                                                                                                                                                                                                                |     |      |      |      |
|------------------------------------------------------------------------------------------------------------------------------------------------------------------------------------------------------------------------------------------------------------------------------------------------------------------------------------------------------------------------------------------------------------------------------------------------|-----|------|------|------|
| 5609 AT5G40770.1   Symbol: ATPHB3                                                                                                                                                                                                                                                                                                                                                                                                              | 9.2 | 7.4  | 1.8  | 4.2  |
| 11320 AT5G66530.1   aldose 1-epimerase family protein, similar to apospory-associated protein C; APOC (Chlamydomonas reinhardtii) GI:6970044; contains Pfam profile PF01263: Aldose 1-epimerase   chr5:26570973-26572902 REVERSE   Aliases: K1F13.19, K1F13_19                                                                                                                                                                                 | 9.2 | 9.8  | -0.6 | -2.0 |
| 16828 AT2G41630.1   Symbol: TFIIB   transcription initiation factor IIB-1 / general transcription factor TFIIB-1 (TFIIB1), identical to transcription initiation factor IIB-1 (TFIIB1) SP:P48512 from (Arabidopsis thaliana)   chr2:17362410-17364676 REVERSE   Aliases: T32G6.15, T32G6_15, TRANSCRIPTION FACTOR II B, TRANSCRIPTION FACTOR TFIIB                                                                                             | 9.2 | 9.5  | -0.3 | -0.8 |
| 5941 AT2G47450.1   Symbol: CAO   chloroplast signal recognition particle component (CAO), nearly identical to CAO (Arabidopsis thaliana) GI:4102582   chr2:19479751-19481384 FORWARD   Aliases: CHAOS, CHLOROPHYLL A/B BINDING PROTEIN HARVESTING ORGANELLE SPECIFIC, CPSRP43, T30B22.25                                                                                                                                                       | 9.2 | 7.7  | 1.4  | 4.1  |
| 1932 AT4G19880.3   similar to expressed protein [Arabidopsis thaliana] (TAIR:At5g45020.1); similar to putative transferase [Escherichia coli O157:H7 EDL933] (GB:AAG58235.1)   chr4:10784401-10786433 REVERSE   Aliases: T16H5.240, T16H5_240                                                                                                                                                                                                  | 9.1 | 10.4 | -1.2 | -7.5 |
| 5645 AT4G30480.3   expressed protein   chr4:14897352-14899127 FORWARD   Aliases: F17I23.180, F17I23_180                                                                                                                                                                                                                                                                                                                                        | 9.1 | 7.3  | 1.9  | 4.2  |
| 1556 AT4G04640.1   Symbol: ATPC1   ATP synthase gamma chain 1, chloroplast (ATPC1), identical to SP:Q01908 ATP synthase gamma chain 1, chloroplast precursor (EC 3.6.3.14) {Arabidopsis thaliana}   chr4:2350496-2352016 REVERSE   Aliases: T19J18.4, T19J18_4                                                                                                                                                                                 | 9.1 | 6.2  | 2.9  | 8.1  |
| 7400 AT1G16170.1   expressed protein   chr1:5538731-5539790 REVERSE   Aliases: T24D18.25, T24D18_25                                                                                                                                                                                                                                                                                                                                            | 9.1 | 9.6  | -0.5 | -3.4 |
| 893 AT5G17310.2   UTP--glucose-1-phosphate uridylyltransferase, putative / UDP-glucose pyrophosphorylase, putative / UGPase, putative, strong similarity to SP:P19595 UTP--glucose-1-phosphate uridylyltransferase (EC 2.7.7.9) (UDP-glucose pyrophosphorylase) (UDPGP) (UGPase) {Solanum tuberosum}; contains Pfam profile PF01704: UTP--glucose-1-phosphate uridylyltransferase   chr5:5696649-5700924 REVERSE   Aliases: MKP11.26, MKP11_26 | 9.1 | 4.3  | 4.9  | 9.9  |
| 2119 AT3G06680.1   60S ribosomal protein L29 (RPL29B), similar to 60S ribosomal protein L29 GB:P25886 from (Rattus norvegicus)   chr3:2114408-2114885 REVERSE   Aliases: T8E24.9                                                                                                                                                                                                                                                               | 9.1 | 5.4  | 3.7  | 7.2  |
| 15338 AT5G23610.2   similar to meiosis protein-related (DYAD) (SWI1) [Arabidopsis thaliana] (TAIR:At5g51330.1); similar to expressed protein (with alternative splicing) [Oryza sativa (japonica cultivar-group)] (GB:XP_469018.1)   chr5:7957343-7959354 REVERSE   Aliases: MQM1.12, MQM1_12                                                                                                                                                  | 9.1 | 9.4  | -0.2 | -1.1 |
| 2167 AT3G03920.1   Gar1 RNA-binding region family protein, contains Pfam profile PF04410: Gar1 protein RNA binding region   chr3:1009005-1010477 REVERSE   Aliases: F20H23.3, F20H23_3                                                                                                                                                                                                                                                         | 9.1 | 6.5  | 2.6  | 7.2  |
| 6496 AT1G27970.1   nuclear transport factor 2 (NTF2), putative, similar to Swiss-Prot:P33331 nuclear transport factor 2 (NTF-2) (Nuclear transport factor P10) (Saccharomyces cerevisiae)   chr1:9746798-9748006 FORWARD   Aliases: F13K9.26, F13K9_26                                                                                                                                                                                         | 9.1 | 6.2  | 2.9  | 3.8  |
| 10576 AT3G49860.1   Symbol: ATARLA1B   ADP-ribosylation factor, putative, similar to GTP-binding ADP-ribosylation factor homolog 1 protein (SP:P25160) (Drosophila melanogaster) and various ADP-RIBOSYLATION FACTOR (ARF) - like proteins; contains PF00025: ADP-ribosylation factor family domain                                                                                                                                            | 9.1 | 8.8  | 0.4  | 2.2  |
| 1008 AT5G28750.1   thylakoid assembly protein, putative, similar to thylakoid assembly 4 (tha4) protein (Pisum sativum) GI:4929305; contains Pfam profile PF02416: mttA/Hcf106 family   chr5:10784003-10785723 REVERSE   Aliases: T32B20.2, T32B20_2                                                                                                                                                                                           | 9.1 | 6.6  | 2.5  | 9.5  |
| 8830 AT3G05530.1   Symbol: RPT5A   26S proteasome AAA-ATPase subunit (RPT5a), identical to GB:AAF22525 GI:6652886 from (Arabidopsis thaliana)   chr3:1603438-1606237 FORWARD   Aliases: 19S PROTEASOME REGULATORY COMPLEX SUBUNIT S6A, 26S PROTEASOME AAA ATPASE SUBUNIT, ATS6A.2, F22F7.1, F22F7_1                                                                                                                                            | 9.1 | 7.9  | 1.2  | 2.8  |
| 1103 AT5G65360.1   histone H3, identical to histone H3 from Zea mays SP:P05203, Medicago sativa GI:166384, Encephalartos altensteinii SP:P08903, Pisum sativum SP:P02300; contains Pfam profile PF00125 Core histone H2A/H2B/H3/H4   chr5:26137085-26137807 REVERSE   Aliases: MNA5.9                                                                                                                                                          | 9.1 | 6.3  | 2.9  | 9.2  |
| 554 AT1G64880.1   ribosomal protein S5 family protein, contains similarity to 30S ribosomal protein S5 GI:6969105 from (Campylobacter jejuni)   chr1:24109305-24112809 FORWARD   Aliases: F13O11.18, F13O11_18                                                                                                                                                                                                                                 | 9.1 | 5.0  | 4.1  | 11.6 |
| 1469 AT3G56360.1   expressed protein, unknown protein 110K5.12 - Sorghum bicolor, TREMBL:AF124045_5                                                                                                                                                                                                                                                                                                                                            | 9.1 | 11.4 | -2.2 | -8.3 |
| 140 AT3G52180.2   similar to protein phosphatase-related [Arabidopsis thaliana] (TAIR:At3g10940.1); similar to unknown protein [Oryza sativa (japonica cultivar-group)] (GB:XP_482104.1); contains InterPro domain Tyrosine specific protein phosphatase and dual specificity protein phosphatase (InterPro:IPR000387); contains InterPro domain Dual specificity protein phosphatase (InterPro:IPR000340)                                     | 9.1 | 4.2  | 4.9  | 18.5 |
| 9351 AT2G46170.1   reticulon family protein (RTNLB5), weak similarity to Nogo-C protein (Rattus norvegicus) GI:6822251; contains Pfam profile PF02453: Reticulon   chr2:18972386-18974259 FORWARD   Aliases: T3F17.18                                                                                                                                                                                                                          | 9.1 | 7.2  | 2.0  | 2.6  |

|                                                                                                                                                                                                                                                                                                                                                                                                                                                                                                              |     |      |      |       |
|--------------------------------------------------------------------------------------------------------------------------------------------------------------------------------------------------------------------------------------------------------------------------------------------------------------------------------------------------------------------------------------------------------------------------------------------------------------------------------------------------------------|-----|------|------|-------|
| 11706 ATCG00780.1   Symbol: RPL14   encodes a chloroplast ribosomal protein L14, a constituent of the large subunit of the ribosomal complex   chrC:80696-81064 REVERSE   Aliases: RPL14                                                                                                                                                                                                                                                                                                                     | 9.1 | 7.8  | 1.4  | 1.9   |
| 143 AT5G50400.1   calcineurin-like phosphoesterase family protein, contains Pfam profile: PF00149 calcineurin-like phosphoesterase                                                                                                                                                                                                                                                                                                                                                                           | 9.1 | 12.0 | -2.9 | -18.5 |
| 20114 AT2G44080.1   expressed protein   chr2:18244261-18245249 FORWARD   Aliases: F6E13.21                                                                                                                                                                                                                                                                                                                                                                                                                   | 9.1 | 9.2  | -0.0 | -0.2  |
| 15770 AT3G62190.1   DNAJ heat shock N-terminal domain-containing protein, similar to SP:P39101 CAJ1 protein Saccharomyces cerevisiae; contains Pfam profile PF00226 DnaJ domain   chr3:23032096-23034307 FORWARD   Aliases: T17J13.150                                                                                                                                                                                                                                                                       | 9.1 | 9.3  | -0.2 | -1.0  |
| 5359 AT4G16830.1   nuclear RNA-binding protein (RGGA), identical to nuclear RNA binding protein GI:6492264 from (Arabidopsis thaliana)   chr4:9470458-9472613 FORWARD   Aliases: DL4440W, FCAALL.13                                                                                                                                                                                                                                                                                                          | 9.1 | 10.4 | -1.3 | -4.4  |
| 9681 AT1G11240.1   expressed protein   chr1:3766754-3768294 REVERSE   Aliases: T28P6.24, T28P6_24                                                                                                                                                                                                                                                                                                                                                                                                            | 9.1 | 7.8  | 1.3  | 2.5   |
| 326 AT3G25920.1   Symbol: RPL15   50S ribosomal protein L15, chloroplast (CL15), identical to GB:P25873 from (Arabidopsis thaliana)   chr3:9491321-9493855 REVERSE   Aliases: MPE11.32, RIBOSOMAL PROTEIN CL15                                                                                                                                                                                                                                                                                               | 9.1 | 5.2  | 3.9  | 13.9  |
| 5604 AT3G62450.1   expressed protein   chr3:23109120-23109606 FORWARD   Aliases: T12C14.150                                                                                                                                                                                                                                                                                                                                                                                                                  | 9.1 | 8.3  | 0.8  | 4.2   |
| 15125 AT5G17050.1   UDP-glucuronosyl/UDP-glucosyl transferase family protein, similar to UDP glucose:flavonoid 3-o-glucosyltransferase, Vitis vinifera, EMBL:AF000372   chr5:5607791-5609495 REVERSE   Aliases: F2K13.200, F2K13_200                                                                                                                                                                                                                                                                         | 9.1 | 8.5  | 0.6  | 1.1   |
| 444 AT1G08780.1   prefoldin, putative, similar to Swiss-Prot:Q9NQP4 prefoldin subunit 4 (Protein C-1) (Homo sapiens)   chr1:2809783-2811194 REVERSE   Aliases: F22O13.27, F22O13_27                                                                                                                                                                                                                                                                                                                          | 9.1 | 5.8  | 3.3  | 12.5  |
| 12898 AT2G22480.1   phosphofructokinase family protein, similar to phosphofructokinase (Amycolatopsis methanolica) GI:17432243; contains Pfam profile PF00365: Phosphofructokinase   chr2:9552656-9555643 FORWARD   Aliases: F14M13.12, F14M13_12                                                                                                                                                                                                                                                            | 9.1 | 9.7  | -0.6 | -1.6  |
| 18838 AT2G27600.1   AAA-type ATPase family protein / vacuolar sorting protein-related, similar to SP:P46467 SKD1 protein (Vacuolar sorting protein 4b) {Mus musculus}; contains Pfam profiles PF00004: ATPase AAA family, PF04212: MIT domain   chr2:11788115-11791008 FORWARD   Aliases: F10A12.27, F10A12_27                                                                                                                                                                                               | 9.1 | 8.8  | 0.3  | 0.4   |
| 6375 AT2G31350.2   hydroxyacylglutathione hydrolase, putative / glyoxalase II, putative, similar to glyoxalase II isozyme (Arabidopsis thaliana) gi:2570338:gb:AAC49865   chr2:13375370-13378070 FORWARD   Aliases: T28P16.16, T28P16_16                                                                                                                                                                                                                                                                     | 9.1 | 10.0 | -0.9 | -3.8  |
| 99 AT5G01300.1   phosphatidylethanolamine-binding family protein, similar to cold-regulated protein (Hordeum vulgare subsp. vulgare) GI:10799810; contains Pfam profile PF01161: Phosphatidylethanolamine-binding protein                                                                                                                                                                                                                                                                                    | 9.1 | 2.5  | 6.6  | 20.9  |
| 9372 AT1G04690.1   Symbol: KAB1   potassium channel protein, putative, nearly identical to K+ channel protein (Arabidopsis thaliana) GI:1063415; contains Pfam profile PF00248: oxidoreductase, aldo/keto reductase family                                                                                                                                                                                                                                                                                   | 9.1 | 8.0  | 1.1  | 2.6   |
| 3717 AT1G48300.1   expressed protein   chr1:17851024-17852466 FORWARD   Aliases: F11A17.15, F11A17_15                                                                                                                                                                                                                                                                                                                                                                                                        | 9.1 | 11.7 | -2.6 | -5.5  |
| 18892 AT3G23280.2   zinc finger (C3HC4-type RING finger) family protein / ankyrin repeat family protein, contains Pfam profile: PF00097 zinc finger, C3HC4 type (RING finger) and Pfam profile: PF00023 ankyrin repeat   chr3:8321371-8324435 FORWARD   Aliases: K14B15.19                                                                                                                                                                                                                                   | 9.1 | 9.3  | -0.2 | -0.4  |
| 134 AT2G42570.1   expressed protein   chr2:17724453-17727158 REVERSE   Aliases: F14N22.16, F14N22_16                                                                                                                                                                                                                                                                                                                                                                                                         | 9.1 | 5.2  | 3.9  | 18.6  |
| 4841 AT5G07090.2   similar to 40S ribosomal protein S4 (RPS4D) [Arabidopsis thaliana] (TAIR:At5g58420.1); similar to ribosomal protein S4 [Solanum tuberosum] (GB:CAA54095.1); contains InterPro domain RNA-binding S4 (InterPro:IPR002942); contains InterPro domain KOW (Kyrpides, Ouzounis, Woese) motif (InterPro:IPR006646); contains InterPro domain Ribosomal protein S4E (InterPro:IPR000876); contains InterPro domain KOW (InterPro:IPR005824)   chr5:2202398-2204079 FORWARD   Aliases: T28J14.30 | 9.1 | 7.0  | 2.1  | 4.7   |
| 16078 AT3G60340.2   palmitoyl protein thioesterase family protein, palmitoyl-protein thioesterase precursor, Mus musculus, EMBL:AF071025   chr3:22315148-22317899 FORWARD   Aliases: T8B10.2                                                                                                                                                                                                                                                                                                                 | 9.1 | 8.8  | 0.4  | 1.0   |
| 3097 AT5G03660.1   expressed protein, low similarity to outer surface protein F (Borrelia burgdorferi) GI:466482; contains Pfam profile PF04949: Family of unknown function (DUF662)   chr5:937976-940057 FORWARD   Aliases: F17C15.80, F17C15_80                                                                                                                                                                                                                                                            | 9.1 | 6.5  | 2.6  | 6.0   |
| 315 AT1G13640.1   phosphatidylinositol 3- and 4-kinase family protein, low similarity to phosphatidylinositol 4-kinase type-II beta (Homo sapiens) GI:20159767; contains Pfam profile PF00454: Phosphatidylinositol 3- and 4-kinase   chr1:4677024-4679801 REVERSE   Aliases: F21F23.8, F21F23_8                                                                                                                                                                                                             | 9.1 | 5.4  | 3.6  | 14.0  |

|                                                                                                                                                                                                                                                                                                                                                                                                                                                                                                                                                                |     |      |      |      |
|----------------------------------------------------------------------------------------------------------------------------------------------------------------------------------------------------------------------------------------------------------------------------------------------------------------------------------------------------------------------------------------------------------------------------------------------------------------------------------------------------------------------------------------------------------------|-----|------|------|------|
| 2298 AT2G37250.1   Symbol: ADK/ATPADK1   adenylate kinase family protein, contains Pfam profile: PF00406 adenylate kinase   chr2:15649016-15650797 FORWARD   Aliases: ADK, ATPADK1, F3G5.4, F3G5_4                                                                                                                                                                                                                                                                                                                                                             | 9.1 | 7.4  | 1.7  | 7.0  |
| 13124 AT1G32790.2   Symbol: CID11   similar to RNA-binding protein, putative [Arabidopsis thaliana] (TAIR:At4g10610.1); similar to putative RNA-binding protein RBP37 [Oryza sativa (japonica cultivar-group)] (GB:XP_479783.1); contains InterPro domain RNA-binding region RNP-1 (RNA recognition motif) (InterPro:IPR000504)   chr1:11874684-11877367 REVERSE   Aliases: CID11, F6N18.17, F6N18_17                                                                                                                                                          | 9.1 | 9.9  | -0.8 | -1.6 |
| 6895 AT1G33700.2   similar to expressed protein [Arabidopsis thaliana] (TAIR:At5g49900.1); similar to expressed protein [Arabidopsis thaliana] (TAIR:At4g10060.1); similar to expressed protein [Arabidopsis thaliana] (TAIR:At3g24180.1); similar to unknown protein [Oryza sativa (japonica cultivar-group)] (GB:AAP54244.1); similar to At5g49900 [Oryza sativa (japonica cultivar-group)] (GB:AAX95400.1); contains InterPro domain Protein of unknown function DUF608 (InterPro:IPR006775)   chr1:12207208-12214162 REVERSE   Aliases: F14M2.16, F14M2_16 | 9.1 | 9.6  | -0.5 | -3.6 |
| 15410 AT1G17080.1   expressed protein   chr1:5839679-5841559 REVERSE   Aliases: F20D23.22, F20D23_22                                                                                                                                                                                                                                                                                                                                                                                                                                                           | 9.1 | 9.5  | -0.4 | -1.1 |
| 3173 AT3G51100.2   expressed protein   chr3:18991762-18993241 REVERSE   Aliases: F24M12.140                                                                                                                                                                                                                                                                                                                                                                                                                                                                    | 9.1 | 7.5  | 1.6  | 5.9  |
| 6997 AT4G24990.1   Symbol: ATGP4   ubiquitin family protein, contains INTERPRO:IPR000626 ubiquitin domain   chr4:12849719-12851643 REVERSE   Aliases: F13M23.130, F13M23_130                                                                                                                                                                                                                                                                                                                                                                                   | 9.1 | 10.1 | -1.0 | -3.5 |
| 4123 AT4G08685.1   Symbol: SAH7   pollen Ole e 1 allergen and extensin family protein, contains Pfam domain, PF01190: Pollen proteins Ole e I family   chr4:5550426-5551816 FORWARD   Aliases: None                                                                                                                                                                                                                                                                                                                                                            | 9.1 | 6.1  | 2.9  | 5.2  |
| 10477 AT2G45990.4   expressed protein, similar to unknown protein [Oryza sativa (japonica cultivar-group)] (GB:XP_477679.1)   chr2:18926436-18928302 FORWARD   Aliases: F4I18.49                                                                                                                                                                                                                                                                                                                                                                               | 9.1 | 8.3  | 0.8  | 2.2  |
| 14293 AT3G12630.1   zinc finger (AN1-like) family protein, contains Pfam domain, PF01428: AN1-like Zinc finger   chr3:4012615-4013590 FORWARD   Aliases: T2E22.6                                                                                                                                                                                                                                                                                                                                                                                               | 9.1 | 9.5  | -0.4 | -1.3 |
| 3977 AT1G07170.1   expressed protein, contains Pfam domain PF03660: Uncharacterised protein family (UPF0123)   chr1:2200133-2201139 FORWARD   Aliases: F10K1.35                                                                                                                                                                                                                                                                                                                                                                                                | 9.1 | 8.1  | 1.0  | 5.3  |
| 17494 AT5G54960.1   Symbol: PDC2   pyruvate decarboxylase, putative, strong similarity to pyruvate decarboxylase 1 (Vitis vinifera) GI:10732644; contains InterPro entry IPR000399: Pyruvate decarboxylase   chr5:22327913-22329987 REVERSE   Aliases: MBG8.23, MBG8_23, PYRUVATE DECARBOXYLASE, PYRUVATE DECARBOXYLASE 2                                                                                                                                                                                                                                      | 9.1 | 9.4  | -0.3 | -0.7 |
| 7770 ATCG00570.1   Symbol: PSBF   PSII cytochrome b559   chrC:63942-64061 REVERSE   Aliases: PSBF                                                                                                                                                                                                                                                                                                                                                                                                                                                              | 9.1 | 7.3  | 1.8  | 3.2  |
| 2509 AT2G32480.2   membrane-associated zinc metalloprotease, putative, similar to Hypothetical zinc metalloprotease AII3971 (SP:Q8YQ64) (strain PCC 7120) {Anabaena sp.} Pfam PF00595: PDZ domain (Also known as DHR or GLGF); contains TIGRFAM TIGR00054: membrane-associated zinc metalloprotease, putative   chr2:13795594-13797150 REVERSE   Aliases: T26B15.4, T26B15_4                                                                                                                                                                                   | 9.1 | 7.6  | 1.5  | 6.7  |
| 12155 AT4G35220.1   cyclase family protein, contains Pfam profile: PF04199 putative cyclase   chr4:16752618-16754310 FORWARD   Aliases: F23E12.220, F23E12_220                                                                                                                                                                                                                                                                                                                                                                                                 | 9.1 | 8.3  | 0.8  | 1.8  |
| 8672 AT1G32400.3   Symbol: TOM2A   similar to expressed protein [Arabidopsis thaliana] (TAIR:At2g20230.1); similar to senescence-associated protein-like [Oryza sativa (japonica cultivar-group)] (GB:XP_480197.1); contains InterPro domain CD9/CD37/CD63 antigen (InterPro:IPR000301)   chr1:11689088-11691445 REVERSE   Aliases: F5D14.17, F5D14_17, TOBAMOVIRUS MULTIPLICATION 2A                                                                                                                                                                          | 9.1 | 10.2 | -1.1 | -2.8 |
| 20773 AT1G72820.1   mitochondrial substrate carrier family protein, contains Pfam profile: PF00153 mitochondrial carrier protein   chr1:27406540-27408335 FORWARD   Aliases: F3N23.2, F3N23_2                                                                                                                                                                                                                                                                                                                                                                  | 9.1 | 9.1  | -0.0 | -0.1 |
| 14648 AT3G27240.1   cytochrome c1, putative, cytochrome c1, heme protein, mitochondrial precursor (Clone PC13III) (Solanum tuberosum) SWISS-PROT:P25076   chr3:10057026-10059953 REVERSE   Aliases: K17E12.6                                                                                                                                                                                                                                                                                                                                                   | 9.1 | 8.0  | 1.1  | 1.2  |
| 2160 AT5G57300.1   UbiE/COQ5 methyltransferase family protein, similar to ubiquinone biosynthesis methyltransferase COQ5 (Saccharomyces cerevisiae)(SP:P49017), ubiquinone/menaquinone biosynthesis methyltransferase ubiE (Escherichia coli)(SP:P27851); contains Pfam profile PF01209: methyltransferase, UbiE/COQ5 family   chr5:23225809-23228316 REVERSE   Aliases: MJB24.11, MJB24_11                                                                                                                                                                    | 9.1 | 6.6  | 2.5  | 7.2  |
| 2995 AT4G30810.1   Symbol: SCPL29                                                                                                                                                                                                                                                                                                                                                                                                                                                                                                                              | 9.1 | 7.1  | 1.9  | 6.1  |
| 3225 AT2G37190.1   60S ribosomal protein L12 (RPL12A)   chr2:15626486-15627198 REVERSE   Aliases: T2N18.5, T2N18_5                                                                                                                                                                                                                                                                                                                                                                                                                                             | 9.1 | 6.9  | 2.2  | 5.9  |



|                                                                                                                                                                                                                                                                                                                                                                                                                             |     |      |      |      |
|-----------------------------------------------------------------------------------------------------------------------------------------------------------------------------------------------------------------------------------------------------------------------------------------------------------------------------------------------------------------------------------------------------------------------------|-----|------|------|------|
| 1080 AT2G36830.1   Symbol: GAMMA TIP   major intrinsic family protein / MIP family protein, contains Pfam profile: MIP PF00230   chr2:15452505-15453653 FORWARD   Aliases: GAMMA TIP1, GAMMA TONOPLAST INTRINSIC PROTEIN, T1J8.1, T1J8_1, TIP1;1                                                                                                                                                                            | 9.1 | 12.6 | -3.6 | -9.3 |
| 5943 AT1G17160.1   pfkB-type carbohydrate kinase family protein, contains Pfam profile: PF00294 pfkB family carbohydrate kinase   chr1:5867639-5869323 FORWARD   Aliases: F20D23.14, F20D23_14                                                                                                                                                                                                                              | 9.1 | 8.0  | 1.1  | 4.1  |
| 6200 AT2G27970.1   Symbol: CKS2   cyclin-dependent kinase, putative / CDK, putative, similar to Cks1 protein (Arabidopsis thaliana) gi:2274859:emb:CAA03859   chr2:11919295-11920348 REVERSE   Aliases: CDK subunit 2, CKS2, T1E2.11, T1E2_11                                                                                                                                                                               | 9.1 | 7.4  | 1.6  | 3.9  |
| 678 AT5G45750.1   Ras-related GTP-binding protein, putative, similar to GTP-binding protein GI:303744 from (Pisum sativum)                                                                                                                                                                                                                                                                                                  | 9.1 | 5.3  | 3.8  | 10.8 |
| 1618 AT4G30660.1   hydrophobic protein, putative / low temperature and salt responsive protein, putative, similar to SP:Q9ZQN7 Hydrophobic protein RC12A (Low temperature and salt responsive protein LTI6A) {Arabidopsis thaliana}; contains Pfam profile PF01679: Uncharacterized protein family   chr4:14955453-14956069 FORWARD   Aliases: T10C21.10, T10C21_10                                                         | 9.1 | 7.1  | 1.9  | 8.0  |
| 489 AT1G80820.1   Symbol: CCR2   cinnamoyl-CoA reductase, putative, identical to CCR2 (GI:12407990), similar to cinnamoyl CoA reductase from Eucalyptus gunnii (GI:2058311)   chr1:30375465-30377562 FORWARD   Aliases: CINNAMOYL COA REDUCTASE, F23A5.17, F23A5_17                                                                                                                                                         | 9.1 | 3.4  | 5.7  | 12.1 |
| 11170 AT5G42270.1   Symbol: VAR1   FtsH protease, putative, similar to FtsH protease GI:13183728 from (Medicago sativa)   chr5:16919714-16923100 FORWARD   Aliases: FTSH5, K5J14.13, K5J14_13, VARIEGATED 1                                                                                                                                                                                                                 | 9.1 | 8.3  | 0.8  | 2.0  |
| 19302 AT3G22850.1   expressed protein, similar to auxin down-regulated protein ARG10 (Vigna radiata) GI:2970051, wali7 (aluminum-induced protein) (Triticum aestivum) GI:451193   chr3:8089010-8090462 FORWARD   Aliases: F5N5.2                                                                                                                                                                                            | 9.1 | 8.9  | 0.2  | 0.3  |
| 1657 AT5G63670.1   transcription initiation protein-related, contains weak similarity to Transcription initiation protein SPT4 homolog 1 (Swiss-Prot:Q16550) (Mus musculus)                                                                                                                                                                                                                                                 | 9.1 | 6.6  | 2.5  | 7.9  |
| 10262 AT2G16600.1   Symbol: ROC3   peptidyl-prolyl cis-trans isomerase, cytosolic / cyclophilin / rotamase (ROC3), identical to cytosolic cyclophilin (Arabidopsis thaliana) GI:1305455   chr2:7207889-7208650 FORWARD   Aliases: CYCLOPHILIN, T24I21.1, T24I21_1                                                                                                                                                           | 9.1 | 7.4  | 1.7  | 2.3  |
| 4367 AT1G50920.1   GTP-binding protein-related, similar to GTP-binding protein SP:Q99ME9 from (Mus musculus)   chr1:18873807-18876598 FORWARD   Aliases: F8A12.14, F8A12_14                                                                                                                                                                                                                                                 | 9.1 | 6.3  | 2.7  | 5.0  |
| 2963 AT3G62420.1   bZIP transcription factor family protein, similar to common plant regulatory factor 6 GI:9650826 from (Petroselinum crispum)   chr3:23102820-23103260 REVERSE   Aliases: T12C14.120                                                                                                                                                                                                                      | 9.1 | 10.2 | -1.2 | -6.2 |
| 17560 AT3G11230.1   yippee family protein, similar to qdgl-1 (Coturnix coturnix) GI:10441650, Yippee protein (Homo sapiens) GI:5713281; contains Pfam profile PF03226: Yippee putative zinc-binding protein   chr3:3516583-3518377 FORWARD   Aliases: F11B9.15                                                                                                                                                              | 9.1 | 9.2  | -0.1 | -0.7 |
| 18847 AT5G22060.1   Symbol: ATJ2   DNAJ heat shock protein, putative, strong similarity to SP:O60884 DnaJ homolog subfamily A member 2 (Dnj3) Homo sapiens, several plant DnaJ proteins from PGR; contains Pfam profiles PF00226 DnaJ domain, PF00684 DnaJ central domain (4 repeats), PF01556 DnaJ C terminal region   chr5:7303625-7305800 REVERSE   Aliases: None                                                        | 9.1 | 9.3  | -0.2 | -0.4 |
| 6540 AT5G66440.1   expressed protein   chr5:26547461-26548323 REVERSE   Aliases: K1F13.9, K1F13_9                                                                                                                                                                                                                                                                                                                           | 9.1 | 7.5  | 1.6  | 3.7  |
| 8003 AT5G20280.1   sucrose-phosphate synthase, putative, similar to sucrose-phosphate synthase (EC 2.4.1.14) isoform 1 - Citrus unshiu, EMBL:AB005023   chr5:6844716-6850065 REVERSE   Aliases: F5O24.170, F5O24_170                                                                                                                                                                                                        | 9.1 | 6.7  | 2.4  | 3.1  |
| 9952 AT3G62120.2   tRNA synthetase class II (G, H, P and S) family protein, similar to SP:P07814 Bifunctional aminoacyl-tRNA synthetase (Includes: Glutamyl-tRNA synthetase (EC 6.1.1.17) (Glutamate--tRNA ligase); Prolyl-tRNA synthetase (EC 6.1.1.15) (Proline--tRNA ligase)) {Homo sapiens}; contains Pfam profiles PF00587: tRNA synthetase class II core domain (G, H, P, S and T), PF03129: Anticodon binding domain | 9.1 | 7.8  | 1.3  | 2.4  |
| 10350 AT5G50950.2   fumarate hydratase, putative / fumarase, putative, similar to SP:P55250 Fumarate hydratase, mitochondrial precursor (EC 4.2.1.2) (Fumarase) {Rhizopus oryzae}; contains Pfam profile PF00206: Lyase   chr5:20746870-20751152 FORWARD   Aliases: K3K7.11, K3K7_11                                                                                                                                        | 9.1 | 8.1  | 1.0  | 2.3  |
| 10349 AT2G47510.1   Symbol: FUM1   fumarate hydratase, putative / fumarase, putative, similar to SP:P55250 Fumarate hydratase, mitochondrial precursor (EC 4.2.1.2) (Fumarase) {Rhizopus oryzae}; contains Pfam profile PF00206: Lyase   chr2:19505458-19509316 FORWARD   Aliases: FUMARASE 1, T30B22.19                                                                                                                    | 9.1 | 8.1  | 1.0  | 2.3  |
| 7463 AT1G18080.1   Symbol: ATARCA                                                                                                                                                                                                                                                                                                                                                                                           | 9.1 | 5.8  | 3.3  | 3.3  |
| 11434 AT3G19490.1   Symbol: ATNHD1                                                                                                                                                                                                                                                                                                                                                                                          | 9.1 | 8.6  | 0.5  | 2.0  |

|                   |                                                                                                                                                                                                                                                                                                                                                                                                                                                                                                                                                                                                             |     |      |      |      |
|-------------------|-------------------------------------------------------------------------------------------------------------------------------------------------------------------------------------------------------------------------------------------------------------------------------------------------------------------------------------------------------------------------------------------------------------------------------------------------------------------------------------------------------------------------------------------------------------------------------------------------------------|-----|------|------|------|
| 632 AT4G05180.1   | oxygen-evolving enhancer protein 3, chloroplast, putative (PSBQ2), identical to SP:Q41932 Oxygen-evolving enhancer protein 3-2, chloroplast precursor (OEE3) (16 kDa subunit of oxygen evolving system of photosystem II) (OEC 16 kDa subunit) {Arabidopsis thaliana}; similar to SP:P12301 Oxygen-evolving enhancer protein 3, chloroplast precursor (OEE3) (16 kDa subunit of oxygen evolving system of photosystem II) (OEC 16 kDa subunit) {Spinacia oleracea}; contains Pfam profile PF05757: Oxygen evolving enhancer protein 3 (PsbQ)   chr4:2671820-2673241 REVERSE   Aliases: C17L7.100, C17L7_100 | 9.1 | 3.5  | 5.5  | 11.1 |
| 4632 AT3G54010.2  | Symbol: PAS1   peptidyl-prolyl cis-trans isomerase, putative / FK506-binding protein, putative / pasticino 1-D (PAS1-D), nearly identical to pasticino 1-D (Arabidopsis thaliana) GI:3080740   chr3:20011867-20016161 FORWARD   Aliases: F5K20.310, PASTICCINO 1                                                                                                                                                                                                                                                                                                                                            | 9.1 | 10.2 | -1.1 | -4.8 |
| 16268 AT1G50250.1 | Symbol: FTSH1   encodes an FTSH protease that is localized to the chloroplast   chr1:18617877-18620731 REVERSE   Aliases: F14I3.14, F14I3_14, FTSH1                                                                                                                                                                                                                                                                                                                                                                                                                                                         | 9.1 | 8.8  | 0.2  | 0.9  |
| 1612 AT4G08390.2  | L-ascorbate peroxidase, stromal (sAPX), identical to stromal ascorbate peroxidase (Arabidopsis thaliana) gi:1419388:emb:CAA67425                                                                                                                                                                                                                                                                                                                                                                                                                                                                            | 9.1 | 5.8  | 3.2  | 8.0  |
| 3562 AT3G56240.1  | Symbol: CCH   copper homeostasis factor / copper chaperone (CCH) (ATX1), identical to gi:3168840 Pfam profile PF00403: Heavy-metal-associated domain   chr3:20874236-20875470 REVERSE   Aliases: ATX1, COPPER CHAPERONE, COPPER HOMEOSTASIS FACTOR, F18O21.200                                                                                                                                                                                                                                                                                                                                              | 9.1 | 10.7 | -1.6 | -5.6 |
| 1247 AT1G19130.1  | expressed protein   chr1:6609360-6610593 REVERSE   Aliases: F14D16.29, F14D16_29                                                                                                                                                                                                                                                                                                                                                                                                                                                                                                                            | 9.1 | 6.8  | 2.3  | 8.8  |
| 6350 AT1G30380.1  | photosystem I reaction center subunit psaK, chloroplast, putative / photosystem I subunit X, putative / PSI-K, putative (PSAK), identical to SP:Q9SUI5; strong similarity to SP:P36886 Photosystem I reaction center subunit psaK, chloroplast precursor (Photosystem I subunit X) (PSI-K) (Light-harvesting complex I 7 kDa protein){Hordeum vulgare}; contains Pfam profile PF01241: Photosystem I psaG / psaK                                                                                                                                                                                            | 9.1 | 8.0  | 1.1  | 3.8  |
| 938 AT4G36910.1   | CBS domain-containing protein, contains Pfam profile PF00571: CBS domain                                                                                                                                                                                                                                                                                                                                                                                                                                                                                                                                    | 9.1 | 4.6  | 4.5  | 9.7  |
| 2890 AT3G62970.1  | similar to zinc finger (C3HC4-type RING finger) family protein [Arabidopsis thaliana] (TAIR:At5g18650.1); similar to putative PGPD14 protein (pollen germination related protein) [Oryza sativa (japonica cultivar-group)] (GB:NP_916676.1); similar to zinc finger protein ZFP-like [Oryza sativa (japonica cultivar-group)] (GB:BAD87761.1); contains InterPro domain CHY zinc finger (InterPro:IPR008913); contains InterPro domain Zn-finger, RING (InterPro:IPR001841)   chr3:23281609-23283895 FORWARD   Aliases: T20O10.70                                                                           | 9.1 | 6.3  | 2.7  | 6.3  |
| 5754 AT1G28680.1  | transferase family protein, similar to elicitor inducible gene product EIG-I24 (Nicotiana tabacum) (gi:10798748); contains Pfam transferase family domain PF00248   chr1:10078175-10080015 FORWARD   Aliases: F1K23.12, F1K23_12                                                                                                                                                                                                                                                                                                                                                                            | 9.1 | 10.3 | -1.3 | -4.2 |
| 1644 AT1G22140.2  | expressed protein   chr1:7814830-7815620 REVERSE   Aliases: F2E2.21, F2E2_21                                                                                                                                                                                                                                                                                                                                                                                                                                                                                                                                | 9.1 | 6.8  | 2.2  | 8.0  |
| 10631 AT3G04560.1 | expressed protein   chr3:1226624-1229414 REVERSE   Aliases: F7O18.3, F7O18_3                                                                                                                                                                                                                                                                                                                                                                                                                                                                                                                                | 9.1 | 8.7  | 0.4  | 2.2  |
| 1133 AT5G55640.1  | expressed protein   chr5:22550385-22551304 REVERSE   Aliases: MDF20.8, MDF20_8                                                                                                                                                                                                                                                                                                                                                                                                                                                                                                                              | 9.1 | 7.1  | 2.0  | 9.1  |
| 413 AT1G15250.1   | 60S ribosomal protein L37 (RPL37A), almost identical to GB:Q43292   chr1:5248660-5249457 REVERSE   Aliases: F9L1.46, F9L1_46                                                                                                                                                                                                                                                                                                                                                                                                                                                                                | 9.1 | 4.9  | 4.1  | 12.7 |
| 7759 AT3G49680.1  | branched-chain amino acid aminotransferase 3 / branched-chain amino acid transaminase 3 (BCAT3), identical to SP:Q9M401 Branched-chain amino acid aminotransferase 3, chloroplast precursor (EC 2.6.1.42) (Atbcat-3){Arabidopsis thaliana}   chr3:18433644-18436674 FORWARD   Aliases: T16K5.30                                                                                                                                                                                                                                                                                                             | 9.1 | 7.5  | 1.5  | 3.2  |
| 16358 AT4G17940.1 | expressed protein   chr4:9965754-9966978 FORWARD   Aliases: T6K21.120, T6K21_120                                                                                                                                                                                                                                                                                                                                                                                                                                                                                                                            | 9.1 | 8.7  | 0.3  | 0.9  |
| 19004 AT5G13190.1 | expressed protein   chr5:4204820-4206408 REVERSE   Aliases: T19L5.5                                                                                                                                                                                                                                                                                                                                                                                                                                                                                                                                         | 9.1 | 9.1  | -0.1 | -0.4 |
| 12632 AT2G34585.1 | expressed protein   chr2:14575126-14575716 REVERSE   Aliases: None                                                                                                                                                                                                                                                                                                                                                                                                                                                                                                                                          | 9.1 | 9.4  | -0.4 | -1.7 |
| 560 AT1G15390.1   | Symbol: PDF1A   peptide deformylase, mitochondrial / polypeptide deformylase 1A (PDF1A), nearly identical to SP:Q9FV53 Peptide deformylase, mitochondrial precursor (EC 3.5.1.88) (PDF) (Polypeptide deformylase) {Arabidopsis thaliana}; contains Pfam profile PF01327: polypeptide deformylase; supporting cDNA gi:11320951:gb:AF250959.1:AF250959   chr1:5294624-5295792 FORWARD   Aliases: PEPTIDE DEFORMYLASE 1A                                                                                                                                                                                       | 9.1 | 5.2  | 3.8  | 11.5 |
| 3816 AT5G13110.1  | Symbol: G6PD2   Encodes a plastidic glucose-6-phosphate dehydrogenase that is sensitive to reduction by DTT and whose mRNA is most highly expressed in root.   chr5:4158814-4161823 FORWARD   Aliases: G6PD2, GLUCOSE 6 PHOSPHATE DEHYDROGENASE 2, T19L5.70, T19L5_70                                                                                                                                                                                                                                                                                                                                       | 9.1 | 10.6 | -1.5 | -5.4 |
| 807 AT5G35700.1   | fimbrin-like protein, putative, similar to fimbrin-like protein (ATFIM1) (Arabidopsis thaliana) GI:2905893, fimbrin (Schizosaccharomyces pombe) GI:3057144; contains Pfam profile PF00307: Calponin homology (CH) domain                                                                                                                                                                                                                                                                                                                                                                                    | 9.1 | 5.4  | 3.7  | 10.2 |
| 534 AT5G06590.1   | expressed protein   chr5:2016646-2018836 FORWARD   Aliases: F15M7.12, F15M7_12                                                                                                                                                                                                                                                                                                                                                                                                                                                                                                                              | 9.1 | 4.7  | 4.4  | 11.7 |
| 8397 AT3G13772.1  | endomembrane protein 70, putative, TM4 family;   chr3:4521540-4524401 REVERSE   Aliases: MMM17.22                                                                                                                                                                                                                                                                                                                                                                                                                                                                                                           | 9.0 | 9.9  | -0.8 | -2.9 |

|                                                                                                                                                                                                                                                                                                                                                                                                                                                                                                                                                                                                                                                         |     |      |      |      |
|---------------------------------------------------------------------------------------------------------------------------------------------------------------------------------------------------------------------------------------------------------------------------------------------------------------------------------------------------------------------------------------------------------------------------------------------------------------------------------------------------------------------------------------------------------------------------------------------------------------------------------------------------------|-----|------|------|------|
| 9185 AT1G06400.1   Symbol: ARA2   Ras-related GTP-binding protein (ARA-2), identical to Ras-related protein ARA-2 SP:P28185 from (Arabidopsis thaliana)   chr1:1950843-1952726 REVERSE   Aliases: ARA 2, SMALL GTP BINDING PROTEIN, T2D23.10, T2D23_10                                                                                                                                                                                                                                                                                                                                                                                                  | 9.0 | 8.1  | 0.9  | 2.6  |
| 15804 AT2G27285.1   expressed protein, weak similarity to maeb1 (GI:20087019) (Plasmodium falciparum), chimeric erythrocyte-binding protein MAEBL (GI:22086284) (Plasmodium falciparum)   chr2:11683038-11685178 REVERSE   Aliases: None                                                                                                                                                                                                                                                                                                                                                                                                                | 9.0 | 8.6  | 0.4  | 1.0  |
| 14964 AT2G03150.1   Symbol: EMB1579   ATP/GTP-binding protein family, contains ATP/GTP-binding site motif A (P-loop), PROSITE:PS00017   chr2:951930-959162 FORWARD   Aliases: EMB1579, EMBRYO DEFECTIVE 1579, T18E12.18, T18E12_18                                                                                                                                                                                                                                                                                                                                                                                                                      | 9.0 | 8.4  | 0.6  | 1.2  |
| 3105 AT5G08560.1   transducin family protein / WD-40 repeat family protein, contains 7 WD-40 repeats (PF00400); similar to will die slowly protein (WDS) (SP:Q9V3J8) (Drosophila melanogaster)   chr5:2770875-2774673 REVERSE   Aliases: MAH20.12, MAH20_12                                                                                                                                                                                                                                                                                                                                                                                             | 9.0 | 10.1 | -1.1 | -6.0 |
| 202 AT4G09010.1   L-ascorbate peroxidase, chloroplast, putative, identical to SP:P82281:TL29_ARATH (EC 1.11.1.11) {Arabidopsis thaliana}; ascorbate peroxidase - Spinacia oleracea, (gi:1669585); contains Pfam domain PF00141: Peroxidase; contains TIGRfam domain TIGR01409: Tat (twin-arginine translocation) pathway signal sequence; identical to ascorbate peroxidase APX4 (AT4g09010) mRNA, partial cds GI:31980499   chr4:5777080-5779418 REVERSE   Aliases: F23J3.40, F23J3_40                                                                                                                                                                 | 9.0 | 3.9  | 5.2  | 16.6 |
| 14407 AT5G36880.2   similar to acyl-activating enzyme 17 (AAE17) [Arabidopsis thaliana] (TAIR:At5g23050.1); similar to Acetyl-CoA synthetase 2, isoform a [Homo sapiens] (GB:AAH12172.1); similar to OTTHUMP00000030713 [Homo sapiens] (GB:CAI19312.1); similar to OSJNBb0118P14.12 [Oryza sativa (japonica cultivar-group)] (GB:XP_472384.1); similar to OJ000315_02.12 [Oryza sativa (japonica cultivar-group)] (GB:CAE05367.3); similar to acetyl-CoA synthetase [Solanum tuberosum] (GB:CAA67130.1); contains InterPro domain AMP-dependent synthetase and ligase (InterPro:IPR000873)   chr5:14551843-14557516 REVERSE   Aliases: F5H8.15, F5H8_15 | 9.0 | 9.3  | -0.3 | -1.3 |
| 8413 AT3G58170.1   Symbol: ATBS14A   Bet1-like SNARE 1-1 / Bet1 / Sft1-like SNARE 14a / BS14a (BET11), identical to SP:Q9M2J9 Bet1-like SNARE 1-1 (AtBET11) (Bet1/Sft1-like SNARE 14a) (AtBS14a) (Mouse-ear cress) {Arabidopsis thaliana}; supporting cDNA gi:14030602:gb:AF368175.1:AF368175   chr3:21553344-21554918 REVERSE   Aliases: ATBET11, BET11, F9D24.80                                                                                                                                                                                                                                                                                      | 9.0 | 7.9  | 1.1  | 2.9  |
| 1050 AT1G75350.1   Symbol: EMB2184   ribosomal protein L31 family protein, similar to SP:O46917 from (Guillardia theta)   chr1:28275742-28276481 FORWARD   Aliases: EMB2184, EMBRYO DEFECTIVE 2184, F1B16.11, F1B16_11                                                                                                                                                                                                                                                                                                                                                                                                                                  | 9.0 | 7.2  | 1.8  | 9.4  |
| 6550 AT3G08730.1   Symbol: ATPK1   serine/threonine protein kinase (PK1) (PK6), identical to serine/threonine-protein kinase AtPK1/AtPK6 (ribosomal-protein S6 kinase ATPK6) (Arabidopsis thaliana) SWISS-PROT:P42818   chr3:2651453-2654189 REVERSE   Aliases: ATPK6, F17O14.20, PROTEIN SERINE KINASE                                                                                                                                                                                                                                                                                                                                                 | 9.0 | 8.1  | 0.9  | 3.7  |
| 10280 AT1G75680.1   glycosyl hydrolase family 9 protein, similar to endo-beta-1,4-glucanase GB:AAC12685 GI:3025470 from (Pinus radiata)   chr1:28420713-28423190 REVERSE   Aliases: F10A5.13, F10A5_13                                                                                                                                                                                                                                                                                                                                                                                                                                                  | 9.0 | 9.5  | -0.4 | -2.3 |
| 2304 AT1G09630.1   Symbol: ATRAB11C   Ras-related GTP-binding protein, putative, similar to GTP-binding protein GI:1370146 from (Lotus japonicus)   chr1:3118205-3119710 REVERSE   Aliases: F21M12.2, F21M12_2, RAS RELATED SMALL GTPASE                                                                                                                                                                                                                                                                                                                                                                                                                | 9.0 | 5.4  | 3.7  | 7.0  |
| 737 AT5G54290.1   cytochrome c biogenesis protein family, low similarity to cytochrome c biogenesis protein CcdA (Paracoccus pantotrophus) GI:11095328; contains Pfam profile PF02683: Cytochrome C biogenesis protein transmembrane region   chr5:22068263-22071604 FORWARD   Aliases: MDK4.11, MDK4_11                                                                                                                                                                                                                                                                                                                                                | 9.0 | 5.7  | 3.4  | 10.6 |
| 4669 AT5G45350.1   proline-rich family protein, contains proline rich extensin domains, INTERPRO:IPR002965   chr5:18399064-18400926 REVERSE   Aliases: MFC19.1, MFC19_1                                                                                                                                                                                                                                                                                                                                                                                                                                                                                 | 9.0 | 6.9  | 2.2  | 4.8  |
| 15828 AT2G26800.3   hydroxymethylglutaryl-CoA lyase, putative / 3-hydroxy-3-methylglutarate-CoA lyase, putative / HMG-CoA lyase, putative, similar to SP:P35915 Hydroxymethylglutaryl-CoA lyase (EC 4.1.3.4) (HMG-CoA lyase) {Gallus gallus}; contains Pfam profile PF00682: HMGL-like   chr2:11436888-11439810 REVERSE   Aliases: F12C20.16, F12C20_16                                                                                                                                                                                                                                                                                                 | 9.0 | 8.6  | 0.4  | 1.0  |
| 9653 AT3G13920.2   Symbol: EIF4A1                                                                                                                                                                                                                                                                                                                                                                                                                                                                                                                                                                                                                       | 9.0 | 7.6  | 1.5  | 2.5  |
| 3380 AT5G57330.1   aldose 1-epimerase family protein, contains Pfam profile PF01263 Aldose 1-epimerase   chr5:23235440-23238315 FORWARD   Aliases: MJB24.14, MJB24_14                                                                                                                                                                                                                                                                                                                                                                                                                                                                                   | 9.0 | 6.7  | 2.4  | 5.7  |
| 1589 AT1G76860.1   small nuclear ribonucleoprotein, putative / snRNP, putative / Sm protein, putative, similar to SWISS-PROT:Q9Y4Z1 U6 snRNA-associated Sm-like protein LSm3 (MDS017) (Mouse)   chr1:28859355-28860644 REVERSE   Aliases: F7O12.3, F7O12_3                                                                                                                                                                                                                                                                                                                                                                                              | 9.0 | 7.3  | 1.7  | 8.1  |
| 778 AT5G14105.1   expressed protein   chr5:4551991-4553053 REVERSE   Aliases: None                                                                                                                                                                                                                                                                                                                                                                                                                                                                                                                                                                      | 9.0 | 6.2  | 2.8  | 10.4 |
| 8030 AT5G12200.1   dihydropyrimidinase / DHPase / dihydropyrimidine amidohydrolase / hydantoinase (PYD2), identical to dihydropyrimidine amidohydrolase (PYD2) (Arabidopsis thaliana) GI:28194047; similar to SP:Q9EQF5 Dihydropyrimidinase (EC 3.5.2.2) (DHPase) (Hydantoinase) (DHP) {Mus musculus}; contains Pfam profile PF01979: Amidohydrolase family                                                                                                                                                                                                                                                                                             | 9.0 | 10.0 | -1.0 | -3.1 |



|                                                                                                                                                                                                                                                                                                                                                                                                                                                                                                                                                       |     |      |      |      |
|-------------------------------------------------------------------------------------------------------------------------------------------------------------------------------------------------------------------------------------------------------------------------------------------------------------------------------------------------------------------------------------------------------------------------------------------------------------------------------------------------------------------------------------------------------|-----|------|------|------|
| 5024 AT1G29900.1   Symbol: CARB   carbamoyl-phosphate synthase family protein, similar to carbamoylphosphate synthetase GI:6552726 from ( <i>Medicago sativa</i> ); contains Pfam profiles PF02786: Carbamoyl-phosphate synthase L chain ATP binding domain, PF00289: Carbamoyl-phosphate synthase L chain N-terminal domain, PF02787: Carbamoyl-phosphate synthetase large chain oligomerisation domain   chr1:10468038-10472195 FORWARD   Aliases: CARBAMOYL PHOSPHATE SYNTHETASE B, CARBAMOYL PHOSPHATE SYNTHETASE LARGE SUBUNIT, F1N18.6, F1N18_6 | 9.0 | 6.8  | 2.3  | 4.6  |
| 5463 AT4G05530.1   short-chain dehydrogenase/reductase (SDR) family protein, similar to peroxisomal short-chain alcohol dehydrogenase GI:4105190 from ( <i>Homo sapiens</i> )   chr4:2816392-2818362 FORWARD   Aliases: T1J24.9, T1J24_9                                                                                                                                                                                                                                                                                                              | 9.0 | 6.8  | 2.2  | 4.3  |
| 5063 AT1G05720.1   selenoprotein family protein, contains Prosite PS00190: Cytochrome c family heme-binding site signature; similar to 15 kDa selenoprotein (GI:12314088) { <i>Homo sapiens</i> }   chr1:1717461-1718852 REVERSE   Aliases: F3F20.17, F3F20_17                                                                                                                                                                                                                                                                                        | 9.0 | 7.8  | 1.3  | 4.5  |
| 16158 AT3G18820.1   Ras-related GTP-binding protein, putative, similar to Ras-related protein RAB7 GI:1370186 from ( <i>Pisum sativum</i> ), <i>Plant Mol. Biol.</i> 21 (6), 1195-1199 (1993); contains Pfam profile: PF00071 Ras family   chr3:6484107-6486252 FORWARD   Aliases: MVE11.21                                                                                                                                                                                                                                                           | 9.0 | 8.6  | 0.4  | 0.9  |
| 1132 AT5G66410.1   expressed protein   chr5:26537032-26538922 FORWARD   Aliases: K1F13.6, K1F13_6                                                                                                                                                                                                                                                                                                                                                                                                                                                     | 9.0 | 7.0  | 2.1  | 9.2  |
| 21090 AT2G29420.1   Symbol: ATGSTU7   glutathione S-transferase, putative   chr2:12625013-12625976 REVERSE   Aliases: F16P2.20, F16P2_20, GLUTATHIONE S TRANSFERASE 25, GST25                                                                                                                                                                                                                                                                                                                                                                         | 9.0 | 9.0  | 0.0  | 0.0  |
| 17339 AT2G14910.2   expressed protein   chr2:6413558-6416234 REVERSE   Aliases: T26I20.7, T26I20_7                                                                                                                                                                                                                                                                                                                                                                                                                                                    | 9.0 | 8.6  | 0.4  | 0.7  |
| 6430 AT2G41110.1   Symbol: ATCAL4                                                                                                                                                                                                                                                                                                                                                                                                                                                                                                                     | 9.0 | 6.9  | 2.2  | 3.8  |
| 6010 AT5G15450.1   heat shock protein 100, putative / HSP100, putative / heat shock protein clpB, putative / HSP100/ClpB, putative, similar to HSP100/ClpB GI:9651530 ( <i>Phaseolus lunatus</i> )   chr5:5014402-5018350 REVERSE   Aliases: T20K14.60, T20K14_60                                                                                                                                                                                                                                                                                     | 9.0 | 6.1  | 2.9  | 4.0  |
| 20714 AT2G20920.1   expressed protein   chr2:9005767-9007013 FORWARD   Aliases: F5H14.11, F5H14_11                                                                                                                                                                                                                                                                                                                                                                                                                                                    | 9.0 | 9.0  | -0.0 | -0.1 |
| 12151 AT3G56950.1   small basic membrane integral family protein, contains similarity to small basic membrane integral protein ZmSIP2-1 (GI:13447817) ( <i>Zea mays</i> )   chr3:21088985-21090810 REVERSE   Aliases: T8M16.9                                                                                                                                                                                                                                                                                                                         | 9.0 | 8.4  | 0.6  | 1.8  |
| 14612 ATMG00660.1   Symbol: ORF149                                                                                                                                                                                                                                                                                                                                                                                                                                                                                                                    | 9.0 | 10.2 | -1.2 | -1.2 |
| 17118 ATCG00140.1   Symbol: ATPH   ATPase III subunit   chrC:13262-13507 REVERSE   Aliases: ATPH                                                                                                                                                                                                                                                                                                                                                                                                                                                      | 9.0 | 8.7  | 0.3  | 0.8  |
| 12766 AT3G19130.1   Symbol: ATRBP47B   RNA-binding protein, putative, similar to RNA Binding Protein 47 ( <i>Nicotiana plumbaginifolia</i> ) GI:9663769, DNA binding protein ACBF GB:AAC49850 from ( <i>Nicotiana tabacum</i> ); contains InterPro entry IPR000504: RNA-binding region RNP-1 (RNA recognition motif) (RRM)   chr3:6611219-6614050 REVERSE   Aliases: ATRBP47B, MVI11.3                                                                                                                                                                | 9.0 | 9.4  | -0.3 | -1.6 |
| 10559 AT2G42590.3   Symbol: GRF9   similar to 14-3-3 protein GF14 iota (GRF12) [ <i>Arabidopsis thaliana</i> ] (TAIR:At1g26480.1); similar to 14-3-3 protein homolog [ <i>Maackia amurensis</i> ] (GB:AAC15418.1); similar to SGF14D [ <i>Glycine max</i> ] (GB:AAB09583.1); contains InterPro domain 14-3-3 protein (InterPro:IPR000308)   chr2:17738933-17741045 REVERSE   Aliases: F14N22.14, F14N22_14, GF14 MU                                                                                                                                   | 9.0 | 8.2  | 0.8  | 2.2  |
| 9457 AT3G19910.1   zinc finger (C3HC4-type RING finger) family protein, contains Pfam profile: PF00097 zinc finger, C3HC4 type (RING finger)   chr3:6926314-6929572 FORWARD   Aliases: MPN9.16                                                                                                                                                                                                                                                                                                                                                        | 9.0 | 8.2  | 0.8  | 2.5  |
| 2909 AT1G76260.1   transducin family protein / WD-40 repeat family protein, contains 6 WD-40 repeats (PF00400); similar to retinoblastoma A associated protein; RbAp48 (GI:3309245) ( <i>Xenopus laevis</i> )   chr1:28615206-28618838 FORWARD   Aliases: T23E18.19, T23E18_19                                                                                                                                                                                                                                                                        | 9.0 | 6.0  | 3.0  | 6.2  |
| 5843 AT5G08380.1   alpha-galactosidase, putative / melibiase, putative / alpha-D-galactoside galactohydrolase, putative, similar to alpha-galactosidase SP:Q42656 from ( <i>Coffea arabica</i> ); contains Pfam profile PF02065: Melibiase   chr5:2694678-2697688 REVERSE   Aliases: F8L15.110, F8L15_110                                                                                                                                                                                                                                             | 9.0 | 7.6  | 1.5  | 4.1  |
| 3626 AT1G27150.1   expressed protein   chr1:9429044-9432235 FORWARD   Aliases: T7N9.21, T7N9_21                                                                                                                                                                                                                                                                                                                                                                                                                                                       | 9.0 | 9.9  | -0.8 | -5.5 |
| 18124 AT5G07470.1   Symbol: PMSR3   peptide methionine sulfoxide reductase (MSR), nearly identical to peptide methionine sulfoxide reductase (msr) ( <i>Arabidopsis thaliana</i> ) GI:4884033   chr5:2362571-2364375 REVERSE   Aliases: PEPTIDEMETHIONINE SULFOXIDE REDUCTASE 3, T2I1.180, T2I1_180                                                                                                                                                                                                                                                   | 9.0 | 8.8  | 0.2  | 0.6  |
| 19183 AT5G09760.1   pectinesterase family protein, contains Pfam profile: PF01095 pectinesterase   chr5:3032376-3034544 FORWARD   Aliases: F17I14.50, F17I14_50                                                                                                                                                                                                                                                                                                                                                                                       | 9.0 | 9.1  | -0.1 | -0.4 |

|                                                                                                                                                                                                                                                                                                                                                                                                                                                                                                                                                                                                                                                                                                                                                                                                                                               |     |      |      |      |
|-----------------------------------------------------------------------------------------------------------------------------------------------------------------------------------------------------------------------------------------------------------------------------------------------------------------------------------------------------------------------------------------------------------------------------------------------------------------------------------------------------------------------------------------------------------------------------------------------------------------------------------------------------------------------------------------------------------------------------------------------------------------------------------------------------------------------------------------------|-----|------|------|------|
| 5707 AT2G34750.1   RNA polymerase I specific transcription initiation factor RRN3 family protein, contains Pfam PF05327: RNA polymerase I specific transcription initiation factor RRN3; similar to RRN3 (GI:7670100) (Homo sapiens) similar to RNA polymerase I specific transcription initiation factor RRN3 (Swiss-Prot:P36070) (Saccharomyces cerevisiae)   chr2:14667387-14671345 REVERSE   Aliases: T29F13.4, T29F13_4                                                                                                                                                                                                                                                                                                                                                                                                                  | 9.0 | 7.9  | 1.1  | 4.2  |
| 9866 AT5G11110.1   similar to sucrose-phosphate synthase, putative [Arabidopsis thaliana] (TAIR:At1g04920.1); similar to sucrose-phosphate synthase, putative [Arabidopsis thaliana] (TAIR:At5g20280.1); similar to sucrose-phosphate synthase, putative [Arabidopsis thaliana] (TAIR:At4g10120.1); similar to sucrose phosphate synthase [Lycopersicon esculentum] (GB:AAU29197.1); similar to sucrose-6-phosphate synthase [Nicotiana tabacum] (GB:AAF06792.1); similar to sucrose-phosphate synthase (EC 2.4.1.14) - spinach (GB:JQ2277); similar to sucrose-phosphate synthase [Solanum tuberosum] (GB:CAA51872.1); similar to sucrose phosphate synthase [Actinidia chinensis] (GB:AAL86360.1); contains InterPro domain Glycosyl transferase, group 1 (InterPro:IPR001296)   chr5:3536227-3541134 FORWARD   Aliases: T5K6.100, T5K6_100 | 9.0 | 8.0  | 1.0  | 2.4  |
| 12118 AT1G28440.1   leucine-rich repeat transmembrane protein kinase, putative, similar to receptor kinase GI:4105699 from (Arabidopsis thaliana)   chr1:9996810-10000433 FORWARD   Aliases: F3M18.12, F3M18_12                                                                                                                                                                                                                                                                                                                                                                                                                                                                                                                                                                                                                               | 9.0 | 8.2  | 0.8  | 1.8  |
| 17805 AT1G50430.1   Symbol: DWF5   7-dehydrocholesterol reductase / 7-DHC reductase / sterol delta-7-reductase (ST7R) / dwarf5 protein (DWF5), identical to SP:Q9LDU6 7-dehydrocholesterol reductase (EC 1.3.1.21) (7-DHC reductase) (Sterol delta-7-reductase) (Dwarf5 protein) {Arabidopsis thaliana}   chr1:18685614-18689307 REVERSE   Aliases: 7RED, DWARF 5, F11F12.21, F11F12_21, LE, LEPIDA, PA, PARVA, ST7R, STEROL DELTA 7 REDUCTASE, STEROL DELTA7 REDUCTASE                                                                                                                                                                                                                                                                                                                                                                       | 9.0 | 9.1  | -0.1 | -0.6 |
| 9784 AT1G67280.1   lactoylglutathione lyase, putative / glyoxalase I, putative, similar to putative lactoylglutathione lyase SP:Q39366, GI:2494843 from (Brassica oleracea)                                                                                                                                                                                                                                                                                                                                                                                                                                                                                                                                                                                                                                                                   | 9.0 | 8.0  | 1.0  | 2.4  |
| 4378 AT3G48570.1   protein transport protein SEC61 gamma subunit, putative, similar to Swiss-Prot:Q19967 protein transport protein SEC61 gamma subunit (Caenorhabditis elegans)   chr3:18014898-18015959 REVERSE   Aliases: T8P19.80                                                                                                                                                                                                                                                                                                                                                                                                                                                                                                                                                                                                          | 9.0 | 7.1  | 1.9  | 5.0  |
| 12026 AT3G44100.1   MD-2-related lipid recognition domain-containing protein / ML domain-containing protein, contains Pfam profile PF02221: ML domain   chr3:15877028-15878291 REVERSE   Aliases: F26G5.50                                                                                                                                                                                                                                                                                                                                                                                                                                                                                                                                                                                                                                    | 9.0 | 8.7  | 0.3  | 1.8  |
| 2759 AT4G14680.1   Symbol: APS3   sulfate adenylyltransferase 3 / ATP-sulfurylase 3 (APS3), identical to ATP sulfurylase (APS3) (Arabidopsis thaliana) GI:1575327   chr4:8413286-8415349 REVERSE   Aliases: DL3380C, FCAALL.128                                                                                                                                                                                                                                                                                                                                                                                                                                                                                                                                                                                                               | 9.0 | 5.6  | 3.4  | 6.4  |
| 604 AT3G21110.2   Symbol: PUR7   similar to SAICAR synthetase [Nicotiana tabacum] (GB:AAR06292.1); contains InterPro domain SAICAR synthetase (InterPro:IPR001636)   chr3:7402141-7405614 REVERSE   Aliases: 5' PHOSPHORIBOSYL 4 (N SUCCINOCARBOXAMIDE) 5 AMINOIMIDAZOLE SYNTHETASE, MSA6.26, PURC, SAICAR SYNTHETASE                                                                                                                                                                                                                                                                                                                                                                                                                                                                                                                         | 9.0 | 5.9  | 3.1  | 11.3 |
| 2260 AT5G40450.1   expressed protein   chr5:16202027-16212756 REVERSE   Aliases: MPO12.160, MPO12_160                                                                                                                                                                                                                                                                                                                                                                                                                                                                                                                                                                                                                                                                                                                                         | 9.0 | 11.2 | -2.2 | -7.0 |
| 10481 AT1G07750.1   cupin family protein, similar to legumin (11S-globulin) from Ginkgo biloba (GI:949869), 11S globulin from Avena sativa (GI:472867)   chr1:2404034-2405939 REVERSE   Aliases: F24B9.13, F24B9_13                                                                                                                                                                                                                                                                                                                                                                                                                                                                                                                                                                                                                           | 9.0 | 8.2  | 0.8  | 2.2  |
| 9375 AT3G24010.1   PHD finger family protein, contains Pfam profile: PF00628 PHD-finger   chr3:8675965-8678227 REVERSE   Aliases: F14O13.20                                                                                                                                                                                                                                                                                                                                                                                                                                                                                                                                                                                                                                                                                                   | 9.0 | 8.5  | 0.5  | 2.6  |
| 1887 AT4G37470.1   hydrolase, alpha/beta fold family protein, low similarity to SP:Q59093 3-oxoadipate enol-lactonase I (EC 3.1.1.24) (Enol-lactone hydrolase I) (Beta-ketoadipate enol-lactone hydrolase I) {Acinetobacter calcoaceticus}; contains Pfam profile PF00561: hydrolase, alpha/beta fold family   chr4:17616653-17618452 REVERSE   Aliases: F6G17.120, F6G17_120                                                                                                                                                                                                                                                                                                                                                                                                                                                                 | 9.0 | 10.4 | -1.4 | -7.6 |
| 21005 AT4G30760.2   expressed protein, contains Pfam profile PF04396: Protein of unknown function, DUF537   chr4:14982528-14983425 FORWARD   Aliases: T10C21.110, T10C21_110                                                                                                                                                                                                                                                                                                                                                                                                                                                                                                                                                                                                                                                                  | 9.0 | 9.0  | -0.0 | -0.0 |
| 1235 AT5G39340.1   Symbol: AHP3   two-component phosphorelay mediator 2 (HP2), nearly identical to ATHP2 (Arabidopsis thaliana) GI:4156243                                                                                                                                                                                                                                                                                                                                                                                                                                                                                                                                                                                                                                                                                                    | 9.0 | 7.6  | 1.4  | 8.9  |
| 711 AT4G02840.1   small nuclear ribonucleoprotein D1, putative / snRNP core protein D1, putative / Sm protein D1, putative, similar to small nuclear ribonucleoprotein Sm D1 (snRNP core protein D1, Sm-D1, Sm-D autoantigen) (Mouse) SWISS-PROT:P13641   chr4:1264627-1266486 FORWARD   Aliases: T5J8.16, T5J8_16                                                                                                                                                                                                                                                                                                                                                                                                                                                                                                                            | 9.0 | 6.9  | 2.1  | 10.7 |
| 13978 AT1G51710.1   Symbol: UBP6   ubiquitin-specific protease 6, putative (UBP6), similar to GI:11993465   chr1:19179313-19183631 REVERSE   Aliases: F19C24.8, F19C24_8, UBIQUITIN SPECIFIC PROTEASE 6                                                                                                                                                                                                                                                                                                                                                                                                                                                                                                                                                                                                                                       | 9.0 | 8.4  | 0.6  | 1.4  |
| 12773 AT2G26280.1   Symbol: CID7   smr (Small MutS Related) domain-containing protein, weak similarity to PRLI-interacting factor N (Arabidopsis thaliana) GI:11139276; contains Pfam profile PF01713: Smr domain   chr2:11194811-11198415 REVERSE   Aliases: T1D16.8, T1D16_8                                                                                                                                                                                                                                                                                                                                                                                                                                                                                                                                                                | 9.0 | 9.5  | -0.5 | -1.6 |
| 9842 AT5G19860.1   expressed protein, contains Pfam profile PF04398: Protein of unknown function, DUF538   chr5:6714266-6715877 REVERSE   Aliases: T29J13.3                                                                                                                                                                                                                                                                                                                                                                                                                                                                                                                                                                                                                                                                                   | 9.0 | 10.2 | -1.2 | -2.4 |

|                                                                                                                                                                                                                                                                                                                                                                                                                                                        |     |      |      |      |
|--------------------------------------------------------------------------------------------------------------------------------------------------------------------------------------------------------------------------------------------------------------------------------------------------------------------------------------------------------------------------------------------------------------------------------------------------------|-----|------|------|------|
| 5043 AT4G38890.1   dihydrouridine synthase family protein, contains Pfam domain, PF01207: Dihydrouridine synthase (Dus)   chr4:18135903-18139094 REVERSE   Aliases: F19H22.4                                                                                                                                                                                                                                                                           | 9.0 | 7.9  | 1.1  | 4.5  |
| 2440 AT1G66200.2   Symbol: ATGSR2                                                                                                                                                                                                                                                                                                                                                                                                                      | 9.0 | 12.5 | -3.5 | -6.8 |
| 5419 AT1G12410.1   Symbol: CLPR2   ATP-dependent Clp protease proteolytic subunit (ClpP2), identical to nClpP2 GI:5360589 from (Arabidopsis thaliana)   chr1:4223035-4225112 FORWARD   Aliases: CLPP2, F5O11.13, F5O11_13, NCLPP2                                                                                                                                                                                                                      | 9.0 | 7.4  | 1.6  | 4.3  |
| 799 AT4G26900.1   Symbol: AT HF   imidazole glycerol phosphate synthase hisHF, chloroplast / IGP synthase / ImGPP synthase / IGPS, identical to SP:Q9SZ30 Imidazole glycerol phosphate synthase hisHF, chloroplast precursor (IGP synthase) {Arabidopsis thaliana}   chr4:13515488-13520317 FORWARD   Aliases: HISHF                                                                                                                                   | 9.0 | 5.7  | 3.3  | 10.3 |
| 2536 AT4G15770.1   60S ribosome subunit biogenesis protein, putative, contains similarity to 60S ribosome subunit biogenesis protein NIP7 (Swiss-Prot:Q08962) (Saccharomyces cerevisiae)   chr4:8978009-8978877 FORWARD   Aliases: DL3925W, FCAALL.377                                                                                                                                                                                                 | 9.0 | 8.2  | 0.8  | 6.6  |
| 11119 AT5G17770.1   Symbol: ATCBR   NADH-cytochrome b5 reductase, identical to NADH-cytochrome b5 reductase (Arabidopsis thaliana) GI:4240116   chr5:5864253-5866650 REVERSE   Aliases: MVA3.120, MVA3_120                                                                                                                                                                                                                                             | 9.0 | 9.7  | -0.7 | -2.0 |
| 6933 AT1G62040.1   autophagy 8c (APG8c), identical to autophagy 8c (Arabidopsis thaliana) GI:19912155; contains Pfam profile PF02991: Microtubule associated protein 1A/1B, light chain 3   chr1:22936566-22938088 FORWARD   Aliases: F8K4.23, F8K4_23                                                                                                                                                                                                 | 9.0 | 8.2  | 0.8  | 3.6  |
| 6019 AT5G20060.3   similar to phospholipase/carboxylesterase family protein [Arabidopsis thaliana] (TAIR:At1g52700.1); similar to biostress-resistance-related protein [Triticum aestivum] (GB:AAM29178.1); contains InterPro domain Phospholipase/Carboxylesterase (InterPro:IPR003140)   chr5:6776277-6779616 FORWARD   Aliases: F28I16.210, F28I16_210                                                                                              | 9.0 | 7.5  | 1.4  | 4.0  |
| 5833 AT1G53850.1   Symbol: PAE1   20S proteasome alpha subunit E1 (PAE1), identical to 20S proteasome subunit PAE1 GI:3421087 from (Arabidopsis thaliana)   chr1:20107622-20109663 REVERSE   Aliases: 20S PROTEASOME SUBUNIT PAE1, T18A20.8, T18A20_8                                                                                                                                                                                                  | 9.0 | 7.7  | 1.3  | 4.1  |
| 5165 AT3G57090.1   expressed protein   chr3:21139509-21141167 FORWARD   Aliases: F24I3.170                                                                                                                                                                                                                                                                                                                                                             | 9.0 | 7.4  | 1.6  | 4.5  |
| 158 AT5G05990.1   mitochondrial glycoprotein family protein / MAM33 family protein, low similarity to SUAPRGA1 (Emericella nidulans) GI:6562379; contains Pfam profile PF02330: Mitochondrial glycoprotein                                                                                                                                                                                                                                             | 9.0 | 4.2  | 4.7  | 17.7 |
| 280 AT3G16140.1   photosystem I reaction center subunit VI, chloroplast, putative / PSI-H, putative (PSAH1), identical to SP:Q9SUI7; similar to PSI-H precursor (Nicotiana sylvestris) GI:407353; contains Pfam profile PF03244: Photosystem I reaction centre subunit VI   chr3:5468515-5469482 REVERSE   Aliases: MSL1.18                                                                                                                            | 9.0 | 4.5  | 4.5  | 14.8 |
| 447 AT5G23460.1   expressed protein   chr5:7912772-7913498 FORWARD   Aliases: K19M13.9, K19M13_9                                                                                                                                                                                                                                                                                                                                                       | 9.0 | 6.0  | 2.9  | 12.4 |
| 4572 AT5G05000.3   Symbol: OEP34   translocate of chloroplast 34 (TOC34) / GTP-binding protein (OEP34), contains Pfam PF04548: AIG1 family; contains TIGRFAM TIGR00991: GTP-binding protein and TIGR00231: small GTP-binding protein domain; 99.7% identical to atToc34 protein (GI:11557975) (Arabidopsis thaliana); similar to Chain A.                                                                                                              | 9.0 | 7.7  | 1.3  | 4.8  |
| 1151 AT5G44110.2   Symbol: POP1   similar to ABC transporter family protein [Arabidopsis thaliana] (TAIR:At1g03905.1); similar to hypothetical protein UM03153.1 [Ustilago maydis 521] (GB:EAK84383.1); contains InterPro domain ABC transporter (InterPro:IPR003439); contains InterPro domain ATP/GTP-binding site motif A (P-loop) (InterPro:IPR001687)                                                                                             | 9.0 | 11.5 | -2.5 | -9.1 |
| 9697 AT1G73990.1   Symbol: SPPA   peptidase U7 family protein, similar to protease IV GB:AAA57008 from (Escherichia coli); contains Pfam profile PF01343: Peptidase family U7   chr1:27828094-27832587 FORWARD   Aliases: F2P9.14, F2P9_14, SPPA                                                                                                                                                                                                       | 9.0 | 8.5  | 0.5  | 2.5  |
| 1960 AT5G56360.1   calmodulin-binding protein, similar to alpha glucosidase II beta subunit from GI:2104691 (Mus musculus)   chr5:22840528-22845223 REVERSE   Aliases: MCD7.9, MCD7_9                                                                                                                                                                                                                                                                  | 9.0 | 7.0  | 1.9  | 7.5  |
| 7837 AT1G09770.1   Symbol: ATCDC5                                                                                                                                                                                                                                                                                                                                                                                                                      | 9.0 | 7.7  | 1.3  | 3.2  |
| 7350 AT2G39990.1   Symbol: EIF2   eukaryotic translation initiation factor 3 subunit 5 / eIF-3 epsilon / eIF3f (TIF3F1), identical to SP:O04202 Eukaryotic translation initiation factor 3 subunit 5 (eIF-3 epsilon) (eIF3 p32 subunit) (eIF3f) {Arabidopsis thaliana}; contains Pfam profile PF01398: Mov34/MPN/PAD-1 family   chr2:16705174-16707090 REVERSE   Aliases: T28M21.15, T28M21_15, TRANSLATION INITIATION FACTOR EIF2 P47 SUBUNIT HOMOLOG | 9.0 | 7.3  | 1.7  | 3.4  |
| 13204 AT3G42050.1   vacuolar ATP synthase subunit H family protein, identical to probable vacuolar ATP synthase subunit H (EC 3.6.3.14)(V-ATPase H subunit) (Vacuolar proton pump H subunit) (Vacuolar proton pump subunit SFD) SP:Q9LX65 from (Arabidopsis thaliana); contains Pfam PF03224: V-ATPase subunit H   chr3:14239482-14244216 REVERSE   Aliases: F4M19.10                                                                                  | 9.0 | 9.7  | -0.7 | -1.5 |
| 5195 AT1G19835.1   expressed protein, contains Pfam PF05911: Plant protein of unknown function (DUF869)   chr1:6855943-6860323 REVERSE   Aliases: F14P1.24, F14P1_24                                                                                                                                                                                                                                                                                   | 9.0 | 9.9  | -1.0 | -4.5 |



|                   |                                                                                                                                                                                                                                                                                                                                                                                                                                                          |     |      |      |      |
|-------------------|----------------------------------------------------------------------------------------------------------------------------------------------------------------------------------------------------------------------------------------------------------------------------------------------------------------------------------------------------------------------------------------------------------------------------------------------------------|-----|------|------|------|
| 18693 AT3G03330.1 | short-chain dehydrogenase/reductase (SDR) family protein, contains INTERPRO family IPR002198 Short-chain dehydrogenase/reductase (SDR) superfamily   chr3:783339-786177 REVERSE   Aliases: T21P5.25, T21P5_25                                                                                                                                                                                                                                            | 9.0 | 9.1  | -0.1 | -0.5 |
| 3512 AT2G36930.1  | zinc finger (C2H2 type) family protein, contains Prosite PS00028: Zinc finger, C2H2 type, domain; weak similarity to Zinc finger protein T86 (Swiss-Prot:O00488) (Homo sapiens)   chr2:15516981-15518584 REVERSE   Aliases: T1J8.11, T1J8_11                                                                                                                                                                                                             | 9.0 | 7.0  | 2.0  | 5.6  |
| 817 AT4G19390.1   | expressed protein   chr4:10574779-10576439 REVERSE   Aliases: T5K18.170, T5K18_170                                                                                                                                                                                                                                                                                                                                                                       | 9.0 | 6.4  | 2.6  | 10.2 |
| 4153 AT3G49870.1  | Symbol: ATARLA1C   ADP-ribosylation factor, putative, similar to ADP-ribosylation factor-like protein 1 (SP:P40616) (Homo sapiens); ARF3 ADP-RIBOSYLATION FACTOR,GP:453191 Arabidopsis thaliana; contains domain PF00025: ADP-ribosylation factor family   chr3:18503435-18505124 REVERSE   Aliases: ATARLA1C, T16K5.220                                                                                                                                 | 9.0 | 10.1 | -1.2 | -5.1 |
| 7100 AT2G46330.2  | Symbol: AGP16   arabinogalactan-protein (AGP16), identical to gi:10880509:gb:AAG24284   chr2:19025581-19026328 REVERSE   Aliases: ARABINOGLACTAN PROTEIN 16, F11C10.2                                                                                                                                                                                                                                                                                    | 9.0 | 10.2 | -1.2 | -3.5 |
| 2243 AT3G16520.3  | UDP-glucuronosyl/UDP-glucosyl transferase family protein, contains Pfam profile: PF00201 UDP-glucuronosyl and UDP-glucosyl transferase   chr3:5619134-5620879 REVERSE   Aliases: MDC8.15                                                                                                                                                                                                                                                                 | 9.0 | 5.4  | 3.6  | 7.0  |
| 8535 AT2G31810.3  | acetolactate synthase small subunit, putative, similar to gi:5931761 from Nicotiana plumbaginifolia   chr2:13531299-13535578 FORWARD   Aliases: F20M17.15, F20M17_15                                                                                                                                                                                                                                                                                     | 9.0 | 7.6  | 1.3  | 2.9  |
| 4274 AT5G54750.1  | transport protein particle (TRAPP) component Bet3, putative, similar to SP:P36149 Transport protein particle 22 kDa subunit (TRAPP 22 kDa subunit) {Saccharomyces cerevisiae}; contains Pfam profile PF04051: Transport protein particle (TRAPP) component, Bet3                                                                                                                                                                                         | 9.0 | 7.3  | 1.6  | 5.0  |
| 19451 AT5G42520.1 | expressed protein   chr5:17017511-17019835 FORWARD   Aliases: MDH9.22, MDH9_22                                                                                                                                                                                                                                                                                                                                                                           | 9.0 | 9.0  | -0.1 | -0.3 |
| 11918 AT5G44790.1 | Symbol: RAN1   copper-exporting ATPase / responsive-to-antagonist 1 / copper-transporting ATPase (RAN1), identical to SP:Q9S7J8                                                                                                                                                                                                                                                                                                                          | 9.0 | 9.7  | -0.7 | -1.8 |
| 2247 AT4G24280.1  | Symbol: CPHSC70 1   heat shock protein 70, putative / HSP70, putative, strong similarity to heat shock protein 70 (Arabidopsis thaliana) GI:6746592; similar to heat shock 70 protein - Spinacia oleracea,PID:g2654208   chr4:12589998-12593640 FORWARD   Aliases: CPHSC70 1, T22A6.110, T22A6_110                                                                                                                                                       | 9.0 | 7.3  | 1.7  | 7.0  |
| 5740 AT4G12720.3  | MutT/nudix family protein, similar to SP:P53370 Nucleoside diphosphate-linked moiety X motif 6 {Homo sapiens}; contains Pfam profile PF00293: NUDIX domain   chr4:7487540-7490073 FORWARD   Aliases: T20K18.70, T20K18_70                                                                                                                                                                                                                                | 9.0 | 9.5  | -0.5 | -4.2 |
| 6976 AT2G44620.1  | Symbol: mtACP 1   acyl carrier protein, mitochondrial / ACP / NADH-ubiquinone oxidoreductase 9.6 kDa subunit, identical to SP:P53665 Acyl carrier protein, mitochondrial precursor (ACP) (NADH-ubiquinone oxidoreductase 9.6 kDa subunit) (MtACP-1) {Arabidopsis thaliana}; identical to cDNA acyl carrier protein precursor GI:468265   chr2:18421359-18422310 FORWARD   Aliases: F16B22.11, F16B22.28, F16B22_28, MITOCHONDRIAL ACYL CARRIER PROTEIN 1 | 9.0 | 7.3  | 1.6  | 3.5  |
| 5201 AT5G04590.1  | Symbol: SIR   sulfite reductase / ferredoxin (SIR), identical to sulfite reductase (Arabidopsis thaliana) GI:804953, GI:2584721                                                                                                                                                                                                                                                                                                                          | 9.0 | 6.6  | 2.4  | 4.5  |
| 3895 AT5G54500.1  | Symbol: FQR1   quinone reductase, putative, similar to 1,4-benzoquinone reductase (Phanerochaete chrysosporium)(GI:4454993); contains flavodoxin domain PF00258                                                                                                                                                                                                                                                                                          | 9.0 | 10.3 | -1.3 | -5.3 |
| 1999 AT1G72340.1  | eukaryotic translation initiation factor 2B family protein / eIF-2B family protein, similar to SP:Q64270 Translation initiation factor eIF-2B alpha subunit {Rattus norvegicus}; contains Pfam profile PF01008: Initiation factor 2 subunit family   chr1:27240543-27242274 FORWARD   Aliases: T10D10.19, T10D10_19                                                                                                                                      | 9.0 | 7.4  | 1.5  | 7.4  |
| 11894 AT3G61200.1 | thioesterase family protein, contains Pfam profile PF03061: thioesterase family protein   chr3:22668430-22669365 REVERSE   Aliases: T20K12.100                                                                                                                                                                                                                                                                                                           | 9.0 | 8.5  | 0.4  | 1.8  |
| 3235 AT2G27030.3  | Symbol: CAM2   calmodulin-2/3/5 (CAM5) (TCH1), identical to calmodulin GI:474183 from (Arabidopsis thaliana), SP:P25069 Calmodulin-2/3/5 {Arabidopsis thaliana}                                                                                                                                                                                                                                                                                          | 9.0 | 6.5  | 2.4  | 5.9  |
| 2677 AT4G33090.1  | Symbol: APM1   aminopeptidase M, similar to SP:Q11011 Puromycin-sensitive aminopeptidase (EC 3.4.11.-) (PSA) {Mus musculus}; contains Pfam profile PF01433: Peptidase family M1                                                                                                                                                                                                                                                                          | 8.9 | 10.9 | -2.0 | -6.5 |
| 4691 AT4G27230.1  | histone H2A, putative, strong similarity to histone H2A Arabidopsis thaliana GI:7595337, Triticum aestivum GI:536892, Picea abies SP:P35063; contains Pfam profile PF00125 Core histone H2A/H2B/H3/H4   chr4:13637345-13638425 REVERSE   Aliases: M4I22.40, M4I22_40                                                                                                                                                                                     | 8.9 | 6.4  | 2.5  | 4.8  |
| 4849 AT5G62540.1  | ubiquitin-conjugating enzyme 3 (UBC3), E2; identical to gi:431261, SP:P42746   chr5:25121160-25122845 FORWARD   Aliases: K19B1.15, K19B1_15                                                                                                                                                                                                                                                                                                              | 8.9 | 7.3  | 1.6  | 4.7  |

|                                                                                                                                                                                                                                                                                                                                                                                                                                                            |     |      |      |      |
|------------------------------------------------------------------------------------------------------------------------------------------------------------------------------------------------------------------------------------------------------------------------------------------------------------------------------------------------------------------------------------------------------------------------------------------------------------|-----|------|------|------|
| 8306 AT3G22890.1   Symbol: APS1   sulfate adenylyltransferase 1 / ATP-sulfurylase 1 (APS1), nearly identical to ATP sulfurylase (APS1) (Arabidopsis thaliana) GI:6606509   chr3:8112730-8114996 FORWARD   Aliases: F5N5.7                                                                                                                                                                                                                                  | 8.9 | 10.4 | -1.4 | -3.0 |
| 6366 AT5G50370.1   adenylate kinase, putative, similar to adenylate kinase (ATP-AMP transphosphorylase) (Arabidopsis thaliana) SWISS-PROT:O82514   chr5:20526385-20527926 REVERSE   Aliases: MXI22.8, MXI22_8                                                                                                                                                                                                                                              | 8.9 | 6.4  | 2.6  | 3.8  |
| 14683 AT4G29160.2   SNF7 family protein, contains Pfam domain, PF03357: SNF7 family   chr4:14380810-14382672 FORWARD   Aliases: F19B15.190, F19B15_190                                                                                                                                                                                                                                                                                                     | 8.9 | 8.7  | 0.2  | 1.2  |
| 5742 AT3G03070.1   NADH-ubiquinone oxidoreductase-related, contains weak similarity to NADH-ubiquinone oxidoreductase 13 kDa-A subunit, mitochondrial precursor (EC 1.6.5.3) (EC 1.6.99.3) (Complex I-13KD-A) (CI-13KD-A) (Swiss-Prot:P23934) (Bos taurus)   chr3:696306-698163 REVERSE   Aliases: T17B22.24, T17B22_24                                                                                                                                    | 8.9 | 7.7  | 1.3  | 4.2  |
| 16106 AT2G29210.1   splicing factor PWI domain-containing protein, contains Pfam profile PF01480: PWI domain                                                                                                                                                                                                                                                                                                                                               | 8.9 | 8.1  | 0.8  | 0.9  |
| 1072 AT3G60480.1   expressed protein   chr3:22358426-22359213 REVERSE   Aliases: T8B10.140                                                                                                                                                                                                                                                                                                                                                                 | 8.9 | 7.2  | 1.8  | 9.3  |
| 12814 AT5G07440.1   Symbol: GDH2   glutamate dehydrogenase 2 (GDH2), identical to glutamate dehydrogenase 2 (GDH 2) (Arabidopsis thaliana) SWISS-PROT:Q38946   chr5:2355938-2358195 FORWARD   Aliases: GLUTAMATE DEHYDROGENASE 2, T2I1.150, T2I1_150                                                                                                                                                                                                       | 8.9 | 9.4  | -0.5 | -1.6 |
| 1470 AT2G37470.1   histone H2B, putative, strong similarity to histone H2B from Lycopersicon esculentum GI:3021483, GI:3021485, Capsicum annuum SP:O49118; contains Pfam profile PF00125 Core histone H2A/H2B/H3/H4                                                                                                                                                                                                                                        | 8.9 | 5.4  | 3.5  | 8.3  |
| 11303 AT3G19170.1   Zinc metalloprotease pitrilysin subfamily A. Signal peptide degrading enzyme targeted to mitochondria and chloroplasts. Expressed only in siliques and flowers   chr3:6625427-6631946 REVERSE   Aliases: MVI11.6                                                                                                                                                                                                                       | 8.9 | 7.9  | 1.0  | 2.0  |
| 3730 AT1G79440.1   Symbol: ALDH5F1   succinate-semialdehyde dehydrogenase (SSADH1), similar to succinate-semialdehyde dehydrogenase (NADP+) (SSDH) (Escherichia coli) SWISS-PROT:P25526; identical to succinic semialdehyde dehydrogenase mRNA, nuclear gene encoding mitochondrial protein GI:6684441; contains TIGRfam profile TIGR01780:succinic semialdehyde dehydrogenase; contains Pfam profile PF00171: aldehyde dehydrogenase (NAD) family protein | 8.9 | 6.5  | 2.5  | 5.5  |
| 4628 AT5G06340.1   diadenosine 5',5'''-P1,P4-tetraphosphate hydrolase, putative, similar to diadenosine 5',5'''-P1,P4-tetraphosphate hydrolase from (Lupinus angustifolius) GI:1888557, (Hordeum vulgare subsp. vulgare) GI:2564253; contains Pfam profile PF00293: NUDIX domain   chr5:1936407-1938112 FORWARD   Aliases: MHF15.14, MHF15_14                                                                                                              | 8.9 | 6.2  | 2.7  | 4.8  |
| 6906 AT5G15910.1   dehydrogenase-related, low similarity to SP:Q9R1J0 NAD(P)-dependent steroid dehydrogenase (EC 1.1.1.-) {Mus musculus}   chr5:5193140-5195399 FORWARD   Aliases: F1N13.50, F1N13_50                                                                                                                                                                                                                                                      | 8.9 | 8.3  | 0.6  | 3.6  |
| 13339 ATCG00760.1   Symbol: RPL36   encodes a chloroplast ribosomal protein L36, a constituent of the large subunit of the ribosomal complex   chrC:79489-79602 REVERSE   Aliases: RPL36                                                                                                                                                                                                                                                                   | 8.9 | 7.6  | 1.3  | 1.5  |
| 15576 AT5G63620.2   oxidoreductase, zinc-binding dehydrogenase family protein, contains PFAM zinc-binding dehydrogenase domain PF00107   chr5:25483354-25485619 REVERSE   Aliases: MBK5.9, MBK5_9                                                                                                                                                                                                                                                          | 8.9 | 9.2  | -0.3 | -1.1 |
| 162 AT1G11330.1   S-locus lectin protein kinase family protein, contains Pfam domains, PF00954: S-locus glycoprotein family, PF00069: Protein kinase domain, and PF01453: Lectin (probable mannose binding)   chr1:3810221-3813607 FORWARD   Aliases: T28P6.2, T28P6_2                                                                                                                                                                                     | 8.9 | 3.3  | 5.6  | 17.4 |
| 9517 AT2G17640.1   Symbol: AtSerat3;1   serine O-acetyltransferase, putative (SAT-106), similar to Arabidopsis thaliana serine acetyltransferase GI:905391                                                                                                                                                                                                                                                                                                 | 8.9 | 8.3  | 0.6  | 2.5  |
| 13449 AT2G42790.1   citrate synthase, glyoxysomal, putative, strong similarity to SP:P49299 Citrate synthase, glyoxysomal precursor {Cucurbita maxima}; contains Pfam profile PF00285: Citrate synthase   chr2:17809933-17813126 REVERSE   Aliases: F7D19.21, F7D19_21                                                                                                                                                                                     | 8.9 | 9.5  | -0.6 | -1.5 |
| 8458 AT3G56880.1   VQ motif-containing protein, contains PF05678: VQ motif   chr3:21070894-21071944 FORWARD   Aliases: T8M16.210                                                                                                                                                                                                                                                                                                                           | 8.9 | 8.1  | 0.8  | 2.9  |
| 8769 AT3G23400.1   plastid-lipid associated protein PAP / fibrillin family protein, contains Pfam profile PF04755: PAP_fibrillin   chr3:8376454-8378307 REVERSE   Aliases: MLM24.13                                                                                                                                                                                                                                                                        | 8.9 | 7.6  | 1.3  | 2.8  |
| 14854 AT3G18430.1   calcium-binding EF hand family protein, similar to Calcineurin B subunit (Protein phosphatase 2B regulatory subunit) (Calcineurin regulatory subunit) SP:P42322 from (Naegleria gruberi); contains Pfam profile PF00036: EF hand                                                                                                                                                                                                       | 8.9 | 8.7  | 0.2  | 1.2  |
| 1042 AT5G57040.1   lactoylglutathione lyase family protein / glyoxalase I family protein, contains Pfam PF00903: glyoxalase family protein   chr5:23101131-23102472 REVERSE   Aliases: MHM17.18, MHM17_18                                                                                                                                                                                                                                                  | 8.9 | 6.9  | 2.0  | 9.4  |
| 1965 AT1G77540.1   expressed protein, similar to GB:AAD41433   chr1:29142570-29143103 REVERSE   Aliases: T5M16.13, T5M16_13                                                                                                                                                                                                                                                                                                                                | 8.9 | 6.1  | 2.8  | 7.5  |

|                                                                                                                                                                                                                                                                                                                                                                                                                                                             |     |     |      |      |
|-------------------------------------------------------------------------------------------------------------------------------------------------------------------------------------------------------------------------------------------------------------------------------------------------------------------------------------------------------------------------------------------------------------------------------------------------------------|-----|-----|------|------|
| 4933 AT4G12060.1   Clp amino terminal domain-containing protein, contains Pfam profile: PF02861 Clp amino terminal domain   chr4:7228001-7229935 REVERSE   Aliases: F16J13.130, F16J13_130                                                                                                                                                                                                                                                                  | 8.9 | 7.4 | 1.5  | 4.6  |
| 14941 NA                                                                                                                                                                                                                                                                                                                                                                                                                                                    | 8.9 | 9.4 | -0.5 | -1.2 |
| 6260 AT3G11400.1   Symbol: EIF3G1                                                                                                                                                                                                                                                                                                                                                                                                                           | 8.9 | 7.3 | 1.6  | 3.9  |
| 7871 AT4G09720.2   Ras-related GTP-binding protein, putative, similar to GTP-binding protein RAB7A from (Lotus japonicus)   chr4:6133293-6135180 FORWARD   Aliases: F17A8.70, F17A8_70                                                                                                                                                                                                                                                                      | 8.9 | 8.4 | 0.5  | 3.2  |
| 11462 AT4G09830.1   expressed protein   chr4:6188764-6190850 FORWARD   Aliases: F17A8.180, F17A8_180                                                                                                                                                                                                                                                                                                                                                        | 8.9 | 8.4 | 0.5  | 2.0  |
| 6402 AT5G55200.1   co-chaperone grpE protein, putative, similar to chaperone GrpE type 2 (Nicotiana tabacum) GI:3851640; contains Pfam profile PF01025: co-chaperone GrpE   chr5:22411860-22413777 FORWARD   Aliases: MCO15.15, MCO15_15                                                                                                                                                                                                                    | 8.9 | 7.8 | 1.1  | 3.8  |
| 18583 AT2G02160.1   zinc finger (CCCH-type) family protein, contains Pfam domain, PF00642: Zinc finger C-x8-C-x5-C-x3-H type (and similar)   chr2:553109-556082 REVERSE   Aliases: F5O4.7, F5O4_7                                                                                                                                                                                                                                                           | 8.9 | 8.5 | 0.4  | 0.5  |
| 12936 AT2G04520.1   eukaryotic translation initiation factor 1A, putative / eIF-1A, putative / eIF-4C, putative, strong similarity to translation initiation factor (eIF-1A) (Beta vulgaris) GI:17977975; contains Pfam profile PF01176: Eukaryotic initiation factor 1A   chr2:1574589-1575856 REVERSE   Aliases: T1O3.7, T1O3_7                                                                                                                           | 8.9 | 8.4 | 0.5  | 1.6  |
| 1769 AT3G63390.1   expressed protein   chr3:23422141-23422943 REVERSE   Aliases: MAA21.20                                                                                                                                                                                                                                                                                                                                                                   | 8.9 | 7.1 | 1.8  | 7.8  |
| 3243 AT1G52380.1   Ran-binding protein 1 domain-containing protein / RanBP1 domain-containing protein, weak similarity to SP:Q09717 Ran-specific GTPase-activating protein 1 (Ran binding protein 1) (RANBP1) (Spi1-binding protein) {Schizosaccharomyces pombe}; contains Pfam profile PF00638: RanBP1 domain   chr1:19512654-19515207 FORWARD   Aliases: F19K6.4, F19K6_4                                                                                 | 8.9 | 7.6 | 1.3  | 5.9  |
| 2625 AT2G19740.1   60S ribosomal protein L31 (RPL31A)   chr2:8520599-8521601 FORWARD   Aliases: F6F22.23, F6F22_23                                                                                                                                                                                                                                                                                                                                          | 8.9 | 6.1 | 2.8  | 6.6  |
| 4196 AT3G12650.1   expressed protein   chr3:4017837-4018638 REVERSE   Aliases: T2E22.4                                                                                                                                                                                                                                                                                                                                                                      | 8.9 | 8.0 | 0.9  | 5.1  |
| 3431 AT5G62630.1   expressed protein   chr5:25160821-25163685 REVERSE   Aliases: MRG21.5, MRG21_5                                                                                                                                                                                                                                                                                                                                                           | 8.9 | 7.1 | 1.8  | 5.7  |
| 4382 AT1G14720.1   Symbol: XTR2   xyloglucan:xyloglucosyl transferase / xyloglucan endotransglycosylase / endo-xyloglucan transferase (XTR2), identical to endoxyloglucan transferase (Arabidopsis thaliana) GI:5533311   chr1:5066631-5068629 REVERSE   Aliases: ENDOXYLOGLUCAN TRANSFERASE A2, EXGT A2, F10B6.12, F10B6_12, XYLOGLUCAN ENDOTRANSGLYCOSYLASE 2, XYLOGLUCAN ENDOTRANSGLYCOSYLASE RELATED 2, XYLOGLUCAN ENDOTRANSGLYCOSYLASE RELATED PROTEIN | 8.9 | 7.7 | 1.2  | 5.0  |
| 11424 AT5G52820.1   WD-40 repeat family protein / notchless protein, putative, similar to notchless (Xenopus laevis) GI:3687833; contains Pfam PF00400: WD domain, G-beta repeat (8 copies)   chr5:21418582-21421579 FORWARD   Aliases: MXC20.4, MXC20_4                                                                                                                                                                                                    | 8.9 | 8.3 | 0.6  | 2.0  |
| 5769 AT5G04910.1   expressed protein, ; expression supported by MPSS   chr5:1437696-1438771 FORWARD   Aliases: MUG13.24, MUG13_24                                                                                                                                                                                                                                                                                                                           | 8.9 | 7.9 | 1.0  | 4.2  |
| 8548 AT1G63290.1   ribulose-phosphate 3-epimerase, cytosolic, putative / pentose-5-phosphate 3-epimerase, putative, strong similarity to D-ribulose-5-phosphate 3-epimerase (Oryza sativa) GI:6007803; contains Pfam profile PF00834: Ribulose-phosphate 3 epimerase family                                                                                                                                                                                 | 8.9 | 8.0 | 0.9  | 2.9  |
| 4690 AT3G07880.1   Rho GDP-dissociation inhibitor family protein, similar to SP:P52565 Rho GDP-dissociation inhibitor 1 (Rho GDI 1) (Rho-GDI alpha) {Homo sapiens}; contains Pfam profile PF02115: RHO protein GDP dissociation inhibitor   chr3:2513977-2515828 FORWARD   Aliases: F17A17.22                                                                                                                                                               | 8.9 | 7.4 | 1.5  | 4.8  |
| 1202 AT5G09770.1   ribosomal protein L17 family protein, contains Pfam profile: PF01196 ribosomal protein L17   chr5:3035047-3036543 REVERSE   Aliases: F17I14.40, F17I14_40                                                                                                                                                                                                                                                                                | 8.9 | 6.1 | 2.8  | 9.0  |
| 9721 AT3G28730.1   Symbol: ATHMG   structure-specific recognition protein 1 / high mobility group protein / HMG protein, nearly identical to SP:Q05153 Structure-specific recognition protein 1 homolog (HMG protein) {Arabidopsis thaliana}; contains Pfam profile PF00505: HMG (high mobility group) box; contains Pfam profile PF03531: Structure-specific recognition protein   chr3:10786126-10790386 FORWARD   Aliases: HIGH MOBILITY GROUP, T19N8.3  | 8.9 | 9.2 | -0.3 | -2.5 |
| 14105 AT4G12590.1   expressed protein, contains Pfam PF05863: Eukaryotic protein of unknown function (DUF850)   chr4:7451001-7453085 REVERSE   Aliases: T1P17.180, T1P17_180                                                                                                                                                                                                                                                                                | 8.9 | 7.5 | 1.4  | 1.4  |
| 20265 AT1G74230.1   glycine-rich RNA-binding protein, similar to RNA-binding protein GB:S46286 from (Nicotiana glauca)   chr1:27918367-27920744 FORWARD   Aliases: F1O17.10, F1O17_10                                                                                                                                                                                                                                                                       | 8.9 | 8.9 | -0.0 | -0.2 |



|                                                                                                                                                                                                                                                                                                                                                                                                                                                 |     |      |      |      |
|-------------------------------------------------------------------------------------------------------------------------------------------------------------------------------------------------------------------------------------------------------------------------------------------------------------------------------------------------------------------------------------------------------------------------------------------------|-----|------|------|------|
| 2935 AT4G26300.1   Symbol: EMB1027   arginyl-tRNA synthetase, putative / arginine--tRNA ligase, putative, similar to SP:P37880 Arginyl-tRNA synthetase (EC 6.1.1.19) (Arginine--tRNA ligase) (ArgRS) {Cricetulus longicaudatus}; contains Pfam profiles PF00750: arginyl-tRNA synthetase, PF03485: arginyl-tRNA synthetase N-terminal domain   chr4:13307986-13313118 REVERSE   Aliases: EMB1027, EMBRYO DEFECTIVE 1027, T25K17.110, T25K17_110 | 8.9 | 6.8  | 2.0  | 6.2  |
| 14535 AT5G45410.2   expressed protein, similar to expressed protein [Arabidopsis thaliana] (TAIR:At4g25030.1); similar to expressed protein [Arabidopsis thaliana] (TAIR:At4g25030.2); similar to unknown protein [Oryza sativa (japonica cultivar-group)] (GB:XP_476693.1)   chr5:18419135-18421010 REVERSE   Aliases: MFC19.8, MFC19_8                                                                                                        | 8.9 | 7.8  | 1.1  | 1.3  |
| 11279 AT5G19690.1   Symbol: STT3A   oligosaccharyl transferase STT3 subunit family protein, similar to SP:P39007 Oligosaccharyl transferase STT3 subunit {Saccharomyces cerevisiae}; contains Pfam profile PF02516: Oligosaccharyl transferase STT3 subunit                                                                                                                                                                                     | 8.9 | 8.3  | 0.5  | 2.0  |
| 806 AT5G64816.2   expressed protein   chr5:25930226-25931229 FORWARD   Aliases: None                                                                                                                                                                                                                                                                                                                                                            | 8.9 | 6.3  | 2.6  | 10.2 |
| 4614 AT1G28580.2   GDSL-motif lipase, putative, similar to lipase (Arabidopsis thaliana) GI:1145627; contains InterPro Entry IPR001087 Lipolytic enzyme, G-D-S-L family   chr1:10044323-10046413 REVERSE   Aliases: F1K23.18, F1K23_18                                                                                                                                                                                                          | 8.9 | 10.1 | -1.2 | -4.8 |
| 14318 AT4G01610.2   cathepsin B-like cysteine protease, putative, similar to cathepsin B-like cysteine proteinase GI:609175 from (Nicotiana rustica); contains an unusually short, 5nt exon   chr4:694695-697126 FORWARD   Aliases: T15B16.17, T15B16_17                                                                                                                                                                                        | 8.9 | 9.8  | -0.9 | -1.3 |
| 15955 AT4G08850.2   leucine-rich repeat family protein / protein kinase family protein, contains Pfam domains PF00560: Leucine Rich Repeat and PF00069: Protein kinase domain   chr4:5637335-5640633 REVERSE   Aliases: T32A17.160, T32A17_160                                                                                                                                                                                                  | 8.9 | 9.1  | -0.2 | -1.0 |
| 3974 AT5G19350.1   RNA-binding protein 45 (RBP45), putative                                                                                                                                                                                                                                                                                                                                                                                     | 8.9 | 7.9  | 1.0  | 5.3  |
| 13545 AT1G65720.1   expressed protein   chr1:24443922-24444736 REVERSE   Aliases: F1E22.9, F1E22_9                                                                                                                                                                                                                                                                                                                                              | 8.9 | 8.2  | 0.7  | 1.5  |
| 20945 AT1G15920.2   CCR4-NOT transcription complex protein, putative, similar to SWISS-PROT:Q60809 CCR4-NOT transcription complex, subunit 7 (CCR4-associated factor 1, (CAF1) (Mus musculus)   chr1:5469397-5471143 FORWARD   Aliases: T24D18.2, T24D18_2                                                                                                                                                                                      | 8.9 | 8.9  | -0.0 | -0.0 |
| 6568 AT1G29990.1   prefoldin, putative, similar to Swiss-Prot:O15212 prefoldin subunit 6 (Protein Ke2) (Homo sapiens)   chr1:10507577-10509029 FORWARD   Aliases: T1P2.3, T1P2_3                                                                                                                                                                                                                                                                | 8.9 | 7.2  | 1.6  | 3.7  |
| 7607 AT3G06035.1   expressed protein   chr3:1823105-1824188 REVERSE   Aliases: None                                                                                                                                                                                                                                                                                                                                                             | 8.9 | 8.1  | 0.8  | 3.3  |
| 1920 AT5G61310.3   similar to cytochrome c oxidase subunit Vc family protein / COX5C family protein [Arabidopsis thaliana] (TAIR:At2g47380.1); similar to cytochrome c oxidase subunit 5c [Helianthus annuus] (GB:AAL67939.1); contains InterPro domain Cytochrome c oxidase subunit Vc (InterPro:IPR008432)   chr5:24670635-24672079 REVERSE   Aliases: MFB13.16, MFB13_16                                                                     | 8.9 | 6.8  | 2.1  | 7.5  |
| 9356 AT5G24760.2   alcohol dehydrogenase, putative, similar to alcohol dehydrogenase from Solanum tuberosum (SP:p14673); contains Pfam zinc-binding dehydrogenase domain PF00107   chr5:8494795-8497303 REVERSE   Aliases: T4C12.30                                                                                                                                                                                                             | 8.9 | 8.1  | 0.8  | 2.6  |
| 9890 AT5G62350.1   invertase/pectin methylesterase inhibitor family protein / DC 1.2 homolog (FL5-2I22), similar to SP:Q42534 Pectinesterase 2 precursor (EC 3.1.1.11) (Pectin methylesterase 2) (PE 2) {Arabidopsis thaliana}; contains Pfam profile PF04043: Plant invertase/pectin methylesterase inhibitor; FL5-2I22 mRNA for DC 1.2 homolog, partial cds GI:11127598   chr5:25054652-25055588 FORWARD   Aliases: MMI9.21, MMI9_21          | 8.9 | 8.3  | 0.6  | 2.4  |
| 440 AT1G67820.1   protein phosphatase 2C, putative / PP2C, putative, similar to protein phosphatase 2C emb:CAA72341.1   chr1:25433516-25435725 FORWARD   Aliases: F12A21.5, F12A21_5                                                                                                                                                                                                                                                            | 8.9 | 4.9  | 3.9  | 12.5 |
| 5921 AT1G21570.1   zinc finger (CCCH-type) family protein, contains Pfam domain, PF00642: Zinc finger C-x8-C-x5-C-x3-H type (and similar)   chr1:7557251-7560272 REVERSE   Aliases: F24J8.21, F24J8_21                                                                                                                                                                                                                                          | 8.9 | 10.4 | -1.5 | -4.1 |
| 9095 AT5G56170.1   expressed protein, contains similarity to GPI-anchored protein   chr5:22753195-22754512 FORWARD   Aliases: MDA7.23, MDA7_23                                                                                                                                                                                                                                                                                                  | 8.9 | 9.5  | -0.6 | -2.7 |
| 6386 AT3G51310.1   vacuolar protein sorting-associated protein 35 family protein / VPS35 family protein, similar to vacuolar protein sorting 35 (Mus musculus) GI:11875394; contains Pfam profile PF03635: Vacuolar protein sorting-associated protein 35   chr3:19055502-19060300 REVERSE   Aliases: F24M12.350                                                                                                                                | 8.9 | 8.1  | 0.8  | 3.8  |
| 2743 AT1G09130.2   similar to ATP-dependent Clp protease proteolytic subunit (ClpR1) (nClpP5) [Arabidopsis thaliana] (TAIR:At1g49970.1); similar to COG0740: Protease subunit of ATP-dependent Clp proteases [Nostoc punctiforme PCC 73102] (GB:ZP_00108611.1); contains InterPro domain Clp protease (InterPro:IPR001907)   chr1:2939928-2942269 REVERSE   Aliases: F7G19.1, F7G19_1                                                           | 8.9 | 5.6  | 3.3  | 6.4  |
| 40 AT3G63140.1   mRNA-binding protein, putative, similar to mRNA binding protein precursor (GI:26453355) (Lycopersicon esculentum)   chr3:23337347-23339684 REVERSE   Aliases: T20O10.240                                                                                                                                                                                                                                                       | 8.9 | 2.5  | 6.4  | 27.1 |

|                                                                                                                                                                                                                                                                                                                                                   |     |      |      |      |
|---------------------------------------------------------------------------------------------------------------------------------------------------------------------------------------------------------------------------------------------------------------------------------------------------------------------------------------------------|-----|------|------|------|
| 1815 AT5G59480.2   haloacid dehalogenase-like hydrolase family protein, low similarity to SP:P53078 SSM1 protein {Saccharomyces cerevisiae}; contains InterPro accession IPR005834: Haloacid dehalogenase-like hydrolase   chr5:23996649-23998793 REVERSE   Aliases: F2O15.10, F2O15_10                                                           | 8.9 | 4.3  | 4.6  | 7.7  |
| 17129 ATCG00660.1   Symbol: RPL20   encodes a chloroplast ribosomal protein L20, a constituent of the large subunit of the ribosomal complex   chrC:68512-68865 REVERSE   Aliases: RPL20                                                                                                                                                          | 8.9 | 7.9  | 1.0  | 0.8  |
| 6641 AT5G56290.1   Symbol: PEX5   peroxisomal targeting signal type 1 receptor (PEX5), identical to GI:3603353; contains Pfam profile PF00515 TPR Domain   chr5:22803755-22809345 FORWARD   Aliases: MXK23.3, MXK23_3                                                                                                                             | 8.9 | 7.5  | 1.3  | 3.7  |
| 536 AT4G19710.2   bifunctional aspartate kinase/homoserine dehydrogenase, putative / AK-HSDH, putative, similar to gb:X71364 (PIR:S46497) aspartate kinase / homoserine dehydrogenase from Arabidopsis thaliana   chr4:10724865-10729681 FORWARD   Aliases: T16H5.70, T16H5_70                                                                    | 8.9 | 4.3  | 4.5  | 11.7 |
| 1230 AT5G17710.2   Symbol: EMB1241   co-chaperone grpE family protein, similar to co-chaperone CGE1 precursor isoform a (Chlamydomonas reinhardtii) GI:15384277; contains Pfam profile PF01025: co-chaperone GrpE   chr5:5839345-5841707 REVERSE   Aliases: EMB1241, EMBRYO DEFECTIVE 1241, MVA3.60, MVA3_60                                      | 8.9 | 5.4  | 3.5  | 8.9  |
| 15095 AT5G44340.1   Symbol: TUB4   tubulin beta-4 chain (TUB4), nearly identical to SP:P24636 Tubulin beta-4 chain {Arabidopsis thaliana}   chr5:17876422-17878328 REVERSE   Aliases: K9L2.12, K9L2_12                                                                                                                                            | 8.9 | 9.4  | -0.6 | -1.1 |
| 14372 AT5G48340.1   expressed protein   chr5:19607765-19610115 FORWARD   Aliases: K23F3.6, K23F3_6                                                                                                                                                                                                                                                | 8.9 | 8.2  | 0.6  | 1.3  |
| 5535 AT1G74840.1   myb family transcription factor, similar to myb-related transcription activator GI:9279717 from (Arabidopsis thaliana)   chr1:28119558-28121066 REVERSE   Aliases: F25A4.19, F25A4_19                                                                                                                                          | 8.9 | 10.2 | -1.3 | -4.3 |
| 3981 AT1G72550.2   tRNA synthetase beta subunit family protein, contains Pfam profiles: PF03484 phenylalanine-tRNA synthetase, B5 domain, PF03483 B3/4 domain; an isoform contains a non-consensus TG acceptor splice site at a terminal exon.   chr1:27323413-27327677 REVERSE   Aliases: F28P22.26, F28P22_26                                   | 8.9 | 7.0  | 1.9  | 5.3  |
| 763 AT1G78630.1   Symbol: EMB1473   ribosomal protein L13 family protein, similar to ribosomal protein L13 GI:170132 from (Spinacia oleracea)   chr1:29580849-29582551 FORWARD   Aliases: EMB1473, EMBRYO DEFECTIVE 1473, T30F21.4, T30F21_4                                                                                                      | 8.9 | 4.1  | 4.7  | 10.5 |
| 7148 AT1G54680.1   expressed protein   chr1:20416721-20418149 FORWARD   Aliases: T22H22.11, T22H22_11                                                                                                                                                                                                                                             | 8.9 | 7.7  | 1.2  | 3.5  |
| 445 AT1G30760.1   FAD-binding domain-containing protein, similar to SP:P30986 reticuline oxidase precursor (Berberine-bridge-forming enzyme) (BBE) (Tetrahydroprotoberberine synthase) (Eschscholzia californica); contains PF01565 FAD binding domain   chr1:10918260-10920659 FORWARD   Aliases: T17H7.1                                        | 8.9 | 2.7  | 6.2  | 12.4 |
| 2266 AT4G19860.1   lecithin:cholesterol acyltransferase family protein / LACT family protein, similar to lysosomal phospholipase A2 (Mus musculus) GI:18699602; contains Pfam profile PF02450: Lecithin:cholesterol acyltransferase (phosphatidylcholine-sterol acyltransferase)   chr4:10777522-10780373 REVERSE   Aliases: T16H5.220, T16H5_220 | 8.9 | 11.4 | -2.5 | -7.0 |
| 17656 AT5G40490.1   RNA recognition motif (RRM)-containing protein, ribonucleoprotein, Xenopus laevis, PIR:S40778; contains InterPro entry IPR000504: RNA-binding region RNP-1 (RNA recognition motif) (RRM)                                                                                                                                      | 8.9 | 8.6  | 0.2  | 0.6  |
| 6082 AT3G22845.1   emp24/gp25L/p24 protein-related, contains weak similarity to transmembrane protein (GI:1212965) (Homo sapiens)   chr3:8087314-8088754 FORWARD   Aliases: F5N5.1                                                                                                                                                                | 8.9 | 7.7  | 1.2  | 4.0  |
| 7739 AT2G46505.1   Symbol: SDH4   expressed protein   chr2:19096801-19097621 REVERSE   Aliases: None                                                                                                                                                                                                                                              | 8.9 | 7.2  | 1.6  | 3.2  |
| 12961 AT3G62560.1   GTP-binding protein, putative, similar to GTP-binding protein SAR1A (SP:O04834) (Arabidopsis thaliana); small GTP-binding protein Bsar1a - Brassica campestris, EMBL:U55035   chr3:23148459-23150021 FORWARD   Aliases: T12C14.260                                                                                            | 8.9 | 8.3  | 0.6  | 1.6  |
| 2939 AT3G48730.1   glutamate-1-semialdehyde 2,1-aminomutase 2 (GSA 2) / glutamate-1-semialdehyde aminotransferase 2 (GSA-AT 2), identical to GSA2 (SP:Q42522)   chr3:18060608-18062687 FORWARD   Aliases: T8P19.240                                                                                                                               | 8.9 | 5.2  | 3.6  | 6.2  |
| 12836 AT2G24500.1   Symbol: FZF   zinc finger (C2H2 type) family protein, contains Pfam profile: PF00096 zinc finger, C2H2 type   chr2:10408115-10409948 REVERSE   Aliases: C2H2 ZINC FINGER PROTEIN FZF, T28I24.23, T28I24_23                                                                                                                    | 8.9 | 8.6  | 0.3  | 1.6  |
| 14921 AT5G07350.1   tudor domain-containing protein / nuclease family protein, contains Pfam domains PF00567: Tudor domain and PF00565: Staphylococcal nuclease homologue   chr5:2320082-2325420 REVERSE   Aliases: T21I.60, T21I_60                                                                                                              | 8.8 | 9.1  | -0.3 | -1.2 |
| 2738 AT3G02190.1   60S ribosomal protein L39 (RPL39B), similar to ribosomal protein L39 GB:P51424 (Arabidopsis thaliana)   chr3:405823-406408 REVERSE   Aliases: F1C9.36                                                                                                                                                                          | 8.8 | 7.3  | 1.6  | 6.4  |

|                                                                                                                                                                                                                                                                                                                                     |     |     |      |      |
|-------------------------------------------------------------------------------------------------------------------------------------------------------------------------------------------------------------------------------------------------------------------------------------------------------------------------------------|-----|-----|------|------|
| 7925 AT3G60240.1   Symbol: EIF4G   MIF4G domain-containing protein / MA3 domain-containing protein, similar to eukaryotic protein synthesis initiation factor (Homo sapiens) GI:3941724; contains Pfam profiles PF02854: MIF4G domain, PF02847: MA3 domain                                                                          | 8.8 | 8.1 | 0.8  | 3.2  |
| 8989 AT5G08535.2   D111/G-patch domain-containing protein, contains Pfam profile PF01585: G-patch domain; contains a 2nt micro-exon, as identified using GeneSeqer.                                                                                                                                                                 | 8.8 | 9.4 | -0.5 | -2.7 |
| 2813 AT3G20670.1   histone H2A, putative, strong similarity to histone H2A GB:AAF64418 GI:7595337 from Arabidopsis thaliana, Triticum aestivum GI:536892; contains Pfam profile PF00125 Core histone H2A/H2B/H3/H4   chr3:7229417-7230508 FORWARD   Aliases: F3H11.6                                                                | 8.8 | 5.9 | 3.0  | 6.3  |
| 11886 AT1G50380.1   prolyl oligopeptidase family protein, similar to oligopeptidase B (Leishmania major) GI:4581757; contains Pfam profiles PF00326: prolyl oligopeptidase family, PF02897: Prolyl oligopeptidase, N-terminal beta-propeller domain   chr1:18665977-18670146 FORWARD   Aliases: F14I3.4, F14I3_4                    | 8.8 | 8.2 | 0.7  | 1.8  |
| 811 AT1G08580.1   expressed protein   chr1:2715086-2716387 REVERSE   Aliases: F22O13.6, F22O13_6                                                                                                                                                                                                                                    | 8.8 | 5.9 | 3.0  | 10.2 |
| 1816 AT4G28830.1   expressed protein   chr4:14232452-14234005 FORWARD   Aliases: F16A16.60, F16A16_60                                                                                                                                                                                                                               | 8.8 | 6.5 | 2.4  | 7.7  |
| 14680 AT2G30930.1   expressed protein   chr2:13169517-13170473 FORWARD   Aliases: F7F1.14, F7F1_14                                                                                                                                                                                                                                  | 8.8 | 8.4 | 0.4  | 1.2  |
| 5311 AT1G20540.1   transducin family protein / WD-40 repeat family protein, contains 6 WD-40 repeats (PF00400); similar to Rbap46 polypeptide (GI:9454362) (Gallus gallus)   chr1:7112611-7115810 FORWARD   Aliases: F5M15.14, F5M15_14                                                                                             | 8.8 | 7.5 | 1.3  | 4.4  |
| 4040 AT1G21065.1   expressed protein   chr1:7374199-7375778 FORWARD   Aliases: None                                                                                                                                                                                                                                                 | 8.8 | 7.5 | 1.4  | 5.2  |
| 10103 AT4G24380.2   expressed protein, similar to expressed protein [Arabidopsis thaliana] (TAIR:At5g65400.1); similar to unknown protein [Oryza sativa (japonica cultivar-group)] (GB:XP_479601.1)   chr4:12612545-12614027 FORWARD   Aliases: T22A6.210, T22A6_210                                                                | 8.8 | 8.0 | 0.8  | 2.3  |
| 20671 AT4G23630.1   reticulon family protein (RTNLB1), weak similarity to Nogo-C protein (Rattus norvegicus) GI:6822251; contains Pfam profile PF02453: Reticulon   chr4:12317834-12319947 FORWARD   Aliases: F9D16.100, F9D16_100                                                                                                  | 8.8 | 8.9 | -0.1 | -0.1 |
| 2858 AT2G05630.1   Symbol: atg8d   autophagy 8d (APG8d), identical to autophagy 8d (Arabidopsis thaliana) GI:19912157; contains Pfam profile PF02991: Microtubule associated protein 1A/1B, light chain 3   chr2:2082983-2084879 REVERSE   Aliases: T20G20.2, T20G20_2                                                              | 8.8 | 7.2 | 1.6  | 6.3  |
| 3951 AT1G53290.1   galactosyltransferase family protein, contains Pfam profile: PF01762 galactosyltransferase ;contains similarity to Avr9 elicitor response protein GI:4138265 from (Nicotiana tabacum)   chr1:19874967-19877158 FORWARD   Aliases: F12M16.19, F12M16_19                                                           | 8.8 | 6.8 | 2.0  | 5.3  |
| 18563 AT2G37110.1   expressed protein, contains Pfam profile PF04749: Protein of unknown function, DUF614   chr2:15599636-15601072 FORWARD   Aliases: T2N18.13, T2N18_13                                                                                                                                                            | 8.8 | 9.0 | -0.1 | -0.5 |
| 3975 AT1G66670.1   Symbol: CLPP3   ATP-dependent Clp protease proteolytic subunit (ClpP3), identical to ATP-dependent Clp protease (nClpP3) GI:5360591 (Arabidopsis thaliana)   chr1:24867448-24869363 REVERSE   Aliases: F4N21.19, F4N21_19, NCLPP3, NCLPP4                                                                        | 8.8 | 7.2 | 1.7  | 5.3  |
| 1248 AT3G06790.2   plastid developmental protein DAG, putative, similar to DAG protein, chloroplast precursor (Garden snapdragon) SWISS-PROT:Q38732                                                                                                                                                                                 | 8.8 | 5.5 | 3.3  | 8.8  |
| 17351 AT4G24820.2   26S proteasome regulatory subunit, putative (RPN7), contains similarity to ubiquitin activating enzyme GI:3647283 from (Lycopersicon esculentum)                                                                                                                                                                | 8.8 | 8.1 | 0.7  | 0.7  |
| 4760 AT5G22290.1   Symbol: ANAC089   no apical meristem (NAM) family protein, contains Pfam PF02365: No apical meristem (NAM) domain   chr5:7375926-7377626 REVERSE   Aliases: ANAC089, T6G21.9                                                                                                                                     | 8.8 | 6.9 | 1.9  | 4.7  |
| 19575 AT2G33150.1   Symbol: PED1   acetyl-CoA C-acyltransferase, putative / 3-ketoacyl-CoA thiolase, putative, similar to 3-ketoacyl-CoA thiolase (E.C. 2.3.1.16) from (Arabidopsis thaliana) GI:2981616, (Cucumis sativus) GI:393707, (Cucurbita cv. Kurokawa Amakuri) GI:1694621; contains InterPro accession IPR002155: Thiolase | 8.8 | 8.6 | 0.2  | 0.3  |
| 342 AT1G07070.1   60S ribosomal protein L35a (RPL35aA), similar to ribosomal protein L35a GI:57118 from (Rattus norvegicus)   chr1:2168563-2169850 FORWARD   Aliases: F10K1.22, F10K1_22                                                                                                                                            | 8.8 | 4.6 | 4.2  | 13.7 |
| 11825 AT5G18420.3   expressed protein, non-consensus GC donor splice site at exon 1, unknown (C40) protein, Homo sapiens, EMBL:AF103798   chr5:6105524-6109380 REVERSE   Aliases: F20L16.140, F20L16_140                                                                                                                            | 8.8 | 8.3 | 0.6  | 1.9  |
| 839 AT3G52420.1   outer envelope membrane protein, putative, similar to outer envelope membrane protein gi:703236:gb:AAA63414   chr3:19440753-19440947 FORWARD   Aliases: F22O6.200                                                                                                                                                 | 8.8 | 6.6 | 2.2  | 10.1 |
| 19413 AT5G03630.1   monodehydroascorbate reductase, putative, monodehydroascorbate reductase (NADH), cucumber, PIR:JU0182   chr5:922165-924676 REVERSE   Aliases: F17C15.50, F17C15_50                                                                                                                                              | 8.8 | 9.1 | -0.3 | -0.3 |



|                                                                                                                                                                                                                                                                                                                                                                                                                                                                                     |     |      |      |       |
|-------------------------------------------------------------------------------------------------------------------------------------------------------------------------------------------------------------------------------------------------------------------------------------------------------------------------------------------------------------------------------------------------------------------------------------------------------------------------------------|-----|------|------|-------|
| 9994 AT2G21620.2   Symbol: RD2   universal stress protein (USP) family protein / responsive to desiccation protein (RD2), strong similarity to RD2 protein (Arabidopsis thaliana) GI:15320408; contains Pfam profile PF00582: universal stress protein family; identical to cDNA RD2 GI:15320407   chr2:9255678-9257319 FORWARD   Aliases: F2G1.11, F2G1_11                                                                                                                         | 8.8 | 9.9  | -1.1 | -2.4  |
| 8175 AT3G25860.1   Symbol: LTA2   dihydrolipoamide S-acetyltransferase (LTA2), identical to dihydrolipoamide S-acetyltransferase (LTA2) (Arabidopsis thaliana) GI:5881963   chr3:9461797-9464024 FORWARD   Aliases: DIHYDROLIPOAMIDE S ACETYLTRANSFERASE, MPE11.6, PLASTID E2 SUBUNIT OF PYRUVATE DECARBOXYLASE, PLE2                                                                                                                                                               | 8.8 | 6.9  | 2.0  | 3.0   |
| 4586 AT1G41830.1   Symbol: SKS6   multi-copper oxidase type I family protein, similar to pollen-specific BP10 protein (SP:Q00624)(Brassica napus); contains Pfam profile: PF00394 Multicopper oxidase   chr1:15606058-15610302 REVERSE   Aliases: F5A13.5, F5A13_5, SKS6                                                                                                                                                                                                            | 8.8 | 6.7  | 2.1  | 4.8   |
| 1629 AT1G04870.2   protein arginine N-methyltransferase family protein, similar to SP:Q96LA8 Protein arginine N-methyltransferase 6 (EC 2.1.1.-) {Homo sapiens}   chr1:1373233-1375741 REVERSE   Aliases: F13M7.14, F13M7_14                                                                                                                                                                                                                                                        | 8.8 | 5.9  | 2.9  | 8.0   |
| 12759 AT2G24830.1   zinc finger (CCCH-type) family protein / D111/G-patch domain-containing protein, contains Pfam profiles PF01585: G-patch domain, PF00642: Zinc finger C-x8-C-x5-C-x3-H type (and similar)   chr2:10583408-10586309 REVERSE   Aliases: F27C12.25, F27C12_25                                                                                                                                                                                                      | 8.8 | 8.3  | 0.5  | 1.6   |
| 10212 AT5G11560.1   PQQ enzyme repeat-containing protein, contains Pfam profile PF01011: PQQ enzyme repeat   chr5:3709482-3714042 REVERSE   Aliases: F15N18.150, F15N18_150                                                                                                                                                                                                                                                                                                         | 8.8 | 9.6  | -0.8 | -2.3  |
| 176 AT3G15850.1   Symbol: FAD5   fatty acid desaturase family protein, similar to delta 9 acyl-lipid desaturase (ADS1) GI:2970034 from (Arabidopsis thaliana)   chr3:5359016-5361192 FORWARD   Aliases: ADS3, FADB, FATTY ACID DESATURASE 5, FATTY ACID DESATURASE B, JB67, MSJ11.25                                                                                                                                                                                                | 8.8 | 3.6  | 5.2  | 17.0  |
| 832 AT5G24300.1   starch synthase, putative, similar to starch synthase I-1 GI:9369334 from (Triticum aestivum)   chr5:8266802-8271199 FORWARD   Aliases: MOP9.12, MOP9_12                                                                                                                                                                                                                                                                                                          | 8.8 | 4.8  | 4.0  | 10.1  |
| 13726 AT5G05210.1   nucleolar matrix protein-related, contains Pfam domain, PF04935: Surfeit locus protein 6                                                                                                                                                                                                                                                                                                                                                                        | 8.8 | 8.2  | 0.6  | 1.4   |
| 758 AT1G42970.1   Symbol: GAPB   glyceraldehyde-3-phosphate dehydrogenase B, chloroplast (GAPB) / NADP-dependent glyceraldehydephosphate dehydrogenase subunit B, identical to SP:P25857 Glyceraldehyde 3-phosphate dehydrogenase B, chloroplast precursor (EC 1.2.1.13) (NADP-dependent glyceraldehydephosphate dehydrogenase subunit B) {Arabidopsis thaliana}   chr1:16129874-16132283 FORWARD   Aliases: F13A11.3, F13A11_3, GLYCERALDEHYDE 3 PHOSPHATE DEHYDROGENASE B SUBUNIT | 8.8 | 3.5  | 5.3  | 10.5  |
| 7467 AT3G50210.3   similar to 2-oxoacid-dependent oxidase, putative (DIN11) [Arabidopsis thaliana] (TAIR:At3g49620.1); similar to putative 2-oxoacid-dependent oxidase [Oryza sativa (japonica cultivar-group)] (GB:XP_450237.1); contains InterPro domain Isopenicillin N synthase (InterPro:IPR002283); contains InterPro domain 2OG-Fe(II) oxygenase superfamily (InterPro:IPR005123)   chr3:18625154-18627417 REVERSE   Aliases: F11C1.50                                       | 8.8 | 9.5  | -0.7 | -3.3  |
| 19678 AT1G50300.1   zinc finger (Ran-binding) family protein / RNA recognition motif (RRM)-containing protein, similar to SP:Q27294 RNA-binding protein cabeza {Drosophila melanogaster}; contains Pfam profiles: PF00076 RNA recognition motif (aka RRM, RBD, or RNP domain), PF00641: Zn-finger in Ran binding protein and others   chr1:18632356-18635610 REVERSE   Aliases: F14I3.10, F14I3_10                                                                                  | 8.8 | 9.0  | -0.2 | -0.3  |
| 19801 AT1G59610.1   Symbol: ADL3   dynamin-like protein, putative (ADL3), strong similarity to dynamin-like protein 6 (ADL6) (Arabidopsis thaliana) GI:6651399; contains Pfam profiles PF01031: Dynamin central region, PF00350: Dynamin family, PF02212: Dynamin GTPase effector domain, PF00169: PH domain; identical to cDNA dynamin-like protein ADL3, GI:4803835   chr1:21896886-21904750 FORWARD   Aliases: CF1, DYNAMIN LIKE 3, T30E16.17, T30E16_17                         | 8.8 | 8.9  | -0.1 | -0.2  |
| 12062 AT1G30120.1   Symbol: PDH E1 BETA   pyruvate dehydrogenase E1 component beta subunit, chloroplast, identical to pyruvate dehydrogenase E1 beta subunit (Arabidopsis thaliana) GI:2454184; identical to cDNA pyruvate dehydrogenase E1 beta subunit mRNA, nuclear gene encoding plastid protein GI:2454183   chr1:10584144-10586615 REVERSE   Aliases: PYRUVATE DEHYDROGENASE E1 BETA                                                                                          | 8.8 | 8.3  | 0.5  | 1.8   |
| 1100 AT1G20110.1   zinc finger (FYVE type) family protein, contains Pfam profile: PF01363 FYVE zinc finger   chr1:6971476-6974812 FORWARD   Aliases: T20H2.10, T20H2_10                                                                                                                                                                                                                                                                                                             | 8.8 | 10.7 | -1.9 | -9.3  |
| 335 AT1G67730.1   b-keto acyl reductase, putative (GLOSSY8), similar to b-keto acyl reductase GI:2586127 from (Hordeum vulgare)   chr1:25395123-25397273 FORWARD   Aliases: F12A21.14, F12A21_14                                                                                                                                                                                                                                                                                    | 8.8 | 11.5 | -2.7 | -13.8 |
| 309 AT5G55280.1   Symbol: FTSZ1 1   cell division protein FtsZ, chloroplast, putative (FTSZ), identical to SP:Q42545 Cell division protein ftsZ homolog, chloroplast precursor {Arabidopsis thaliana}; similar to FtsZ1 (Tagetes erecta) GI:8896066; contains Pfam profiles PF00091: Tubulin/FtsZ family, GTPase domain, PF03953: Tubulin/FtsZ family, C-terminal domain   chr5:22437882-22439838 REVERSE   Aliases: ATFTSZ1 1, CPFTSZ, MCO15.23, MCO15_23                          | 8.8 | 4.5  | 4.3  | 14.2  |
| 15823 AT5G52240.1   Symbol: MSBP1   cytochrome b5 domain-containing protein, similar to SP:P70580 Membrane associated progesterone receptor component 1 {Rattus norvegicus}; contains Pfam profile PF00173: Heme/Steroid binding domain   chr5:21230286-21231965 FORWARD   Aliases: ATMP1, F17P19.14, F17P19_14                                                                                                                                                                     | 8.8 | 8.4  | 0.4  | 1.0   |
| 12511 AT5G55400.1   fimbrin-like protein, putative, similar to fimbrin-like protein (ATFIM1) (Arabidopsis thaliana) GI:2905893; contains Pfam profile PF00307: Calponin homology (CH) domain                                                                                                                                                                                                                                                                                        | 8.8 | 7.7  | 1.1  | 1.7   |

|                                                                                                                                                                                                                                                                                                                                                                                                                                                                                                                                                                                                                                                                                                                                     |     |     |      |      |
|-------------------------------------------------------------------------------------------------------------------------------------------------------------------------------------------------------------------------------------------------------------------------------------------------------------------------------------------------------------------------------------------------------------------------------------------------------------------------------------------------------------------------------------------------------------------------------------------------------------------------------------------------------------------------------------------------------------------------------------|-----|-----|------|------|
| 16606 AT4G11220.1   reticulon family protein (RTNLB2), similar to SP:Q64548 Reticulon 1 (Neuroendocrine-specific protein) {Rattus norvegicus}; contains Pfam profile PF02453: Reticulon   chr4:6837946-6839791 REVERSE   Aliases: F8L21.10, F8L21_10                                                                                                                                                                                                                                                                                                                                                                                                                                                                                | 8.8 | 9.1 | -0.3 | -0.8 |
| 1438 AT5G44710.1   expressed protein, similar to unknown protein (ref:NP_011731.1)   chr5:18058153-18059787 FORWARD   Aliases: K23L20.5, K23L20_5                                                                                                                                                                                                                                                                                                                                                                                                                                                                                                                                                                                   | 8.8 | 5.5 | 3.4  | 8.4  |
| 1429 AT3G50360.1   Symbol: ATCEN2                                                                                                                                                                                                                                                                                                                                                                                                                                                                                                                                                                                                                                                                                                   | 8.8 | 6.3 | 2.5  | 8.4  |
| 4470 AT2G15290.1   expressed protein   chr2:6649408-6651117 REVERSE   Aliases: F27O10.6, F27O10_6                                                                                                                                                                                                                                                                                                                                                                                                                                                                                                                                                                                                                                   | 8.8 | 6.7 | 2.1  | 4.9  |
| 19658 AT2G01100.3   expressed protein   chr2:81455-83217 FORWARD   Aliases: F23H14.7, F23H14_7                                                                                                                                                                                                                                                                                                                                                                                                                                                                                                                                                                                                                                      | 8.8 | 8.9 | -0.1 | -0.3 |
| 13284 AT5G51620.2   expressed protein   chr5:20984324-20985253 FORWARD   Aliases: K17N15.17, K17N15_17                                                                                                                                                                                                                                                                                                                                                                                                                                                                                                                                                                                                                              | 8.8 | 8.2 | 0.6  | 1.5  |
| 7784 AT2G26300.1   Symbol: GPA1   guanine nucleotide binding protein (G-protein) alpha-1 subunit / GP-alpha-1 (GPA1), identical to SP:P18064 Guanine nucleotide-binding protein alpha-1 subunit (GP-alpha-1) {Arabidopsis thaliana}   chr2:11204373-11208070 FORWARD   Aliases: G PROTEIN ALPHA SUBUNIT, G PROTEIN ALPHA SUBUNIT 1, GP ALPHA 1, T1D16.6, T1D16_6                                                                                                                                                                                                                                                                                                                                                                    | 8.8 | 7.9 | 0.9  | 3.2  |
| 7142 AT3G51880.2   Symbol: HMGB1   high mobility group protein alpha (HMGalpha) / HMG protein alpha, nearly identical to HMG protein (HMGalpha) (Arabidopsis thaliana) GI:2832357; contains Pfam profile PF00505: HMG (high mobility group) box   chr3:19257980-19260072 REVERSE   Aliases: ATEM1.13, HIGH MOBILITY GROUP B 1, HMG ALPHA, NFD1                                                                                                                                                                                                                                                                                                                                                                                      | 8.8 | 7.8 | 1.0  | 3.5  |
| 15122 AT3G26580.1   expressed protein   chr3:9760124-9761781 FORWARD   Aliases: MFE16.11                                                                                                                                                                                                                                                                                                                                                                                                                                                                                                                                                                                                                                            | 8.8 | 8.4 | 0.4  | 1.1  |
| 910 AT4G21280.2   similar to oxygen-evolving enhancer protein 3, chloroplast, putative (PSBQ2) [Arabidopsis thaliana] (TAIR:At4g05180.1); similar to chloroplast oxygen-evolving enhancer protein [Manihot esculenta] (GB:AAV74404.1); contains InterPro domain Twin-arginine translocation pathway signal (InterPro:IPR006311); contains InterPro domain Oxygen evolving enhancer 3 (InterPro:IPR008797)   chr4:11334412-11335783 FORWARD   Aliases: T6K22.20                                                                                                                                                                                                                                                                      | 8.8 | 5.1 | 3.7  | 9.8  |
| 8767 AT4G28470.1   similar to 26S proteasome regulatory subunit S2 (RPN1) [Arabidopsis thaliana] (TAIR:At2g20580.1); similar to Unknown (protein for MGC:83116) [Xenopus laevis] (GB:AAH68911.1); similar to MGC97650 protein [Xenopus tropicalis] (GB:NP_001015819.1); similar to putative 26S proteasome regulatory subunit S2 [Oryza sativa (japonica cultivar-group)] (GB:BAD54002.1); similar to putative proteasome 26S non-ATPase subunit 2 [Oryza sativa (japonica cultivar-group)] (GB:XP_450542.1); similar to MGC83233 protein [Xenopus laevis] (GB:AAH68957.1); contains InterPro domain Proteasome/cyclosome, regulatory subunit (InterPro:IPR002015)   chr4:14066882-14072549 REVERSE   Aliases: F20O9.150, F20O9_150 | 8.8 | 8.1 | 0.7  | 2.8  |
| 20583 AT1G72440.1   CCAAT-box-binding transcription factor-related, similar to CCAAT-box-binding transcription factor (CCAAT-binding factor) (CBF) (Swiss-Prot:Q03701) (Homo sapiens), GB:P53569 (Mus musculus)   chr1:27271827-27277258 REVERSE   Aliases: T10D10.9, T10D10_9                                                                                                                                                                                                                                                                                                                                                                                                                                                      | 8.8 | 8.9 | -0.1 | -0.1 |
| 2138 AT5G49510.2   similar to unnamed protein product [Mus musculus] (GB:BAC37066.1); similar to PREDICTED: similar to von Hippel-Lindau binding protein 1 [Canis familiaris] (GB:XP_538210.1); similar to PFD3_MOUSE Prefoldin subunit 3 (Von Hippel-Lindau binding protein 1) (VHL binding protein-1) (VBP-1) (GB:P61759); similar to von Hippel-Lindau binding protein 1 [Homo sapiens] (GB:AAV38411.1); similar to von Hippel-Lindau binding protein 1 [synthetic construct] (GB:AAV38448.1); contains InterPro domain Putative prefoldin chaperone (InterPro:IPR004127)   chr5:20097841-20100147 FORWARD   Aliases: K6M13.5, K6M13_5                                                                                           | 8.8 | 7.0 | 1.8  | 7.2  |
| 13853 AT2G40600.1   appr-1-p processing enzyme family protein, contains Pfam domain PF01661: Appr-1-p processing enzyme family   chr2:16953948-16955615 REVERSE   Aliases: T2P4.5, T2P4_5                                                                                                                                                                                                                                                                                                                                                                                                                                                                                                                                           | 8.8 | 8.4 | 0.4  | 1.4  |
| 18000 AT3G55050.2   serine/threonine protein phosphatase 2C (PP2C6), identical to Ser/Thr protein phosphatase 2C (PP2C6) (GI:15020818) (Arabidopsis thaliana); similar to protein phosphatase 2C (GI:3608412) (Mesembryanthemum crystallinum); contains Pfam PF00481 : Protein phosphatase 2C domain; contains TIGRFAM TIGR01573 : CRISPR-associated protein Cas2   chr3:20411465-20413572 REVERSE   Aliases: T15C9.50                                                                                                                                                                                                                                                                                                              | 8.8 | 8.9 | -0.1 | -0.6 |
| 5151 ATCG01090.1   Symbol: NDHI   Encodes subunit of the chloroplast NAD(P)H dehydrogenase complex                                                                                                                                                                                                                                                                                                                                                                                                                                                                                                                                                                                                                                  | 8.8 | 7.1 | 1.7  | 4.5  |
| 16316 AT3G02910.1   expressed protein, contains Pfam domain PF03674: Uncharacterised protein family (UPF0131)   chr3:649821-650928 FORWARD   Aliases: F13E7.14, F13E7_14                                                                                                                                                                                                                                                                                                                                                                                                                                                                                                                                                            | 8.8 | 9.4 | -0.6 | -0.9 |
| 19021 AT4G21470.1   riboflavin kinase/FAD synthetase family protein, contains Pfam profiles PF01687: Riboflavin kinase / FAD synthetase, PF00702: haloacid dehalogenase-like hydrolase   chr4:11431135-11433332 FORWARD   Aliases: F18E5.90, F18E5_90                                                                                                                                                                                                                                                                                                                                                                                                                                                                               | 8.8 | 8.7 | 0.1  | 0.4  |
| 7756 AT5G41600.1   reticulon family protein (RTNLB4), weak similarity to Nogo-C protein (Rattus norvegicus) GI:6822251, SP:O95197 Reticulon protein 3 (Neuroendocrine-specific protein-like) {Homo sapiens}; contains Pfam profile PF02453: Reticulon   chr5:16653358-16654921 FORWARD   Aliases: MBK23.13, MBK23_13                                                                                                                                                                                                                                                                                                                                                                                                                | 8.8 | 6.1 | 2.6  | 3.2  |
| 12431 AT5G47030.1   ATP synthase delta' chain, mitochondrial, identical to SP:Q96252 ATP synthase delta' chain, mitochondrial precursor (EC 3.6.3.14) {Arabidopsis thaliana}; contains Pfam profile PF02823: ATP synthase, Delta/Epsilon chain, beta-sandwich domain                                                                                                                                                                                                                                                                                                                                                                                                                                                                | 8.8 | 7.1 | 1.7  | 1.7  |

|                                                                                                                                                                                                                                                                                                                                                               |     |     |      |      |
|---------------------------------------------------------------------------------------------------------------------------------------------------------------------------------------------------------------------------------------------------------------------------------------------------------------------------------------------------------------|-----|-----|------|------|
| 2207 AT5G44000.1   glutathione S-transferase C-terminal domain-containing protein, contains Pfam domain PF00043: Glutathione S-transferase, C-terminal domain   chr5:17719357-17721178 REVERSE   Aliases: MRH10.11, MRH10_11                                                                                                                                  | 8.8 | 6.6 | 2.2  | 7.1  |
| 7404 AT1G21670.1   expressed protein, similar to TolB protein precursor (SP:P50601) {Pseudomonas aeruginosa}   chr1:7610387-7612671 FORWARD   Aliases: F8K7.9, F8K7_9                                                                                                                                                                                         | 8.8 | 6.7 | 2.1  | 3.4  |
| 4725 AT1G15370.1   expressed protein   chr1:5287057-5288506 FORWARD   Aliases: F9L1.32, F9L1_32                                                                                                                                                                                                                                                               | 8.8 | 7.5 | 1.3  | 4.7  |
| 10642 AT4G24920.1   protein transport protein SEC61 gamma subunit, putative, similar to Swiss-Prot:Q19967 protein transport protein SEC61 gamma subunit (Caenorhabditis elegans)   chr4:12819521-12820746 REVERSE   Aliases: F13M23.60, F13M23_60                                                                                                             | 8.8 | 8.0 | 0.8  | 2.2  |
| 3937 AT2G39730.3   Symbol: RCA   ribulose biphosphate carboxylase/oxygenase activase / RuBisCO activase, identical to SWISS-PROT:P10896 ribulose biphosphate carboxylase/oxygenase activase, chloroplast precursor (RuBisCO activase, RA)(Arabidopsis thaliana)   chr2:16577824-16580597 REVERSE   Aliases: RUBISCO ACTIVASE, T5I7.18                         | 8.8 | 5.1 | 3.7  | 5.3  |
| 17128 AT3G20870.1   metal transporter family protein, contains ZIP Zinc transporter domain, Pfam:PF02535   chr3:7309359-7312708 REVERSE   Aliases: MOE17.18                                                                                                                                                                                                   | 8.8 | 9.1 | -0.3 | -0.8 |
| 5895 AT1G31870.2   similar to splicing factor PWI domain-containing protein [Arabidopsis thaliana] (TAIR:At2g29210.1); similar to unknown protein [Oryza sativa (japonica cultivar-group)] (GB:XP_480359.1); contains InterPro domain Bipartite nuclear localization signal (InterPro:IPR001472)   chr1:11436703-11440089 FORWARD   Aliases: F5M6.12, F5M6_12 | 8.8 | 7.4 | 1.4  | 4.1  |
| 18009 AT3G17240.3   Symbol: LPD2   dihydrolipoamide dehydrogenase 2, mitochondrial / lipoamide dehydrogenase 2 (MTLPD2), nearly identical to GB:AAF34796 (gi:6984216) from (Arabidopsis thaliana); alternative splice form exists   chr3:5889883-5892255 REVERSE   Aliases: LIPOAMIDE DEHYDROGENASE 2, MGD8.7                                                 | 8.8 | 9.0 | -0.2 | -0.6 |
| 1704 AT1G62480.1   vacuolar calcium-binding protein-related, contains weak similarity to vacuolar calcium binding protein (Raphanus sativus) gi:9049359:dbj:BAA99394   chr1:23132370-23133424 FORWARD   Aliases: T3P18.4, T3P18_4                                                                                                                             | 8.8 | 6.5 | 2.3  | 7.9  |
| 12090 AT1G25530.1   lysine and histidine specific transporter, putative, similar to lysine and histidine specific transporter GI:2576361 from (Arabidopsis thaliana); contains Pfam profile PF01490: Transmembrane amino acid transporter protein   chr1:8964531-8967378 REVERSE   Aliases: F2J7.5, F2J7_5                                                    | 8.8 | 7.7 | 1.1  | 1.8  |
| 10218 AT5G48020.1   expressed protein   chr5:19479884-19482183 REVERSE   Aliases: MDN11.10, MDN11_10                                                                                                                                                                                                                                                          | 8.8 | 8.0 | 0.8  | 2.3  |
| 11796 AT4G17790.1   expressed protein   chr4:9891064-9892807 FORWARD   Aliases: DL4930W, FCAALL.62                                                                                                                                                                                                                                                            | 8.8 | 9.2 | -0.4 | -1.9 |
| 629 AT2G05620.1   Symbol: PGR5   expressed protein   chr2:2081050-2081837 REVERSE   Aliases: T20G20.3, T20G20_3                                                                                                                                                                                                                                               | 8.8 | 4.5 | 4.3  | 11.1 |
| 4428 AT2G47790.1   transducin family protein / WD-40 repeat family protein, similar to WD-repeat protein 5 (SP:Q9UGP9) (Homo sapiens); The first 3 exons are identical to that of GB:AJ224957. This gene appears to be a truncated version of that in GB:AJ224957; contains 4 WD-40 repeats (PF00400)   chr2:19577641-19580086 REVERSE   Aliases: F17A22.18   | 8.8 | 6.8 | 2.0  | 4.9  |
| 17405 AT4G39240.1   kelch repeat-containing F-box family protein, similar to SKP1 interacting partner 6 (Arabidopsis thaliana) GI:10716957; contains Pfam profiles PF01344: Kelch motif, PF00646: F-box domain   chr4:18269151-18270781 REVERSE   Aliases: T22F8.140, T22F8_140                                                                               | 8.8 | 8.6 | 0.1  | 0.7  |
| 4815 AT5G01710.1   expressed protein   chr5:263516-265613 REVERSE   Aliases: F7A7.230, F7A7_230                                                                                                                                                                                                                                                               | 8.8 | 9.6 | -0.9 | -4.7 |
| 20403 AT5G40250.1   zinc finger (C3HC4-type RING finger) family protein, similar to RING-H2 finger protein RHX1a (Arabidopsis thaliana) GI:3790591; contains Pfam profile PF00097: Zinc finger, C3HC4 type (RING finger)   chr5:16103284-16104414 FORWARD   Aliases: MSN9.150, MSN9_150                                                                       | 8.8 | 8.8 | -0.0 | -0.1 |
| 1664 AT1G55805.1   BolA-like family protein, contains Pfam profile: PF01722 BolA-like protein   chr1:20862397-20863105 REVERSE   Aliases: None                                                                                                                                                                                                                | 8.8 | 5.6 | 3.2  | 7.9  |
| 11878 AT5G35330.2   Symbol: MBD02   methyl-CpG-binding domain-containing protein, similar to methyl-CpG binding protein MBD4 (Mus musculus) GI:3800807; contains Pfam profile PF01429: Methyl-CpG binding domain   chr5:13540710-13542990 REVERSE   Aliases: MBD2, T26D22.18, T26D22_18                                                                       | 8.8 | 8.2 | 0.5  | 1.8  |
| 8723 AT3G54300.1   Symbol: ATVAMP727   synaptobrevin family protein, similar to vesicle-associated membrane protein 7B (At VAMP7B), Arabidopsis thaliana, EMBL:AF025333   chr3:20119187-20121624 REVERSE   Aliases: F24B22.260, VAMP727                                                                                                                       | 8.8 | 7.1 | 1.6  | 2.8  |
| 17787 AT4G22150.1   Symbol: pux3   UBX domain-containing protein, similar to XY40 protein (Rattus norvegicus) GI:2547025; contains Pfam profile PF00789: UBX domain                                                                                                                                                                                           | 8.8 | 8.9 | -0.2 | -0.6 |
| 2659 AT1G64750.2   DSS1/SEM1 family protein, contains Pfam profile PF05160: DSS1/SEM1 family   chr1:24056244-24057568 REVERSE   Aliases: F13O11.6, F13O11_6                                                                                                                                                                                                   | 8.8 | 6.6 | 2.1  | 6.5  |



|                                                                                                                                                                                                                                                                                                                                                                                                                                                  |     |      |      |      |
|--------------------------------------------------------------------------------------------------------------------------------------------------------------------------------------------------------------------------------------------------------------------------------------------------------------------------------------------------------------------------------------------------------------------------------------------------|-----|------|------|------|
| 462 AT2G28950.1   Symbol: ATEXPA6   expansin, putative (EXP6), similar to expansin GI:2828241 from (Brassica napus); contains Pfam profile PF01357: Pollen allergen   chr2:12438418-12440672 REVERSE   Aliases: ARABIDOPSIS THALIANA EXPANSIN A6, ATEXP6, ATHEXP ALPHA 1.8, EXPANSIN 6, T9I4.3, T9I4_3                                                                                                                                           | 8.8 | 2.8  | 5.9  | 12.2 |
| 2088 AT3G21420.1   oxidoreductase, 2OG-Fe(II) oxygenase family protein, similar to SP:Q9ZWQ9 Flavonol synthase (EC 1.14.11.-) {Citrus unshiu}; contains Pfam profile PF03171: oxidoreductase, 2OG-Fe(II) oxygenase family   chr3:7541509-7543524 FORWARD   Aliases: MHC9.10                                                                                                                                                                      | 8.8 | 5.7  | 3.0  | 7.2  |
| 1582 AT1G07430.1   protein phosphatase 2C, putative / PP2C, putative, similar to GB:CAB90633 from (Fagus sylvatica)                                                                                                                                                                                                                                                                                                                              | 8.8 | 4.2  | 4.6  | 8.1  |
| 5855 AT1G68660.1   expressed protein   chr1:25781514-25782824 REVERSE   Aliases: F24J5.10, F24J5_10                                                                                                                                                                                                                                                                                                                                              | 8.8 | 7.6  | 1.2  | 4.1  |
| 14971 AT4G01320.1   Symbol: ATSTE24   CAAX protease, putative (STE24), contains Pfam domain, PF01435: Peptidase family M48   chr4:545796-549261 FORWARD   Aliases: ATSTE24, F2N1.21, F2N1_21, STE24                                                                                                                                                                                                                                              | 8.8 | 8.4  | 0.3  | 1.2  |
| 4507 AT5G39740.1   60S ribosomal protein L5 (RPL5B), ribosomal protein L5, rice   chr5:15920551-15922688 FORWARD   Aliases: MKM21.30, MKM21_30                                                                                                                                                                                                                                                                                                   | 8.8 | 5.6  | 3.2  | 4.9  |
| 12631 AT5G24980.1   expressed protein   chr5:8609084-8609531 FORWARD   Aliases: F6A4.190, F6A4_190                                                                                                                                                                                                                                                                                                                                               | 8.8 | 7.8  | 0.9  | 1.7  |
| 17486 AT3G44140.1   expressed protein   chr3:15896064-15896367 REVERSE   Aliases: F26G5.90                                                                                                                                                                                                                                                                                                                                                       | 8.8 | 8.9  | -0.2 | -0.7 |
| 1530 AT3G26890.3   expressed protein, similar to expressed protein [Arabidopsis thaliana] (TAIR:At5g41110.1); similar to unknown protein [Oryza sativa (japonica cultivar-group)] (GB:XP_483533.1)   chr3:9908499-9912853 REVERSE   Aliases: MDJ14.23                                                                                                                                                                                            | 8.7 | 9.5  | -0.8 | -8.2 |
| 12643 AT5G64370.1   Symbol: PYD3   PYD3 encodes a beta-ureidopropionase which, when expressed in E. coli, has been shown to convert beta-ureidopropionate into beta-alanine.   chr5:25756441-25758438 FORWARD   Aliases: MSJ1.21, MSJ1_21, PYD3                                                                                                                                                                                                  | 8.7 | 9.6  | -0.8 | -1.7 |
| 17517 AT5G17330.1   Symbol: GAD   glutamate decarboxylase 1 (GAD 1), sp:Q42521   chr5:5711070-5715077 FORWARD   Aliases: GAD1, GLUTAMATE DECARBOXYLASE, MKP11.30, MKP11_30                                                                                                                                                                                                                                                                       | 8.7 | 9.2  | -0.5 | -0.7 |
| 11679 AT5G04870.1   Symbol: CPK1   calcium-dependent protein kinase isoform AK1 (AK1), identical to calcium-dependent protein kinase, isoform AK1 (CDPK) (Arabidopsis thaliana) SWISS-PROT:Q06850; contains protein kinase domain, Pfam:PF00069; contains EF hand domain (calcium-binding EF-hand), Pfam:PF00036, INTERPRO:IPR002048   chr5:1416784-1420339 REVERSE   Aliases: AK1, ATCPK1, CALCIUM DEPENDENT PROTEIN KINASE, MUK11.19, MUK11_19 | 8.7 | 8.3  | 0.4  | 1.9  |
| 8727 AT2G31040.1   ATP synthase protein I -related, contains weak similarity to Swiss-Prot:P08443 ATP synthase protein I (Synechococcus sp.)   chr2:13215983-13218162 REVERSE   Aliases: T16B12.15, T16B12_15                                                                                                                                                                                                                                    | 8.7 | 8.0  | 0.8  | 2.8  |
| 692 AT4G10270.1   wound-responsive family protein, similar to wound induced protein (GI:19320) (Lycopersicon esculentum)   chr4:6374730-6375206 FORWARD   Aliases: T9A4.6                                                                                                                                                                                                                                                                        | 8.7 | 4.2  | 4.6  | 10.8 |
| 18771 AT5G55850.1   Symbol: NOI   similar to nitrate-responsive NOI protein, putative [Arabidopsis thaliana] (TAIR:At5g63270.1); similar to nitrate-induced NOI protein [Zea mays] (GB:AAC03022.1); contains InterPro domain Nitrate-induced NOI (InterPro:IPR008700)   chr5:22620603-22622458 FORWARD   Aliases: MWJ3.3, MWJ3_3, NOI PROTEIN                                                                                                    | 8.7 | 8.6  | 0.1  | 0.4  |
| 8190 AT3G29180.1   expressed protein   chr3:11149452-11152797 FORWARD   Aliases: MUO22.2                                                                                                                                                                                                                                                                                                                                                         | 8.7 | 8.1  | 0.7  | 3.0  |
| 2435 AT2G24360.1   serine/threonine/tyrosine kinase, putative, similar to serine/threonine/tyrosine kinase (Arachis hypogaea) gi:13124865:gb:AAK11734   chr2:10371531-10373971 REVERSE   Aliases: T28I24.9, T28I24_9                                                                                                                                                                                                                             | 8.7 | 10.0 | -1.3 | -6.8 |
| 10180 AT4G27040.1   expressed protein   chr4:13572444-13575544 REVERSE   Aliases: F10M23.380, F10M23_380                                                                                                                                                                                                                                                                                                                                         | 8.7 | 9.2  | -0.4 | -2.3 |
| 543 AT1G50450.1   expressed protein   chr1:18691453-18694039 REVERSE   Aliases: F11F12.19, F11F12_19                                                                                                                                                                                                                                                                                                                                             | 8.7 | 4.2  | 4.5  | 11.7 |
| 6272 AT4G34200.1   D-3-phosphoglycerate dehydrogenase, putative / 3-PGDH, putative, similar to phosphoglycerate dehydrogenase, Arabidopsis thaliana, SP:O04130   chr4:16373850-16376626 REVERSE   Aliases: F10M10.7                                                                                                                                                                                                                              | 8.7 | 6.0  | 2.7  | 3.9  |
| 11429 AT4G27800.3   protein phosphatase 2C PPH1 / PP2C PPH1 (PPH1), identical to SP:P49599:P2C3_ARATH Protein phosphatase 2C PPH1 (EC 3.1.3.16) (PP2C) {Arabidopsis thaliana}; similar to protein phosphatase-2C; PP2C (GI:3643090) (Mesembryanthemum crystallinum)   chr4:13851876-13854197 REVERSE   Aliases: T27E11.40, T27E11_40                                                                                                             | 8.7 | 8.4  | 0.3  | 2.0  |
| 12478 AT1G07510.1   Symbol: FTSH10                                                                                                                                                                                                                                                                                                                                                                                                               | 8.7 | 9.2  | -0.5 | -1.7 |
| 6243 AT1G10840.2   Symbol: TIF3H1                                                                                                                                                                                                                                                                                                                                                                                                                | 8.7 | 7.5  | 1.2  | 3.9  |

|                                                                                                                                                                                                                                                                                                                                                                                                                             |     |      |      |      |
|-----------------------------------------------------------------------------------------------------------------------------------------------------------------------------------------------------------------------------------------------------------------------------------------------------------------------------------------------------------------------------------------------------------------------------|-----|------|------|------|
| 15202 AT5G10540.1   peptidase M3 family protein / thimet oligopeptidase family protein, similar to SP:P27237 Oligopeptidase A (EC 3.4.24.70) {Salmonella typhimurium}; contains Pfam profile PF01432: Peptidase family M3   chr5:3328093-3334972 FORWARD   Aliases: F12B17.110, F12B17_110                                                                                                                                  | 8.7 | 8.3  | 0.5  | 1.1  |
| 1736 AT1G62380.1   Symbol: ACO2   1-aminocyclopropane-1-carboxylate oxidase, putative / ACC oxidase, putative, nearly identical to ACC oxidase (ACC ox1) GI:587086 from (Brassica oleracea)   chr1:23085927-23087918 FORWARD   Aliases: ACC OXIDASE, ACC OXIDASE 2, ATACO2, F24O1.40, F24O1_40                                                                                                                              | 8.7 | 12.1 | -3.3 | -7.8 |
| 16895 AT3G42790.1   PHD finger family protein, contains PHD-finger domain, INTERPRO:IPR001965   chr3:14888946-14890755 REVERSE   Aliases: T21C14.10                                                                                                                                                                                                                                                                         | 8.7 | 8.5  | 0.2  | 0.8  |
| 7120 AT5G53540.1   MSP1 protein, putative / intramitochondrial sorting protein, putative, similar to Swiss-Prot:P28737 MSP1 protein (TAT-binding homolog 4) (Saccharomyces cerevisiae); contains Pfam domain, PF00004: ATPase, AAA family   chr5:21766512-21768463 REVERSE   Aliases: MNC6.8, MNC6_8                                                                                                                        | 8.7 | 8.1  | 0.6  | 3.5  |
| 1013 AT4G38490.1   expressed protein   chr4:18006282-18007366 FORWARD   Aliases: F20M13.50, F20M13_50                                                                                                                                                                                                                                                                                                                       | 8.7 | 6.9  | 1.9  | 9.5  |
| 8013 AT2G30500.1   kinase interacting family protein, similar to kinase interacting protein 1 (GI:13936326) (Petunia integrifolia)   chr2:13005236-13007149 REVERSE   Aliases: T6B20.15, T6B20_15                                                                                                                                                                                                                           | 8.7 | 9.9  | -1.1 | -3.1 |
| 6595 AT5G12080.2   mechanosensitive ion channel domain-containing protein / MS ion channel domain-containing protein, contains Pfam profile PF00924: Mechanosensitive ion channel   chr5:3898048-3901521 REVERSE   Aliases: F14F18.230, F14F18_230                                                                                                                                                                          | 8.7 | 7.1  | 1.6  | 3.7  |
| 3273 AT1G09430.1   Symbol: ACLA 3                                                                                                                                                                                                                                                                                                                                                                                           | 8.7 | 10.3 | -1.6 | -5.8 |
| 9503 AT1G76930.2   Symbol: ATEXT4                                                                                                                                                                                                                                                                                                                                                                                           | 8.7 | 6.8  | 1.9  | 2.5  |
| 10296 AT2G31510.1   IBR domain-containing protein / ARIADNE-like protein ARI7 (ARI7), identical to ARIADNE-like protein ARI7 (Arabidopsis thaliana) GI:29125028; contains similarity to Swiss-Prot:Q94981 ariadne-1 protein (Ari-1) (Drosophila melanogaster); contains Pfam profile PF01485: IBR domain   chr2:13423764-13428247 REVERSE   Aliases: T9H9.3, T9H9_3                                                         | 8.7 | 9.5  | -0.8 | -2.3 |
| 4599 AT1G08450.2   Symbol: CRT3   calreticulin 3 (CRT3), identical to similar to SP:O04153 Calreticulin 3 precursor {Arabidopsis thaliana}                                                                                                                                                                                                                                                                                  | 8.7 | 7.7  | 1.0  | 4.8  |
| 4852 AT2G33590.1   cinnamoyl-CoA reductase family, similar to cinnamoyl-CoA reductase from Pinus taeda (GI:17978649), Eucalyptus gunnii (GI:2058311)   chr2:14231344-14233678 FORWARD   Aliases: F4P9.36, F4P9_36                                                                                                                                                                                                           | 8.7 | 6.5  | 2.2  | 4.7  |
| 13813 AT4G04610.1   Symbol: APR1   5'-adenylylsulfate reductase (APR1) / PAPS reductase homolog (PRH19), identical to 5'-adenylylsulfate reductase (Arabidopsis thaliana) GI:2738756; identical to cDNA PAPS reductase homolog (PRH19) GI:1710111   chr4:2325001-2327011 FORWARD   Aliases: 3' PHOSPHOADENOSINE 5' PHOSPHOSULFATE REDUCTASE, APR, APS REDUCTASE, ATAPR1, F4H6.13, F4H6_13, PAPS REDUCTASE HOMOLOG 19, PRH19 | 8.7 | 8.1  | 0.6  | 1.4  |
| 5313 AT1G79050.1   DNA repair protein recA, identical to DNA repair protein recA, chloroplast (Precursor) SP:Q39199 from (Arabidopsis thaliana) ;contains Pfam profile: PF00154 recA bacterial DNA recombination protein   chr1:29741854-29745049 REVERSE   Aliases: YUP8H12R.33, YUP8H12R_33                                                                                                                               | 8.7 | 7.0  | 1.7  | 4.4  |
| 1239 AT5G47110.1   lil3 protein, putative, similar to Lil3 protein (Arabidopsis thaliana) gi:4741966:gb:AAD28780   chr5:19151215-19152544 REVERSE   Aliases: K14A3.6, K14A3_6                                                                                                                                                                                                                                               | 8.7 | 5.9  | 2.8  | 8.9  |
| 3300 AT5G48240.1   expressed protein, similar to hypothetical protein [Oryza sativa (japonica cultivar-group)] (GB:AAX96070.1)   chr5:19576469-19578464 FORWARD   Aliases: MIF21.13, MIF21_13                                                                                                                                                                                                                               | 8.7 | 6.6  | 2.1  | 5.8  |
| 1563 AT1G51400.1   photosystem II 5 kD protein, 100% identical to GI:4836947 (F5D21.10)   chr1:19055730-19056250 REVERSE   Aliases: F5D21.10, F5D21_10                                                                                                                                                                                                                                                                      | 8.7 | 5.3  | 3.4  | 8.1  |
| 8712 AT5G26610.2   D111/G-patch domain-containing protein, contains Pfam PF01585: G-patch domain   chr5:9375256-9377128 FORWARD   Aliases: None                                                                                                                                                                                                                                                                             | 8.7 | 9.4  | -0.7 | -2.8 |
| 11013 AT3G07800.1   thymidine kinase, putative, similar to thymidine kinase (Oryza sativa) SWISS-PROT:O81263                                                                                                                                                                                                                                                                                                                | 8.7 | 7.9  | 0.8  | 2.1  |
| 2899 AT4G13660.1   pinorelinol-lariciresinol reductase, putative, similar to pinorelinol-lariciresinol reductase TH1 (Tsuga heterophylla)(GI:7578915); contains isoflavone reductase domain PF02716                                                                                                                                                                                                                         | 8.7 | 11.0 | -2.3 | -6.2 |
| 12245 AT3G54840.1   Symbol: ARA6   Rab GTPase (ARA6), identical to small GTPase Ara6 (Arabidopsis thaliana) GI:13160603   chr3:20329480-20331970 FORWARD   Aliases: F28P10.180                                                                                                                                                                                                                                              | 8.7 | 7.5  | 1.2  | 1.8  |
| 7623 AT4G12040.2   zinc finger (AN1-like) family protein, contains Pfam domains, PF01428: AN1-like Zinc finger and PF01754: A20-like zinc finger   chr4:7214704-7215979 FORWARD   Aliases: F16J13.110, F16J13_110                                                                                                                                                                                                           | 8.7 | 9.8  | -1.1 | -3.3 |
| 2996 AT3G23690.1   basic helix-loop-helix (bHLH) family protein, contains Pfam profile: PF00010 helix-loop-helix DNA-binding domain                                                                                                                                                                                                                                                                                         | 8.7 | 7.7  | 1.1  | 6.1  |

|                   |                                                                                                                                                                                                                                                                                                                                                                                                         |     |      |      |      |
|-------------------|---------------------------------------------------------------------------------------------------------------------------------------------------------------------------------------------------------------------------------------------------------------------------------------------------------------------------------------------------------------------------------------------------------|-----|------|------|------|
| 1698 AT5G62670.1  | ATPase, plasma membrane-type, putative / proton pump, putative, strong similarity to P-type H(+)-transporting ATPase from <i>Nicotiana plumbaginifolia</i> (SP:Q08435, SP:Q08436), <i>Lycopersicon esculentum</i> (GI:5901757, SP:P22180), <i>Solanum tuberosum</i> (GI:435003); contains InterPro accession IPR001757: ATPase, E1-E2 type   chr5:25176456-25183574 FORWARD   Aliases: MRG21.9, MRG21_9 | 8.7 | 5.3  | 3.4  | 7.9  |
| 5716 AT1G30880.1  | expressed protein, similar to ESTs gb:R30049 and gb:T46176   chr1:10993215-10994100 REVERSE   Aliases: F17F8.25                                                                                                                                                                                                                                                                                         | 8.7 | 6.9  | 1.8  | 4.2  |
| 772 AT4G10300.1   | expressed protein   chr4:6384458-6386185 FORWARD   Aliases: T9A4.16                                                                                                                                                                                                                                                                                                                                     | 8.7 | 5.5  | 3.2  | 10.4 |
| 1788 AT2G41220.1  | Symbol: GLU2   glutamate synthase, chloroplast (GLU2) / ferredoxin-dependent glutamate synthase (Fd-GOGAT 2), identical to SP:Q9T0P4 Ferredoxin-dependent glutamate synthase 2, chloroplast precursor (EC 1.4.7.1) (Fd-GOGAT 2) { <i>Arabidopsis thaliana</i> }   chr2:17185012-17195829 FORWARD   Aliases: F13H10.23, F13H10_23, GLUTAMATE SYNTHASE PRECURSOR                                          | 8.7 | 10.8 | -2.1 | -7.7 |
| 9683 AT2G46490.1  | expressed protein (APS2), identical to cDNA Aps2, partial cds GI:4519894                                                                                                                                                                                                                                                                                                                                | 8.7 | 7.4  | 1.3  | 2.5  |
| 7942 AT2G04400.1  | indole-3-glycerol phosphate synthase (IGPS), nearly identical to SP:P49572   chr2:1531159-1534041 FORWARD   Aliases: T1O3.19, T1O3_19                                                                                                                                                                                                                                                                   | 8.7 | 7.4  | 1.3  | 3.1  |
| 985 AT3G11500.1   | small nuclear ribonucleoprotein G, putative / snRNP-G, putative / Sm protein G, putative, similar to SWISS-PROT:Q15357 small nuclear ribonucleoprotein G (snRNP-G, Sm protein G, Sm-G, SmG) ( <i>Homo sapiens</i> )   chr3:3621415-3622598 REVERSE   Aliases: F24K9.17                                                                                                                                  | 8.7 | 6.9  | 1.8  | 9.6  |
| 607 AT2G29670.1   | expressed protein   chr2:12689221-12692164 REVERSE   Aliases: T27A16.23, T27A16_23                                                                                                                                                                                                                                                                                                                      | 8.7 | 4.9  | 3.8  | 11.3 |
| 4229 AT5G43260.1  | chaperone protein dnaJ-related, similar to Chaperone protein dnaJ (SP:Q9WZV3) ( <i>Thermotoga maritima</i> )   chr5:17374615-17375310 REVERSE   Aliases: MNL12.8, MNL12_8                                                                                                                                                                                                                               | 8.7 | 7.4  | 1.3  | 5.1  |
| 3480 AT5G16040.1  | regulator of chromosome condensation (RCC1) family protein, similar to UVB-resistance protein UVR8 ( <i>Arabidopsis thaliana</i> ) GI:5478530; contains Pfam profile PF00415: Regulator of chromosome condensation (RCC1)                                                                                                                                                                               | 8.7 | 6.6  | 2.1  | 5.7  |
| 8354 AT3G10850.1  | Symbol: GLX2 2                                                                                                                                                                                                                                                                                                                                                                                          | 8.7 | 7.0  | 1.7  | 3.0  |
| 10764 AT4G32910.1 | expressed protein   chr4:15881259-15885390 FORWARD   Aliases: F26P21.30, F26P21_30                                                                                                                                                                                                                                                                                                                      | 8.7 | 8.1  | 0.6  | 2.1  |
| 7597 AT4G17620.2  | similar to glycine-rich protein [ <i>Arabidopsis thaliana</i> ] (TAIR:At4g30460.1); similar to glycine-rich protein [ <i>Haloxylon ammodendron</i> ] (GB:AAS99237.1); contains domain GLY_RICH (PS50315); contains domain SER_RICH (PS50324)   chr4:9821927-9825019 FORWARD   Aliases: DL4845W, FCAALL.74                                                                                               | 8.7 | 9.4  | -0.7 | -3.3 |
| 366 AT1G17100.1   | SOUL heme-binding family protein, similar to SOUL protein ( <i>Mus musculus</i> ) GI:4886906; contains Pfam profile PF04832: SOUL heme-binding protein   chr1:5844729-5846215 FORWARD   Aliases: F20D23.21, F20D23_21                                                                                                                                                                                   | 8.7 | 5.7  | 3.0  | 13.3 |
| 4828 AT4G10750.1  | HpcH/Hpal aldolase family protein, similar to 2,4-dihydroxydec-2-ene-1,10-dioic acid aldolase ( <i>Sphingopyxis macrogoltabida</i> ) GI:23330203; contains Pfam profile PF03328: HpcH/Hpal aldolase family   chr4:6618672-6619935 FORWARD   Aliases: T12H20.10, T12H20_10                                                                                                                               | 8.7 | 7.3  | 1.4  | 4.7  |
| 2926 AT3G54210.1  | ribosomal protein L17 family protein, contains Pfam profile: PF01196 ribosomal protein L17   chr3:20078525-20079413 REVERSE   Aliases: F24B22.170                                                                                                                                                                                                                                                       | 8.7 | 6.2  | 2.4  | 6.2  |
| 1725 AT1G17490.1  | expressed protein   chr1:6008582-6009409 FORWARD   Aliases: F28G4.23                                                                                                                                                                                                                                                                                                                                    | 8.7 | 7.5  | 1.2  | 7.8  |
| 18974 AT2G34590.1 | transketolase family protein, similar to SP:O66113 Pyruvate dehydrogenase E1 component, beta subunit (EC 1.2.4.1). { <i>Zymomonas mobilis</i> }; contains Pfam profiles PF02779: Transketolase, pyridine binding domain, PF02780: Transketolase, C-terminal domain   chr2:14575890-14578048 REVERSE   Aliases: T31E10.7, T31E10_7                                                                       | 8.7 | 8.8  | -0.1 | -0.4 |
| 1020 AT4G35850.1  | pentatricopeptide (PPR) repeat-containing protein, low similarity to CRP1 ( <i>Zea mays</i> ) GI:3289002; contains Pfam profile PF01535: PPR repeat   chr4:16983528-16987203 FORWARD   Aliases: F4B14.120, F4B14_120                                                                                                                                                                                    | 8.7 | 4.8  | 3.9  | 9.5  |
| 4364 AT5G24490.1  | 30S ribosomal protein, putative, similar to SP:P19954 Plastid-specific 30S ribosomal protein 1, chloroplast precursor (CS-S5) (CS5) (S22) (Ribosomal protein 1) (PSRP-1) { <i>Spinacia oleracea</i> }; contains Pfam profile PF02482: Sigma 54 modulation protein / S30EA ribosomal protein   chr5:8365624-8367429 FORWARD   Aliases: T31K7.7, T31K7_7                                                  | 8.7 | 7.4  | 1.3  | 5.0  |
| 6953 AT5G40960.1  | expressed protein   chr5:16429973-16430179 REVERSE   Aliases: MEE6.3, MEE6_3                                                                                                                                                                                                                                                                                                                            | 8.7 | 7.4  | 1.3  | 3.6  |
| 8202 AT1G02330.1  | expressed protein, contains similarity to hepatocellular carcinoma-associated antigen 59 GI:7158847 from ( <i>Homo sapiens</i> )   chr1:462081-463612 REVERSE   Aliases: T6A9.2, T6A9_2                                                                                                                                                                                                                 | 8.7 | 7.8  | 0.9  | 3.0  |



|                                                                                                                                                                                                                                                                                                                                                                                                     |     |      |      |      |
|-----------------------------------------------------------------------------------------------------------------------------------------------------------------------------------------------------------------------------------------------------------------------------------------------------------------------------------------------------------------------------------------------------|-----|------|------|------|
| 16526 AT1G03920.1   protein kinase, putative, contains protein kinase domain, Pfam:PF00069   chr1:1001320-1004382 FORWARD   Aliases: F21M11.15, F21M11_15                                                                                                                                                                                                                                           | 8.7 | 8.3  | 0.4  | 0.9  |
| 1138 AT4G02610.1   tryptophan synthase, alpha subunit, putative, similar to A. thaliana tryptophan synthase alpha chain (EC 4.2.1.20), GenBank accession number U18993 (gi:619753)   chr4:1147634-1149577 FORWARD   Aliases: T10P11.11, T10P11_11                                                                                                                                                   | 8.7 | 5.4  | 3.3  | 9.1  |
| 18865 AT5G38830.1   tRNA synthetase class I (C) family protein, similar to SP:Q06752 Cysteinyl-tRNA synthetase (EC 6.1.1.16) (Cysteine--tRNA ligase) (CysRS) {Bacillus subtilis}; contains Pfam profile PF01406: tRNA synthetases class I (C)   chr5:15562994-15565382 REVERSE   Aliases: K15E6.3, K15E6_3                                                                                          | 8.7 | 8.5  | 0.1  | 0.4  |
| 8716 AT3G07480.1   expressed protein   chr3:2388958-2389817 FORWARD   Aliases: F21O3.19                                                                                                                                                                                                                                                                                                             | 8.7 | 6.9  | 1.8  | 2.8  |
| 19730 AT5G46630.2   clathrin adaptor complexes medium subunit family protein, contains Pfam profile: PF00928 adaptor complexes medium subunit family                                                                                                                                                                                                                                                | 8.7 | 8.6  | 0.1  | 0.3  |
| 7159 AT1G80070.1   Symbol: SUS2   splicing factor, putative, strong similarity to splicing factor Prp8 (Homo sapiens) GI:3661610; contains Pfam profile PF01398: Mov34/MPN/PAD-1 family   chr1:30122945-30132704 FORWARD   Aliases: ABNORMAL SUSPENSOR 2, EMB14, EMB158, EMB177, EMB33, EMBRYO DEFECTIVE 14, EMBRYO DEFECTIVE 177, EMBRYO DEFECTIVE 33, F18B13.15, F18B13_15                        | 8.7 | 7.5  | 1.2  | 3.5  |
| 10124 AT2G42910.1   ribose-phosphate pyrophosphokinase 4 / phosphoribosyl diphosphate synthetase 4 (PRS4), identical to phosphoribosyl diphosphate synthase (prs4) (Arabidopsis thaliana) GI:4902472                                                                                                                                                                                                | 8.7 | 6.8  | 1.9  | 2.3  |
| 8936 AT1G70370.1   BURP domain-containing protein / polygalacturonase, putative, similar to polygalacturonase isoenzyme 1 beta subunit (Lycopersicon esculentum) GI:170480; contains Pfam profile PF03181: BURP domain   chr1:26516385-26518851 REVERSE   Aliases: F17O7.9, F17O7_9                                                                                                                 | 8.7 | 9.2  | -0.6 | -2.7 |
| 8832 AT1G79750.1   malate oxidoreductase, putative, similar to malate oxidoreductase (NADP-dependent malic enzyme) GB:P34105 (Populus balsamifera subsp. trichocarpa)   chr1:30012219-30016279 REVERSE   Aliases: F19K16.27, F19K16_27                                                                                                                                                              | 8.7 | 7.7  | 1.0  | 2.8  |
| 11791 AT1G52600.1   signal peptidase, putative, similar to SP:P13679 Microsomal signal peptidase 21 kDa subunit (EC 3.4.-.-) {Canis familiaris}; contains Pfam profile PF00461: Signal peptidase I   chr1:19594194-19596343 FORWARD   Aliases: F6D8.18, F6D8_18                                                                                                                                     | 8.7 | 8.2  | 0.5  | 1.9  |
| 20589 AT1G08700.1   presenilin family protein, similar to SP:P52166 Presenilin sel-12 {Caenorhabditis elegans}; contains Pfam profile PF01080: Presenilin   chr1:2769818-2771480 REVERSE   Aliases: F22O13.18, F22O13_18                                                                                                                                                                            | 8.7 | 8.7  | -0.0 | -0.1 |
| 389 AT4G27380.1   expressed protein   chr4:13701262-13703156 FORWARD   Aliases: F27G19.4                                                                                                                                                                                                                                                                                                            | 8.7 | 4.1  | 4.5  | 13.0 |
| 3809 AT2G30150.1   UDP-glucuronosyl/UDP-glucosyl transferase family protein, contains Pfam profile: PF00201 UDP-glucuronosyl and UDP-glucosyl transferase   chr2:12881783-12883199 FORWARD   Aliases: T27E13.11, T27E13_11                                                                                                                                                                          | 8.7 | 7.1  | 1.6  | 5.4  |
| 3392 AT5G51280.1   DEAD-box protein abstrakt, putative   chr5:20858474-20861032 FORWARD   Aliases: MWD22.23, MWD22_23                                                                                                                                                                                                                                                                               | 8.7 | 7.1  | 1.6  | 5.7  |
| 6910 AT1G48140.1   dolichol-phosphate mannosyltransferase-related, contains weak similarity to Swiss-Prot:Q9P2X0 dolichol-phosphate mannosyltransferase subunit 3 (Dolichol-phosphate mannose synthase subunit 3, Dolichyl-phosphate beta-D- mannosyltransferase subunit 3, Mannose-P-dolichol synthase subunit 3, MPD synthase subunit 3, DPM synthase complex subunit 3, Prostin 1 (Homo sapiens) | 8.7 | 7.8  | 0.8  | 3.6  |
| 4761 AT1G60440.1   eukaryotic pantothenate kinase family protein, similar to pantothenate kinase GI:4191500 from (Aspergillus nidulans); contains Pfam profile PF03630: Fumble   chr1:22270175-22272906 REVERSE   Aliases: T13D8.31, T13D8_31                                                                                                                                                       | 8.7 | 9.2  | -0.6 | -4.7 |
| 2887 AT4G25100.4   Symbol: FSD1   similar to superoxide dismutase (Fe), putative / iron superoxide dismutase, putative [Arabidopsis thaliana] (TAIR:At5g51100.1); similar to Fe-superoxide dismutase (GB:AAA32791.1); contains InterPro domain Manganese and iron superoxide dismutase (InterPro:IPR001189)   chr4:12884310-12886537 REVERSE   Aliases: F24A6.1, FE SUPEROXIDE DISMUTASE 1          | 8.7 | 4.4  | 4.3  | 6.3  |
| 3487 AT2G36290.1   hydrolase, alpha/beta fold family protein, low similarity to 2-hydroxy-6-oxo-6-phenylhexa-2,4-dienoate hydrolase (Rhodococcus sp. RHA1) GI:8978311; contains Pfam profile PF00561: hydrolase, alpha/beta fold family   chr2:15215706-15217918 REVERSE   Aliases: F2H17.10, F2H17_10                                                                                              | 8.7 | 10.4 | -1.8 | -5.7 |
| 19114 AT2G44820.2   expressed protein   chr2:18491426-18492885 FORWARD   Aliases: F16B22.34, F16B22_34                                                                                                                                                                                                                                                                                              | 8.7 | 8.4  | 0.2  | 0.4  |
| 3640 AT1G24280.1   Symbol: G6PD3   Encodes a plastidic glucose-6-phosphate dehydrogenase that is sensitive to reduction by DTT and whose mRNA is most highly expressed in root.   chr1:8609434-8612569 FORWARD   Aliases: F3I6.22, F3I6_22, G6PD3, GLUCOSE 6 PHOSPHATE DEHYDROGENASE 3                                                                                                              | 8.7 | 9.8  | -1.1 | -5.5 |
| 966 AT1G34370.3   similar to zinc finger (C2H2 type) family protein [Arabidopsis thaliana] (TAIR:At5g22890.1); similar to putative zinc finger protein [Oryza sativa (japonica cultivar-group)] (GB:XP_470361.1); contains InterPro domain Zn-finger, C2H2 type (InterPro:IPR007087)   chr1:12550455-12552677 FORWARD   Aliases: F7P12.7, F7P12_7                                                   | 8.7 | 11.1 | -2.4 | -9.6 |

|                   |                                                                                                                                                                                                                                                                                                                                                                                                                                                                            |     |      |      |      |
|-------------------|----------------------------------------------------------------------------------------------------------------------------------------------------------------------------------------------------------------------------------------------------------------------------------------------------------------------------------------------------------------------------------------------------------------------------------------------------------------------------|-----|------|------|------|
| 5016 AT3G04830.2  | expressed protein   chr3:1326255-1329370 FORWARD   Aliases: T9J14.22, T9J14_22                                                                                                                                                                                                                                                                                                                                                                                             | 8.7 | 6.5  | 2.2  | 4.6  |
| 2314 AT3G16310.1  | mitotic phosphoprotein N' end (MPPN) family protein, contains Pfam profile PF05172: MPPN (Mitotic PhosphoProtein N' end) (rrm-like) domain   chr3:5526424-5528606 REVERSE   Aliases: MYA6.11                                                                                                                                                                                                                                                                               | 8.7 | 6.2  | 2.4  | 6.9  |
| 9818 AT1G72360.1  | encodes a member of the ERF (ethylene response factor) subfamily B-2 of ERF/AP2 transcription factor family. The protein contains one AP2 domain. There are 5 members in this subfamily including RAP2.2 AND RAP2.12.   chr1:27245474-27246489 FORWARD   Aliases: T10D10.17, T10D10_17                                                                                                                                                                                     | 8.7 | 9.7  | -1.0 | -2.4 |
| 19582 AT5G05790.1 | myb family transcription factor, contains Pfam profile: PF00249 myb-like DNA-binding domain   chr5:1740573-1742029 REVERSE   Aliases: MJJ3.20, MJJ3_20                                                                                                                                                                                                                                                                                                                     | 8.7 | 8.7  | -0.1 | -0.3 |
| 1825 AT5G53420.2  | similar to expressed protein [Arabidopsis thaliana] (TAIR:At4g27900.1); similar to expressed protein [Arabidopsis thaliana] (TAIR:At4g27900.2); similar to zinc finger CONSTANS-like protein [Oryza sativa (japonica cultivar-group)] (GB:BAD73395.1)   chr5:21691615-21692959 FORWARD   Aliases: MYN8.3, MYN8_3                                                                                                                                                           | 8.7 | 6.6  | 2.0  | 7.7  |
| 6547 AT4G00570.1  | malate oxidoreductase, putative, similar to NAD-dependent malic enzyme 59 kDa isoform, mitochondrial precursor (EC 1.1.1.39) (NAD-ME) (SP:P37225) {Solanum tuberosum}   chr4:242516-246736 REVERSE   Aliases: F6N23.16, F6N23_16                                                                                                                                                                                                                                           | 8.7 | 7.4  | 1.3  | 3.7  |
| 18853 AT3G54540.1 | Symbol: ATGCN4                                                                                                                                                                                                                                                                                                                                                                                                                                                             | 8.7 | 8.8  | -0.1 | -0.4 |
| 9004 AT1G52730.2  | transducin family protein / WD-40 repeat family protein, contains 7 WD-40 repeats (PF00400); similar to UNR-interacting protein (WD-40 repeat protein PT-WD) (SP:Q9Y3F4) (Homo sapiens)   chr1:19646158-19648802 FORWARD   Aliases: F6D8.2, F6D8_2                                                                                                                                                                                                                         | 8.7 | 9.1  | -0.5 | -2.7 |
| 17539 AT1G68500.1 | expressed protein   chr1:25705666-25706174 FORWARD   Aliases: T26J14.7, T26J14_7                                                                                                                                                                                                                                                                                                                                                                                           | 8.6 | 8.4  | 0.3  | 0.7  |
| 12084 AT2G35880.1 | expressed protein   chr2:15070067-15072930 REVERSE   Aliases: F11F19.21, F11F19_21                                                                                                                                                                                                                                                                                                                                                                                         | 8.6 | 9.3  | -0.7 | -1.8 |
| 5873 AT5G16010.1  | 3-oxo-5-alpha-steroid 4-dehydrogenase family protein / steroid 5-alpha-reductase family protein, similar to steroid 5alpha-reductase - Rattus norvegicus, PIR:A34239 (SP:24008); contains Pfam 3-oxo-5-alpha-steroid 4-dehydrogenase domain PF02544   chr5:5227927-5229119 FORWARD   Aliases: F1N13.150, F1N13_150                                                                                                                                                         | 8.6 | 6.6  | 2.0  | 4.1  |
| 166 AT4G38370.1   | phosphoglycerate/bisphosphoglycerate mutase family protein, contains Pfam profile PF00300: phosphoglycerate mutase family   chr4:17969521-17971289 REVERSE   Aliases: F22I13.140, F22I13_140                                                                                                                                                                                                                                                                               | 8.6 | 3.5  | 5.2  | 17.3 |
| 8858 AT4G04040.1  | pyrophosphate--fructose-6-phosphate 1-phosphotransferase beta subunit, putative / pyrophosphate-dependent 6-phosphofructose-1-kinase, putative, strong similarity to SP:Q41141 Pyrophosphate--fructose 6-phosphate 1-phosphotransferase beta subunit (EC 2.7.1.90) (PFP) (6-phosphofructokinase, pyrophosphate-dependent) (Pyrophosphate-dependent 6-phosphofructose-1-kinase) (PPI-PFK) {Ricinus communis}   chr4:1939248-1942952 FORWARD   Aliases: T24H24.15, T24H24_15 | 8.6 | 9.2  | -0.5 | -2.8 |
| 4365 AT1G65580.1  | endonuclease/exonuclease/phosphatase family protein, similar to inositol polyphosphate 5-phosphatase II isoform (GI:15418718) (Mus musculus); contains 6 (5 weak) Pfam: Pf00400 WD domain, G-beta repeats and Pfam PF03372: Endonuclease/Exonuclease/phosphatase family   chr1:24380977-24387742 REVERSE   Aliases: F5I14.11, F5I14_11                                                                                                                                     | 8.6 | 9.9  | -1.3 | -5.0 |
| 455 AT4G16155.1   | dihydrolipoamide dehydrogenase 2, plastidic / lipoamide dehydrogenase 2 (PTLPD2), identical to plastidic lipoamide dehydrogenase from Arabidopsis thaliana (gi:7159284)   chr4:9153386-9157278 REVERSE   Aliases: None                                                                                                                                                                                                                                                     | 8.6 | 5.4  | 3.2  | 12.3 |
| 15661 AT5G43130.1 | similar to transcription initiation factor IID (TFIID) component TAF4 family protein [Arabidopsis thaliana] (TAIR:At1g27720.1); similar to putative protein [Oryza sativa] (GB:CAC39055.1); contains InterPro domain Transcription initiation factor TFIID component TAF4 (InterPro:IPR007900)   chr5:17332677-17338391 REVERSE   Aliases: MMG4.16, MMG4_16                                                                                                                | 8.6 | 9.0  | -0.3 | -1.0 |
| 15225 AT1G20050.1 | Symbol: HYD1   C-8,7 sterol isomerase, identical to C-8,7 sterol isomerase GI:11279073 from (Arabidopsis thaliana) (Plant Mol. Biol. 38 (5), 807-815 (1998))   chr1:6949060-6950310 FORWARD   Aliases: HYDRA1                                                                                                                                                                                                                                                              | 8.6 | 9.2  | -0.6 | -1.1 |
| 4740 AT1G19110.1  | inter-alpha-trypsin inhibitor heavy chain-related, similar to SP:Q61704 Inter-alpha-trypsin inhibitor heavy chain H3 precursor {Mus musculus}; contains Pfam profile PF00092: von Willebrand factor type A domain   chr1:6602117-6605899 FORWARD   Aliases: F14D16.26, F14D16_26                                                                                                                                                                                           | 8.6 | 9.4  | -0.8 | -4.7 |
| 17734 AT3G58600.1 | expressed protein, hypothetical protein F21M11.17 - Arabidopsis thaliana, EMBL:AC003027   chr3:21679173-21682140 REVERSE   Aliases: F14P22.190                                                                                                                                                                                                                                                                                                                             | 8.6 | 8.9  | -0.3 | -0.6 |
| 4009 AT2G42490.1  | copper amine oxidase, putative, similar to copper methylamine oxidase precursor (MAOXII) (Arthrobacter sp.) SWISS-PROT:Q07123   chr2:17698497-17702926 REVERSE   Aliases: MHK10.21, MHK10_21                                                                                                                                                                                                                                                                               | 8.6 | 10.1 | -1.4 | -5.3 |

|                                                                                                                                                                                                                                                                                                                                                                                                                                                                                 |     |      |      |      |
|---------------------------------------------------------------------------------------------------------------------------------------------------------------------------------------------------------------------------------------------------------------------------------------------------------------------------------------------------------------------------------------------------------------------------------------------------------------------------------|-----|------|------|------|
| 5107 AT4G14010.1   Symbol: RALFL32   rapid alkalization factor (RALF) family protein, similar to RALF precursor (Nicotiana tabacum) GI:16566316   chr4:8092832-8093377 REVERSE   Aliases: DL3045C, FCAALL.140, RALF LIKE 32                                                                                                                                                                                                                                                     | 8.6 | 9.8  | -1.1 | -4.5 |
| 5569 AT2G32580.1   expressed protein   chr2:13834740-13836386 FORWARD   Aliases: T26B15.14, T26B15_14                                                                                                                                                                                                                                                                                                                                                                           | 8.6 | 6.1  | 2.6  | 4.2  |
| 10670 AT5G66510.1   bacterial transferase hexapeptide repeat-containing protein, contains Pfam profile PF00132: Bacterial transferase hexapeptide (four repeats)   chr5:26566930-26568856 REVERSE   Aliases: K1F13.17, K1F13_17                                                                                                                                                                                                                                                 | 8.6 | 7.0  | 1.7  | 2.2  |
| 3416 AT4G35840.1   zinc finger (C3HC4-type RING finger) family protein, contains a TG non-consensus donor splice site at exon 2; contains Pfam profile PF00097: Zinc finger, C3HC4 type (RING finger)   chr4:16980965-16982368 FORWARD   Aliases: F4B14.110, F4B14_110                                                                                                                                                                                                          | 8.6 | 6.3  | 2.4  | 5.7  |
| 2814 AT4G18593.1   dual specificity protein phosphatase-related, contains weak similarity to Dual specificity protein phosphatase 12 (EC 3.1.3.48) (EC 3.1.3.16) (Dual-specificity tyrosine phosphatase YVH1) (Swiss-Prot:Q9UNI6) (Homo sapiens)   chr4:10237583-10238847 FORWARD   Aliases: None                                                                                                                                                                               | 8.6 | 7.1  | 1.5  | 6.3  |
| 135 AT2G36230.1   Symbol: BBM II II   N'-5'-phosphoribosyl-formimino-5-aminoimidazole-4-carboxamide ribonucleotide isomerase, identical to N'-5'-phosphoribosyl-formimino-5-aminoimidazole-4-carboxamide ribonucleotide isomerase GI:3449284 from (Arabidopsis thaliana); contains Pfam profile: PF00977 histidine biosynthesis protein   chr2:15200779-15202617 REVERSE   Aliases: F2H17.16, F2H17_16, PHOSPHORIBOSYLFORMIMINO 5 AMINOIMIDAZOLE CARBOXAMIDE RIBOTIDE ISOMERASE | 8.6 | 3.5  | 5.1  | 18.6 |
| 1757 AT3G62940.2   OTU-like cysteine protease family protein, contains Pfam profile PF02338: OTU-like cysteine protease   chr3:23273925-23275646 REVERSE   Aliases: T20O10.40                                                                                                                                                                                                                                                                                                   | 8.6 | 6.9  | 1.7  | 7.8  |
| 17740 AT4G34180.1   cyclase family protein, contains Pfam profile: PF04199 putative cyclase   chr4:16369361-16371434 REVERSE   Aliases: F10M10.6                                                                                                                                                                                                                                                                                                                                | 8.6 | 8.3  | 0.3  | 0.6  |
| 13399 AT3G61990.1   O-methyltransferase family 3 protein, several O-methyltransferases - different species; contains Pfam 01596 O-methyltransferase domain   chr3:22968048-22969970 REVERSE   Aliases: F21F14.160                                                                                                                                                                                                                                                               | 8.6 | 7.7  | 1.0  | 1.5  |
| 15537 AT2G43630.1   expressed protein   chr2:18102854-18104565 FORWARD   Aliases: F18O19.26                                                                                                                                                                                                                                                                                                                                                                                     | 8.6 | 8.3  | 0.3  | 1.1  |
| 15715 AT1G61730.1   DNA-binding storekeeper protein-related, contains Pfam profile: PF04504 protein of unknown function, DUF573; similar to storekeeper protein GI:14268476 (Solanum tuberosum)   chr1:22796884-22798368 REVERSE   Aliases: T13M11.9, T13M11_9                                                                                                                                                                                                                  | 8.6 | 8.8  | -0.2 | -1.0 |
| 1419 AT2G46690.1   auxin-responsive family protein, similar to indole-3-acetic acid induced protein ARG7 (SP:P32295) (Phaseolus aureus)   chr2:19187800-19188537 FORWARD   Aliases: T3A4.7                                                                                                                                                                                                                                                                                      | 8.6 | 10.5 | -1.9 | -8.4 |
| 2870 AT2G36910.1   Symbol: ATPGP1                                                                                                                                                                                                                                                                                                                                                                                                                                               | 8.6 | 10.1 | -1.5 | -6.3 |
| 10785 AT1G32750.1   Symbol: HAF01   HAC13 protein (HAC13), identical to HAC13 (Arabidopsis thaliana) gi:21105767:gb:AAM34782; contains Pfam domains, PF00439: Bromodomain and PF00240: Ubiquitin family   chr1:11846227-11856241 REVERSE   Aliases: F6N18.13, F6N18_13, GTD01, GTD1, HAC13, HAF1                                                                                                                                                                                | 8.6 | 9.2  | -0.6 | -2.1 |
| 19813 AT1G32290.1   expressed protein   chr1:11650202-11650547 REVERSE   Aliases: F27G20.4                                                                                                                                                                                                                                                                                                                                                                                      | 8.6 | 8.7  | -0.1 | -0.2 |
| 795 AT4G18480.1   Symbol: CHL11   magnesium-chelatase subunit chlI, chloroplast / Mg-protoporphyrin IX chelatase (CHLI) (CS) (CH42), identical to SP:P161127 Magnesium-chelatase subunit chlI, chloroplast precursor (Mg-protoporphyrin IX chelatase) (Protein CS/CH-42) {Arabidopsis thaliana}   chr4:10201683-10203454 REVERSE   Aliases: CH 42, CH42, CHLORATA, CHLORINA 42, F28J12.140, F28J12_140, PROTOPORPHYRIN IX MG CHELATASE                                          | 8.6 | 4.7  | 3.9  | 10.3 |
| 9640 AT1G77450.1   Symbol: ANAC032   no apical meristem (NAM) family protein, contains Pfam PF02365: No apical meristem (NAM) domain; similar to GRAB1 protein GB:CAA09371, a novel member of the NAC domain family   chr1:29104848-29106155 FORWARD   Aliases: ANAC032, T5M16.4, T5M16_4                                                                                                                                                                                       | 8.6 | 8.0  | 0.6  | 2.5  |
| 19929 AT1G36050.1   expressed protein   chr1:13451416-13454454 FORWARD   Aliases: F5J5.4, F5J5_4                                                                                                                                                                                                                                                                                                                                                                                | 8.6 | 8.5  | 0.1  | 0.2  |
| 1252 AT3G17930.1   expressed protein   chr3:6141834-6143316 REVERSE   Aliases: MEB5.15                                                                                                                                                                                                                                                                                                                                                                                          | 8.6 | 5.8  | 2.8  | 8.8  |
| 3566 AT5G10730.1   expressed protein   chr5:3390615-3393107 REVERSE   Aliases: MAJ23.90, MAJ23_90                                                                                                                                                                                                                                                                                                                                                                               | 8.6 | 6.6  | 2.1  | 5.6  |
| 4174 AT3G55430.1   glycosyl hydrolase family 17 protein / beta-1,3-glucanase, putative, similar to beta-1,3 glucanase GI:7414433 from (Pisum sativum); contains Pfam profile PF00332: Glycosyl hydrolases family 17                                                                                                                                                                                                                                                             | 8.6 | 7.0  | 1.7  | 5.1  |
| 14415 AT3G45310.2   similar to cysteine proteinase, putative / AALP protein (AALP) [Arabidopsis thaliana] (TAIR:At5g60360.1); similar to cysteine protease [Prunus armeniaca] (GB:AAB97142.1); contains InterPro domain Papain cysteine protease (C1) (InterPro:IPR000668); contains InterPro domain Eukaryotic thiol (cysteine) protease (InterPro:IPR000169)   chr3:16639369-16641506 REVERSE   Aliases: F18N11.70                                                            | 8.6 | 9.3  | -0.7 | -1.3 |
| 12011 AT5G53440.1   expressed protein   chr5:21700905-21705196 REVERSE   Aliases: MYN8.5, MYN8_5                                                                                                                                                                                                                                                                                                                                                                                | 8.6 | 8.3  | 0.3  | 1.8  |



|                                                                                                                                                                                                                                                                                                                                                                                                                                                                                                            |     |      |      |      |
|------------------------------------------------------------------------------------------------------------------------------------------------------------------------------------------------------------------------------------------------------------------------------------------------------------------------------------------------------------------------------------------------------------------------------------------------------------------------------------------------------------|-----|------|------|------|
| 9271 AT3G49580.1   expressed protein   chr3:18386254-18386762 REVERSE   Aliases: T9C5.170                                                                                                                                                                                                                                                                                                                                                                                                                  | 8.6 | 6.3  | 2.3  | 2.6  |
| 5513 AT4G00630.1   Symbol: KEA2   K+ efflux antiporter, putative (KEA2), Monovalent cation:proton antiporter family 2 (CPA2 family) member, PMID:11500563; similar to SWISS-PROT:SPP03819 Glutathione-regulated potassium-efflux system protein kefC (K(+)/H(+)) antiporter (Escherichia coli)   chr4:261655-265958 REVERSE   Aliases: ATKEA2, F6N23.15, F6N23_15                                                                                                                                          | 8.6 | 9.6  | -1.0 | -4.3 |
| 17387 AT2G17120.1   peptidoglycan-binding LysM domain-containing protein, contains Pfam profile PF01476: LysM domain; supporting cDNA gi:16226688:gb:AF428464.1:AF428464   chr2:7466129-7468388 FORWARD   Aliases: F6P23.25, F6P23_25                                                                                                                                                                                                                                                                      | 8.6 | 8.4  | 0.2  | 0.7  |
| 5102 AT1G08880.1   histone H2A, putative, Strong similarity to histone H2A Cicer arietinum SP:O65759, Picea abies SP:P35063; contains Pfam profile PF00125 Core histone H2A/H2B/H3/H4; ESTs gb:ATTS3874,gb:T46627,gb:T14194 come from this gene   chr1:2846956-2847784 REVERSE   Aliases: F7G19.24, F7G19_24                                                                                                                                                                                               | 8.6 | 5.8  | 2.8  | 4.5  |
| 19820 AT3G57230.1   Symbol: AGL16   MADS-box protein (AGL16), MADS-box transcription factor DEFH125 - Antirrhinum majus, PIR:T17029; contains Pfam domain PF00319: SRF-type transcription factor (DNA-binding and dimerisation domain); contains Pfam domain PF01486: K-box region   chr3:21188689-21191911 FORWARD   Aliases: F28O9.80                                                                                                                                                                    | 8.6 | 8.5  | 0.1  | 0.2  |
| 5215 AT1G14830.1   Symbol: ADL1C   dynamin-like protein C (DL1C), nearly identical to dynamin-like protein C (Arabidopsis thaliana) GI:19569772   chr1:5107416-5111665 REVERSE   Aliases: ADL1C, ADL5, DYNAMIN LIKE PROTEIN 5, F10B6.23, F10B6_23                                                                                                                                                                                                                                                          | 8.6 | 6.4  | 2.2  | 4.4  |
| 305 AT4G21610.1   Symbol: LOL2   zinc finger protein, putative, similar to zinc-finger protein Lsd1 (Arabidopsis thaliana) gi:1872521:gb:AAC49660                                                                                                                                                                                                                                                                                                                                                          | 8.6 | 4.3  | 4.3  | 14.2 |
| 20255 AT3G20120.2   Symbol: CYP705A21   similar to cytochrome P450 family protein [Arabidopsis thaliana] (TAIR:At3g20110.1); similar to C93A2_SOYBN Cytochrome P450 93A2 (GB:Q42799); contains InterPro domain E-class P450, group I (InterPro:IPR002401); contains InterPro domain Cytochrome P450 (InterPro:IPR001128)   chr3:7023317-7025929 FORWARD   Aliases: MAL21.16                                                                                                                                | 8.6 | 8.6  | 0.0  | 0.2  |
| 9037 AT5G49530.1   SIN-like family protein, low similarity to Sex-lethal interactor (Drosophila melanogaster) GI:6049274; contains Pfam profile PF04801: Sin-like protein conserved region   chr5:20117805-20121673 FORWARD   Aliases: K6M13.8, K6M13_8                                                                                                                                                                                                                                                    | 8.6 | 7.9  | 0.7  | 2.7  |
| 1562 AT5G42480.1   Symbol: ARC6   DNAJ plastid division protein (ARC6), almost identical to dnaJ plastid division protein ARC6 (GI:33436339) (Arabidopsis thaliana); low similarity to cell division protein Ftn2 (Synechococcus sp. PCC 7942) GI:16226084; contains Pfam profile PF00226: DnaJ domain   chr5:17002410-17005668 FORWARD   Aliases: ACCUMULATION AND REPLICATION OF CHLOROPLASTS 6, MDH9.18, MDH9_18                                                                                        | 8.6 | 7.2  | 1.4  | 8.1  |
| 300 AT5G65750.1   2-oxoglutarate dehydrogenase E1 component, putative / oxoglutarate decarboxylase, putative / alpha-ketoglutaric dehydrogenase, putative, similar to SP:P20967 2-oxoglutarate dehydrogenase E1 component, mitochondrial precursor (EC 1.2.4.2) (Alpha-ketoglutarate dehydrogenase) {Saccharomyces cerevisiae}; contains Pfam profiles PF02779: Transketolase, pyridine binding domain, PF00676: Dehydrogenase E1 component   chr5:26320932-26325415 FORWARD   Aliases: MPA24.10, MPA24_10 | 8.6 | 4.7  | 3.9  | 14.3 |
| 1228 AT3G01470.1   Symbol: ATHB 1                                                                                                                                                                                                                                                                                                                                                                                                                                                                          | 8.6 | 11.5 | -2.9 | -8.9 |
| 9283 AT5G47840.1   adenylate kinase, chloroplast, putative / ATP-AMP transphosphorylase, putative, similar to SP:P43188 Adenylate kinase, chloroplast (EC 2.7.4.3) (ATP-AMP transphosphorylase) {Zea mays}; contains Pfam profile PF00406: Adenylate kinase                                                                                                                                                                                                                                                | 8.6 | 7.3  | 1.3  | 2.6  |
| 15385 AT1G73030.1   SNF7 family protein, contains Pfam domain, PF03357: SNF7 family   chr1:27477487-27478783 FORWARD   Aliases: F3N23.23, F3N23_23                                                                                                                                                                                                                                                                                                                                                         | 8.6 | 8.2  | 0.4  | 1.1  |
| 13188 AT1G01230.1   ORMDL family protein, contains Pfam domain PF04061: ORMDL family                                                                                                                                                                                                                                                                                                                                                                                                                       | 8.6 | 8.1  | 0.5  | 1.5  |
| 1407 AT5G47320.1   Symbol: RPS19   30S ribosomal protein S19, mitochondrial (RPS19)   chr5:19220379-19222499 FORWARD   Aliases: MQL5.18, MQL5_18                                                                                                                                                                                                                                                                                                                                                           | 8.6 | 5.7  | 2.9  | 8.4  |
| 5188 AT3G50970.1   Symbol: XERO2   dehydrin xero2 (XERO2) / low-temperature-induced protein LTI30 (LTI30), identical to dehydrin Xero 2 (Low-temperature-induced protein LTI30) (Arabidopsis thaliana) SWISS-PROT:P42758   chr3:18951758-18952535 FORWARD   Aliases: F24M12.10                                                                                                                                                                                                                             | 8.6 | 10.8 | -2.2 | -4.5 |
| 13488 AT3G11730.1   Symbol: ATPF8   Ras-related GTP-binding protein, putative, similar to Rab1-like small GTP-binding protein GI:4096662 from (Petunia x hybrida)   chr3:3709332-3711489 REVERSE   Aliases: ATPF8, F26K24.2                                                                                                                                                                                                                                                                                | 8.6 | 8.3  | 0.3  | 1.5  |
| 17043 AT2G22250.3   similar to aminotransferase class I and II family protein [Arabidopsis thaliana] (TAIR:At1g77670.1); similar to aspartate aminotransferase [Pinus pinaster] (GB:CAF31327.1); contains InterPro domain Aminotransferase, class I and II (InterPro:IPR004839); contains InterPro domain Aminotransferases class-I pyridoxal-phosphate-binding site (InterPro:IPR004838)   chr2:9464890-9467999 REVERSE   Aliases: T26C19.9, T26C19_9                                                     | 8.6 | 8.9  | -0.3 | -0.8 |
| 1742 AT5G03650.1   Symbol: SBE2.2                                                                                                                                                                                                                                                                                                                                                                                                                                                                          | 8.6 | 4.9  | 3.7  | 7.8  |
| 3737 AT5G10810.1   Symbol: ATER   enhancer of rudimentary protein, putative, identical to enhancer of rudimentary homolog SP:Q96319 from (Arabidopsis thaliana); contains Pfam profile: PF01133 enhancer of rudimentary   chr5:3418667-3420636 REVERSE   Aliases: ENHANCER OF RUDIMENTARY HOMOLOG ATER, T30N20.80, T30N20_80                                                                                                                                                                               | 8.6 | 6.3  | 2.4  | 5.5  |

|                                                                                                                                                                                                                                                                                                                                                                                                                                                                                                                                                                                                                                                       |     |     |      |      |
|-------------------------------------------------------------------------------------------------------------------------------------------------------------------------------------------------------------------------------------------------------------------------------------------------------------------------------------------------------------------------------------------------------------------------------------------------------------------------------------------------------------------------------------------------------------------------------------------------------------------------------------------------------|-----|-----|------|------|
| 572 AT1G22270.1   expressed protein, contains Pfam domain PF03966: Protein of unknown function (DUF343)   chr1:7865482-7866128 FORWARD   Aliases: T16E15.11, T16E15_11                                                                                                                                                                                                                                                                                                                                                                                                                                                                                | 8.6 | 4.4 | 4.2  | 11.5 |
| 16084 AT3G02760.1   histidyl-tRNA synthetase, putative / histidine--tRNA ligase, putative, similar to SP:P12081 Histidyl-tRNA synthetase (EC 6.1.1.21) (Histidine--tRNA ligase) (HisRS) {Homo sapiens}; contains Pfam profiles PF00587: tRNA synthetase class II core domain (G, H, P, S and T), PF03129: Anticodon binding domain   chr3:597366-599445 REVERSE   Aliases: F13E7.30, F13E7_30                                                                                                                                                                                                                                                         | 8.6 | 8.2 | 0.4  | 1.0  |
| 2239 AT2G28740.1   Symbol: HIS4   histone H4, identical to histone H4 from Lycopersicon esculentum GI:297150, Lolium temulentum SP:P02308, Acropora formosa GI:455652, Citrus jambhiri GI:16797797                                                                                                                                                                                                                                                                                                                                                                                                                                                    | 8.6 | 5.9 | 2.7  | 7.0  |
| 7504 AT5G51140.1   pseudouridine synthase family protein, low similarity to SP:P23851 Ribosomal large subunit pseudouridine synthase C (EC 4.2.1.70) (Pseudouridylate synthase) (Uracil hydrolyase) {Escherichia coli}; contains Pfam profile PF00849: RNA pseudouridylate synthase                                                                                                                                                                                                                                                                                                                                                                   | 8.6 | 7.9 | 0.7  | 3.3  |
| 8295 AT5G15090.1   porin, putative / voltage-dependent anion-selective channel protein, putative, similar to SP:P42055 34 kDa outer mitochondrial membrane protein porin (Voltage-dependent anion-selective channel protein) (VDAC) {Solanum tuberosum}; contains Pfam profile PF01459: Eukaryotic porin; identical to cDNA voltage-dependent anion-selective channel protein GI:4006940   chr5:4889298-4891475 REVERSE   Aliases: F2G14.210, F2G14_210                                                                                                                                                                                               | 8.6 | 7.4 | 1.2  | 3.0  |
| 1065 AT5G23120.1   Symbol: HCF136                                                                                                                                                                                                                                                                                                                                                                                                                                                                                                                                                                                                                     | 8.6 | 5.8 | 2.8  | 9.3  |
| 8338 AT1G10630.1   Gene encoding ADP-ribosylation factor and similar to other ARFs and ARF-like proteins. Members of this family are known to be essential for vesicle coating and uncoating and functions in GTP-binding. The gene is shown to play a role in cell division, cell expansion and cellulose production using antisense construct.   chr1:3512796-3514724 REVERSE   Aliases: F20B24.7, F20B24_7                                                                                                                                                                                                                                         | 8.6 | 7.6 | 0.9  | 3.0  |
| 12014 AT4G15560.1   Symbol: CLA1   1-deoxy-D-xylulose 5-phosphate synthase, putative / 1-deoxyxylulose-5-phosphate synthase, putative / DXP-synthase, putative (DEF) (CLA1), identical to SP:Q38854 Probable 1-deoxy-D-xylulose 5-phosphate synthase, chloroplast precursor (EC 4.1.3.37) (1-deoxyxylulose-5-phosphate synthase) (DXP synthase) (DXPS). (Mouse-ear cress) {Arabidopsis thaliana}, DEF (deficient in photosynthesis) protein (Arabidopsis thaliana) GI:1399261   chr4:8883905-8887563 FORWARD   Aliases: 1 DEOXY D XYLULOSE 5 PHOSPHATE SYNTHASE, CHLOROPLASTOS ALTERADOS, CLA, CLOROPLASTOS ALTERADOS 1, DEF, DL3821W, DXS, FCAALL.24 | 8.6 | 8.0 | 0.6  | 1.8  |
| 11088 AT3G57290.1   Symbol: EIF3E   eukaryotic translation initiation factor 3E / eIF3e (TIF3E1), identical to eukaryotic initiation factor 3E subunit (Arabidopsis thaliana) gi:12407658:gb:AAG53613   chr3:21207533-21210127 REVERSE   Aliases: ATEIF3E 1, EIF3E, F28O9.140, INT 6, TIF3E1                                                                                                                                                                                                                                                                                                                                                          | 8.6 | 7.4 | 1.2  | 2.0  |
| 919 AT2G37790.1   aldo/keto reductase family protein, similar to chalcone reductase (Sesbania rostrata)(GI:2792155), and aldose reductase ALDRXV4 (Xerophyta viscosa)(GI:4539944),                                                                                                                                                                                                                                                                                                                                                                                                                                                                    | 8.6 | 5.5 | 3.1  | 9.8  |
| 9538 AT4G39990.1   Symbol: ATGB3   Ras-related GTP-binding protein, putative, similar to GTP-binding protein GI:303738 from (Pisum sativum)   chr4:18542616-18543972 FORWARD   Aliases: GTP BINDING PROTEIN 3, T5J17.160, T5J17_160                                                                                                                                                                                                                                                                                                                                                                                                                   | 8.6 | 7.3 | 1.3  | 2.5  |
| 8598 ATCG00640.1   Symbol: RPL33   encodes a chloroplast ribosomal protein L33, a constituent of the large subunit of the ribosomal complex   chrC:67488-67688 FORWARD   Aliases: RPL33                                                                                                                                                                                                                                                                                                                                                                                                                                                               | 8.6 | 6.2 | 2.4  | 2.9  |
| 10247 AT5G11740.1   Symbol: AGP15   arabinogalactan-protein (AGP15), identical to gi:10880507:gb:AAG24283   chr5:3784252-3784793 FORWARD   Aliases: ARABINO GALACTAN PROTEIN 15, T22P22.130, T22P22_130                                                                                                                                                                                                                                                                                                                                                                                                                                               | 8.6 | 7.2 | 1.4  | 2.3  |
| 6791 AT2G43090.1   aconitase C-terminal domain-containing protein, contains Pfam profile PF00694: Aconitase C-terminal domain   chr2:17926004-17927506 FORWARD   Aliases: MFL8.15                                                                                                                                                                                                                                                                                                                                                                                                                                                                     | 8.6 | 5.2 | 3.4  | 3.6  |
| 3141 AT1G62810.1   copper amine oxidase, putative, similar to copper amine oxidase (Cicer arietinum) gi:3819099:emb:CAA08855   chr1:23261391-23265631 REVERSE   Aliases: F23N19.18, F23N19_18                                                                                                                                                                                                                                                                                                                                                                                                                                                         | 8.6 | 6.7 | 1.9  | 6.0  |
| 9127 AT5G36230.1   eIF4-gamma/eIF5/eIF2-epsilon domain-containing protein, low similarity to SP:Q13144 Translation initiation factor eIF-2B epsilon subunit (eIF-2B GDP-GTP exchange factor) {Homo sapiens}; contains Pfam profile PF02020: eIF4-gamma/eIF5/eIF2-epsilon   chr5:14290614-14294232 FORWARD   Aliases: T30G6.9, T30G6_9                                                                                                                                                                                                                                                                                                                 | 8.6 | 7.9 | 0.7  | 2.7  |
| 15653 AT2G33340.3   similar to transducin family protein / WD-40 repeat family protein [Arabidopsis thaliana] (TAIR:At1g04510.1); similar to ENSANGP00000016070 [Anopheles gambiae str. PEST] (GB:XP_308568.2); contains InterPro domain Zn-finger, modified RING (InterPro:IPR003613); contains InterPro domain G-protein beta WD-40 repeat (InterPro:IPR001680)   chr2:14133294-14138219 REVERSE   Aliases: F4P9.11, F4P9_11                                                                                                                                                                                                                        | 8.6 | 8.4 | 0.2  | 1.0  |
| 1261 AT3G26980.1   ubiquitin family protein, contains INTERPRO:IPR000626 ubiquitin domain   chr3:9947403-9949277 REVERSE   Aliases: MOJ10.7                                                                                                                                                                                                                                                                                                                                                                                                                                                                                                           | 8.6 | 5.4 | 3.2  | 8.8  |
| 8405 AT2G02800.2   Symbol: APK2B   protein kinase (APK2b), identical to protein kinase APK2b (Arabidopsis thaliana) gi:2852449:dbj:BAA24695   chr2:795514-799441 REVERSE   Aliases: PROTEIN KINASE 2B, T20F6.6, T20F6_6                                                                                                                                                                                                                                                                                                                                                                                                                               | 8.6 | 9.7 | -1.2 | -2.9 |

|                                                                                                                                                                                                                                                                                                                                                                                                     |     |      |      |      |
|-----------------------------------------------------------------------------------------------------------------------------------------------------------------------------------------------------------------------------------------------------------------------------------------------------------------------------------------------------------------------------------------------------|-----|------|------|------|
| 1359 AT1G24610.1   SET domain-containing protein, low similarity to SP:Q43088 Ribulose-1,5 bisphosphate carboxylase/oxygenase large subunit N- methyltransferase, chloroplast precursor (EC 2.1.1.127) {Pisum sativum}; contains Pfam profile PF00856: SET domain   chr1:8720177-8722732 REVERSE   Aliases: F21J9.27                                                                                | 8.6 | 5.7  | 2.8  | 8.6  |
| 11116 AT4G21160.4   Symbol: ZAC   zinc finger and C2 domain protein (ZAC), identical to zinc finger and C2 domain protein GI:9957238 from (Arabidopsis thaliana)   chr4:11284387-11286755 FORWARD   Aliases: None                                                                                                                                                                                   | 8.6 | 7.4  | 1.2  | 2.0  |
| 6629 AT2G17990.1   expressed protein   chr2:7834004-7835836 FORWARD   Aliases: T27K22.14, T27K22_14                                                                                                                                                                                                                                                                                                 | 8.6 | 9.5  | -0.9 | -3.7 |
| 15882 AT5G16830.1   Symbol: SYP21   syntaxin 21 (SYP21) / PEP12 homolog, identical to Syntaxin homolog (PEP12 homolog) (SP:Q39233) and syntaxin of plants 21 (GP:899122) {Arabidopsis thaliana}; contains Pfam profiles PF05739:SNARE domain and PF00804: Syntaxin                                                                                                                                  | 8.6 | 8.1  | 0.4  | 1.0  |
| 19073 AT3G01780.1   expressed protein, est hit,   chr3:279067-283554 FORWARD   Aliases: F28J7.11, F28J7_11                                                                                                                                                                                                                                                                                          | 8.6 | 8.7  | -0.1 | -0.4 |
| 14603 AT5G20920.2   Symbol: EIF2 BETA   eukaryotic translation initiation factor 2 subunit 2, putative / eIF-2-beta, putative, similar to SP:P41035 Eukaryotic translation initiation factor 2 subunit (eIF-2-beta) {Oryctolagus cuniculus}; contains Pfam profile PF01873: Domain found in IF2B/IF5   chr5:7094721-7097077 REVERSE   Aliases: EMB1401, EMBRYO DEFECTIVE 1401, F22D1.90, F22D1_90   | 8.6 | 8.3  | 0.3  | 1.2  |
| 20097 AT5G01750.2   expressed protein, contains Pfam profile PF04525: Protein of unknown function (DUF567)   chr5:289762-291323 FORWARD   Aliases: T20L15.20, T20L15_20                                                                                                                                                                                                                             | 8.6 | 8.7  | -0.1 | -0.2 |
| 3197 AT1G26665.2   expressed protein   chr1:9214164-9215538 FORWARD   Aliases: None                                                                                                                                                                                                                                                                                                                 | 8.6 | 6.9  | 1.6  | 5.9  |
| 2771 AT4G21860.1   methionine sulfoxide reductase domain-containing protein / SelR domain-containing protein, low similarity to pilin-like transcription factor (Homo sapiens) GI:5059062, SP:P14930 Peptide methionine sulfoxide reductase msrA/msrB (EC 1.8.4.6) {Neisseria gonorrhoeae}; contains Pfam profile PF01641: SelR domain   chr4:11600085-11601572 REVERSE   Aliases: T8O5.70, T8O5_70 | 8.6 | 6.3  | 2.3  | 6.4  |
| 1066 AT5G57560.1   Symbol: TCH4   xyloglucan:xyloglucosyl transferase / xyloglucan endotransglycosylase / endo-xyloglucan transferase (TCH4), identical to xyloglucan endotransglycosylase TCH4 protein GI:886116   chr5:23324356-23325507 REVERSE   Aliases: MUA2.13, MUA2_13, TOUCH 4, XTH22, XYLOGLUCAN ENDOTRANSGLYCOSYLASE                                                                     | 8.6 | 4.2  | 4.4  | 9.3  |
| 13069 AT4G15545.1   expressed protein   chr4:8875918-8877755 FORWARD   Aliases: None                                                                                                                                                                                                                                                                                                                | 8.6 | 7.6  | 1.0  | 1.6  |
| 4248 AT5G17000.1   NADP-dependent oxidoreductase, putative, strong similarity to probable NADP-dependent oxidoreductase (zeta-crystallin homolog) P1 (SP:Q39172)(gi:886428) and P2 (SP:Q39173)(gi:886430), Arabidopsis thaliana   chr5:5584804-5587066 REVERSE   Aliases: F2K13.150, F2K13_150                                                                                                      | 8.6 | 6.9  | 1.7  | 5.1  |
| 8228 AT2G21970.1   Symbol: SEP2   stress enhanced protein 2 (SEP2), nearly identical to stress enhanced protein 2; SEP2 (GI:7384980) (Arabidopsis thaliana)   chr2:9364063-9364996 REVERSE   Aliases: F7D8.29, F7D8_29, SEP2, STRESS ENHANCED PROTEIN 2                                                                                                                                             | 8.6 | 7.8  | 0.7  | 3.0  |
| 4101 AT2G45520.1   expressed protein   chr2:18761830-18763362 REVERSE   Aliases: F17K2.5                                                                                                                                                                                                                                                                                                            | 8.6 | 7.4  | 1.2  | 5.2  |
| 284 AT2G46110.1   ketopantoate hydroxymethyltransferase family protein, similar to SP:Q9Y7B6 3-methyl-2-oxobutanoate hydroxymethyltransferase (EC 2.1.2.11) (Ketopantoate hydroxymethyltransferase) {Emericella nidulans}; contains Pfam profile PF02548: Ketopantoate hydroxymethyltransferase   chr2:18961532-18963603 REVERSE   Aliases: T3F17.24                                                | 8.6 | 3.6  | 5.0  | 14.7 |
| 9338 AT5G09410.1   Symbol: EICBP.B   calmodulin-binding protein, similar to another ethylene-upregulated calmodulin-binding protein ER1 GI:11612392 from (Nicotiana tabacum)   chr5:2921458-2927417 FORWARD   Aliases: EICBP.B, ETHYLENE INDUCED CALMODULIN BINDING PROTEIN, T5E8.210, T5E8_210                                                                                                     | 8.6 | 9.4  | -0.8 | -2.6 |
| 13217 AT5G58380.1   Symbol: CIPK10                                                                                                                                                                                                                                                                                                                                                                  | 8.6 | 9.3  | -0.7 | -1.5 |
| 2149 AT1G76520.2   auxin efflux carrier family protein, contains auxin efflux carrier domain, Pfam:PF03547   chr1:28720049-28722308 FORWARD   Aliases: F14G6.12, F14G6_12                                                                                                                                                                                                                           | 8.6 | 4.5  | 4.1  | 7.2  |
| 1036 AT3G02480.1   ABA-responsive protein-related, similar to ABA-inducible protein (Fagus sylvatica) GI:3901016, cold-induced protein kin1 (Brassica napus) GI:167146   chr3:512321-513034 FORWARD   Aliases: F16B3.11, F16B3_11                                                                                                                                                                   | 8.6 | 3.2  | 5.4  | 9.4  |
| 8018 AT2G20230.1   expressed protein   chr2:8732622-8735101 FORWARD   Aliases: F11A3.22, F11A3_22                                                                                                                                                                                                                                                                                                   | 8.6 | 10.1 | -1.5 | -3.1 |
| 14330 AT3G27380.1   Symbol: SDH2 1                                                                                                                                                                                                                                                                                                                                                                  | 8.6 | 8.1  | 0.5  | 1.3  |
| 16935 AT2G44970.1   lipase-related, contains weak similarity to lipase (Pseudomonas aeruginosa) gi:3550950:gb:AAC34733.   chr2:18555898-18559130 REVERSE   Aliases: T14P1.23, T14P1_23                                                                                                                                                                                                              | 8.6 | 8.4  | 0.2  | 0.8  |



|                   |                                                                                                                                                                                                                                                                                                                                                                                                                      |     |      |      |      |
|-------------------|----------------------------------------------------------------------------------------------------------------------------------------------------------------------------------------------------------------------------------------------------------------------------------------------------------------------------------------------------------------------------------------------------------------------|-----|------|------|------|
| 13049 AT4G02720.1 | expressed protein, temporary automated functional assignment   chr4:1204303-1205866 REVERSE   Aliases: T5J8.1                                                                                                                                                                                                                                                                                                        | 8.6 | 8.0  | 0.6  | 1.6  |
| 9196 AT1G70160.1  | expressed protein, similar to hypothetical protein GI:4455225 from (Arabidopsis thaliana)   chr1:26423612-26426188 FORWARD   Aliases: F20P5.12, F20P5_12                                                                                                                                                                                                                                                             | 8.6 | 9.7  | -1.1 | -2.6 |
| 4700 AT5G05980.2  | Symbol: ATDFB   similar to dihydrofolate synthetase/folylpolyglutamate synthetase (DHFS/FPGS4) [Arabidopsis thaliana] (TAIR:At3g55630.3); similar to folylpoly-gammaglutamate synthetase precursor [Cricetulus griseus] (GB:AAK69546.1); contains InterPro domain Folylpolyglutamate synthetase (InterPro:IPR001645)   chr5:1799491-1804296 REVERSE   Aliases: A. THALIANA DHFS FPGS HOMOLOG B, K18J17.17, K18J17_17 | 8.6 | 9.5  | -0.9 | -4.8 |
| 5814 AT3G20000.1  | Symbol: TOM40   porin family protein, low similarity to haymaker protein (Mus musculus) GI:17834089, mitochondrial outer membrane protein MOM35 (Mus musculus) GI:6650562; contains Pfam profile PF01459: Eukaryotic porin   chr3:6967596-6970571 FORWARD   Aliases: MZE19.5                                                                                                                                         | 8.6 | 7.0  | 1.5  | 4.1  |
| 1610 AT5G03380.2  | similar to heavy-metal-associated domain-containing protein [Arabidopsis thaliana] (TAIR:At2g36950.1); similar to GMFP5 [Glycine max] (GB:AAD09514.1); contains InterPro domain Heavy metal binding (InterPro:IPR006191); contains InterPro domain Heavy metal transport/detoxification protein (InterPro:IPR006121)   chr5:832103-834284 REVERSE   Aliases: F12E4.120, F12E4_120                                    | 8.6 | 12.3 | -3.7 | -8.0 |
| 1755 AT5G63970.2  | similar to copine-related [Arabidopsis thaliana] (TAIR:At3g01650.1); similar to P0401G10.23 [Oryza sativa (japonica cultivar-group)] (GB:NP_914244.1); contains InterPro domain von Willebrand factor, type A (InterPro:IPR002035)   chr5:25623997-25626213 REVERSE   Aliases: MBM17.7, MBM17_7                                                                                                                      | 8.6 | 9.7  | -1.2 | -7.8 |
| 2164 AT3G54920.1  | Symbol: PMR6   pectate lyase, putative / powdery mildew susceptibility protein (PMR6), identical to powdery mildew susceptibility protein (Arabidopsis thaliana) GI:22506901; similar to pectate lyase 2 GP:6606534 from (Musa acuminata)   chr3:20356077-20359507 FORWARD   Aliases: F28P10.100, POWDERY MILDEW RESISTANT 6                                                                                         | 8.6 | 5.9  | 2.7  | 7.2  |
| 16953 AT2G03510.1 | band 7 family protein, contains Pfam profile PF01145: SPFH domain / Band 7 family   chr2:1066639-1069096 FORWARD   Aliases: T4M8.5, T4M8_5                                                                                                                                                                                                                                                                           | 8.6 | 8.2  | 0.4  | 0.8  |
| 4085 AT4G36990.1  | Symbol: HSF4   heat shock factor protein 4 (HSF4) / heat shock transcription factor 4 (HSTF4), identical to heat shock transcription factor 4 (HSF4) SP:Q96320 from (Arabidopsis thaliana)   chr4:17440287-17442145 FORWARD   Aliases: AP22.9, AP22_9, AT HSF4, ATHSF4, HEAT SHOCK FACTOR 4, HEAT SHOCK TRANSCRIPTION FACTOR 4, HSF4                                                                                 | 8.6 | 11.3 | -2.7 | -5.2 |
| 8345 AT3G61070.1  | peroxisomal biogenesis factor 11 family protein / PEX11 family protein, contains Pfam PF05648: Peroxisomal biogenesis factor 11 (PEX11)   chr3:22615577-22617741 REVERSE   Aliases: T27I15.160                                                                                                                                                                                                                       | 8.5 | 7.5  | 1.1  | 3.0  |
| 14190 AT1G18980.1 | germin-like protein, putative, similar to germin-like protein subfamily T member 1 (SP:P92995); contains PS00725 germin family signature                                                                                                                                                                                                                                                                             | 8.5 | 7.8  | 0.7  | 1.3  |
| 1901 AT1G77670.1  | aminotransferase class I and II family protein, similar to kynurenine aminotransferase /glutamine transaminase K GI:1030066 (Rattus norvegicus)   chr1:29193795-29195869 REVERSE   Aliases: T5M16.26, T5M16_26                                                                                                                                                                                                       | 8.5 | 4.7  | 3.8  | 7.6  |
| 7351 AT4G34490.1  | Symbol: ATCAP1                                                                                                                                                                                                                                                                                                                                                                                                       | 8.5 | 7.7  | 0.8  | 3.4  |
| 20668 AT1G58200.2 | mechanosensitive ion channel domain-containing protein / MS ion channel domain-containing protein, contains Pfam profile PF00924: Mechanosensitive ion channel   chr1:21551852-21556763 REVERSE   Aliases: F16M22.2, F16M22_2                                                                                                                                                                                        | 8.5 | 8.6  | -0.0 | -0.1 |
| 1865 AT5G22880.1  | histone H2B, putative, strong similarity to histone H2B-3 Lycopersicon esculentum GI:3021485, H2B Gossypium hirsutum SP:O22582; contains Pfam profile PF00125 Core histone H2A/H2B/H3/H4                                                                                                                                                                                                                             | 8.5 | 4.5  | 4.0  | 7.6  |
| 7205 AT5G15350.1  | plastocyanin-like domain-containing protein, contains plastocyanin-like domain Pfam:PF02298   chr5:4984962-4986221 REVERSE   Aliases: F8M21.240, F8M21_240                                                                                                                                                                                                                                                           | 8.5 | 6.8  | 1.8  | 3.4  |
| 2484 AT2G44120.2  | 60S ribosomal protein L7 (RPL7C)                                                                                                                                                                                                                                                                                                                                                                                     | 8.5 | 6.5  | 2.0  | 6.7  |
| 13500 AT5G38630.1 | Symbol: ACYB 1                                                                                                                                                                                                                                                                                                                                                                                                       | 8.5 | 8.9  | -0.4 | -1.5 |
| 2410 AT3G08720.2  | Symbol: ATPK19                                                                                                                                                                                                                                                                                                                                                                                                       | 8.5 | 9.8  | -1.3 | -6.8 |
| 4053 AT4G29140.1  | MATE efflux protein-related, several hypothetical proteins - Arabidopsis thaliana; contains Pfam profile PF01554: Uncharacterized membrane protein family   chr4:14368925-14370898 FORWARD   Aliases: F19B15.170, F19B15_170                                                                                                                                                                                         | 8.5 | 6.7  | 1.8  | 5.2  |
| 958 AT2G43640.1   | signal recognition particle 14 kDa family protein / SRP14 family protein, similar to SP:P16254 Signal recognition particle 14 kDa protein (SRP14) {Mus musculus}; contains Pfam profile: PF02290 signal recognition particle 14kD protein   chr2:18104578-18106139 REVERSE   Aliases: F18O19.25                                                                                                                      | 8.5 | 6.8  | 1.8  | 9.7  |

|                   |                                                                                                                                                                                                                                                                                                                                                                                                                                                                                         |     |     |      |      |
|-------------------|-----------------------------------------------------------------------------------------------------------------------------------------------------------------------------------------------------------------------------------------------------------------------------------------------------------------------------------------------------------------------------------------------------------------------------------------------------------------------------------------|-----|-----|------|------|
| 2463 AT4G04870.1  | CDP-alcohol phosphatidyltransferase family protein, similar to SP:Q07560 Cardiolipin synthetase (EC 2.7.8.-) {Saccharomyces cerevisiae; contains Pfam profile PF01066: CDP-alcohol phosphatidyltransferase   chr4:2461211-2464141 REVERSE   Aliases: T4B21.19, T4B21_19                                                                                                                                                                                                                 | 8.5 | 6.7 | 1.8  | 6.7  |
| 7821 AT3G12800.1  | short-chain dehydrogenase/reductase (SDR) family protein, contains Pfam profile PF00106: oxidoreductase, short chain dehydrogenase/reductase family   chr3:4063331-4064795 REVERSE   Aliases: AT3G12790, MBK21.23                                                                                                                                                                                                                                                                       | 8.5 | 7.1 | 1.4  | 3.2  |
| 6356 ATCG00720.1  | Symbol: PETB   Encodes the cytochrome b(6) subunit of the cytochrome b6f complex.   chrC:74841-76292 FORWARD   Aliases: PETB                                                                                                                                                                                                                                                                                                                                                            | 8.5 | 6.7 | 1.8  | 3.8  |
| 4449 AT5G60960.1  | pentatricopeptide (PPR) repeat-containing protein, contains Pfam profile PF01535: PPR repeat   chr5:24545476-24547237 REVERSE   Aliases: MSL3.8, MSL3_8                                                                                                                                                                                                                                                                                                                                 | 8.5 | 5.8 | 2.8  | 4.9  |
| 10961 AT2G18280.2 | similar to F-box family protein / tubby family protein [Arabidopsis thaliana] (TAIR:At1g47270.1); similar to F-box family protein / tubby family protein [Arabidopsis thaliana] (TAIR:At2g47900.1); similar to putative tubby-like protein [Oryza sativa (japonica cultivar-group)] (GB:XP_467371.1); contains InterPro domain Cyclin-like F-box (InterPro:IPR001810); contains InterPro domain Tubby (InterPro:IPR000007)   chr2:7953080-7955550 FORWARD   Aliases: T30D6.21, T30D6_21 | 8.5 | 9.3 | -0.8 | -2.1 |
| 15093 AT1G51070.1 | basic helix-loop-helix (bHLH) family protein, similar to bHLH transcription factor Gl:3757520 from (Arabidopsis thaliana)   chr1:18931559-18933430 FORWARD   Aliases: F23H24.8, F23H24_8                                                                                                                                                                                                                                                                                                | 8.5 | 9.1 | -0.6 | -1.1 |
| 12541 AT5G44320.1 | eukaryotic translation initiation factor 3 subunit 7, putative / eIF-3 zeta, putative / eIF3d, putative, similar to initiation factor 3d (Arabidopsis thaliana) Gl:12407755, SP:O15371 Eukaryotic translation initiation factor 3 subunit 7 (eIF-3 zeta) (eIF3 p66) (eIF3d) {Homo sapiens}; contains Pfam profile PF05091: Eukaryotic translation initiation factor 3 subunit 7 (eIF-3)   chr5:17871816-17873907 REVERSE   Aliases: K9L2.10, K9L2_10                                    | 8.5 | 8.2 | 0.3  | 1.7  |
| 5010 AT3G13040.2  | myb family transcription factor, contains Pfam profile: PF00249 myb-like DNA-binding domain   chr3:4172149-4175255 REVERSE   Aliases: MGH6.22                                                                                                                                                                                                                                                                                                                                           | 8.5 | 9.7 | -1.2 | -4.6 |
| 2412 AT3G24590.1  | signal peptidase I family protein, contains Pfam profile: PF00461 signal peptidase I   chr3:8970679-8972175 FORWARD   Aliases: MOB24.17                                                                                                                                                                                                                                                                                                                                                 | 8.5 | 7.4 | 1.1  | 6.8  |
| 15032 AT1G76550.1 | pyrophosphate--fructose-6-phosphate 1-phosphotransferase alpha subunit, putative / pyrophosphate-dependent 6-phosphofructose-1-kinase, putative, strong similarity to SP:Q41140 Pyrophosphate--fructose 6-phosphate 1-phosphotransferase alpha subunit (EC 2.7.1.90) (PFP) (PPI-PFK) {Ricinus communis}; contains Pfam profile PF00365: Phosphofructokinase   chr1:28727596-28731900 REVERSE   Aliases: F14G6.15, F14G6_15                                                              | 8.5 | 7.8 | 0.8  | 1.2  |
| 11284 AT1G72770.1 | Symbol: HAB1   protein phosphatase 2C P2C-HA / PP2C P2C-HA (P2C-HA), identical to protein phosphatase 2C (AtP2C-HA) GB:AJ003119 (Arabidopsis thaliana) (Plant Mol. Biol. 38 (5), 879-883 (1998))   chr1:27393720-27396943 FORWARD   Aliases: F28P22.4, F28P22_4, HOMOLOGY TO ABI1                                                                                                                                                                                                       | 8.5 | 8.9 | -0.4 | -2.0 |
| 14859 ATCG00170.1 | Symbol: RPOC2   RNA polymerase beta' subunit-2   chrC:15938-20068 REVERSE   Aliases: RPOC2                                                                                                                                                                                                                                                                                                                                                                                              | 8.5 | 7.5 | 1.0  | 1.2  |
| 5631 AT2G33740.2  | Symbol: CUTA   copper-binding protein (CUTA), identical to copper-binding protein CUTA Gl:12963361 from (Arabidopsis thaliana); contains Pfam profile: PF03091 CutA1 divalent ion tolerance protein   chr2:14276657-14278752 FORWARD   Aliases: T1B8.5, T1B8_5                                                                                                                                                                                                                          | 8.5 | 7.3 | 1.2  | 4.2  |
| 16789 AT3G07090.1 | expressed protein   chr3:2243060-2244826 REVERSE   Aliases: T1B9.26                                                                                                                                                                                                                                                                                                                                                                                                                     | 8.5 | 8.0 | 0.6  | 0.8  |
| 17239 AT5G13010.1 | Symbol: EMB3011   RNA helicase, putative, similar to DEAH-box RNA helicase (Chlamydomonas reinhardtii) Gl:12044832; contains Pfam profiles PF04408: Helicase associated domain (HA2), PF00271: Helicase conserved C-terminal domain   chr5:4122581-4128864 FORWARD   Aliases: EMB3011, EMBRYO DEFECTIVE 3011, T24H18.180, T24H18_180                                                                                                                                                    | 8.5 | 8.8 | -0.3 | -0.7 |
| 9752 AT3G53500.2  | Symbol: RSZ32   zinc knuckle (CCHC-type) family protein, contains Pfam domain PF00098: Zinc knuckle   chr3:19845324-19847976 REVERSE   Aliases: F4P12.200, RSZ32                                                                                                                                                                                                                                                                                                                        | 8.5 | 7.8 | 0.7  | 2.4  |
| 8025 AT5G47090.1  | expressed protein   chr5:19144486-19145996 FORWARD   Aliases: K14A3.4, K14A3_4                                                                                                                                                                                                                                                                                                                                                                                                          | 8.5 | 6.7 | 1.8  | 3.1  |
| 7654 AT3G28720.1  | expressed protein   chr3:10783513-10785684 FORWARD   Aliases: T19N8.1                                                                                                                                                                                                                                                                                                                                                                                                                   | 8.5 | 7.1 | 1.4  | 3.3  |
| 3709 AT5G46840.1  | RNA recognition motif (RRM)-containing protein, contains InterPro entry IPR000504: RNA-binding region RNP-1 (RNA recognition motif) (RRM)   chr5:19022828-19024993 FORWARD   Aliases: MZA15.26                                                                                                                                                                                                                                                                                          | 8.5 | 6.0 | 2.6  | 5.5  |
| 11460 AT5G65720.1 | cysteine desulfurase, mitochondrial (NIFS), identical to Cysteine desulfurase, mitochondrial precursor (SP:O49543) {Arabidopsis thaliana}; identical to cDNA Gl:12656131; contains Pfam profile PF00266: aminotransferase, class V   chr5:26313479-26315298 FORWARD   Aliases: MPA24.7, MPA24_7                                                                                                                                                                                         | 8.5 | 8.0 | 0.5  | 2.0  |
| 3963 AT4G33780.1  | expressed protein   chr4:16201833-16203643 REVERSE   Aliases: T16L1.270, T16L1_270                                                                                                                                                                                                                                                                                                                                                                                                      | 8.5 | 6.9 | 1.6  | 5.3  |

|                                                                                                                                                                                                                                                                                                                                                                                                                                       |     |     |      |      |
|---------------------------------------------------------------------------------------------------------------------------------------------------------------------------------------------------------------------------------------------------------------------------------------------------------------------------------------------------------------------------------------------------------------------------------------|-----|-----|------|------|
| 11947 AT4G26570.2   Symbol: ATCBL3                                                                                                                                                                                                                                                                                                                                                                                                    | 8.5 | 8.0 | 0.6  | 1.8  |
| 17317 AT1G80040.2   expressed protein   chr1:30114040-30116163 REVERSE   Aliases: F18B13.13, F18B13_13                                                                                                                                                                                                                                                                                                                                | 8.5 | 8.4 | 0.2  | 0.7  |
| 10637 AT5G41790.1   Symbol: CIP1   COP1-interactive protein 1 / CIP1, almost identical to CIP1 (GI:836950) (Arabidopsis thaliana)   chr5:16745606-16750004 FORWARD   Aliases: COP1 INTERACTIVE PROTEIN 1, K16L22.7, K16L22_7                                                                                                                                                                                                          | 8.5 | 9.8 | -1.3 | -2.2 |
| 1325 AT1G54780.1   thylakoid lumen 18.3 kDa protein, SP:Q9ZVL6   chr1:20443101-20444826 FORWARD   Aliases: T22H22.19, T22H22_19                                                                                                                                                                                                                                                                                                       | 8.5 | 6.4 | 2.2  | 8.6  |
| 1420 AT5G56910.1   expressed protein   chr5:23040148-23041428 FORWARD   Aliases: MHM17.2, MHM17_2                                                                                                                                                                                                                                                                                                                                     | 8.5 | 4.9 | 3.6  | 8.4  |
| 631 AT5G15750.1   RNA-binding S4 domain-containing protein, 40S RIBOSOMAL PROTEINs - different species   chr5:5141194-5142861 FORWARD   Aliases: F14F8.130, F14F8_130                                                                                                                                                                                                                                                                 | 8.5 | 6.4 | 2.1  | 11.1 |
| 11820 AT1G14730.1   similar to cytochrome B561 family protein [Arabidopsis thaliana] (TAIR:At4g25570.1); similar to putative cytochrome protein [Oryza sativa (japonica cultivar-group)] (GB:XP_469562.1); contains InterPro domain Cytochrome b561 / ferric reductase transmembrane (InterPro:IPR006593); contains InterPro domain Cytochrome b561 (InterPro:IPR004877)   chr1:5073100-5074774 FORWARD   Aliases: F10B6.13, F10B6_13 | 8.5 | 8.8 | -0.3 | -1.9 |
| 9555 AT3G49490.1   expressed protein   chr3:18355729-18359665 REVERSE   Aliases: T9C5.90                                                                                                                                                                                                                                                                                                                                              | 8.5 | 8.9 | -0.4 | -2.5 |
| 8154 AT5G46180.1   Symbol: delta OAT   ornithine aminotransferase, putative / ornithine--oxo-acid aminotransferase, putative, similar to SP:Q92413 Ornithine aminotransferase (EC 2.6.1.13) (Ornithine--oxo-acid aminotransferase) (Aspergillus nidulans) {Emericella nidulans}; contains Pfam profile PF00202: aminotransferase, class III   chr5:18735702-18738498 REVERSE   Aliases: MCL19.24, MCL19_24                            | 8.5 | 7.1 | 1.5  | 3.0  |
| 2576 AT3G25400.1   expressed protein   chr3:9214469-9215516 FORWARD   Aliases: MWL2.8                                                                                                                                                                                                                                                                                                                                                 | 8.5 | 6.8 | 1.7  | 6.6  |
| 4940 AT2G36240.1   similar to pentatricopeptide (PPR) repeat-containing protein [Arabidopsis thaliana] (TAIR:At1g09900.1); similar to putative pentatricopeptide repeat protein [Oryza sativa (japonica cultivar-group)] (GB:NP_909693.1); contains InterPro domain PPR repeat (InterPro:IPR002885); contains InterPro domain Proline-rich region (InterPro:IPR000694)   chr2:15202732-15204310 FORWARD   Aliases: F2H17.15, F2H17_15 | 8.5 | 6.8 | 1.7  | 4.6  |
| 12650 AT3G27570.1   expressed protein   chr3:10215233-10217973 REVERSE   Aliases: MMJ24.12                                                                                                                                                                                                                                                                                                                                            | 8.5 | 7.8 | 0.7  | 1.7  |
| 2937 AT5G64500.1   membrane protein-related, contains weak similarity to spinster type IV (GI:12003976) (Drosophila melanogaster)   chr5:25797608-25800880 FORWARD   Aliases: T12B11.9, T12B11_9                                                                                                                                                                                                                                      | 8.5 | 9.9 | -1.4 | -6.2 |
| 3407 AT1G09210.1   calreticulin 2 (CRT2), identical to SP:Q38858 Calreticulin 2 precursor {Arabidopsis thaliana}   chr1:2972844-2976731 REVERSE   Aliases: T12M4.8, T12M4_8                                                                                                                                                                                                                                                           | 8.5 | 6.6 | 1.9  | 5.7  |
| 12476 ATCG00130.1   Symbol: ATPF   ATPase F subunit.   chrC:11529-12798 REVERSE   Aliases: ATPF                                                                                                                                                                                                                                                                                                                                       | 8.5 | 7.0 | 1.5  | 1.7  |
| 10704 AT4G02150.1   Symbol: ATIMPALPHA3/MOS6   Encodes IMPORTIN ALPHA 3. Mutant plants act as suppressors of snc1 response and salicylic acid accumulation. Located in the nucleus. Involved in protein import.   chr4:950649-953689 REVERSE   Aliases: ATIMPALPHA3, MOS6, T10M13.16, T10M13_16                                                                                                                                       | 8.5 | 7.5 | 1.0  | 2.2  |
| 20340 AT1G72150.1   Symbol: PATL1   SEC14 cytosolic factor family protein / phosphoglyceride transfer family protein, similar to SEC14-like protein 2 (Alpha-tocopherol associated protein) (TAP) (bTAP) (Fragment) (SP:P58875) {Bos taurus}; similar to GI:807956 from (Saccharomyces cerevisiae); contains Pfam PF00650 : CRAL/TRIO domain; contains Pfam PF03765 : CRAL/TRIO, N-terminus                                           | 8.5 | 8.6 | -0.1 | -0.1 |
| 13835 AT3G51370.2   protein phosphatase 2C, putative / PP2C, putative, similar to Ser/Thr protein phosphatase 2C (PP2C6) (GI:15020818) (Arabidopsis thaliana); similar to protein phosphatase 2C (GI:3608412) (Mesembryanthemum crystallinum); contains Pfam PF00481 : Protein phosphatase 2C domain                                                                                                                                  | 8.5 | 9.0 | -0.5 | -1.4 |
| 13591 AT4G29120.1   6-phosphogluconate dehydrogenase NAD-binding domain-containing protein, similar to SP:P23523 2-hydroxy-3-oxopropionate reductase (EC 1.1.1.60) (Tartronate semialdehyde reductase) {Escherichia coli}; contains Pfam profile PF03446: NAD binding domain of 6-phosphogluconate dehydrogenase   chr4:14350864-14352018 FORWARD   Aliases: F19B15.150, F19B15_150                                                   | 8.5 | 7.9 | 0.6  | 1.5  |
| 538 AT2G42740.1   Symbol: RPL16A                                                                                                                                                                                                                                                                                                                                                                                                      | 8.5 | 5.6 | 2.9  | 11.7 |
| 4156 AT5G28840.1   NAD-dependent epimerase/dehydratase family protein, similar to sugar epimerase BlmG from Streptomyces verticillus GI:9937230; contains Pfam profile PF01370 NAD dependent epimerase/dehydratase family   chr5:10862177-10864906 REVERSE   Aliases: F7P1.20, F7P1_20                                                                                                                                                | 8.5 | 6.1 | 2.4  | 5.1  |
| 2553 AT2G28430.1   expressed protein   chr2:12166639-12167528 REVERSE   Aliases: T1B3.5, T1B3_5                                                                                                                                                                                                                                                                                                                                       | 8.5 | 6.0 | 2.5  | 6.6  |
| 2170 AT3G12360.1   ankyrin repeat family protein, contains ankyrin repeat domains, Pfam:PF00023   chr3:3934085-3936701 FORWARD   Aliases: T2E22.31                                                                                                                                                                                                                                                                                    | 8.5 | 9.8 | -1.3 | -7.2 |



|                                                                                                                                                                                                                                                                                                                                                                                                                                                                                                                                                                                                                                                                                                                                                                                                                                                                                                     |     |      |      |      |
|-----------------------------------------------------------------------------------------------------------------------------------------------------------------------------------------------------------------------------------------------------------------------------------------------------------------------------------------------------------------------------------------------------------------------------------------------------------------------------------------------------------------------------------------------------------------------------------------------------------------------------------------------------------------------------------------------------------------------------------------------------------------------------------------------------------------------------------------------------------------------------------------------------|-----|------|------|------|
| 9636 AT3G24800.1   Symbol: PRT1   PRT1 protein (PRT1), E3, N-end rule ubiquitin ligase, contains two RING finger domain; identical to PRT1 (Arabidopsis thaliana) GI:3319884   chr3:9055516-9058005 FORWARD   Aliases: K7P8.19, PROTEOLYSIS 1, PRT1                                                                                                                                                                                                                                                                                                                                                                                                                                                                                                                                                                                                                                                 | 8.5 | 9.1  | -0.6 | -2.5 |
| 4536 AT4G33670.1   L-galactose dehydrogenase (L-GalDH), identical to L-galactose dehydrogenase (Arabidopsis thaliana) GI:16555790; similar to L-fucose dehydrogenase (Pseudomonas sp.) GI:829054; contains Pfam profile PF00248: oxidoreductase, aldo/keto reductase family                                                                                                                                                                                                                                                                                                                                                                                                                                                                                                                                                                                                                         | 8.5 | 6.9  | 1.6  | 4.9  |
| 5075 AT1G78670.1   gamma-glutamyl hydrolase, putative / gamma-Glu-X carboxypeptidase, putative / conjugase, putative, similar to gamma glutamyl hydrolase GI:1679658 SP:P93164 from (Glycine max)   chr1:29595848-29598392 FORWARD   Aliases: F9K20.29, F9K20_29                                                                                                                                                                                                                                                                                                                                                                                                                                                                                                                                                                                                                                    | 8.5 | 10.0 | -1.5 | -4.5 |
| 15711 AT3G18035.1   Symbol: HON4   histone H1/H5 family protein, contains Pfam domain, PF00538: linker histone H1 and H5 family; similar to HMG I/Y like protein (GI:15706274) (Glycine max); similar to HMR1 protein (GI:4218141) (Antirrhinum majus); similar to high mobility group protein (GI:1483173) (Canavalia gladiata)   chr3:6169096-6171730 REVERSE   Aliases: HISTONE H1, MRC8.1                                                                                                                                                                                                                                                                                                                                                                                                                                                                                                       | 8.5 | 8.2  | 0.3  | 1.0  |
| 5393 AT1G08510.1   Symbol: FATB   acyl-(acyl carrier protein) thioesterase / acyl-ACP thioesterase / oleoyl-(acyl-carrier protein) hydrolase / S-acyl fatty acid synthase thioesterase, identical to acyl-(acyl carrier protein) thioesterase (Arabidopsis thaliana) GI:804948   chr1:2691083-2694380 REVERSE   Aliases: T27G7.19, T27G7_19                                                                                                                                                                                                                                                                                                                                                                                                                                                                                                                                                         | 8.5 | 10.5 | -2.1 | -4.3 |
| 4597 AT3G62880.2   similar to mitochondrial import inner membrane translocase subunit Tim17/Tim22/Tim23 family protein [Arabidopsis thaliana] (TAIR:At2g28900.1); similar to B1146F03.20 [Oryza sativa (japonica cultivar-group)] (GB:NP_914110.1); contains InterPro domain Mitochondrial import inner membrane translocase, subunit Tim17/22 (InterPro:IPR003397)                                                                                                                                                                                                                                                                                                                                                                                                                                                                                                                                 | 8.5 | 6.8  | 1.7  | 4.8  |
| 11441 AT1G04770.1   male sterility MS5 family protein, similar to male sterility MS5 (Arabidopsis thaliana) GI:3859112; contains Pfam profile PF00515 TPR Domain   chr1:1336370-1337838 REVERSE   Aliases: F13M7.24, F13M7_24                                                                                                                                                                                                                                                                                                                                                                                                                                                                                                                                                                                                                                                                       | 8.5 | 9.3  | -0.8 | -2.0 |
| 1255 AT4G24440.2   transcription initiation factor IIA gamma chain / TFIIA-gamma (TFIIA-S), identical to transcription initiation factor IIA gamma chain SP:Q39236 from (Arabidopsis thaliana);   chr4:12633190-12634767 FORWARD   Aliases: T22A6.270, T22A6_270                                                                                                                                                                                                                                                                                                                                                                                                                                                                                                                                                                                                                                    | 8.5 | 5.3  | 3.1  | 8.8  |
| 17335 AT1G55460.1   Kin17 DNA-binding protein-related, contains similarity to zinc finger protein rts2 GB:U16133 GI:563244 from (Saccharomyces cerevisiae)   chr1:20711144-20712690 FORWARD   Aliases: T5A14.13, T5A14_13                                                                                                                                                                                                                                                                                                                                                                                                                                                                                                                                                                                                                                                                           | 8.5 | 8.9  | -0.4 | -0.7 |
| 1476 AT5G57280.1   expressed protein   chr5:23221696-23223877 FORWARD   Aliases: MJB24.9, MJB24_9                                                                                                                                                                                                                                                                                                                                                                                                                                                                                                                                                                                                                                                                                                                                                                                                   | 8.5 | 6.0  | 2.5  | 8.3  |
| 15697 AT5G08080.2   Symbol: SYP132                                                                                                                                                                                                                                                                                                                                                                                                                                                                                                                                                                                                                                                                                                                                                                                                                                                                  | 8.5 | 8.7  | -0.2 | -1.0 |
| 14397 AT4G30530.1   defense-related protein, putative, strong similarity to defense-related protein (Brassica carinata) GI:14009290; contains Pfam profile PF00117: glutamine amidotransferase class-I   chr4:14920540-14922464 FORWARD   Aliases: F17I23.130, F17I23_130                                                                                                                                                                                                                                                                                                                                                                                                                                                                                                                                                                                                                           | 8.5 | 7.9  | 0.6  | 1.3  |
| 17408 AT3G22950.1   Symbol: ATARFC1   Gene encoding ADP-ribosylation factor and similar to ADP-ribosylation factor GB:P91924 (Dugesia japonica), other ARFs and ARF-like proteins. Members of this family are known to be essential for vesicle coating and uncoating and functions in GTP-binding.                                                                                                                                                                                                                                                                                                                                                                                                                                                                                                                                                                                                 | 8.5 | 8.2  | 0.2  | 0.7  |
| 1153 AT4G18700.1   Symbol: CIPK12                                                                                                                                                                                                                                                                                                                                                                                                                                                                                                                                                                                                                                                                                                                                                                                                                                                                   | 8.5 | 10.2 | -1.8 | -9.1 |
| 2904 AT1G03090.2   Symbol: MCCA   methylcrotonyl-CoA carboxylase alpha chain, mitochondrial / 3-methylcrotonyl-CoA carboxylase 1 (MCCA), nearly identical to SP:Q42523 Methylcrotonyl-CoA carboxylase alpha chain, mitochondrial precursor (EC 6.4.1.4) (3-Methylcrotonyl-CoA carboxylase 1) (MCCase alpha subunit) (3-methylcrotonyl-CoA:carbon dioxide ligase alpha subunit) {Arabidopsis thaliana}   chr1:739687-744184 FORWARD   Aliases: None                                                                                                                                                                                                                                                                                                                                                                                                                                                  | 8.5 | 9.4  | -1.0 | -6.2 |
| 9074 AT1G71950.1   expressed protein, similar to Pi starvation-induced protein GB:BAA06151 from (Nicotiana tabacum)                                                                                                                                                                                                                                                                                                                                                                                                                                                                                                                                                                                                                                                                                                                                                                                 | 8.5 | 7.8  | 0.7  | 2.7  |
| 19798 AT1G16350.1   inosine-5'-monophosphate dehydrogenase, putative, strong similarity to SP:P47996 gb:L34684 inosine monophosphate dehydrogenase (IMPDH) from Arabidopsis thaliana; member of the PF:00478 IMP dehydrogenase family   chr1:5590945-5592866 FORWARD   Aliases: F3O9.15, F3O9_15                                                                                                                                                                                                                                                                                                                                                                                                                                                                                                                                                                                                    | 8.5 | 8.6  | -0.1 | -0.2 |
| 4177 AT1G42990.1   Symbol: ATBZIP60   AtbZIP60 consists of a bZIP DNA binding domain followed by a putative transmembrane domain. GFP fusions containing the first 260 amino acids (AtbZIP60deltaC) are nuclear-localized. AtbZIP60 is upregulated by the addition of tunicamycin (ER stress response inductor), DTT (inhibitor of disulfide bond formation) and azetin-2-carboxylate (proline analog perturbing protein structure). It is hypothesized that upon ER stress the protein is proteolyzed and the soluble part translocated into the nucleus. AtbZIP60deltaC can activate the promoters of the ER chaperones BiP1, BiP2 and BiP3 and CNX1 and CNX2 via binding to the ER stress response element (ERSE) and the plant unfolded protein response element (P-UPRE). It can also activate its own transcription.   chr1:16138292-16139903 REVERSE   Aliases: ATBZIP60, F13A11.5, F13A11_5 | 8.5 | 9.7  | -1.2 | -5.1 |
| 900 AT1G09560.1   Symbol: GLP5   germin-like protein (GLP4) (GLP5), identical to Arabidopsis germin-like protein subfamily 2 member 1 (SP:P94014); Location of EST 180L10T7, gi:906417   chr1:3093841-3094864 FORWARD   Aliases: F14J9.22, F14J9_22, GERMIN LIKE PROTEIN 5, GLP5                                                                                                                                                                                                                                                                                                                                                                                                                                                                                                                                                                                                                    | 8.5 | 12.2 | -3.7 | -9.9 |
| 2216 AT2G02710.3   PAC motif-containing protein, similar to nonphototropic hypocotyl 1 (Zea mays) GI:2687358; contains Pfam profile PF00785: PAC motif   chr2:758696-760815 REVERSE   Aliases: T20F6.15, T20F6_15                                                                                                                                                                                                                                                                                                                                                                                                                                                                                                                                                                                                                                                                                   | 8.5 | 10.6 | -2.2 | -7.1 |

|                                                                                                                                                                                                                           |     |     |      |      |
|---------------------------------------------------------------------------------------------------------------------------------------------------------------------------------------------------------------------------|-----|-----|------|------|
| 20675 AT5G66030.2   Golgi-localized GRIP domain-containing protein, contains Pfam profile PF01465: GRIP domain; supporting cDNA gi:20303028:gb:AF499634.1:   chr5:26422147-26427114 REVERSE   Aliases: K2A18.10, K2A18_10 | 8.5 | 8.5 | -0.0 | -0.1 |
| 20203 AT5G61670.2   expressed protein   chr5:24800807-24803171 FORWARD   Aliases: K11J9.20, K11J9_20                                                                                                                      | 8.5 | 8.5 | -0.0 | -0.2 |
| 1324 AT3G05070.1   expressed protein   chr3:1416165-1417743 FORWARD   Aliases: T12H1.3, T12H1_3                                                                                                                           | 8.5 | 4.8 | 3.7  | 8.6  |
