# Supplementary material for: The transcriptome of syncytia induced by the cyst nematode Heterodera schachtii in Arabidopsis roots
Source: PubMed Central journal article supplement (PMC2667683; doi:10.1111/j.1365-313x.2008.03727.x), 2008-12-09
Supplement: TableS6.pdf [file TableS6.pdf]

**List of affected genes, confidential preview.**

*Statistics are testing for differential expression (two-sided non-null).*

Ranks refer to this test.

Results are grouped by

Differentially expressed with  $q < 5\%$   $M > 0$   
Differentially expressed with  $q < 5\%$   $M < 0$   
Non-differentially expressed,  $q$  of 5% or higher

Up-regulation  
Down-regulation  
Insignificant

Orthogonal contrasts examined:

15 dpi Syncytium vs 5 dpi Syncytium

... **Table 3**

Contact: D. Kreil  
<http://bioinf.boku.ac.at/>

| Rank | Description                                                               | 15.dpi | 5.dpi | M    | t     | adj.q | B   |
|------|---------------------------------------------------------------------------|--------|-------|------|-------|-------|-----|
| 2    | AT3G15840.3, expressed protein                                            | 6.4    | 2.3   | 4.0  | 14.9  | 0.65% | 7.4 |
| 3    | AT4G39675.1, expressed protein                                            | 8.8    | 2.4   | 6.5  | 12.4  | 1.93% | 6.1 |
| 4    | AT5G54940.2, eukaryotic translation initiation factor SUI1                | 11.7   | 9.6   | 2.1  | 11.1  | 3.43% | 6.3 |
| 5    | AT5G50790.1, nodulin MtN3 family protein                                  | 8.4    | 3.7   | 4.7  | 10.6  | 3.46% | 3.3 |
| 6    | AT5G10040.1, expressed protein                                            | 8.9    | 3.8   | 5.1  | 10.5  | 3.46% | 4.4 |
| 7    | AT1G08430.1, expressed protein                                            | 9.1    | 5.4   | 3.7  | 10.1  | 3.67% | 3.8 |
| 9    | AT1G27730.1, zinc finger (C2H2 type) family protein (ZAT10)               | 9.6    | 5.8   | 3.7  | 9.8   | 3.67% | 4.4 |
| 10   | AT4G33560.1, expressed protein                                            | 8.6    | 4.9   | 3.7  | 9.7   | 3.67% | 4.0 |
| 11   | AT5G65870.1, phytoalkanes 5 precursor (ATPSK5)                            | 7.1    | 3.6   | 3.5  | 9.6   | 3.67% | 4.4 |
| 12   | AT1G62480.1, vacuolar calcium-binding protein-related                     | 10.6   | 7.0   | 3.6  | 9.5   | 3.67% | 3.6 |
| 13   | AT3G19680.1, expressed protein                                            | 7.5    | 5.3   | 2.2  | 8.7   | 4.98% | 4.4 |
| 14   | AT5G10695.1, expressed protein                                            | 10.7   | 7.8   | 2.9  | 8.7   | 4.98% | 4.2 |
| 16   | AT3G03910.1, glutamate dehydrogenase, putative                            | 9.8    | 5.5   | 4.3  | 8.6   | 4.98% | 2.0 |
| 17   | AT1G10010.1, amino acid permease (AAP8)                                   | 8.6    | 5.4   | 3.2  | 8.5   | 4.98% | 3.3 |
| 18   | AT2G18050.2, histone HIS1-3                                               | 6.3    | 3.5   | 2.9  | 8.5   | 4.98% | 3.8 |
| 19   | AT3G48740.1, nodulin MtN3 family protein                                  | 9.8    | 4.4   | 5.4  | 8.4   | 4.98% | 1.9 |
| 20   | AT2G22860.1, phytoalkanes 2 precursor (ATPSK2)                            | 11.2   | 8.8   | 2.5  | 8.4   | 4.98% | 4.1 |
| 21   | AT2G17710.1, expressed protein                                            | 8.3    | 3.9   | 4.4  | 8.4   | 4.98% | 3.1 |
| 22   | AT1G74880.1, subunit NDH-O of NAD(P)H:plastoquinone dehydrogenase complex | 5.4    | 2.8   | 2.6  | 8.4   | 4.98% | 3.6 |
| 1    | AT3G60140.1, glycosyl hydrolase family 1 protein (DIN2)                   | 3.0    | 8.6   | -5.6 | -20.2 | 0.12% | 7.3 |
| 8    | AT5G05340.1, peroxidase, putative                                         | 2.8    | 8.8   | -6.0 | -9.8  | 3.67% | 4.9 |
| 15   | AT3G50300.1, transferase family protein                                   | 4.1    | 7.7   | -3.5 | -8.6  | 4.98% | 3.0 |
